# Supplementary material for: Quantitative Proteomics and Differential Protein Abundance Analysis after Depletion of Putative mRNA Receptors in the ER Membrane of Human Cells Identifies Novel Aspects of mRNA Targeting to the ER
Source: Molecules. 2021 Jun 11;26(12):3591. doi: 10.3390/molecules26123591 (PMC8230838; doi:10.3390/molecules26123591)
Supplement: Supplementary file 1 [file molecules-26-03591-s001.zip]

Archive with 15 entries (15 files):
- Description of Supplementary Tables..pdf
- original blots.pdf
- Table S10_negatively affected proteins.xlsx
- Table S11_positively affected proteins.xlsx
- Table S12_AREs in genes coding for negatively affected proteins.xlsx
- Table S13_proteomeXchange_identifiers.pdf
- Table S1_RRBP1_all.xlsx
- Table S2_RRBP1_full_lo.xlsx
- Table S3_RRBP1_full_up.xlsx
- Table S4_KTN1_all.xlsx
- Table S5_KTN1_full_lo.xlsx
- Table S6_KTN1_full_up.xlsx
- Table S7_ERj1_all.xlsx
- Table S8_ERj1_full_lo_2.xlsx
- Table S9_ERj1_full_up.xlsx
