# Supplementary material for: Quantitative Proteomics and Differential Protein Abundance Analysis after Depletion of Putative mRNA Receptors in the ER Membrane of Human Cells Identifies Novel Aspects of mRNA Targeting to the ER
Source: Molecules. 2021 Jun 11;26(12):3591. doi: 10.3390/molecules26123591 (PMC8230838; doi:10.3390/molecules26123591)
Supplement: Supplementary file 1 [file molecules-26-03591-s001.zip › Table S1_RRBP1_all.xlsx]

## Sheet: Sheet 1 - p180_all_summary_2
ID	Gene name	Fold change	Neg. log10 p-value 1	Neg. log10 p-value 2
P52594	AGFG1	0.0625	1.0271	0.3866
Q8N9N7	LRRC57	-0.3125	3.9339	0.5196
Q9BQA1	WDR77	-0.1619	0.2181	0.2917
P46777	RPL5	0.1165	0.799	0.1765
Q7L775	EPM2AIP1	0.051	2.0241	2.39
Q96AB3	ISOC2	0.3514	0.9488	0.8382
P43007	SLC1A4	-0.4432	0.7403	2.5618
Q01968	OCRL	0.4557	1.9367	0.4394
Q02252	ALDH6A1	-0.1033	0.162	0.3728
Q9BRF8	CPPED1	0.305	0.419	0.6369
O14965	AURKA	-0.1817	0.2737	1.3872
P25445	FAS	0.4703	4.2686	0.0212
Q09666	AHNAK	-0.0396	1.325	2.0663
Q9P2R3	ANKFY1	0.146	0.1559	0.9863
Q13362	PPP2R5C	-0.2803	0.2229	1.5365
Q96CD2	PPCDC	-0.0951	0.1033	0.727
Q9BVJ7	DUSP23	0.1702	0.636	0.4241
O60749	SNX2	0.2804	1.8219	1.2753
Q8IWX8	CHERP	0.2534	0.9817	0.3324
O75781	PALM	0.2065	0.8484	1.4177
Q9BYD1	MRPL13	-0.2966	1.1078	0.791
Q14197	ICT1	0.0389	0.6829	0.3005
Q96FQ6	S100A16	-0.1109	0.4689	0.2499
O95716	RAB3D	-0.9808	6.3131	1.1712
Q9NPI6	DCP1A	-1.0119	5.0031	4.1431
P49914	MTHFS	0.1792	0.2983	1.2338
Q96EB1	ELP4	-0.1847	0.3629	1.7915
P46778	RPL21	0.2578	1.2581	0.6183
Q99598	TSNAX	-0.1693	0.7519	0.319
Q13630	TSTA3	0.5344	2.5709	2.2888
Q96HC4	PDLIM5	-0.1143	0.298	1.4387
O14734	ACOT8	0.2228	0.144	1.0993
Q96CW5	TUBGCP3	0.4553	0.5455	1.4731
P60484	PTEN	0.8111	2.0317	0.4019
Q9Y5B0	CTDP1	-0.0314	0.9963	1.1252
O15254	ACOX3	-0.0311	0.5536	0.5238
P80723	BASP1	0.0477	0.0913	0.3639
Q9H9Y6	POLR1B	0.0044	0.4118	0.1869
Q9Y3A5	SBDS	-0.0456	0.2024	0.1016
O43852	CALU	-0.3171	2.5881	1.0738
P11166	SLC2A1	0.0263	0.3801	0.1626
Q5TGZ0	MINOS1	0.1859	0.536	0.4281
Q709C8	VPS13C	0.3418	1.893	1.6507
Q14166	TTLL12	0.1876	1.0409	0.6429
Q15366-3	PCBP2	-0.4348	0.2975	4.185
P62081	RPS7	-0.01	0.2984	0.5151
Q02543	RPL18A	0.147	0.4691	1.0626
Q9BQ95	ECSIT;ZNF428	0.0749	0.125	0.3029
O75937	DNAJC8	0.2449	0.3735	2.4017
Q10589	BST2	-0.0194	0.1794	0.4038
O95379-2	TNFAIP8	0.1997	0.1023	0.8489
P09429	HMGB1;HMGB1P1	-0.2498	0.6173	1.0409
O15269	SPTLC1	-1.1355	3.3755	5.9848
Q7Z6E9	RBBP6	0.652	1.6148	0.6949
Q9Y485	DMXL1	0.684	1.7866	2.5024
Q13464	ROCK1	-0.0916	0.6999	0.9144
Q9H223	EHD4	0.2739	2.1531	0.1701
P22392	NME2	0.4904	0.6123	1.4765
O96019	ACTL6A	0.1888	0.5734	1.1234
P51946	CCNH	0.005	0.2597	0.0979
Q9NS18	GLRX2	0.4268	0.1189	2.775
Q96CV9	OPTN	0.4792	1.8356	0.6874
Q9H9E3	COG4	-0.1543	1.3152	0.6396
Q15836	VAMP3	-0.0722	0.6404	1.9789
Q9H553	ALG2	0.3224	0.5085	1.853
Q5QJE6	DNTTIP2	0.0296	0.3892	0.7153
Q93096	PTP4A1	0.1008	0.0244	0.7242
Q9Y6X3	MAU2	-0.3285	0.9743	1.6117
P25789	PSMA4	-0.116	2.3627	0.6579
Q9NYP7	ELOVL5	-0.3695	0.3287	1.7369
Q5VTR2	RNF20	-0.176	0.3042	1.6027
O15116	1	0.1756	0.1721	1.4992
Q8IZ81	ELMOD2	0.2893	1.3911	0.0317
Q13813	SPTAN1	0.0694	0.7355	0.0339
P07992	ERCC1	-0.3218	1.2277	0.8211
Q96DG6	CMBL	0.4183	1.038	1.6449
Q01780	EXOSC10	-0.0728	0.6258	0.0283
Q9Y296	TRAPPC4	0.0952	0.0353	0.5316
P82921	MRPS21	-0.7819	1.3149	0.3857
Q16795	NDUFA9	0.1565	0.3312	0.7375
O43683	BUB1	0.0306	0.2537	0.0194
P09651	HNRNPA1;HNRNPA1L2	-0.1734	1.0843	0.7195
O96028	WHSC1	-0.0091	0.7383	0.9494
P49588	AARS	0.3287	2.0579	2.2659
Q9NQ50	MRPL40	0.1842	0.6012	0.2691
P33764	S100A3	0.2579	0.2844	1.8517
Q14680	MELK	-0.1696	0.172	0.0896
Q92620	DHX38	-0.0612	0.4006	0.0394
Q9UH99	SUN2	-1.3598	2.7184	4.0941
P30486	HLA-B	-0.1005	0.0646	0.5778
P27695	APEX1	-0.0686	1.4479	0.6782
Q9Y3C6	PPIL1	-0.2814	3.2437	0.1172
Q92979	EMG1	-0.3109	2.283	0.7059
Q8NCH0	CHST14	0.465	2.8595	0.6213
O94776	MTA2	-0.0578	0.2459	0.1481
Q6P4H8	FAM173B	-0.411	2.55	0.4206
Q93009	USP7	0.0987	0.8175	0.0158
Q9NPI1	BRD7	0.3026	0.2245	2.658
Q9H7D0	DOCK5	0.0764	2.9029	1.0908
Q9Y4E6	WDR7	0.018	0.075	0.0262
P11413	G6PD	0.1888	1.2082	0.8544
P10746	UROS	0.6986	1.0923	1.3087
O60502	MGEA5	0.3878	1.4903	2.3638
Q6PJ69	TRIM65	0.7418	2.2543	3.6596
Q06787	FMR1	1.1206	2.919	0.8799
Q9H1D9	POLR3F	0.0126	0.3021	0.4302
Q9NY61	AATF	0.0015	0.3814	0.5527
Q6PGP7	TTC37	0.2044	0.7665	1.2601
Q86U90	YRDC	0.0116	3.0266	1.815
Q9UGU0	TCF20	0.3757	3.7319	0.0627
Q15637-5	SF1	-0.6098	0.5052	1.53
P60033	CD81	0.1484	1.2209	2.5497
Q9NVC6	MED17	0.5568	0.5423	2.0356
P14678	SNRPB;SNRPN	0.4845	1.0243	1.1533
Q9UK41	VPS28	0.3249	1.9966	0.589
Q9NR33	POLE4	-0.0653	0.1449	0.5126
Q8WW59	SPRYD4	0.0915	0.0476	0.459
Q93077	HIST1H2AC;HIST1H2AG;H2AFJ;HIST1H2AJ;HIST1H2AH	-0.1957	1.6137	0.6334
Q9H840	GEMIN7	0.204	0.3813	0.2446
Q00169	PITPNA	0.6807	3.9368	2.7352
Q96G28	CCDC104	0.4848	1.1454	1.3479
Q9Y6B6	SAR1B;DKFZp434B2017	-0.3514	0.8977	1.6266
P47897	QARS	-0.2032	2.5386	0.0614
Q96I15	SCLY	0.3811	1.7755	3.9678
Q8TF72	SHROOM3	0.6616	1.3109	2.3737
Q99622	C12orf57	0.0137	0.6445	0.4625
O00139	KIF2A	-0.4793	1.4571	1.3828
Q04656	ATP7A	-0.0916	0.1482	0.6407
Q8N5C6	SRBD1	0.5626	0.0122	2.5943
Q8N8A6	DDX51	-0.3255	1.4334	0.8034
Q8NFH3	NUP43	-0.3548	2.2284	0.7983
Q9HB07	C12orf10	-0.0463	0.5148	0.2901
Q00653	NFKB2	0.4506	4.721	0.6666
O14908	GIPC1	0.2573	0.6417	0.8673
Q15070	OXA1L	-0.1259	0.4942	1.5577
P62993	GRB2	0.5807	4.1211	2.1411
Q9H5V8	CDCP1	-0.4761	0.2171	2.6853
Q96JB5	CDK5RAP3	0.4001	1.9165	1.319
Q9BQC3	DPH2	-0.0165	0.8916	0.8879
Q96CS3	FAF2	0.2686	0.3661	1.4008
Q9NR30	DDX21	-0.2722	0.6707	2.637
Q8WXA9-2	SREK1	0.1034	0.4701	0.0343
P82663	MRPS25	0.1472	0.2354	0.9214
Q5JTH9	RRP12	-0.1113	2.0575	0.5954
Q8IX12	CCAR1	0.2196	1.3472	0.3138
P07099	EPHX1	0.1482	3.4438	1.0854
P83111	LACTB	0.3489	2.5554	0.0259
Q9UHV9	PFDN2	-0.1152	0.2943	0.2541
P08238	HSP90AB1	0.0112	0.0503	0.0391
P10515	DLAT	0.1401	1.3056	0.2455
Q9BZE4	GTPBP4	-0.1548	1.6091	0.0983
Q02809	PLOD1	-0.0864	0.7205	0.0733
P28370	SMARCA1	-0.0891	0.0248	0.4565
Q9H0K6	PUS7L	-0.4465	1.2235	0.5986
P46459	NSF	0.1929	0.3364	1.9118
Q9UKV3	ACIN1	-0.0857	0.5144	0.1789
Q9BYX2	TBC1D2	0.4259	3.6399	1.1252
Q9UHR6	ZNHIT2	0.1422	0.8927	0.1989
Q96AT1	KIAA1143	-0.3947	0.9506	0.9471
Q8IZ83	ALDH16A1	0.4111	0.3934	2.2058
Q3B726	TWISTNB	0.3018	0.7934	0.6834
Q9NRR4	DROSHA	0.0194	0.616	0.9679
B4DL37	AKR1C3	-0.0678	0.0944	0.2801
O00567	NOP56	-0.1175	0.7071	0.0219
O43159	RRP8	0.0415	0.1158	0.1595
O43684	BUB3	0.0879	0.4254	0.1931
O43149	ZZEF1	0.8046	1.5673	1.5872
O60437	PPL	0.3752	3.6791	0.5864
Q9Y305	ACOT9	0.21	1.0483	0.7079
P42771	CDKN2A	-0.1113	1.9025	0.6685
M0QYT0		-0.0786	0.0363	0.4872
Q13627	DYRK1A	0.7867	3.25	1.6986
Q07955	SRSF1	-0.0239	0.1662	0.0145
Q92667	AKAP1	-0.3814	2.3173	0.1049
Q9UN86-2	G3BP2	-0.0454	0.4557	0.9334
P13647	KRT5	-1.4573	3.1243	0.8935
Q53H82	LACTB2	0.2051	1.6853	0.1183
P31948	STIP1	0.128	1.0196	0.4855
P56378	MP68;C14orf2	0.5245	2.4586	0.8366
Q9BZG1	RAB34	-0.0501	0.4407	0.0064
Q8IVT2	MISP	-0.222	1.2815	0.7302
P61978-3	HNRNPK	-0.1405	0.9089	0.3858
Q5BJF2	TMEM97	0.6089	2.1191	0.4583
Q6UB35	MTHFD1L	-0.3423	3.4772	0.5333
Q16719	KYNU	0.0893	0.9674	0.0762
P54709	ATP1B3	-0.4849	1.8589	1.1958
Q9BY89	KIAA1671	-0.0774	0.1862	0.7208
Q16658	FSCN1	-0.1128	0.7486	0.0266
Q9Y478	PRKAB1	-0.1675	0.0169	0.4505
Q6IN85	SMEK1	0.0582	0.4892	0.0796
P37268	FDFT1	-0.6532	0.5534	4.4088
Q96MX6	WDR92;DKFZp434B156	0.484	1.2396	2.2643
Q9UGP8	SEC63	-0.1235	0.0372	1.1065
Q15555	MAPRE2	-0.5654	2.4234	1.4375
Q9NXR1	NDE1	-0.6409	1.7619	4.7678
Q8WVT3	TRAPPC12	1.6878	6.8691	0.1206
Q8IWA4	MFN1	-0.2328	0.0478	1.0369
P27707	DCK	-0.5342	2.4052	0.228
Q9H8V3	ECT2	-0.0544	0.141	0.022
O60942	RNGTT	0.1905	0.9089	0.0568
I3L2B0	CLUH	0.0554	0.2392	0.0016
O00499	BIN1	-0.1303	0.2053	1.406
E7EVA0	MAP4	-0.1014	0.7117	0.2784
Q9H1Y0	ATG5	-0.185	0.4891	0.0054
J3KNZ5	SORBS2	0.3659	0.4485	2.1717
P62633	CNBP	-0.1019	0.0289	0.6856
P83436	COG7	-0.0483	1.0698	0.4026
Q9UK45	7	0.2185	0.4251	0.8998
Q99715	COL12A1	-0.1939	0.6532	0.0239
P31483	TIA1	0.2646	0.1526	1.9335
O15514	POLR2D	-0.4581	1.3135	1.0828
O75751	SLC22A3	0.2116	1.0344	0.9843
Q99871	HAUS7	0.0459	0.6007	0.3401
O75909	CCNK	-0.0664	0.4331	0.0525
F8VZX2	PCBP2	-0.0912	0.4993	0.0366
Q8NFD5	ARID1B	0.1971	0.6924	0.1218
P60842	EIF4A1	0.1254	0.4155	0.9683
Q15046	KARS	-0.0204	0.7479	0.5229
Q03169	TNFAIP2	0.2266	1.5421	0.0277
P34897	SHMT2	-0.1358	1.0776	0.1612
Q86UL3	AGPAT6	-0.1043	2.8463	0.5629
Q9H871	RMND5A	0.7782	5.2134	0.5875
Q15029	EFTUD2	-0.1424	0.8293	0.4767
Q92841	DDX17	-0.0212	0.5259	0.329
Q14691	GINS1	-0.9584	1.2958	5.1989
Q9P000	COMMD9	-0.5112	0.1612	1.8533
P26006	ITGA3	-0.4529	0.4936	3.8416
P33981	TTK	0.2752	0.1663	1.2773
Q8IX01	SUGP2	0.1584	2.1283	4.6935
Q8WWH5	TRUB1	-0.3945	1.4939	0.8495
Q15293	RCN1	-0.1505	0.4904	2.1552
Q5BJH7-4	YIF1B	0.0873	0.421	0.0896
P51970	NDUFA8	0.4841	0.9689	1.0311
Q9BZH6	WDR11	-0.557	3.8431	1.4513
Q7Z5K2	WAPAL	-0.4128	0.3496	3.2278
Q9BT22	ALG1	0.2938	0.347	0.6213
Q6PI48	DARS2	-0.4238	4.0203	1.2591
O15382	BCAT2	0.0721	0.0954	0.4193
O43237	DYNC1LI2	-0.1754	0.6604	0.4072
Q8WU90	ZC3H15	0.2595	0.7048	1.5667
P31150	GDI1	0.5357	3.1627	1.4254
Q9GZT6	CCDC90B	-0.0131	0.1961	0.0771
Q9Y4W2	LAS1L	0.1669	0.6288	0.6737
Q96BR5	COA7	-0.0838	0.2444	1.0017
Q8NEZ2	VPS37A	0.2472	1.7415	0.0682
Q15435	PPP1R7	0.01	0.5464	0.5306
O00767	SCD	-0.5633	0.5198	3.9574
Q96AQ6	PBXIP1	-1.1191	5.4351	3.7729
Q8IXI2	RHOT1;TMEM91	0.3848	1.6226	0.331
Q9ULM6	CNOT6	0.0987	0.8277	0.0532
Q9HD34	LYRM4	0.4251	1.8268	2.4935
P00374	DHFR	-0.1403	0.7239	0.2656
Q92945	KHSRP	0.3598	2.2199	2.605
Q9UBR2	CTSZ	-0.4222	0.9954	1.1185
Q9NR50	EIF2B3	0.0222	0.2886	0.1135
P29084	GTF2E2	0.0885	0.2293	0.2849
Q8N3C0	ASCC3	0.1225	0.2725	0.4164
O75376	NCOR1	-1.0595	2.1861	2.4114
P62070	RRAS2	-0.835	0.2937	2.9858
Q9H4G0-2	EPB41L1	0.2288	3.54	0.8856
Q9BQ69	MACROD1	0.3902	1.1142	1.2153
Q96BD5	PHF21A	1.2771	10.1442	4.6681
P42677	RPS27;RPS27L	0.4229	1.3401	1.0938
Q14232	EIF2B1	0.1051	0.0747	0.7355
H3BPE1	MACF1	0.0621	1.9542	1.0828
P98179	RBM3	-0.2838	0.1947	1.9072
P78537	BLOC1S1	0.9657	1.3119	4.1169
O95361	TRIM16	0.3768	3.284	1.5863
Q8NBS9	TXNDC5	-0.2666	1.8716	0.5811
O76070	SNCG	0.8845	5.9577	3.7881
Q13751	LAMB3	-0.267	0.0889	0.7626
Q9BXW7	CECR5	-0.1339	0.3564	0.3785
Q9NV56	MRGBP	-0.3711	0.7148	0.7557
O43299	AP5Z1	0.662	3.3847	2.5395
P61803	DAD1	-0.181	0.519	0.556
Q92796	DLG3	-0.0052	0.0863	0.1482
Q15723-4	ELF2	-1.4102	6.3238	5.9038
O00217	NDUFS8	0.2889	0.5997	2.1546
P12236	SLC25A6	0.0443	0.0756	0.5201
O14967	CLGN	0.0549	0.6544	0.28
P35754	GLRX	0.0234	0.6851	1.0436
Q14651	PLS1	0.2447	0.9955	0.4318
Q15388	TOMM20	-0.2139	0.8325	0.3807
Q9H0W8	SMG9	-0.4894	3.053	2.2268
Q68D10	SPTY2D1	0.5101	2.7597	2.0106
P18858	LIG1	-0.1379	0.5493	0.7324
P13051	UNG;DKFZp781L1143	0.5428	0.5384	2.2366
Q9H9T3-2	ELP3	0.3347	0.1829	1.1986
Q9NWZ5	UCKL1	0.5478	3.1	2.1528
Q13043	STK4	-0.035	0.6906	0.6167
Q6UW63	KDELC1	0.1878	0.7659	0.207
Q8NC60	NOA1	1.013	1.5497	2.0578
O60518	RANBP6	-0.0602	0.2006	0.6084
H0YAR2	PABPC1	0.0202	0.4748	0.2535
Q9NSK0	KLC4	-0.2461	1.7237	0.5047
Q8NFV4	ABHD11	-0.127	0.2194	0.554
O60313	OPA1	-0.0126	0.561	0.5493
O00401	WASL	0.2014	1.032	0.1092
Q86VQ1	GLCCI1	0.9372	3.5202	4.4028
Q08499-6	PDE4D;DPYSL3	0.8992	5.5764	5.5833
Q9Y383	LUC7L2	-0.1692	0.8735	0.4627
Q6P087	RPUSD3	0.7256	1.4747	1.643
Q9UBQ7	GRHPR	0.2994	1.4172	2.014
P11234	RALB	-0.2176	0.8083	0.0656
Q6NS38	ALKBH2	0.0416	0.0833	0.0365
Q9HD26	GOPC	-0.3116	1.7372	0.1569
Q7L5D6	GET4	0.1715	0.4661	0.4214
O95248	SBF1	0.5829	1.1756	1.3885
Q9UKI8-2	TLK1	0.0726	0.0875	0.4923
Q5VT66	MARC1;MARC2	-0.436	2.4584	5.1488
Q96JJ7	TMX3	-0.1693	0.7465	0.2788
O00429	DNM1L	-0.0161	0.7831	0.6345
Q9BTV4	TMEM43	-0.1674	0.9176	0.3903
Q9H9Q4	NHEJ1	-0.8647	5.8574	0.6761
A3KMH1	VWA8	-0.0656	0.0117	0.2564
P62241	RPS8	0.2331	1.3026	1.3403
Q6FI81	CIAPIN1	0.2092	0.8068	1.0473
O60762	DPM1	0.2306	2.3094	0.1439
Q9H6W3	NO66	0.5111	1.0942	1.2294
O95298	NDUFC2	0.2192	1.4626	0.4104
Q03519	TAP2	-0.3824	2.177	0.1088
P26373	RPL13	-0.0538	0.4717	0.0206
Q99471	PFDN5	0.1246	0.4699	0.2774
Q01201	RELB	-0.0088	2.6197	2.4759
O95563	MPC2	0.3182	1.0974	0.0848
Q9UJX3	ANAPC7	-0.073	0.0829	0.4612
Q9UKN8	GTF3C4	-0.228	1.2268	0.749
O75323	GBAS	0.0081	0.6434	0.6333
Q9H2W6	MRPL46	0.1996	0.8841	0.5861
Q9Y5T5	USP16	0.3261	0.565	1.3476
Q12824	SMARCB1	-0.0063	0.0234	0.0851
Q8IV50	LYSMD2	-5.6342	17.3939	17.464
Q13426	XRCC4	-0.0098	0.0016	0.2798
Q9BRG1	VPS25	0.3461	1.4883	0.9706
P21912	SDHB	0.4026	0.1888	3.1068
Q9NRX2	MRPL17	0.2971	0.3792	1.0769
P15311	EZR	-0.1396	2.1243	0.0493
Q9P0U1	TOMM7	0.3824	0.0266	1.561
P30530	AXL	-0.4741	1.3983	1.3719
P49841	GSK3B	-0.0759	2.6365	1.4293
P38606	ATP6V1A	0.5632	2.3816	3.3958
Q9H3S7	PTPN23	0.1721	0.1619	0.889
Q6P9B6	TLDC1	0.0005	0.6589	0.5939
Q12788	TBL3	0.2579	0.0359	2.452
Q9Y5L0	TNPO3	0.1758	0.2574	2.0045
O00442	RTCA	0.5256	1.4566	0.7286
Q9Y282	ERGIC3	0.4737	0.2001	1.63
Q99836	MYD88	-0.0046	0.2327	0.3766
Q9Y2F5	ICE1	0.4673	1.2472	0.3177
Q9H788	SH2D4A	-0.2136	0.3133	0.9276
Q15393	SF3B3	0.0143	0.0885	0.2059
P62906	RPL10A	0.2128	0.6971	0.6623
P61158	ACTR3	-0.007	0.5271	0.6953
P15880	RPS2	-0.044	0.2306	0.0895
P07858	CTSB	-0.3221	1.4742	0.0265
O00443	PIK3C2A	0.1275	0.1325	0.2141
Q9HB71	CACYBP	0.1237	0.4911	0.5265
Q86XI2	NCAPG2	-0.4647	0.6626	1.9292
P27797	CALR	0.0206	0.0236	0.1405
P21333	FLNA	0	0	0
Q9Y613	FHOD1	-0.1222	1.263	1.8249
Q8TC07-2	TBC1D15	0.1043	0.2081	0.4957
O43768	ENSA	-0.1452	0.1513	1.3261
P47712	PLA2G4A	0.4175	3.0448	1.0167
P30085	CMPK1	-0.1567	0.3874	0.9405
Q9NYK5	MRPL39	0.1014	0.4614	0.1387
P16435	POR	0.5809	3.0796	1.4626
G3V325	ATP5J2-PTCD1;ATP5J2	0.1621	0.411	0.6099
P78371	CCT2	-0.0133	0.0923	0.1831
F5GWP8	KRT17	-0.3691	1.678	2.1996
Q6NUK1	SLC25A24	0.0755	1.0695	0.0566
Q7LBR1	CHMP1B	0.2057	0.9981	2.0991
Q86UK7	ZNF598	-0.0461	0.0317	0.0821
Q02818	NUCB1	-0.0194	0.3139	0.131
O43663	PRC1	-0.3038	0.0207	1.7951
Q8TC12	RDH11	-0.0284	0.2617	0.3361
Q8IX04	UEVLD	-0.8597	0.5848	1.1132
Q68DH5	LMBRD2	-0.0344	0.2064	0.2636
Q15050	RRS1	-0.2234	2.0602	0.0931
P50613	CDK7	-0.3764	0.44	0.9896
Q9HD33	MRPL47	0.188	0.5469	0.4979
P07954	FH	0.185	0.0747	2.1843
Q5HYK7	SH3D19	-1.5896	0.0959	8.6062
Q9NYL4	FKBP11	0.4828	1.7519	0.3813
Q9BPW8	NIPSNAP1	0.0649	0.0607	0.5494
P61020	RAB5B	-0.9381	4.2317	2.0509
P30101	PDIA3	-0.4299	0.4064	4.8075
Q8NEJ9	NGDN	-0.193	0.3958	0.5808
Q13409-3	DYNC1I2	0.3052	1.8204	1.2747
A5YKK6	CNOT1	-0.0414	0.6394	0.3263
Q96EX1	SMIM12	0.4951	1.8575	1.647
Q96K17	BTF3L4	-0.1544	0.9825	0.0746
B4DLN1	MRPL12	-0.0993	0.7675	0.1312
P40261	NNMT	-0.1861	1.2178	0.543
P62316	SNRPD2	0.0948	0.0526	0.9308
Q9NQS1	AVEN	0.4287	0.7417	1.3823
Q8WX92	NELFB	0.0906	0.1194	0.4849
P22695	UQCRC2	0.1201	0.6904	0.1216
Q9Y4W6	AFG3L2	0.1824	1.1091	0.5809
Q13595	TRA2A	0.418	0.6998	1.0166
O94874	UFL1	0.4879	1.0117	2.7508
Q00536	CDK16;CDK14	0.3674	0.7707	1.7391
Q15436	SEC23A	0.0131	0.0127	0.1122
P00973	OAS1	0.7872	5.5183	0.2766
P29692	EEF1D	-0.09	0.7227	0.0014
O60232	SSSCA1	0.4484	2.3782	0.0304
Q92734	TFG	0.0258	1.1977	0.977
P53597	SUCLG1	0.1835	1.1961	0.3937
P57737-3	CORO7;PAM16	-0.2552	0.3351	1.7181
P51151	RAB9A	-0.4703	1.1238	0.2696
Q15124	PGM5	0.4607	0.0643	1.3791
Q9UHD9	UBQLN2	-0.6414	2.5314	1.033
P17858	PFKL	0.3461	1.5457	1.1297
Q8IWZ8	SUGP1	0.3513	1.6023	1.3018
O15427	SLC16A3	0.4178	2.9237	0.6062
P80303	NUCB2;DCAF5	0.2768	1.5157	0.8678
Q9H8Y8	GORASP2	0.4083	1.2496	1.2758
Q6BCY4	CYB5R2	-0.432	1.1299	0.3268
Q14980	NUMA1	-0.1724	0.2031	2.7047
Q96MU7	YTHDC1	0.1883	0.5084	0.4642
Q9NR46	SH3GLB2	-0.1628	2.2605	0.9639
P61927	RPL37	-1.0833	1.6511	1.7004
Q96C57	C12orf43	-0.006	0.8552	1.1206
O76031	CLPX	0.0341	0.3761	0.0439
Q9P258	RCC2	0.0743	0.3513	0.9459
P51858	HDGF	0.2843	1.3289	1.6611
Q9NQ55	PPAN	-0.3892	1.0156	0.1042
P46734	MAP2K3	0.2295	1.3877	0.2273
Q9UKY7	CDV3	0.3829	1.2982	1.6664
P46108	CRK	-0.2918	2.5554	0.516
Q13227	GPS2	-0.9688	0.1822	9.4645
Q9Y446	PKP3	0.6579	1.6578	1.4478
P20700	LMNB1	-0.0989	1.1586	0.0716
P62328	TMSB4X;TMSB4XP4	0.2005	1.2217	0.3663
Q14699	RFTN1	0.6199	2.5647	1.9257
Q9UNZ2	NSFL1C	-0.286	0.3182	1.5864
Q9C0C9	UBE2O	0.2739	1.2216	0.5283
P32320	CDA	-0.1431	0.1699	0.7684
Q8WU79	SMAP2	0.8589	0.9501	3.1418
P51114	FXR1	-0.3437	4.2133	0.4241
Q27J81	INF2	-0.0543	0.7236	1.5089
O75368	SH3BGRL	0.3054	0.3238	1.5089
Q9H074	PAIP1	0.0479	0.4012	0.1249
P50995	ANXA11	0.3961	3.4952	1.4713
P00966	ASS1	1.0768	5.7322	1.4086
Q8WUB8	PHF10	-0.2384	0.3919	1.5398
P37235	HPCAL1;HPCA	0.3471	2.0649	0.6767
Q96PU8	QKI	-0.8687	3.2766	1.5675
Q00534	CDK6	-0.9732	3.2611	2.8851
P08670	VIM	-0.3539	1.9954	1.6515
Q14061	COX17	0.199	0.9939	0.4202
Q9NUP9	LIN7C	-0.0772	0.1683	0.2019
Q08945	SSRP1	0.0367	0.1858	0.5054
Q8WWV3	RTN4IP1	-0.3306	1.2691	0.1947
Q9UKK9	NUDT5	-0.0341	0.3006	0.0072
Q6PIW4	FIGNL1	0.9591	4.7167	0.4901
Q96SW2	CRBN	0.3848	0.641	1.6037
Q9UN37	VPS4A	0.3126	0.5659	1.8596
Q13485	SMAD4	0.4986	1.8318	0.4895
Q9Y5J1	UTP18	-0.0553	1.3296	1.1522
Q9UJX4	ANAPC5	-0.2123	0.6348	0.4243
O43813	LANCL1	-0.1288	0.5512	0.7087
O43617	TRAPPC3	-0.3235	0.5342	1.1515
Q92905	COPS5	-0.3153	1.3815	0.9887
P29590	PML	0.1807	0.0404	2.4398
Q8IZ21	PHACTR4	0.4458	1.401	0.6982
Q92900	UPF1	0.0002	0.1115	0.1213
Q9Y530	OARD1	-0.1608	0.3771	0.6452
Q5F1R6	DNAJC21	-0.0511	0.1065	0.3616
P61513	RPL37A	0.3426	1.0103	2.5747
P07602	PSAP	0.5569	3.9631	1.353
Q9H0U3	MAGT1	0.052	0.1522	0.2109
P38117	ETFB	0.3173	1.4084	0.8127
Q9NY33	DPP3	0.2616	0.5429	1.5782
Q12882	DPYD	-0.1092	0.2923	0.579
O75489	NDUFS3	0.2563	0.9188	1.5502
P55209	NAP1L1	-0.143	0.0224	1.2328
P62857	RPS28	0.0373	0.0219	0.1945
Q5GLZ8	HERC4	0.0917	0.9738	0.1986
P62847	RPS24	0.0115	0.2264	0.3489
Q96RP9	GFM1	0.0786	2.0241	0.8469
Q3ZCQ8-2	TIMM50	0.1099	0.4515	0.2571
Q9Y4L1	HYOU1	-0.1978	0.3521	1.8141
Q8N3V7-2	SYNPO	0.336	3.1097	0.2456
Q6GMV3	PTRHD1	0.4372	0.5132	2.757
Q96TA2	YME1L1	0.0566	0.021	0.5258
Q9UHA3	RSL24D1	0.1203	0.004	0.805
Q9H1B7	IRF2BPL	0.3342	1.6372	0.1743
P26232	CTNNA2	-0.6037	8.8797	0.6207
Q9Y5S2	CDC42BPB	-0.5435	2.6784	1.5287
Q68E01	INTS3	-0.3312	1.0047	0.9585
P22830	FECH	0.485	1.4039	2.2476
Q08752	PPID	0.0117	0.4767	0.6696
Q86VI3	IQGAP3	0.2362	1.7194	0.1583
Q969S3	ZNF622	0.1204	0.3935	1.6991
Q9UKS6	PACSIN3	-0.0871	0.2166	0.6256
Q3KQV9	UAP1L1	-0.2622	0.6127	0.3098
O15327	INPP4B	-0.1284	0.5495	0.1419
Q96EL3	MRPL53	-1.2882	1.0076	0.8721
Q9NZJ0	DTL	-0.0695	1.4384	1.5499
H7BZ18	MCFD2	-0.0407	0.1232	0.1887
Q9UII4	HERC5	0.9155	5.8209	1.3748
Q9Y2X3	NOP58	-0.1996	2.0598	0.1401
Q8N3F8	MICALL1	1.1174	3.3021	3.7951
Q9UBN4	TRPC4;TRPC5	0.2297	3.3114	0.7567
Q7Z4W1	DCXR	0.3891	1.6852	0.8125
Q16775	HAGH	0.4464	3.2085	0.8408
P33778	HIST1H2BB;HIST2H2BE;HIST1H2BO;HIST1H2BJ	0.2396	0.1082	0.1168
Q96GD0	PDXP	-0.187	0.0265	0.6689
Q86W42	THOC6	0.1018	0.0906	0.7099
G5E9M5	ILF3	-0.0413	0.3018	0.0334
Q13813-3	SPTAN1	0.3504	0.4696	1.3666
P42575	CASP2	0.21	0.2951	0.6444
Q5VW32	BROX	0.0883	0.1789	0.4629
O95571	ETHE1	0.0117	0.2437	0.2074
O00754	MAN2B1	0.2002	0.7688	0.3133
Q9UNZ5	C19orf53	-0.0569	1.2275	0.2932
Q96IX5	USMG5	-1.1389	0.2044	8.2204
P61254	RPL26;KRBA2;RPL26L1	0.0374	0.1114	0.3978
P46926	GNPDA1	-0.8487	0.3282	6.6569
Q9H9C1	VIPAS39	-0.6985	3.5097	3.2002
Q9HD67	MYO10	-0.1173	0.1449	0.7666
O75663	TIPRL	-0.4789	0.4477	2.2067
Q56P03	EAPP	0.7546	1.1138	3.7235
Q96EI5	TCEAL4	-0.1735	0.7926	0.1506
Q13085	ACACA	-0.1799	1.42	0.342
P06744	GPI	0.0708	0.0127	0.5981
Q15022	SUZ12	-0.0727	0.0498	0.2667
Q9NYZ1	TVP23B;TVP23C;TVP23C-CDRT4	-1.4023	1.2638	8.0683
Q9Y2Z0	SUGT1	-0.1	0.8661	0.0443
Q9Y3C7	MED31	-0.071	1.9638	1.9516
Q66K74	MAP1S	-0.2357	0.4507	1.0288
O43815	STRN	-0.9366	0.0386	3.6467
P26885	FKBP2	-0.0171	0.4448	0.4235
P15848	ARSB	0.123	0.0163	0.4931
Q5SY16	NOL9	-0.286	1.3294	0.3837
Q9H8Y5	ANKZF1	0.4068	0.0791	2.3347
Q14790	CASP8	-0.3956	0.6604	0.0448
O75369-8	FLNB	0.1227	1.7404	0.1724
Q9UBU9	NXF1	-0.0894	0.3886	0.1841
D6RED7	RPS3A	0.1621	0.0112	0.8043
Q92947	GCDH	0.6795	2.8118	1.1301
O75787	ATP6AP2	-0.0629	0.2634	0.0275
Q15843	NEDD8;NEDD8-MDP1	-0.037	0.1035	0.3569
P61006	RAB8A	-0.0552	0.0534	0.047
Q15003	NCAPH	-0.4675	0.3848	3.5106
P18124	RPL7	0.2495	1.74	1.4922
O75449	KATNA1	-0.6302	2.4558	0.316
Q9Y2W2	WBP11	0.0371	0.2888	0.348
O43805	SSNA1	-0.2757	1.9124	0.1073
P49840	GSK3A	-0.2162	1.136	0.2762
Q8IUR7	ARMC8	0.6323	1.5782	1.6162
Q4LE39	ARID4B	0.1749	1.1302	0.1494
Q14376	GALE	0.1204	0.8449	2.0341
Q9H1E3	NUCKS1	-0.0496	1.4169	2.2726
O75582	RPS6KA5	-0.0174	3.164	2.3663
P14735	IDE	0.6413	4.9135	3.0983
B4DFK6	CNN3	-0.2138	0.1947	1.123
Q8NI60	ADCK3	-0.1013	1.5789	0.5419
P17980	PSMC3	-0.0336	0.2716	0.0294
O14929	HAT1	-0.3132	2.5891	0.9841
P22694	PRKACB	0.2135	1.1494	0.0455
Q9NX20	MRPL16	0.2617	1.1808	1.8682
Q7Z6M1	RABEPK	0.2343	1.9189	0.018
Q8N3D4	EHBP1L1	-0.0343	0.9831	0.791
O60488	ACSL4	-0.2241	2.4141	0.2132
Q13439	GOLGA4	-0.1339	1.0183	1.4769
Q14847	LASP1	-0.1819	1.7174	0.0469
P78417	GSTO1	0.1474	1.2471	0.1445
Q7Z569	BRAP	0.5279	1.4994	2.0699
Q96PZ0	PUS7	0.2409	0.0355	1.8623
O14497	ARID1A	0.1637	0.3491	0.4756
Q14186	TFDP1	0.3034	0.4251	2.3803
O95251	KAT7	0.2761	0.8784	0.4808
O95881	TXNDC12	-0.3014	1.44	0.2635
O95721	SNAP29	-0.1432	0.0944	0.3825
Q08379	GOLGA2	0.3534	2.6986	0.6826
P36952	SERPINB5	0.1896	2.6051	0.1992
P67936	TPM4	-0.1424	0.5763	0.6712
Q9UBP6	METTL1	-0.0237	1.8165	1.5914
P15586	GNS	-0.5918	1.877	2.4242
Q9UBT2	UBA2	-0.033	0.1884	0.0788
Q7Z3J2	C16orf62	-0.3752	0.6331	3.2154
O75665	OFD1	-1.8295	4.2198	9.6533
P12277	CKB	-0.2654	1.0679	1.3813
Q8NI27	THOC2	0.2324	0.9571	1.6299
P05783	KRT18	0.5924	3.3847	3.1081
Q13542	EIF4EBP2	0.3065	0.1935	1.5167
Q13618	CUL3	-0.21	1.1257	0.5349
Q16799	RTN1	0.067	0.547	0.0184
P62273	RPS29	0.8175	1.7779	1.5484
Q92925-3	SMARCD2	0.0271	0.092	0.309
Q8NBF6	AVL9	0.2146	2.0661	0.7355
P15408	FOSL2	0.5953	1.0351	2.318
P62258	YWHAE	-0.7627	0.0787	7.7766
Q14146	URB2	0.0829	0.0953	0.6724
Q6P996	PDXDC1	0.5009	3.5809	2.7171
Q9NVU0	POLR3E	-0.7269	2.9001	0.1128
P82970	HMGN5	-0.0584	0.6033	0.317
Q9Y285	FARSA	-0.1174	0.684	0.0357
P62826	RAN	0.0183	0.0561	0.0899
Q12769	NUP160	-0.21	0.8367	0.6779
O75832	PSMD10	-0.0979	0.6058	0.2733
P28288	ABCD3	0.2181	0.9894	0.575
Q9NQR4	NIT2	0.0446	0.1697	0.1712
P62308	SNRPG;SNRPGP15	-0.5282	1.9754	1.2067
P12956	XRCC6	0.1805	0.5043	1.5358
Q6YP21	CCBL2	0.2465	0.0396	0.6457
P35579	MYH9	-0.2163	1.0502	1.1525
Q70J99	UNC13D	-0.375	1.4944	2.1847
O75044	SRGAP2;SRGAP2C	-0.7266	2.0775	3.0653
Q7Z7K6-3	CENPV	0.1206	0.0626	0.7829
Q99459	CDC5L	0.0418	0.0713	0.4636
Q9BUF5	TUBB6	-0.1605	0.5288	0.4549
Q9NVP1	DDX18	-0.2263	2.5325	0.0786
F5GZK0	PLEKHA2	-0.8113	0.531	2.7454
Q9BW19	KIFC1	-0.384	0.1345	2.9004
Q9NQW6	ANLN	-0.1559	0.2739	1.4929
P35237	SERPINB6	-0.0683	0.0544	0.6785
Q12899	TRIM26	-0.1723	0.0952	0.8504
Q96CX2	KCTD12	-0.2888	2.5393	5.6403
Q7Z4G1	COMMD6	-0.3241	0.0597	1.3783
Q9Y324	FCF1	-0.0891	0.32	0.0345
Q9NWX5	ASB6	-0.1545	0.1827	0.7136
Q9BSE5	AGMAT	-1.5968	6.9027	4.1116
O00330	PDHX	0.3064	1.5873	0.8362
P27708	CAD	-0.014	0.021	0.1026
Q9Y6M5	SLC30A1	-0.0701	0.0606	0.5435
P30622-2	CLIP1	0.1	0.8928	0.0003
O00764	PDXK	0.1207	0.7657	0.3516
Q8NBJ5	COLGALT1	-0.2225	2.9445	0.0553
Q9UPN9	TRIM33	0.0053	0.288	0.2442
Q15646	OASL	0.7554	7.619	0.5571
Q70CQ2	USP34	0.119	0.0792	0.455
P14209	CD99	0.208	1.1272	0.2832
Q5T5Y3	CAMSAP1	-0.2361	0.0491	0.3932
Q9UIV1	CNOT7	-0.504	0.3565	2.4533
Q96E39	RBMXL1	0.3329	0.1116	1.99
Q9NWS0	PIH1D1	-0.1033	0.2079	0.6448
P84095	RHOG	0.0083	0.2035	0.3199
Q16401	PSMD5	0.254	0.9217	1.7725
A6NKT7	RGPD3	-0.253	0.5411	1.1431
P13929	ENO3	0.3744	1.3511	2.7383
O60925	PFDN1	0.0714	0.3641	1.0853
P61421	ATP6V0D1	0.2558	1.3052	0.8533
O76094	SRP72	-0.1258	2.1312	0.8188
Q04206	RELA	-0.1137	0.5395	0.1147
Q16531	DDB1	0.0116	0.2005	0.0802
Q14240	EIF4A2	0.5478	0.2017	3.2007
Q9NRK6	ABCB10	-0.1265	0.1825	0.5506
O95470	SGPL1	-0.1562	1.5099	0.1896
Q3YEC7	RABL6	0.033	0.3409	0.5871
P13473-2	LAMP2	0.0999	0.2422	0.2836
P11766	ADH5	-0.1628	0.8221	0.1386
Q9BWH6	RPAP1	-0.3296	1.2148	0.7518
Q8TB36	GDAP1	0.311	3.3557	0.7311
Q9BSD7	NTPCR	0.1154	0.5404	1.469
Q14155-1	ARHGEF7	0.1706	0.0035	0.8407
Q9H6V9	C2orf43;FLJ21820	0.5088	2.0707	1.7477
Q8IYB5	SMAP1	0.1912	0.7087	0.5643
P50238	CRIP1	-0.0028	1.6134	1.696
Q9Y6K0	CEPT1	0.0425	0.7656	0.3824
Q5VZF2	MBNL2;MBLL	-0.1381	0.151	0.7495
Q9H4I3	TRABD	0.0588	0.1539	0.214
O60231	DHX16	0.1626	0.8606	0.0317
P51159	RAB27A	-0.3174	0.7445	1.8757
P13798	APEH	0.1422	0.7736	0.4827
Q7Z6R9	TFAP2D	1.155	0.4744	0.606
Q9H7B4	SMYD3	0.2713	2.9846	0.7296
Q9H0W9	C11orf54	-0.1341	1.3873	0.6531
Q9BRJ6	C7orf50	-0.5492	1.5593	0.7643
Q86UP2	KTN1	-0.3547	2.6968	1.6002
Q969G5	PRKCDBP	-0.4703	1.5837	0.8755
E7EQ69	NAA50	0.4387	2.0494	0.5518
P26639	TARS	-0.1571	1.248	0.457
Q96AC1	FERMT2	-0.393	1.8897	3.0389
P33176	KIF5B	-0.3102	0.7556	3.3862
Q9Y3S1	WNK2	-0.2925	0.9453	0.2346
Q5U5X0	LYRM7	0.039	0.0897	0.3906
Q99536	VAT1	0.03	1.6068	1.8733
Q9BZJ0	CRNKL1	0.3638	1.0706	3.3838
Q5T6F2	UBAP2	-0.268	0.1182	4.2764
Q9BRR6	ADPGK	-0.4129	1.1201	1.8442
P46063	RECQL	-0.1661	0.3875	1.0378
Q7Z6K5	ARPIN;C15orf38-AP3S2	-0.6752	2.1923	0.3083
Q9NS87	KIF15	-0.27	0.0034	1.5923
Q9BU23	LMF2	0.3244	1.2357	0.1976
Q9Y6X9	MORC2	-0.2869	0.7083	0.1714
Q9UKL0	RCOR1	-0.3001	0.8745	1.5108
P39656	DDOST	0.0127	0.2236	0.0907
Q96E11	MRRF	-0.3658	2.6727	0.1755
P49419-2	ALDH7A1	0.1298	0.183	0.8843
Q96LJ7	DHRS1	0.1962	1.9021	0.2554
Q08380	LGALS3BP	0.7688	2.9043	4.2078
Q15853	USF2;USF1	-1.1434	3.6241	3.7234
P82930	MRPS34	-0.3978	3.3762	0.7511
Q96PU5	NEDD4L;ZNF227	-0.1082	0.1602	0.0367
Q96L92	SNX27	0.1588	0.4918	0.3377
Q9Y3B8	REXO2	-0.2298	2.6335	1.1462
Q71UM5	RPS27L	0.4324	1.4029	1.9596
Q9UID3	VPS51	-0.4456	0.7911	1.3786
O75592	MYCBP2	0.6788	1.5356	1.4781
Q9P035	PTPLAD1	-0.0072	0.4384	0.2756
P25685	DNAJB1	-0.3649	3.2927	0.4306
Q14684	RRP1B	-0.0572	2.9216	1.7799
Q9BX68	HINT2	0.312	1.8064	0.112
Q16822	PCK2	0.1794	0.7013	0.4212
P49454	CENPF	-0.1668	0.3938	0.487
P27348	YWHAQ	-0.0384	0.0237	0.2017
P55081	MFAP1	-0.141	0.8511	0.2167
Q06265	EXOSC9	-0.4166	1.8523	2.3335
Q14194	CRMP1	-0.2457	0.7263	2.4214
P61457	PCBD1	0.9774	2.6426	1.3989
Q96SZ6	CDK5RAP1	-0.0432	0.9517	0.5849
Q5VT25	CDC42BPA	0.0099	1.1961	1.1712
Q8WWY3	PRPF31	-0.1804	1.1101	0.5069
Q9UKZ1	CNOT11	-0.2089	0.7268	0.4268
Q01628	IFITM3	0.0489	0.4783	0.137
Q8NCG7	DAGLB	0.2081	0.6279	0.1671
Q9H0A8	COMMD4	-0.5976	1.7258	2.4454
Q01995	TAGLN	-0.9574	6.7218	3.5016
Q96FN4	CPNE2	-0.4307	1.4907	0.1407
H0YH82	CS	0.2879	1.1725	0.7233
P78362	SRPK2	0.5937	3.5633	0.7925
O15061	SYNM	1.0598	0.921	2.9781
Q8IWB7	WDFY1	0.1651	0.9643	1.8516
P35221	CTNNA1	-0.6761	7.0563	2.4904
O95833	CLIC3	0.5212	0.018	3.7641
Q9BXR0	QTRT1	1.204	3.0193	3.2104
Q8WWM7	ATXN2L	-0.0336	0.086	0.1904
Q9NSU2	TREX1	-0.6703	1.3696	1.6302
O14530	TXNDC9	0.0036	0.2266	0.1748
Q6PKG0	LARP1	-0.0602	0.4866	0.0191
P27824	CANX	0.1876	1.1329	0.7402
P46821	MAP1B	-0.1814	1.0845	0.3128
Q15154	PCM1	-0.2965	1.0074	0.8632
P33121	ACSL1	0.8659	1.5144	1.6886
P04899	GNAI2	-0.086	0.3624	1.1199
P30043	BLVRB	0.3756	1.2478	2.0515
P29353	SHC1	0.1012	0.5936	0.0979
Q9ULX3	NOB1	-0.003	0.4238	0.4099
Q9BVQ7	SPATA5L1	0.3176	1.6704	0.6155
Q9UNK0	STX8	0.4053	1.3986	2.8062
Q9NZ63	C9orf78	0.0857	0.3314	0.2599
Q96FZ7	CHMP6	-2.2652	0.7766	0.6535
Q9P0N9	TBC1D7	0.4088	0.8589	0.4403
Q8WUH6	TMEM263	0.9561	4.2993	2.3379
P55786	NPEPPS	0.2335	1.8361	0.8726
Q9H0Z9	RBM38;RBM24	-0.1231	0.6665	3.2745
Q9BZE1	MRPL37	0.0067	0.06	0.0128
P59998	ARPC4;ARPC4-TTLL3	-0.0363	0.0783	0.0598
P10606	COX5B	0.4308	1.4362	2.7548
O15504	NUPL2	0.199	0.0781	1.5066
P52907	CAPZA1	-0.1736	0.0297	1.8493
Q15398	DLGAP5	-0.0532	0.6941	0.8179
P08559	PDHA1	0.048	0.6386	0.1425
Q9H5V9	CXorf56	-0.0429	0.5749	0.6402
P16219	ACADS	0.622	2.5799	1.3998
P45985	MAP2K4	0.2954	1.7398	0.2841
Q2TAL8	QRICH1	-0.5312	2.0604	0.9859
P48506	GCLC	0.2232	2.0217	0.2393
Q9H446	RWDD1	0.3158	0.6371	1.3697
Q96KR1	ZFR	-0.0246	0.0587	0.3371
Q9Y277	VDAC3	0.1963	0.3274	1.0378
P48729	CSNK1A1	-0.1651	0.2524	0.5856
Q96JJ3	ELMO2	0.214	0.7729	0.3369
P51571	SSR4	-0.4525	0.2193	1.1964
Q8TD19	NEK9	-0.4459	0.1583	2.8387
P09914	IFIT1	0.927	5.6153	0.2714
Q15120	PDK3	0.125	0.1149	0.5203
O60613	SEP15	0.2956	0.1286	3.9882
Q01105	SET	0.0154	0.2286	0.3822
Q9P287	BCCIP	-0.0877	2.4689	1.3048
Q9H7C9	AAMDC	0.4718	2.3891	1.4845
Q9Y262	EIF3L	-0.0562	0.1665	0.7549
P55061	TMBIM6	2.9537	2.0279	0.3528
P35222	CTNNB1	-0.2948	2.586	0.4018
Q8IWV8	UBR2	-0.1314	0.3274	1.3464
Q9NVH1	DNAJC11	-0.1124	0.3049	0.4552
P49023-2	PXN	0.1381	0.4431	0.4845
P23246	SFPQ	-0.059	0.1021	0.4056
P49711	CTCF	-2.3929	2.7303	1.6625
Q15643	TRIP11	0.4408	2.4141	0.2382
P62861	FAU	0.0193	0.1964	0.375
P04040	CAT	0.0323	0.0137	0.2604
Q96TC7	RMDN3	-0.0736	1.1781	1.7158
P14927	UQCRB	0.2805	0.5348	1.5073
Q9Y5N5	N6AMT1	-0.2587	0.5347	0.6692
Q96KG9	SCYL1	0.2312	0.5435	1.8359
O60841	EIF5B	-0.4403	2.9059	2.4508
O14979	HNRNPDL	-0.2471	0.9138	0.5182
Q8N4Q1	CHCHD4	0.5057	2.5644	1.9665
Q9UP95	SLC12A4	0.1532	1.3409	0.2573
Q9NS86	LANCL2	-0.3205	1.2032	0.0776
Q9NW15	ANO10	-0.2332	1.5661	0.048
O14949	UQCRQ	0.0632	0.0528	0.3644
P61289	PSME3	-0.2645	2.912	0.3623
P62158	CALM1;CALM2;CALM3	0.2189	0.6141	1.0141
Q6P4E1	CASC4	-0.1036	0.3008	1.2125
Q8NCA5	FAM98A	0.1938	2.0543	0.3179
Q9UMY4	SNX12	0.1125	0.2158	0.8075
Q9NX70	MED29	-0.0079	0.2256	0.2209
Q14315	FLNC	0.1908	0.0213	1.716
Q12768	KIAA0196	0.5197	0.794	1.2648
O60493	SNX3	-0.3618	1.3482	1.6617
E7ETB3	DNPEP	0.631	2.7516	2.5619
P63104	YWHAZ	-0.4118	6.3132	0.4872
Q676U5	ATG16L1	0.2834	0.711	0.5633
P38432	COIL	-0.6544	0.8981	1.6643
P28482	MAPK1	-0.3675	1.7286	0.6172
A0MZ66	KIAA1598	0.4041	3.0839	0.683
Q6L8Q7	PDE12	0.2317	2.0967	0.3608
Q9UBL3	ASH2L	0.129	0.8421	0.1024
Q9Y2L1	DIS3	0.1199	0.0947	1.3288
P13667	PDIA4	-0.1579	1.0198	0.3192
Q04760	GLO1	0.1813	0.6502	0.9951
Q330K2	NDUFAF6	0.3077	1.9046	1.614
P51148	RAB5C	-0.1132	0.2985	0.3377
Q13325	IFIT5	0.1509	2.023	0.3054
Q9BTD8	RBM42	-0.0705	0.5615	0.2423
P17544	ATF7	0.3087	0.6771	0.7999
Q3B7T1	EDRF1	-0.357	0.7725	0.5017
Q14011	CIRBP	-0.2392	0.7826	2.4301
Q9UPU5	USP24	0.0078	1.2647	1.0617
Q13185	CBX3	-0.0289	0.0214	0.2174
P62256	UBE2H	-0.1162	0.6727	0.1558
Q14152	EIF3A	0.0403	0.1749	0.1803
Q5VZ89	DENND4C	0.4892	2.3396	1.0591
Q5JPE7	NOMO2;NOMO1;NOMO3	-0.0421	0.4948	0.9193
Q93015	NAT6	0.5394	0.613	1.8847
P61221	ABCE1	0.1617	0.5215	1.1326
P05388	RPLP0;RPLP0P6	0.0058	0.1211	0.067
P06493	CDK1	0.0079	1.7883	1.5295
P06576	ATP5B	0.2121	1.2198	1.0988
Q05682-4	CALD1	-0.7016	5.2488	2.9912
Q8WUD4	CCDC12	0.0964	0.5352	0.0839
O95232	LUC7L3	0.1455	0.1069	1.6511
Q9NQP4	PFDN4	0.1328	0.2301	0.5395
Q8TEQ6	GEMIN5	0.0483	0.1171	0.4707
Q8N5K1	CISD2	0.2119	0.2926	0.9961
Q96H55	MYO19	0.3736	1.0186	0.5486
Q7KZF4	SND1	-0.0386	0.3325	0.024
P50990	CCT8	-0.0436	0.0981	0.3091
P19404	NDUFV2	0.0793	0.2689	0.1837
P62318	SNRPD3	-0.1174	0.5517	0.1168
Q9UM54	MYO6	0.2426	0.2425	1.5061
Q9HC35	EML4	0.0026	0.9446	0.9286
Q9NX14	NDUFB11	-0.0827	0.7901	1.0881
Q9NY27	PPP4R2	-0.1306	0.0804	1.0687
O43504	LAMTOR5	-0.247	0.7175	0.2192
Q99797	MIPEP	-0.053	0.3219	0.0651
Q86X83	COMMD2	-0.7448	1.6222	4.7423
Q9H2M9	RAB3GAP2	0.0969	0.2092	0.5422
Q8N3X1	FNBP4	0.29	1.4356	1.186
Q5LJA5	UCHL5	-0.3525	0.2549	2.562
Q14807	KIF22	-0.3877	0.6621	1.8795
Q13243	SRSF5	0.1724	0.7024	0.6525
Q7Z2W4	ZC3HAV1	0.2931	3.4253	0.0408
Q15477	SKIV2L	0.2177	0.516	1.2904
P52943	CRIP2	0.0063	0.4183	0.6016
Q4KMP7	TBC1D10B	0.3772	1.0943	1.2359
P51784	USP11	0.014	0.1448	0.2512
Q9NZL9	MAT2B	-0.3175	0.4113	2.7389
Q8TF65	GIPC2	0.6665	0.5911	2.598
O15318	POLR3G	-0.9303	3.6626	0.7998
G3V5T0	GSTZ1	-0.8077	0.236	4.3878
P40429	RPL13A	0.0799	0.1595	0.9864
P62495	ETF1	-0.146	0.2372	1.5173
Q9H6F5	CCDC86	0.0625	0.0229	0.4325
Q13330	MTA1	0.5754	1.2763	3.9636
Q99497	PARK7	0.1551	0.7587	0.7118
Q13247	SRSF6	-0.0258	0.0968	0.1389
Q8TAE8	GADD45GIP1	-0.0194	0.7093	0.8365
Q9BV68	RNF126	-0.5904	2.8453	0.7563
Q9BUQ8	DDX23	0.1048	0.0978	1.1389
Q96HS1	PGAM5	0.0271	0.0371	0.1768
Q9H7D7	WDR26	0.3574	1.7332	0.7628
Q96MW1	CCDC43	-0.0032	0.5143	0.507
Q9C005	DPY30;LOC84661	0.0607	0.2228	0.7157
Q9H3R5	CENPH	-0.9436	6.4354	1.238
P28347	TEAD1;TEAD4;TEAD3;TEAD2	0.0576	0.1855	0.3755
Q9HAV7	GRPEL1	0.3608	1.3061	1.7203
Q99627	COPS8	0.2815	0.8473	0.8347
Q9H0V9	LMAN2L	0.3469	0.0031	1.8392
Q08AF3	SLFN5;MAP3K10	0.3561	1.59	0.2774
Q9NRX4	PHPT1	0.0865	0.5733	0.0937
P35244	RPA3	0.1705	0.1734	1.4469
Q15691	MAPRE1	-0.0732	0.0737	0.461
P16220	CREB1	-0.2814	1.5763	0.6873
Q9NUJ3	TCP11L1	-1.1639	0.5154	6.1617
Q14257	RCN2	-0.2846	0.7138	1.3679
P08758	ANXA5	-0.0299	0.2521	0.512
O95573	ACSL3	0.1551	1.8568	0.1225
Q04917	YWHAH	-0.0307	0.4016	0.1422
Q712K3	UBE2R2	-0.2111	0.2868	0.8536
O43583	DENR	0.2356	1.5161	0.6742
P50542	PEX5	-0.1865	0.3119	0.2744
O14936	CASK	-0.0011	0.1176	0.1074
P23497	SP100	0.4358	3.2502	0.3114
O00244	ATOX1	-0.0078	0.0459	0.039
Q641Q2	FAM21A;FAM21B	0.2072	1.0337	0.6231
P11172	UMPS	0.2097	1.7907	0.734
Q9NZ45	CISD1	0.5141	2.1144	1.0249
P61970	NUTF2	0.3238	0.3286	2.1865
Q6QNY1	BLOC1S2	0.1547	0.3791	0.4488
P56556	NDUFA6	-0.0362	0.1606	0.1024
Q8TCS8	PNPT1	0.3808	2.5281	2.09
Q9UKJ3	GPATCH8	0.0675	0.0783	0.5891
P30566	ADSL	0.1963	0.1049	2.427
Q9BVC4	MLST8	-1.1696	4.183	4.1993
P42765	ACAA2	-0.074	0.1598	0.3516
Q6FI13	HIST2H2AA3;HIST2H2AC	-0.1726	1.3114	0.2673
Q9UMX5	NENF	0.002	0.5382	0.616
Q9UH62	ARMCX3	0.3858	3.6435	0.2024
O94906	PRPF6	-0.129	1.4538	0.1486
P53618	COPB1	0.1544	1.1843	0.2191
Q5T280	C9orf114	-0.2307	1.0994	0.1498
Q5VYK3	ECM29;KIAA0368	-0.112	0.3895	0.7725
P45973	CBX5	-0.2207	0.1105	1.9785
Q96D46	NMD3	0.1338	0.6715	0.0557
Q9H0U6	MRPL18	0.9198	5.5214	3.2297
Q96EP5	DAZAP1	0.0304	0.0123	0.1714
P49753	ACOT2	0.4048	5.6124	0.0601
B7Z9C2	NAP1L1	0.3752	6.2581	0.3127
P83916	CBX1	0.0503	0.3621	0.6317
C9JFE4	GPS1	-0.1706	0.5824	1.046
Q96HW7	INTS4	-0.3497	2.1897	0.131
P31040	SDHA	0.377	4.217	0.4909
O95400	CD2BP2	0.2988	0.2747	1.4165
P43307	SSR1	0.002	1.5361	1.6051
Q9H3Q1	CDC42EP4	-0.3361	1.6366	1.3101
Q13263	TRIM28	0.0597	0.14	0.4193
Q92600	RQCD1	0.0384	0.3011	0.063
Q5T6V5	C9orf64	0.063	0.2663	0.1021
Q49A26	GLYR1	-0.2034	0.0942	1.228
Q9NUQ8	ABCF3	0.0754	1.3048	0.5129
Q9BYD6	MRPL1	-0.0104	1.0753	1.2552
Q13206	DDX10	-0.1084	0.3754	0.2236
Q8N7H5	PAF1	0.277	0.3771	2.1066
P33991	MCM4	0.1735	0.4203	1.4065
P08133	ANXA6	-0.1088	0.1728	1.3264
Q96AX1	VPS33A	0.4292	0.3843	2.628
Q9H2P9	DPH5	0.4459	0.7609	1.3679
Q9BQE5	APOL2	0.0451	2.5467	2.5487
Q9BXY0	MAK16	0.1144	0.1324	0.885
P21980	TGM2	-0.7251	2.0581	2.7028
Q9H792	PEAK1	0.7217	1.5539	1.5044
Q9Y2S6	TMA7	0.2078	0.379	1.7274
Q8IZ73	RPUSD2	0.2175	0.9591	0.2123
Q86W92	PPFIBP1	-0.6138	4.3321	1.4288
O14618	CCS	0.02	0.228	0.0637
Q12965	MYO1E	0.1254	0.8401	0.2078
P30154	PPP2R1B	-1.2372	4.9951	4.2635
Q9GZU8	FAM192A	0.1746	0.3663	0.6003
Q8NBW4	SLC38A9	1.0289	4.1518	1.7999
Q14687	GSE1	-0.3568	1.6201	0.873
Q9UDY8	MALT1	-0.5182	1.0149	5.465
Q96DH6	MSI2;IGSF9B	-0.3347	0.4568	1.7513
Q9BSC4	NOL10	0.2779	0.0891	2.6056
Q9H173	SIL1	0.4592	0.8445	2.2999
Q15149	PLEC	-0.0625	1.5389	0.4698
Q6DKI1	RPL7L1	-0.0227	1.0362	0.7438
Q96G01	BICD1;GLYAT	-1.0737	0.5731	8.7156
Q9NP73-2	ALG13	1.1479	1.3131	1.5095
O75410	TACC1	-1.2872	7.8774	1.8782
Q9Y696	CLIC4	-0.7454	0.6561	5.757
Q9NVI1	FANCI	-0.2812	0.6773	2.0619
P51617	IRAK1	0.7994	0.6081	0.2582
Q92888	ARHGEF1	0.1062	0.0754	0.8497
P63279	UBE2I	-0.3208	1.8926	0.9471
Q9Y316	MEMO1	0.0573	0.0334	0.4398
Q9Y3E5	PTRH2	0.5414	1.6977	2.0278
Q9Y520	PRRC2C	-0.271	0.4718	4.2791
P20339	RAB5A	-0.0081	0.5544	0.5638
P30042	C21orf33	0.1674	0.057	0.8627
Q16774	GUK1	0.2339	0.2978	1.4829
Q13232	NME3	-0.1985	1.1415	0.0662
Q8NHG7	SVIP	1.2445	0.7831	12.7576
P51580	TPMT	0.0615	0.9271	0.4371
P10155	TROVE2	0.0252	0.099	0.3181
P53634	CTSC	-0.1588	0.1011	1.0557
O15294	OGT	-0.0882	0.4448	0.322
Q13523	PRPF4B	0.4791	1.9212	2.4408
P43897	TSFM	0.242	1.1161	0.8967
Q3MHD2	12	-3.8889	1.7145	0.931
Q8NAV1	PRPF38A	-0.2265	0.2555	0.9358
Q66K14	TBC1D9B	0.5551	2.1187	2.6628
P62745	RHOB	-0.0484	1.1711	1.8182
Q9NX18	SDHAF2	-0.6629	2.7398	1.3206
Q9Y6A5	TACC3	0.0434	0.3143	0.0209
P62330	ARF6	0.1293	1.1161	0.1339
Q96PK6	RBM14	0.1327	0.3148	0.5768
P41229	KDM5C	-0.0468	0.576	0.1969
O43795	MYO1B	0.1164	1.3248	0.0225
Q969G6	RFK	-0.1522	0.2145	1.2802
Q6H3X3	RAET1G;ULBP2;RAET1L	0.1922	0.0589	0.6909
P09601	HMOX1	1.7298	7.1245	3.6047
P45984	MAPK9	0.0844	0.548	0.0398
Q15847	ADIRF	0.2293	0.6719	0.4005
Q9BQ61	C19orf43	-0.2566	0.008	0.476
Q5VWZ2	LYPLAL1	0.5754	1.004	3.1261
Q86VN1	VPS36	0.0348	0.5329	0.9364
Q96HA7	TONSL	-0.9265	1.9011	3.44
P35241	RDX	0.3952	2.0921	1.5287
Q9HC21	SLC25A19	-0.4361	1.2424	0.6523
P41214	EIF2D	-0.1034	0.3859	1.3268
Q86W56	PARG	0.0445	0.0565	0.2578
Q9H307	PNN	-0.1361	1.0713	0.2899
P56181-2	NDUFV3	-0.2386	1.0029	0.0201
P61353	RPL27	0.5184	1.2103	2.5493
Q99460	PSMD1	0.012	0.3704	0.5287
Q8TCJ2	STT3B	-0.0693	0.6516	1.1756
Q96S44	TP53RK	0.2534	0.1034	1.9376
Q14192	FHL2	-0.109	1.1517	0.5685
Q96P70	IPO9	-0.1256	0.0562	1.2496
P53680	AP2S1	-0.3092	0.1464	1.1285
P47756-2	CAPZB	-0.0663	0.1877	0.8356
Q9NYL9	TMOD3	-0.3279	0.4042	3.9036
P36871	PGM1	0.1361	1.7307	0.319
O14950	MYL12B;MYL12A	0.069	0.4913	0.0097
Q15717	ELAVL1	-0.6102	7.3667	0.2706
Q92783	STAM	0.464	2.4861	1.8156
P31930	UQCRC1	-0.0343	0.2728	0.6146
P08174	CD55	-0.4425	1.7892	1.1608
Q9BXK5	BCL2L13	-0.0166	0.0511	0.2612
O75970	MPDZ	-0.5412	1.7611	2.4061
Q9NSY0	NRBP2;MIR6845	0.1886	0.8749	0.1051
Q86UE4	MTDH	0.1459	0.0689	1.1064
Q13042	CDC16	-0.0273	0.1047	0.2588
O75691	UTP20	-0.4281	2.7683	0.3568
P22059	OSBP	0.2637	1.4157	0.8936
Q5VT52	RPRD2	-0.1774	0.4677	0.7684
O15371	EIF3D	-0.0042	0.1229	0.0727
K7EIG1	CLUH	0.1207	0.518	0.3308
Q9UDY2	TJP2	-0.0495	0.4161	0.6305
Q00403	GTF2B	0.3681	0.9574	1.0835
Q6P1N0	CC2D1A	-0.3105	3.74	0.1547
P58557	YBEY	0.0559	0.6236	0.7495
P47755	CAPZA2	-0.1016	0.1959	0.432
O75746	SLC25A12	0.2432	0.0098	1.2497
P09661	SNRPA1	-0.055	0.0365	0.3739
Q9Y4Z0	4	0.2424	0.2003	1.0755
Q5SXM2	SNAPC4	0.0572	0.1689	0.3889
Q92879-4	CELF1	0.0845	0.9616	0.0341
Q9Y241	HIGD1A;HIGD1C	0.4299	1.0356	1.858
E9PB61	ALYREF	-0.3448	1.701	0.4698
P23786	CPT2	0.0488	0.1463	0.1895
Q96AE7	TTC17	0.4122	1.2451	1.0133
Q7Z7K0	CMC1	0.213	0.1727	0.7317
Q13619	CUL4A	0.2125	0.9068	1.2577
Q13547	HDAC1	-0.0772	0.1326	0.397
Q96S97	MYADM	0.1805	2.8435	0.4432
P30084	ECHS1	0.211	1.9333	0.1539
Q8N3U4	STAG2	-0.1018	0.3434	1.2753
P25440	BRD2	-0.6239	0.5892	2.7117
O95433	AHSA1	0.2016	1.1777	0.7563
P49674	CSNK1E;CSNK1D	-0.509	1.4147	1.1738
Q92834-6	RPGR	-2.5257	10.7569	2.8881
O75947	ATP5H	0.2257	1.1221	0.7208
P60866	RPS20	-0.0076	0.4426	0.4692
P22392-2	NME2;NME1-NME2;NME1	-0.1017	0.6269	0.0701
Q9NQT4	EXOSC5	-0.2606	0.5772	0.4158
P04844	RPN2	-0.0795	0.1762	0.492
P52948	NUP98	-0.2405	0.9935	1.1917
E7ESM9	CAST	-0.2443	0.4088	2.1047
H0YFZ4	INPPL1	-0.0881	0.5364	1.0769
Q8NE01	CNNM3	-0.3195	0.83	0.3043
Q15067-2	ACOX1	0.135	0.7044	0.1153
Q9C0D3	ZYG11B	0.34	0.7497	0.7146
Q9H2G2-2	SLK	-0.0594	0.5308	1.0781
Q99426	TBCB	-0.0564	1.7473	1.1533
Q96BH1	RNF25	-0.4743	1.7311	3.0566
Q96K76	USP47	0.1067	2.3466	0.6873
P51531-2	SMARCA2	-0.2986	0.8739	0.699
Q9NVR2	INTS10	-0.1607	0.4818	0.0531
Q969Z0	TBRG4	-0.066	0.356	0.04
Q6I9Y2	THOC7	-0.094	0.926	0.1921
Q03013	GSTM4	0.4938	4.2895	0.0434
P15104	GLUL	-0.2874	0.2927	4.241
P42694	HELZ	-0.3691	0.6359	4.6101
Q8WXG6	MADD	0.6779	2.37	2.5687
P54707	ATP12A	-0.3223	0.591	1.8765
Q92733	PRCC	0.238	2.2421	0.143
Q8TD16	BICD2	0.1572	0.1872	1.0576
Q8IWZ3	ANKHD1	-0.0422	0.4467	0.1244
P84101	SERF2	-0.3313	0.9119	0.8716
Q9HBK9	AS3MT	-3.2577	2.8385	3.4907
Q8N5S9	CAMKK1	-0.4055	0.03	0.01
Q96BK5	PINX1;SOX7	-0.1525	1.3447	0.5368
Q9H479	FN3K	0.192	0.0785	1.0196
O75935	DCTN3	-0.2603	0.6754	1.3806
Q9BRQ8	AIFM2	-0.0592	0.4922	1.4388
Q14CX7	NAA25	0.0801	0.0012	0.7218
P62195	PSMC5	0.026	0.0361	0.2606
Q9NX58	LYAR	-0.0903	0.7085	0.0131
P11182	DBT	0.5098	2.5896	1.2841
J3KNF8	CYB5B	-0.3312	0.4778	1.8886
O95782	AP2A1	-0.055	0.1226	0.5343
Q9NYF8	BCLAF1	0.0582	0.3958	0.0605
P32780	GTF2H1	0.2177	0.0799	1.403
Q99943	AGPAT1	0.0581	0.2716	0.6752
O95139	NDUFB6	0.1186	0.5013	0.3397
Q86UV5	USP48	0.1543	1.197	0.2614
P06396-2	GSN	0.4941	1.7409	5.1005
P23921	RRM1	-0.2867	0.9607	2.0765
Q9UJ70	NAGK	1.4956	4.6491	5.7353
O14737	PDCD5	0.2046	0.5074	0.8535
P21953	BCKDHB	0.2369	0.6115	0.4619
P45877	PPIC	0.2029	0.1686	1.2901
P08727	KRT19	0.5102	2.1086	3.421
O95825	CRYZL1	0.4192	1.1754	2.3418
P28331	NDUFS1	0.2013	0.1564	2.1385
O00264	PGRMC1	-0.3318	4.7275	0.7891
Q7Z7F7	MRPL55	0.279	0.4409	0.5631
O95218	ZRANB2	0.4101	2.3853	2.4754
Q96EU6	RRP36	0.7917	1.6402	2.532
P51452	DUSP3	-0.0175	0.2456	0.5462
Q7L0Y3	TRMT10C	0.0152	0.0113	0.1423
Q04446	GBE1	0.1891	0.3402	2.3582
Q93052	LPP	-0.7161	3.2723	3.0938
Q96IJ6	GMPPA	0.2068	0.493	1.1652
Q14331	FRG1	-0.0796	0.7353	0.0046
F5H2X7	CIZ1	0.5391	2.5368	0.5754
P49458	SRP9	-0.2671	1.3159	0.2928
O94817	ATG12	0.0533	1.3982	1.057
Q02539	HIST1H1A	0.2243	1.1674	0.0491
Q9NU22	MDN1	-0.0736	0.3743	0.0852
Q8N6R0	METTL13	0.0841	0.181	0.828
P07237	P4HB	-0.0467	0.9385	0.3342
Q53H96	PYCRL	0.4443	0.3092	1.7899
Q9UNF1	MAGED2	-0.1254	0.9205	0.2761
Q9BRZ2	TRIM56	0.5815	2.4061	0.3948
P09211	GSTP1	0.1789	0.7766	1.1272
P49917	LIG4	0.7426	1.1915	3.7654
P60981	DSTN	-0.2707	1.4743	1.0542
P29401	TKT	0.177	1.9694	0.3132
A1L0T0	ILVBL	-0.007	0.336	0.2563
Q9BVM2	DPCD	0.0999	0.1798	0.3285
P24752	ACAT1	0.4913	3.3498	2.5032
P13987	CD59	-0.1688	1.0622	0.2665
Q15058	KIF14	-0.8813	1.7241	3.2565
Q9H269	VPS16	0.4136	0.9451	1.3384
P18827	SDC1	-1.8876	4.8816	5.2274
Q8N5A5	ZGPAT	0.6433	3.3184	2.3977
Q86X76-2	NIT1	0.0774	0.2029	0.5131
Q53EP0	FNDC3B	-0.0928	0.1153	0.6524
Q9UBW7	ZMYM2	-1.002	1.5412	0.915
Q96NC0	ZMAT2	-0.2416	0.6382	0.3734
Q6YHU6	THADA	0.2282	2.5194	1.8182
P07339	CTSD	0.5224	4.8064	0.7683
Q9NQW7	XPNPEP1	0.4229	1.9863	2.2371
Q92581-2	SLC9A6	-0.3561	1.5948	1.846
Q96EK9	KTI12	0.015	0.3442	0.5076
P17931	LGALS3	0.2902	1.7469	0.4141
Q96K37	SLC35E1	0.8344	3.3466	2.319
Q9C0B1	FTO	0.0255	0.0565	0.0408
Q9H3K6	BOLA2	0.197	0.3019	1.1298
Q8IXQ4	GPALPP1	-0.4444	1.5682	0.8423
O75792	RNASEH2A	0.2434	0.1823	2.3534
P18621	RPL17	0.0563	0.5954	1.3292
P62877	RBX1	0.1294	0.3965	0.3226
Q5T1V6	DDX59	0.0039	0.279	0.1087
Q8N5M9	JAGN1	-0.2259	0.2741	0.8079
P62306	SNRPF	-0.0019	0.272	0.0655
P52895	AKR1C2	0.2983	1.4584	0.245
Q9Y3E1	HDGFRP3	-0.7818	5.6234	0.4516
P62829	RPL23	0.0945	0.1491	0.9849
Q9P013	CWC15	0.1036	0.1293	0.8307
Q587I9	SFT2D3	0.7805	2.6635	1.8649
Q92599	SEPT8	0.1883	1.6634	0.2646
P30049	ATP5D	-0.2289	0.6216	1.0174
O75150	RNF40	-0.1358	0.0287	0.9451
Q13795	ARFRP1	0.3664	3.4092	0.1006
P42695	NCAPD3	-0.2536	0.1494	1.7873
Q14160	SCRIB	0.1003	0.424	1.6403
Q8IV08	PLD3	0.5832	1.1412	2.2892
P33240	CSTF2	0.02	0.5283	0.9331
Q9UGY1	NOL12	-0.3973	2.2538	0.0218
P18887	XRCC1;FOXH1	-0.0073	0.5242	0.4335
P30260	CDC27	-0.2114	0.6795	0.8661
K7EJH8	ACTN4	-1.0632	7.9733	1.5509
O75475	PSIP1	-0.1818	0.1795	2.3761
Q01081	U2AF1;U2AF1L4	0.1001	0.1314	0.682
Q9UJU6	DBNL	0.2266	2.0266	0.1248
P61225	RAP2B	0.3553	1.4063	1.1724
Q9UJW0	DCTN4	-0.1365	1.465	0.253
P46020	PHKA1	0.5907	0.1854	5.3212
P60510	PPP4C	0.0171	0.3419	0.1566
Q9NXF1	TEX10	0.5283	0.9319	2.2716
Q93034	CUL5	0.1653	0.2056	0.7114
Q5T8P6-2	RBM26	0.3046	0.8231	1.5195
P10301	RRAS	-0.0062	0.1419	0.1418
Q05639	EEF1A2	-0.5293	0.0441	1.8574
Q8TEX9	IPO4	0.0973	0.5165	1.5832
Q9Y617	PSAT1	0.2715	0.319	2.0882
O75179	ANKRD17	0.173	0.8526	0.1519
Q9H974	QTRTD1	0.0383	0.1388	0.059
Q14997	PSME4	0.263	1.1087	0.4693
O60499	STX10	-0.5343	1.6174	0.3869
Q9UHB6	LIMA1;TRMT1	0.2119	2.0313	0.1545
Q92530	PSMF1	-0.5382	0.944	1.9297
P00533	EGFR	-0.3436	0.0322	4.0932
Q76FK4	NOL8	-0.1663	1.2744	0.0576
Q13620-1	CUL4B	-0.0193	0.274	0.1172
Q9BXW9	FANCD2	-0.9681	2.3494	3.047
P22794-2	EVI2A	0.5341	0.5955	1.2587
Q3V6T2	CCDC88A	-0.2062	0.4238	1.7298
P34741	SDC2	0.7853	1.7718	4.6762
Q6P2C8	MED27	-0.1645	0.6576	0.0845
Q86Y37	CACUL1	-1.0301	4.7066	5.2381
Q658P3	STEAP3	-0.2	0.994	0.1827
Q9BQS8	FYCO1	0.4622	0.9184	0.9353
Q96JG6	CCDC132;DKFZp313I2429	-0.4654	2.5912	0.3378
Q08170	SRSF4	0.7069	1.5704	4.4252
P41223	BUD31	-0.2873	0.7935	0.9772
O75396	SEC22B	-0.6052	0.3277	7.1991
Q9P260	KIAA1468	0.5143	0.4963	1.8067
Q13435	SF3B2	0.0644	0.2553	0.2702
O95197-3	RTN3	1.8814	4.8445	2.963
P18564	ITGB6	-0.2685	0.4442	2.3223
Q14139	UBE4A	-0.0544	0.7413	0.8521
P04062	GBA	-0.2403	1.3929	0.5021
O14672	ADAM10	0.1414	0.6957	0.1288
O95831	AIFM1	0.225	1.3754	0.9484
Q9H900	ZWILCH	0.1541	0.6566	0.0285
Q96EN8	MOCOS	0.5866	2.9603	0.8245
Q9Y6G3	MRPL42	0.4418	0.6786	1.9633
Q58FF6	HSP90AB4P	-0.3555	1.3068	0.5719
Q92597	NDRG1	0.756	2.5889	1.7691
Q9UQN3	CHMP2B	-0.2531	0.7322	0.4681
Q9P032	NDUFAF4	0.3621	1.1537	1.2374
Q9NX40	OCIAD1	0.2899	0.7861	2.3259
Q99729-3	HNRNPAB	-0.4079	0.0875	4.0788
O15078	CEP290	-0.631	2.5165	2.2144
Q96Q15	SMG1	-0.1316	0.3365	0.8154
Q01664	TFAP4	-0.8684	1.5358	0.4254
P62333	PSMC6	-0.1371	0.9458	0.1643
Q9H7E9	C8orf33	0.2357	0.5444	0.8969
Q12765	SCRN1	-0.1878	0.4549	0.9447
Q9Y3C4	TPRKB	-0.2345	0.8345	0.282
P13693	TPT1	-0.0521	0.3191	0.0658
E9PEZ7	ABI2	-0.5403	1.5602	2.3012
Q9UHX1-6	PUF60	-0.0109	0.0795	0.174
Q14919	DRAP1	-0.1238	0.3103	0.2517
O95684	FGFR1OP	-0.0607	0.7496	0.5474
Q14258	TRIM25	0.0382	0.5015	0.8547
P48556	PSMD8	-0.542	2.3943	0.8524
P23919	DTYMK	-0.1572	0.2371	1.2333
Q15149-2	PLEC	-0.4119	2.0158	0.481
P52630	STAT2	-0.269	0.3509	0.6604
P55795	HNRNPH2	0.0108	0.3254	0.4395
Q9HAV4	XPO5	-0.338	3.5192	0.1369
P26440	IVD	0.4094	2.0706	1.1293
O75694	NUP155	-0.4198	3.4174	1.6743
Q13564	NAE1	0.0321	0.7101	1.0943
P61019	RAB2A	0.1174	0.126	1.1574
P23434	GCSH	-0.2449	1.1758	0.4594
C9J2U4	TAMM41	-0.1408	2.0486	0.7016
P01116	KRAS	-0.3201	0.1919	1.2903
P18085	ARF4	0.0711	0.3472	0.7651
Q13616	CUL1	-0.3827	1.2586	0.7666
A0PJW6	TMEM223	-1.1596	2.9722	0.2763
P29992	GNA11	-0.3979	1.4147	0.5217
A6NHL2	TUBAL3	-0.9996	3.8723	0.9137
Q9Y3E7	CHMP3	0.457	0.5263	1.3199
Q13418	ILK	-0.5879	2.8979	3.8472
Q8NFQ8	TOR1AIP2	0.0554	1.37	0.8923
Q06124	PTPN11	0.2659	2.6448	0.2033
Q9NP64	ZCCHC17	0.1371	0.1653	0.8887
Q92922	SMARCC1	-0.1477	1.5339	0.1061
P00918	CA2	-0.1024	0.1089	0.3362
Q8WVC0	LEO1	0.0315	0.5434	0.914
P07814	EPRS	0.1436	1.3949	0.2934
Q14108	SCARB2	0.0621	0.1057	0.3349
O95299	NDUFA10	0.3196	0.4533	1.1403
Q5QPA5	MRPS18A	0.3242	0.3641	0.8629
Q9NUU7	DDX19A	0.1271	0.5957	0.5115
O75884	RBBP9	0.1343	0.5722	1.7598
Q02218	OGDH	0.1482	1.8499	0.0436
Q14249	ENDOG	0.5815	0.1089	5.0434
Q96GW9	MARS2	0.2047	0.2316	1.3308
P62310	3	-0.1783	1.1806	0.1385
P16591	FER	0.4285	1.6221	0.1916
Q6P1L8	MRPL14	0.0633	0.5036	0.0377
Q9BUR4	WRAP53	-0.0129	0.6027	0.397
P19474	TRIM21	0.8435	4.8145	0.0986
E9PQI3	GML	-0.6105	2.0518	0.9726
O43709	WBSCR22	0.1754	0.0945	1.1422
Q9BV86	NTMT1	-0.1935	1.1164	0.0324
P68104	EEF1A1;EEF1A1P5	0.0711	0.4494	0.1224
Q96RT1	ERBB2IP	-0.6623	1.1232	0.1947
Q96GM8	TOE1	0.6607	1.459	2.0834
O43264	ZW10	0.2147	1.0026	0.3137
Q9H5Q4	TFB2M	0.1921	0.2034	1.6234
Q969N2	PIGT	0.0945	0.1567	0.9466
Q9UKV8	AGO2	-0.3211	1.5964	1.4935
Q9Y244	POMP	0.6542	4.4149	0.0863
Q6PK04	CCDC137	0.3683	0.7838	0.818
Q53FT3	C11orf73	-0.0629	0.312	0.1407
P18077	RPL35A	0.0151	0.3103	0.4424
P37837	TALDO1	0.2754	1.1256	1.8101
Q9NZQ3	NCKIPSD	-0.995	1.4948	0.0084
Q96T58	SPEN	-0.9217	0.7645	2.5906
P14324	FDPS	-0.0859	0.2406	0.4198
O95466	FMNL1	0.1402	0.6541	0.5141
P60900	PSMA6	-0.2765	1.9227	0.6717
Q96T51	RUFY1	0.2902	2.1977	0.3216
Q7Z4H7	HAUS6	-0.8277	1.4488	2.5382
O95707	POP4	0.5758	0.921	1.9471
Q6UUV7	CRTC3	-0.5624	0.8784	2.2892
Q13123	IK	-0.1755	0.3015	0.9626
Q4J6C6	PREPL	0.2304	0.5486	0.6893
P13928	ANXA8;ANXA8L1	-0.0147	0.41	0.4631
Q08AM6	VAC14	0.4098	0.575	1.7148
Q86VX2	COMMD7	0.1098	1.1889	0.3572
Q14966	ZNF638	0.2781	0.5378	0.5535
Q9Y3P9	RABGAP1	-0.0672	3.2489	1.7525
P0C0S5	H2AFZ;H2AFV	-0.0978	0.3065	1.024
A6NHT5	HMX3	0.4748	1.1791	2.0373
P98175	RBM10	0.27	0.6502	0.9411
P40763-2	STAT3	0.3972	1.8214	0.95
A6NIH7	UNC119B	0.2452	0.6489	1.2282
P30876	POLR2B	-0.0672	0.1386	0.1934
O75448	MED24	-0.9274	5.7949	1.8303
P78310	CXADR	-0.2541	0.1606	0.3688
Q9NZ32	ACTR10	-0.1257	0.3348	0.4134
O15212	PFDN6	-0.0529	0.1674	0.1046
Q96FX7	TRMT61A	-0.1048	0.2148	0.6919
P61224	RAP1B	-0.0086	0.4284	0.4202
Q9UIC8	LCMT1	-0.1238	0.6196	0.1353
P55265	ADAR	-0.1024	0.0763	0.8566
Q9UJY5	GGA1	0.7319	3.3783	1.3878
Q99549	MPHOSPH8	0.1373	0.3912	0.7862
Q8NBF2	NHLRC2	-0.7379	0.866	2.3228
Q14019	COTL1	-0.4867	2.2703	1.1822
P22570	FDXR	1.108	3.7642	5.0914
Q15126	PMVK	-0.2074	1.0502	0.7612
Q5JSH3	WDR44	0.3791	1.5771	1.2843
Q5JPH6	EARS2	0.1131	0.4231	0.4014
P10909	CLU	0.08	0.8751	0.2142
P11233	RALA	-0.0009	0.203	0.0764
P21281	ATP6V1B2	0.1232	0.7401	0.1566
Q96T60	PNKP	0.3535	1.024	0.5486
Q9BRJ7	NUDT16L1	0.1404	0.2579	0.5665
Q96HE7	ERO1L	-0.1716	0.1822	1.8837
Q7L2E3-2	DHX30	0.0551	0.2449	0.1776
Q5UCC4	EMC10	-0.1168	0.7782	0.0415
Q92804	TAF15	0.067	0.2256	0.2346
Q6PIU2	NCEH1	-2.0191	2.4166	9.5769
Q9H0S4	DDX47	-0.3739	1.8942	1.7756
Q9NPA3	MID1IP1	0.3598	0.7192	0.7676
O94901	SUN1;UNC84A	-0.2853	0.1071	2.0038
Q9BSV6	TSEN34	-0.0622	0.8207	0.8859
K7EMS3	KRT19	-0.3832	1.8091	0.5241
Q3ZCW2	LGALSL	0.1619	0.2038	0.5392
Q9BUR5	APOO	1.0137	2.7497	2.3134
P62072	TIMM10	0.1661	0.7372	0.4067
O15400	STX7	0.3868	1.3084	1.5045
P00367	GLUD1;GLUD2	-0.0817	0.8606	0.0669
O75534	CSDE1	-0.326	2.1635	1.3121
P53396	ACLY	-0.0069	0.1777	0.2212
Q9UBW8	COPS7A	-0.2706	0.8186	0.2632
Q9NRR5	UBQLN4	-0.3158	0.7147	1.4812
P26447	S100A4	0.1336	0.2503	0.5168
Q567U6	CCDC93	-0.6848	0.339	1.814
Q93079	HIST1H2BH;HIST1H2BM;HIST1H2BN;HIST2H2BF;HIST1H2BD;HIST1H2BK;HIST1H2BC;H2BFS	-0.1285	0.6445	0.3654
P57772	EEFSEC	0.096	0.7252	0.002
Q53EL6	PDCD4	0.2177	3.2575	0.6731
Q53HC9	TSSC1	-0.3711	0.6372	0.0958
Q96P16	RPRD1A	0.1073	0.0534	1.2163
Q8WZ42-12	TTN	-0.4976	0.5441	2.6328
O95340	PAPSS2	0.858	2.1414	1.1672
Q9H6Q4	NARFL	-0.3684	0.3663	1.4543
P25788	PSMA3	0.0513	0.0886	0.4559
Q13158	FADD	0.5793	1.9082	1.6006
Q9UBS8	RNF14	0.765	1.1433	2.23
Q14118	DAG1	-0.6756	2.9087	3.3761
Q6PIJ6	FBXO38	-0.1691	0.0474	0.4967
Q7KZI7	MARK2	0.0739	1.2864	0.427
Q16647	PTGIS	-0.9578	3.4627	0.4839
O75976	CPD	-0.9831	2.835	1.7243
Q9UNH6	SNX7	-0.0451	0.0312	0.111
P54886	ALDH18A1	0.1432	0.8263	0.8604
P49721	PSMB2	-0.378	2.0412	0.3542
O75608	LYPLA1	0.2048	0.3911	0.9813
P23193	TCEA1	0.0643	1.6155	0.6314
Q9UNE7	STUB1	0.2618	1.446	0.8627
Q96DV4	MRPL38	-0.2632	1.1944	0.9448
Q9Y4P3	TBL2	0.1183	1.2274	0.0079
O14979-3	HNRNPDL	-0.1955	1.8015	0.0754
Q96G46	DUS3L	0.4746	1.5099	0.7274
Q15125	EBP	-0.2133	0.664	0.0348
P51608-2	MECP2	-0.0557	0.0838	0.0294
Q13601	KRR1	-0.1033	0.9193	0.1779
P29692-3	EEF1D	0.1363	0.3357	1.9172
B1ALY0	PALM2-AKAP2;PALM2	-1.657	3.286	9.4393
Q9H4G4	GLIPR2	-0.1874	2.7658	0.6745
Q9BQ67	GRWD1	0.2833	0.4504	0.8062
Q13162	PRDX4	0.0412	0.0421	0.3705
Q9BYG3	NIFK	-0.1077	1.3699	0.4349
Q69YN2	CWF19L1	0.001	0.0991	0.0284
P36551	CPOX	0.2809	3.5355	0.0792
A6NHU4	AKR1C1	-0.0326	0.2064	0.0056
Q9NT62	ATG3	0.0896	0.6414	0.1288
Q9Y3D2	MSRB2	0.5516	2.7807	0.4865
O14757	CHEK1	-0.0574	0.0868	0.2186
P07737	PFN1	0.0106	0.2631	0.1408
P48047	ATP5O	0.1118	0.6498	0.311
P16278	GLB1	-0.1292	1.3446	0.1302
Q96EQ0	SGTB	-0.004	0.0526	0.0569
P61966	AP1S1	-0.2893	0.5652	0.9272
Q92990	GLMN	-0.2011	0.4304	0.0376
P63010	AP2B1	0.0135	0.1966	0.0586
O75352	MPDU1	-0.0755	0.8586	0.0887
Q99832	CCT7	0.0846	0.1402	0.6594
Q13242	SRSF9	0.0662	0.026	0.4212
P55210	CASP7	0.3328	0.7777	0.5922
Q14697	GANAB	-0.1996	0.9816	0.8241
O75170	PPP6R2	-0.1516	0.1079	0.7459
P33316	DUT	0.6469	3.3268	2.6987
Q5SNT2	TMEM201	-0.439	0.4337	1.4901
P16615	ATP2A2	0.0275	0.7558	0.4242
Q9Y333	2	0.3801	0.2913	2.1841
O14976	GAK	0.1971	0.9204	0.0574
P04792	HSPB1	0.1012	1.7004	0.493
Q96QT4	TRPM7	-0.4567	1.8442	0.7159
Q8N726	CDKN2A	-1.4931	4.1457	0.9492
Q53EZ4	CEP55	0.139	2.0518	0.7354
Q9NXH9	TRMT1;SEMA4B	0.2195	0.7658	0.2173
Q13573	SNW1	0.2263	1.5364	0.2558
P13073	COX4I1	-0.1116	0.1659	0.473
O60547	GMDS	-0.2757	1.2808	0.6967
Q8N6T3	ARFGAP1	0.0126	0.5384	0.3577
P06733	ENO1	-0.0384	0	0.3511
P57076	C21orf59	-0.2928	2.4059	0.2645
Q9NP61	ARFGAP3	-0.6048	0.5843	1.294
Q15172	PPP2R5A	0.4657	0.3099	1.8919
P23634	ATP2B4	-0.0284	0.8012	0.9746
Q9Y508	RNF114	-0.5597	0.2758	0.2152
Q9P227	ARHGAP23	0.3738	0.8134	0.9834
Q32P41	TRMT5	-0.0498	0.0344	0.0372
Q5T160	RARS2	0.4029	1.2791	2.0533
Q7L311	ARMCX2	0.1001	0.5013	0.147
P41247	PNPLA4	0.7902	3.3059	3.5472
Q12846	STX4	-0.1757	0.0717	0.8039
Q9UKU7	ACAD8	0.2364	0.5127	0.4472
Q9Y2Q5	LAMTOR2	1.0504	1.4597	1.7284
O15305	PMM2	0.1998	0.4088	0.6755
P46060	RANGAP1	-0.2386	1.5067	1.2207
P08621	SNRNP70	-0.0732	0.5724	0.0247
Q8TF68	ZNF384	0.2645	1.2727	0.7248
P30038	ALDH4A1	0.3211	1.3245	0.6897
Q9H3P7	ACBD3	0.6342	2.577	2.9742
P53004	BLVRA	0.005	0.2424	0.2217
P17096	HMGA1	0.0164	0.0091	0.0976
Q16740	CLPP	0.2764	0.732	1.0502
P60002	ELOF1	-0.0747	0.136	0.6336
Q9UKK3	PARP4	0.7338	2.709	1.7776
P51398	DAP3	0.1033	0.6312	0.0349
Q9H098	FAM107B	-0.402	1.9022	0.9242
Q03426	MVK	0.3372	2.5383	0.211
Q9BWM7	SFXN3	0.2256	0.5893	0.8927
O95983	MBD3	0.06	0.4449	0.9719
P12270	TPR	-0.2423	1.3002	1.1986
P24386	CHM	-0.0294	0.4911	0.2025
Q8WTV0-2	SCARB1	-0.1185	0.5723	0.2973
P00387	CYB5R3	-0.0626	0.2086	0.9394
Q7Z5J4	RAI1	-0.6354	1.8049	0.7864
P31751	AKT2	-0.7149	5.3054	0.3745
Q5BKZ1	ZNF326	0.1535	0.1423	1.0002
P54289	CACNA2D1	0.542	0.9297	0.9952
O15355	PPM1G	0.1284	0.4152	0.7967
Q9NWY4	C4orf27	0.2157	0.0581	1.4704
E7EUT4	GAPDH	0.049	0.1615	0.0357
Q02241	KIF23	-0.2211	0.2395	2.2426
Q9BZI7	UPF3B	0.1722	0.1841	1.126
O15143	ARPC1B	0.1908	1.5382	0.0181
Q06330	RBPJ	0.1643	0.3501	1.3505
Q9P2E9	RRBP1	-6.1219	8.7727	17.287
P30405	PPIF	0.037	0.8535	0.4055
Q9H1X3-3	GNG10	-0.685	1.6146	1.1056
P57740	NUP107	-0.3585	1.4796	2.7449
O14562	UBFD1	0.2868	0.4426	2.0463
Q92696	RABGGTA	0.7345	2.1241	1.2042
F5H1X8	LRBA	0.226	0.3345	1.313
P17174	GOT1	0.2665	1.9502	1.0107
Q9BWS9	CHID1	0.3765	0.041	1.964
P78536	ADAM17	0.4448	0.9279	1.8841
P60059	SEC61G	0.1794	0.607	1.0703
Q9Y448	KNSTRN	0.1456	1.586	0.2833
P11498	PC	0.2877	2.6927	0.5447
Q969S9	GFM2	0.5213	1.4023	1.2901
P25098	ADRBK1;ADRBK2	0.1869	0.4439	0.5057
Q14694	USP10	-0.1996	1.7042	0.3098
Q9UHB9	SRP68	-0.3402	4.7253	0.4823
O00399	DCTN6	-0.2157	1.1321	2.2471
Q6UX04	CWC27	0.0194	0.3732	0.5362
Q00059	TFAM	-0.1739	0.5131	1.9174
Q15797	SMAD1;SMAD5	-0.9125	5.2222	1.6854
P54132	BLM	-0.0351	0.5208	1.0571
H0YIS9	PFKM	-0.2974	1.518	0.174
O43324	EEF1E1;EEF1E1-BLOC1S5	-0.0208	1.0564	0.9876
Q86WQ0	NR2C2AP	0.4027	0.876	1.3136
P18754	RCC1	0.5226	1.1761	2.2104
Q6PCB5	RSBN1L	0.5718	2.5495	3.0068
P09496-2	CLTA	0.1264	0.4698	0.3454
P07948	LYN	-0.4763	1.2891	0.1329
O14980	XPO1	-0.0304	1.3071	0.687
Q9NP79	VTA1	0.0046	0.3156	0.2215
P78527	PRKDC	-0.0832	1.382	0.2046
Q6UWN8	SPINK6	0.3412	0.7107	1.3276
Q96GA3	LTV1	0.384	2.1009	0.9909
P31327	CPS1	0.6372	4.3695	3.5817
Q969Q0	RPL36AL	0.1392	0.1822	1.0958
Q9Y2H6	FNDC3A	0.644	4.779	1.8832
Q96GE9-2	TMEM261	0.0096	0.0423	0.1508
Q96B01	RAD51AP1	0.0605	0.2343	0.2216
Q13724	MOGS	0.09	0.0553	0.4739
Q96ND0	FAM210A	0.2485	0.7827	0.4432
P11171	EPB41	-0.1008	0.7216	2.4828
Q9NRF9	POLE3	0.1674	0.8683	0.3697
Q96JI7	SPG11	1.3125	3.5401	3.1918
Q12972	PPP1R8	0.0965	0.009	0.8085
I3L0A4	WASH6P;WASH3P;WASH2P;WASH1;WASH4P	-0.1721	1.1571	0.4364
O00267	SUPT5H	0.1185	0.0472	1.2169
Q16513	PKN2	0.0645	0.2773	0.3267
Q9BUK6	MSTO1	0.6619	0.9603	1.7197
O00487	PSMD14	0.118	0.7417	0.1635
Q99653	CHP1	-0.0844	0.1596	0.481
P08779	KRT16	-1.4627	4.6143	0.8459
Q9BT73	PSMG3	0.1562	0.069	0.8236
Q13425	SNTB2	-0.4605	2.5945	0.2804
P22314	UBA1	0.047	0.1462	0.2314
Q9BW92	TARS2	-0.2385	0.4877	1.5502
Q9UKM9	RALY	0.13	0.7218	0.1595
Q12986	NFX1	0.1525	1.3663	0.4027
Q7Z6B0	CCDC91	-0.8175	2.0836	2.0159
O14744	PRMT5	-0.0003	0.4308	0.402
Q9Y6K9	IKBKG	0.0328	0.3835	0.5961
Q8N983	MRPL43	-0.0707	0.7162	0.0179
P82914	MRPS15	0.1767	0.0987	1.0788
Q9BV38	WDR18	-0.1358	1.1264	0.2511
P56182	RRP1	0.2513	0.7087	1.1562
P78395	PRAME	-0.3336	1.3733	1.4951
P46087	NOP2	0.095	0.2579	0.5031
P55854	SUMO3;SUMO2	-0.472	3.8776	1.2855
Q14839	CHD4	-0.1557	0.5412	0.7695
O76094-2	SRP72	-1.5069	1.3614	0.3583
O00151	PDLIM1	0.0055	0.1352	0.143
Q99829	CPNE1	-0.3953	0.8998	3.0379
Q9UBI6	GNG12	-0.1106	0.6976	0.0148
Q96I24	FUBP3	0.0501	2.2822	1.4028
Q96DT5	DNAH11	0.3686	1.6852	0.8236
P32970	CD70	0.8888	0.965	3.4417
Q92522	H1FX	-0.1313	0.543	0.2248
Q9UG63	ABCF2	-0.1978	0.4493	1.6263
Q58FF8	HSP90AB2P	0.4552	1.6449	0.4266
Q8TCT8	SPPL2A	0.1322	0.3748	1.2091
Q13415	ORC1	0.2697	0.7399	0.8466
P82909	MRPS36	0.1601	1.1303	0.3207
Q96SY0	VWA9	0.1401	0.2653	1.1835
Q9UQ90	SPG7	0.3382	0.1004	2.7564
Q15758	SLC1A5	-0.1376	1.455	0.3069
Q6IBW4	NCAPH2	0.1472	1.0163	0.6162
P62314	SNRPD1	0.1989	0.5171	0.6822
Q9UBS0	RPS6KB2	-0.4765	1.0854	5.9896
Q6P2Q9	PRPF8	-0.0882	0.9309	0.0194
P16035	TIMP2	-0.1037	0.4458	0.5457
P25325	MPST	0.1953	0.1932	1.6438
Q9NQH7	XPNPEP3	0.1853	0.7023	0.0831
Q01105-2	SET	-0.3145	2.4331	0.3808
P62854	RPS26;RPS26P11	0.2243	0.8703	0.8572
Q14BN4	SLMAP	-0.2203	1.1589	0.5194
Q8N4V1	MMGT1	0.1947	0.9235	0.0621
Q7L1Q6	BZW1	0.052	0.3114	0.1416
Q10469	MGAT2	0.112	0.384	0.1566
P49643	PRIM2	-0.4456	3.1265	0.9272
P28066	PSMA5	0.1471	0.5591	0.8166
Q8NI35	INADL	-1.4004	3.3099	3.777
Q9BPX6	MICU1	0.0689	0.0561	0.1776
Q9Y2D4	EXOC6B	-0.5527	1.7918	1.3043
Q9NZD2	GLTP	-0.1007	0.1536	0.2895
Q9Y5A9	YTHDF2	0.0892	0.5175	0.0361
Q8N122	RPTOR	0.0158	0.8581	0.7227
P15954	COX7C	-0.6796	0.3537	0.8216
Q96RE7	NACC1	-0.1459	0.2216	0.5952
P56192	MARS	0.1357	0.2579	0.9039
P29966	MARCKS	-0.4181	1.8622	2.5391
Q6ZRP7	QSOX2	0.0671	3.2299	1.627
Q9Y6A9	SPCS1	-0.1057	0.4768	0.1892
Q8N668	COMMD1	0.7971	2.0162	3.0152
O96005	CLPTM1	-0.4246	1.8579	1.37
Q9H4L7	SMARCAD1	-0.452	3.9946	0.1729
O14773	TPP1	-0.4834	0.7927	0.5633
Q9UHL4	DPP7	0.2273	0.5175	0.1337
P30508	HLA-C	-0.4556	2.7423	1.6513
P37840	SNCA	0.3568	2.0778	0.4697
Q96FV9	THOC1	0.2139	0.7675	0.8943
P15170-2	GSPT1	-0.1339	0.0172	0.9874
Q9Y315	DERA	1.0551	4.2677	3.5209
Q70UQ0-4	IKBIP	-0.1974	0.8232	0.4206
Q9Y4A5	TRRAP	-0.2264	0.4012	0.3903
Q9BRA2	TXNDC17	0.1451	0.8377	2.3849
O75934	BCAS2	0.1795	0.0688	2.2484
P16989	YBX3	0.0034	0.3556	0.285
Q9BVC6	TMEM109	-0.3147	1.7239	0.3411
Q9NNW7	TXNRD2	0.5834	2.3937	0.4153
P30153	PPP2R1A	-0.1236	0.915	0.2473
Q15286	RAB35	0.2036	0.6838	0.3497
P84085	ARF5	-0.1104	0.1715	0.6335
Q96A72	MAGOHB	0.074	0.0758	0.507
P02792	FTL	0.5233	0.7958	3.5731
Q5SRE5	NUP188	0.0395	0.1394	0.0989
Q5T8I3	FAM102B	0.1644	1.1409	0.1962
Q53GQ0	HSD17B12	-0.1366	0.4547	1.4872
P28838	LAP3	0.0435	1.1293	1.4723
Q96QK1	VPS35	-0.5785	5.2188	2.5657
P31942	HNRNPH3	0.1116	0.0439	1.2968
O00712	NFIB	0.2567	0.7435	0.9538
Q8NE86	MCU	-0.5646	0.9642	1.4295
Q96EL2	MRPS24	0.6477	2.4283	3.2833
Q5VZL5	ZMYM4	0.3683	0.2054	1.1747
O94763	URI1	0.6154	1.0658	1.2399
Q9C0F1	CEP44	-0.442	1.08	0.2491
Q96RL7	VPS13A	0.3961	0.7858	1.9932
O95292	VAPB	0.2075	0.8121	0.965
Q6NYC8	PPP1R18	-0.0818	0.261	0.7749
Q14789	GOLGB1	0.0708	0.0298	0.6235
Q7L7L0	HIST3H2A;HIST1H2AB;HIST1H2AD	0.8008	1.1492	2.8832
Q96G03	PGM2	-0.1676	0.7272	0.2684
Q9H2D6	TRIOBP	0.889	1.7564	1.3864
P52434	POLR2H	-0.6424	4.1508	1.8028
Q6P4R8	NFRKB	-0.6149	0.4587	0.5476
P08047	SP1	-0.5046	0.5447	0.94
P78406	RAE1	-0.0144	0.1631	0.0539
O15173	PGRMC2	-0.0654	0.6624	0.2295
Q9Y2W1	THRAP3	0.2402	0.4421	1.9268
K7ELL7	PRKCSH	0.0292	0.3487	0.6353
Q86XP3	DDX42	0.1259	1.0444	0.1595
Q09161	NCBP1	0.0748	0.1008	0.6277
Q8WXI9	GATAD2B	-0.1085	0.013	0.813
Q99576	TSC22D3	0.7804	3.3214	2.2031
E5RGW4	NPM1	-0.1084	0.2671	0.0274
P34932	HSPA4	-0.0813	1.0058	2.1608
O75131	CPNE3	-0.0839	1.02	0.1837
P31689	DNAJA1	-0.1597	0.5429	1.0888
Q15397	KIAA0020	-0.3014	2.8865	0.1097
Q8NI08	NCOA7	0.2828	1.317	0.3783
P27338	MAOB	2.2708	6.5241	0.874
O94760	DDAH1	-2.467	4.3294	7.8531
Q86VS8	HOOK3	0.0305	0.6677	1.4575
Q9NPJ3	ACOT13	-0.0496	0.1857	0.0375
Q5VZE5	NAA35	-0.556	0.4583	3.8115
O94804	STK10	-0.4085	1.842	0.6217
O43422	PRKRIR	0.7341	1.6442	0.8162
A6NDU8	C5orf51	-0.2088	1.4394	0.0708
P13797	PLS3	-0.1149	0.243	0.7783
Q07617	SPAG1	0.2289	1.4059	0.3106
O60831	PRAF2	-0.1533	1.9701	0.5351
Q99848	EBNA1BP2	-0.3653	3.5218	0.6871
Q9BVC5	C2orf49	-0.1036	0.0117	0.0396
P29373	CRABP2	1.5452	5.2443	2.5175
O14617	AP3D1	0.2404	1.689	0.7105
Q9HB21	PLEKHA1	-0.9702	3.1217	4.1218
O75175	CNOT3	-0.1816	0.2047	1.1734
Q96JC1	VPS39	0.1335	1.6042	2.2241
P04406	GAPDH	-0.1506	1.6423	0.24
Q7L576	CYFIP1	-0.3467	1.9779	1.4064
Q01831	XPC	0.5872	1.3672	1.2885
A6ZKI3	FAM127A	0.0223	0.5983	1.169
O75794	CDC123	-0.0464	0.2845	0.0539
Q9H0E3	SAP130	-0.1262	0.5213	0.1221
O43493	TGOLN2	-1.3212	6.7907	1.6113
P62888	RPL30	-0.0552	0.0845	0.3241
O60524	NEMF	-0.1226	0.3015	0.6011
O15020	SPTBN2	0.0716	0.4302	0.8432
Q5RHS7	S100A2	-5.7676	1.3768	0.6943
Q8WUX1	SLC38A5	-1.0158	9.1476	1.8227
Q9Y3B2	EXOSC1	0.2112	0.4575	0.4311
Q8WZA0	LZIC	0.065	1.2683	2.2391
Q9UNS2	COPS3	0.0234	0.511	0.2729
Q8N4H5	TOMM5	0.1104	0.2909	0.3658
Q15650	TRIP4	0.2259	2.0195	0.5685
P39019	RPS19	0.0478	0.072	0.2256
P42330	AKR1C3	0.195	1.8685	0.293
Q6UWE0	LRSAM1	0.0466	0.1528	0.1272
Q9BVJ6	UTP14A	-0.07	1.221	0.5926
P33316-2	DUT	0.0988	0.1914	0.5071
P68363	TUBA1B;KLK9;TUBA1A	-0.3423	1.3621	2.295
Q96CM3	RPUSD4	0.6367	1.2787	2.0614
P20073	ANXA7	0.0148	0.7085	0.5303
Q8NB46	ANKRD52	-0.3965	1.0368	0.2614
O00233	PSMD9	0.3642	2.0957	2.2549
P55884	EIF3B	0.0515	0.2407	0.1796
P62841	RPS15	-0.1516	0.3797	0.6724
P52564	MAP2K6	0.2982	0.207	1.3685
Q9NUQ9	FAM49B	-0.0141	0.3259	0.3267
Q96B97	SH3KBP1	-0.2835	1.137	0.1399
P49770	EIF2B2	0.6137	2.7381	2.1615
O60907	TBL1X	-0.2061	0.8335	0.0251
Q9Y6E2	BZW2	-0.5022	4.8833	0.8112
Q9UER7	DAXX	-0.1213	0.2974	0.7129
P23743	DGKA	0.8828	2.5747	3.7987
Q99873-4	PRMT1	0.0869	0.5351	0.2185
Q13472	TOP3A	0.067	0.6346	0.2355
Q96QE5	TEFM	0.4548	0.7009	1.7884
P13674	P4HA1	-0.0235	2.7104	2.3002
Q9BPZ7	MAPKAP1	-0.2097	1.7767	0.2349
Q96Q45	TMEM237	-0.5228	0.5312	0.3072
Q9UBV8	PEF1	-0.4541	1.5229	0.7602
Q8IZP0	ABI1	0.039	0.8572	1.5731
Q9NV06	DCAF13	-0.2073	1.3811	0.358
P78347	GTF2I	-0.4239	1.2454	3.6159
Q9H2U2	PPA2	-0.0551	0.3717	0.0623
Q12802	AKAP13	0.067	1.2203	0.7159
Q86XL3	ANKLE2	-0.626	3.3462	1.0711
Q9BTC0	DIDO1	-0.0327	0.2678	0.4951
P20042	EIF2S2	0.2452	0.6473	2.1302
Q5M775	SPECC1	0.0995	0.936	0.0563
P49591	SARS	0.351	1.5419	2.868
J3KN66	TOR1AIP1	0.4399	0.9027	0.5101
O95999	BCL10	0.429	1.0909	0.5668
O43865	AHCYL1	-0.1798	0.0124	1.2978
Q9BYJ9	YTHDF1	-0.0144	0.6244	0.6012
Q14498	RBM39;RNPC2	-0.1936	1.2738	0.6909
P16152	CBR1	-0.5347	6.8762	0.4495
Q15007	WTAP	-0.0441	0.1689	0.4618
J3QRU1	YES1	0.1729	1.8725	0.1162
Q96T17-2	MAP7D2	0.1789	0.8599	0.4274
Q14151	SAFB2	0.0778	0.2182	0.2392
O60884	DNAJA2	-0.0508	0.6055	0.1803
Q12929	EPS8	-0.219	0.2926	0.9984
Q5JVF3	PCID2	0.0352	0.0313	0.2963
O95602	POLR1A	-0.0078	0.5244	0.5326
P68400	CSNK2A1;CSNK2A3	-0.2051	0.4904	1.6731
Q9ULG6	CCPG1	-0.1049	0.352	0.63
P61081	UBE2M	0.1481	1.0346	0.2249
P62891	RPL39;RPL39P5	-0.2293	0.2235	0.0889
O75521	ECI2	0.0434	1.0464	0.2848
B0FLL2	PFKFB2	0.8781	0.0189	0.346
Q8IUF8	MINA	-3.7706	0.7098	1.2405
P51812	RPS6KA3	-0.0932	0.1888	0.5732
Q92572	AP3S1	0.8529	1.4026	1.4217
Q15631	TSN	-0.2742	0.3876	0.3663
Q8TD57	DNAH3	0.0897	1.0636	0.0222
P51809	VAMP7	0.7449	1.3107	1.9577
Q13084	MRPL28	0.0568	0.7448	0.2212
O75251	NDUFS7	0.3666	1.7685	0.209
Q9NWV8	BABAM1	-0.0893	1.1698	0.5947
O95249	GOSR1	-1.9745	7.0012	0.1958
Q9H8H2	DDX31	0.2473	0.3057	2.6419
Q86U28	ISCA2	0.5151	2.0739	3.8928
Q86UE8	TLK2	0.3086	1.5792	1.2306
Q9Y5P6	GMPPB	0.3011	1.653	0.9998
Q9NW08	POLR3B	-0.4012	1.6628	0.7954
P19525	EIF2AK2	0.3665	2.6636	0.974
Q9Y5Z4	HEBP2	0.162	0.811	0.1104
Q9HB40	SCPEP1	0.3762	0.5374	3.2237
Q9UEY8	ADD3	0.1539	0.9177	0.1053
Q9NRY2	INIP	-0.1338	0.8186	0.1873
Q5VV41	ARHGEF16	-0.5928	1.3308	0.3226
Q00610	CLTC	0.0152	0.1226	0.0177
P40937	RFC5	-0.1703	0.4307	0.8971
Q9BT17	MTG1	0.3068	0.7296	1.3778
P05166	PCCB	-0.155	0.2525	0.3956
P45954	ACADSB	0.5545	0.486	1.666
Q96J01	THOC3	-0.0634	0.7112	0.2328
Q7L2J0	MEPCE	-0.0526	0.2171	0.0143
O00560	SDCBP	0.5335	4.3658	0.544
Q8TB61	SLC35B2	0.2881	1.041	0.5119
O43818	RRP9	0.567	0.551	1.7726
Q6IAA8	LAMTOR1	0.2874	0.6523	1.4837
Q9UI30	TRMT112	0.2284	0.2044	1.8551
Q9Y5Y0	FLVCR1	0.6158	3.6038	0.4146
P42696	RBM34	0.0446	0.2242	0.5453
Q8NBJ7	SUMF2	0.2108	0.0768	1.8916
P42345	MTOR	-0.1755	0.6165	0.374
Q13451	FKBP5	0.369	0.9153	2.4594
O43143	DHX15	-0.154	0.4139	1.0426
Q9Y5Q9	GTF3C3	0.1622	1.9566	0.6866
Q9BS16	CENPK	-0.1608	0.8473	0.262
Q9ULH1	ASAP1	0.614	1.6974	1.9445
P05455	SSB	0.0321	0.574	0.9954
Q69YN4	KIAA1429	-0.377	2.0536	0.461
Q9HBM1	SPC25	-0.7301	1.3539	2.3128
Q01518	CAP1	-0.0236	0.2322	0.1443
Q9Y265	RUVBL1	-0.0548	0.468	0.0462
Q9NXG6	P4HTM	0.0281	0.3277	0.4629
Q9BRT8	CBWD1;CBWD2;CBWD5;CBWD3;CBWD6	0.5184	2.5548	1.3213
Q9GZM3	POLR2J2;POLR2J;POLR2J3;POLR2J1	-0.655	0.6355	4.1457
Q9BXP5	SRRT	0.0805	0.0104	0.5999
P61604	HSPE1	0.0635	0.1408	0.3208
Q9NX74	DUS2	-0.3241	0.1383	1.3216
P35269	GTF2F1	0.222	0.8381	0.4993
Q9BVG4	PBDC1	-0.0613	0.8376	1.6231
P43155	CRAT	0.1816	1.4469	0.2007
O75436	VPS26A	-0.3058	3.2264	0.2923
P0DI81	TRAPPC2;TRAPPC2P1	-0.2712	0.4177	1.9404
Q16881	TXNRD1;GML	0.1896	2.017	0.0327
O43615	TIMM44	-0.0263	0.8613	1.0053
Q92616	GCN1L1	0.0074	0.0548	0.1204
Q9P016	THYN1	0.0946	0.1923	0.7086
Q01518-2	CAP1	0.0464	0.3742	0.0591
Q6UX71	PLXDC2	0.0539	0.2395	0.259
Q9Y618	NCOR2	-0.2474	0.0955	0.7876
Q8NB90	SPATA5	0.3437	2.0333	0.5758
P62487	POLR2G	-0.1901	0.3862	0.9673
Q8NI22	MCFD2	-0.1223	0.3891	0.2839
Q9UJY4	GGA2	0.6691	4.7937	1.5462
Q12982	BNIP2	-0.1796	0.5389	1.155
Q99570	PIK3R4	-0.644	3.3667	2.6088
Q15005	SPCS2	-0.158	0.7891	0.3022
O75208	COQ9	-0.5504	0.8732	0.9127
Q8IYB8	SUPV3L1	0.4446	0.7018	1.332
P49257	LMAN1	-0.0993	0.4402	0.2015
P49189	ALDH9A1	0.2249	1.6542	0.3135
Q9NXG2	THUMPD1	0.2671	2.2752	0.2641
P15735	PHKG2	-0.3753	1.2433	0.9115
Q9H6X2	ANTXR1	-0.6191	2.1481	0.7521
Q9UHD2	TBK1	0.6884	0.189	2.8539
O14556	GAPDHS	-0.0209	0.3388	0.1559
Q8NFJ5	GPRC5A	-1.0975	4.1093	3.6898
Q9UNN5	FAF1	-0.4602	2.2111	0.2856
Q01085-2	TIAL1	-0.1335	0.8692	0.2565
Q15599	SLC9A3R2	-0.1641	0.608	0.6105
Q9Y230	RUVBL2	-0.0755	0.6859	0.1323
P32119	PRDX2	0.2321	1.289	1.4135
Q13126	MTAP	-0.1001	0.5497	0.1058
P12004	PCNA	-0.084	0.7542	0.1292
P05362	ICAM1	0.6985	5.2185	0.0451
Q9H773	DCTPP1	-0.4009	3.4239	0.6093
Q9HBH0	RHOF	0.6273	3.9176	0.3274
P26196	DDX6	-0.093	0.0592	0.6888
P49959	MRE11A	-0.0972	0.5631	0.0258
Q13257	MAD2L1	-1.1968	2.2612	3.3019
Q53GS7	GLE1	0.0386	0.6797	0.4083
O60294	LCMT2	0.2888	0.7494	1.1511
Q6P1Q9	METTL2B;METTL2A	0.0668	0.1283	0.0911
Q13868	EXOSC2	-0.0374	0.0246	0.1861
P62191	PSMC1	0.1496	0.845	0.6571
O75312	ZPR1	0.3046	1.9069	0.9327
Q9UNF0	PACSIN2	-0.232	0.4175	2.229
Q9BV19	C1orf50	0.2055	0.1344	1.2236
P17813	ENG	0.1058	0.0483	0.3252
Q05397	PTK2	0.001	2.0558	2.2106
P52888	THOP1	0.044	0.172	0.5891
Q9UPT8	ZC3H4	0.0653	0.2385	0.1893
Q8IY37	DHX37	0.1714	0.3506	0.6529
Q92576	PHF3	-0.1811	0.7985	0.6914
Q9NSD9	FARSB	0.0919	0.2149	1.1766
Q8N9N2-2	ASCC1	0.0365	0.1954	0.4896
Q8N2K0	ABHD12	1.0126	4.5279	0.7069
Q12888	TP53BP1	-0.0003	0.2155	0.1984
Q15813	TBCE	0.0706	0.042	0.5431
Q9Y2T2	AP3M1	-0.2969	0.0951	1.8163
P23368	ME2	0.1594	1.0399	0.2611
H3BMA1	MSLN	0.866	2.7626	2.2319
P11047	LAMC1	-0.2457	0.4057	0.2419
O43318	MAP3K7;DKFZp586F0420	-0.0318	0.1159	0.0081
Q9UFN0	NIPSNAP3A	0.0237	0.067	0.0477
Q14974	KPNB1	-0.3024	1.354	2.2122
Q92995	USP13	0.2782	0.7409	0.4979
O94822	LTN1	-0.0222	0.3837	0.6262
Q13838	DDX39B;hCG_2005638	0.189	0.4471	1.2304
Q01082	SPTBN1	0.0973	0.866	0.1784
Q9BTZ2	DHRS4	-0.0228	0.2181	0.1757
A4D1E9	GTPBP10	0.3313	0.5944	1.5534
Q9UHG3	PCYOX1	-0.0038	1.0338	0.8482
O60725	ICMT	-0.4037	1.4802	0.0358
Q9Y221	NIP7	-0.2145	3.7199	0.6324
Q14254	FLOT2	0.3784	2.7729	1.2035
Q14739	LBR	0.0893	0.2661	0.2107
B4DY08	HNRNPC	-0.0545	0.7041	0.2942
Q9P0J1	PDP1	-0.6978	0.8518	3.9067
Q969G3	SMARCE1	-0.2252	0.1525	1.3369
Q9H3U1-2	UNC45A	0.1031	1.0935	0.1842
Q9Y2Q3	GSTK1	0.506	3.374	0.6009
Q9NR56	MBNL1	-0.1033	0.5643	0.0546
Q8NCW5	APOA1BP	0.4867	1.6209	2.4675
Q9UPQ0-6	LIMCH1	0.1176	0.3371	0.5065
Q9NUL7	DDX28	-0.4168	1.8776	1.0277
Q9UL40	ZNF346	-0.1376	0.1463	0.8737
Q6YHK3	CD109	-1.0074	7.9442	2.5391
Q9GZR2	REXO4	-0.2059	1.1059	0.2682
Q14185	DOCK1	0.4191	1.2362	2.2562
P49720	PSMB3	-0.62	3.8782	1.1528
P09543	CNP	0.0962	0.9867	2.2292
O95747	OXSR1	-0.3315	2.7574	0.697
Q68CZ6	HAUS3	-0.1294	0.2413	0.132
Q96CB9	NSUN4	-0.4451	1.948	0.1056
Q8NDH3	NPEPL1	0.7735	1.9184	1.9162
P56537	EIF6	-0.0638	0.228	0.7543
O43399-2	TPD52L2	0.4598	0.8213	5.3098
Q8WZ82	OVCA2	0.5282	2.1844	1.8303
P32456	GBP2	0.557	1.8328	3.0591
Q8IX18	DHX40	-0.4718	2.823	0.1034
P48147	PREP	0.1127	0.3843	0.2183
Q14669	TRIP12	-0.1419	0.2658	1.5702
P32929	CTH	-0.2981	1.2556	0.1146
Q9UHJ6	SHPK	0.3926	0.8979	0.8671
Q9BWU0	SLC4A1AP	-0.3758	1.8115	0.5884
Q969V3	NCLN	0.11	0.1103	0.8754
P14621	ACYP2	-0.3731	0.4563	0.8986
Q13188	STK3	0.1891	1.1998	0.0358
Q9NPI7	KRCC1	-0.6629	0.1662	3.9853
Q06587	RING1	0.3599	1.2987	0.8187
Q8N257	HIST3H2BB	-0.1653	1.3292	0.0662
Q10567	AP1B1	-0.1571	0.253	0.9166
P49207	RPL34	0.1391	0.1871	0.6676
P06756	ITGAV	-0.5951	1.958	2.7608
Q9P2T1	GMPR2	1.1391	3.5357	3.5526
P31946	YWHAB	-0.0877	0.2239	0.2165
Q9C0B5	ZDHHC5	-0.2304	0.206	1.3544
O75223	GGCT	0.2087	0.5921	1.163
Q9BRX8	FAM213A	-0.3795	0.2396	0.2586
P07686	HEXB	0.1472	0.0223	1.8022
E7EWI9	HNRNPA3	0.1262	0.4507	1.247
P61764	STXBP1	0.5378	4.6935	0.5919
Q13526	PIN1	-0.0736	0.3826	0.0963
P78318	IGBP1	0.3134	1.2469	1.3855
Q14690	PDCD11	0.0335	0.6256	0.9898
Q8TDB6	DTX3L	-0.3236	0.3538	1.0719
F5H6I7	ATL3	-0.9224	1.5633	2.0051
P23229-2	ITGA6	0.0949	0.0808	0.6147
P04843	RPN1	-0.0125	0.0559	0.1537
P51149	RAB7A	0.0635	0.2807	0.2543
Q6ZNJ1	NBEAL2	0.1515	0.1105	0.6938
O15498	YKT6	-0.2744	0.5328	0.9594
Q96GX2	ATXN7L3B	-0.2538	2.0493	0.4107
P50213	IDH3A	0.431	1.8847	1.62
Q68CP9	ARID2	-0.2394	1.5227	0.2235
P22670	RFX1	0.0804	0.4298	0.0948
Q13045	FLII	-0.1599	1.1878	0.5466
Q99614	TTC1	-0.1065	0.2452	1.4377
O95302	FKBP9	-1.0334	3.9875	0.3051
Q8IVS2	MCAT	0.2848	1.738	0.7046
O95544	NADK	0.3292	5.9888	3.5076
Q13769	THOC5	1.617	2.3315	2.0412
P31350	RRM2	-0.3062	0.795	1.8468
O00479	HMGN4	-0.0845	0.0064	0.353
O94826	TOMM70A	0.0786	0.7013	0.05
O60563	CCNT1	-0.7176	1.9299	0.4399
P98194	ATP2C1	0.1516	0.3835	0.6018
Q9Y2Z4	YARS2	0.1137	1.2231	0.1441
Q9NVN8	GNL3L	-0.0509	0.8167	0.8114
Q9UNM6	PSMD13	0.0722	0.2867	0.1865
O14578	CIT	0.0068	0.4079	0.1751
Q9Y3A6	TMED5	0.0575	0.0368	0.4567
Q8TED1	GPX8	-0.0917	0.0205	0.7471
Q8ND56	LSM14A	0.0362	0.0287	0.1281
Q96SZ5	ADO	-0.8426	2.5421	0.8103
P62263	RPS14	0.1183	0.4497	0.49
O60508	CDC40	0.0217	0.4666	0.052
Q8TCD5	NT5C	-0.2772	1.7411	0.4319
Q14457	BECN1	-0.1195	0.0972	0.0636
Q9NVA1	UQCC1	0.5774	2.2021	1.7687
Q15526	SURF1	0.2097	0.147	1.0926
Q9Y3D6	FIS1	-0.03	0.0111	0.1451
O94992	HEXIM1	0.5702	1.8832	1.5225
Q15008	PSMD6	0.0282	0.4265	0.7267
P19623	SRM	-0.1312	0.9255	0.091
Q12797	ASPH	-0.0992	1.271	2.299
Q15334	LLGL1	-0.0396	0.2622	0.097
P17844	DDX5	-0.2069	0.4791	1.0439
A6NJ78	METTL15;METTL15P1	-0.5366	1.7101	0.4672
O75340	PDCD6	0.1381	0.2437	0.6416
P09132	SRP19	-0.1222	2.2944	1.4933
P41743	PRKCI	-0.2519	1.5071	0.1062
O00193	SMAP;C11orf58	-0.0259	0.3249	0.3505
Q96DI7	SNRNP40	-0.2542	0.4718	1.5254
Q96PU4	UHRF2	-0.3472	0.1629	1.6945
Q9NYU2	UGGT1	0.1175	0.4258	1.7573
P09104	ENO2	-0.0988	0.0811	0.487
O14981	BTAF1	-0.2147	0.9147	0.2428
Q96KP1	EXOC2	0.1713	0.6698	0.9592
O60936-2	NOL3	0.0591	1.1098	0.6249
Q13315	ATM	-0.8791	1.5678	5.4328
P08579	SNRPB2	-0.2898	1.1103	0.9774
Q9BW85	CCDC94	1.326	3.0865	2.6488
Q9UPW0	FOXJ3	-0.9856	3.5961	3.6742
Q5T5U3	ARHGAP21	0.1474	1.1405	1.5629
Q7Z3B4	NUP54	0.061	1.0539	0.3415
Q8TF01	PNISR	-0.4505	1.3065	1.4077
O14828-2	SCAMP3	0.0248	0.1991	0.0516
P21291	CSRP1	-0.4822	1.2304	1.771
P46976	GYG1	0.6784	2.1139	1.51
P49736	MCM2	0.0154	0.2967	0.4517
O75496	GMNN	-0.4297	0.227	2.3495
O43809	NUDT21	-0.0719	0.0054	0.3273
A6NEM2	HCFC1	-0.2066	0.7866	1.0711
Q9H0B6	KLC2	-0.0461	1.3765	1.5572
P49642	PRIM1	-0.3826	1.8024	0.9592
P13995	MTHFD2	1.0224	2.5416	2.239
P50991	CCT4	-0.2209	1.0554	1.2686
Q96N67	DOCK7	-0.4492	1.6083	1.11
Q15833	STXBP2;ZNF14	0.1022	0.0184	0.4694
O95295	SNAPIN	-0.0164	0.0879	0.0227
Q14157-1	UBAP2L	0.1061	0.5057	0.3617
F6XY72	NME1-NME2	-0.1834	0.273	0.5421
[truncated: 2,814 more rows]
