# Supplementary material for: Quantitative Proteomics and Differential Protein Abundance Analysis after Depletion of Putative mRNA Receptors in the ER Membrane of Human Cells Identifies Novel Aspects of mRNA Targeting to the ER
Source: Molecules. 2021 Jun 11;26(12):3591. doi: 10.3390/molecules26123591 (PMC8230838; doi:10.3390/molecules26123591)
Supplement: Supplementary file 1 [file molecules-26-03591-s001.zip › Table S2_RRBP1_full_lo.xlsx]

## Sheet: Sheet 1
Accession	Gene	Full protein name	log2 fold change	Subcellular location	SS or TMH	Number of TMD	Glycosylation sites	SP or TMH seq.	TMH position	AREs in 3´UTR
Q9P2E9	RRBP1	Ribosome-binding protein 1	-6.12186	Endoplasmic reticulum membrane	TMH	1	0	TLGVVVFGGFMVVSAIGIFLV	8 - 28	0
Q8IV50	LYSMD2	LysM and putative peptidoglycan-binding domain-containing protein 2	-5.63418			0	0			2
P23471	PTPRZ1	Receptor-type tyrosine-protein phosphatase zeta	-4.52409	Cell membrane, Secreted	SP	1	24	MRILKRFLACIQLLCVCRLDWANG		5
O75382	TRIM3	Tripartite motif-containing protein 3	-3.55435	Golgi apparatus, Cytoplasm, Cell projection, Early endosome, trans-Golgi network, Dendrite		0	0			1
Q9HBK9	AS3MT	Arsenite methyltransferase	-3.25771	Cytoplasm		0	0			19
Q8IYT4	KATNAL2	Katanin p60 ATPase-containing subunit A-like 2	-2.91478	Cytoskeleton, Cytoplasm		0	0			3
Q6ZRV2	FAM83H	Protein FAM83H	-2.69553	Cytoskeleton, Cytoplasm		0	0			1
Q9UKB3	DNAJC12	DnaJ homolog subfamily C member 12	-2.6419			0	0			4
Q92834-6	RPGR	X-linked retinitis pigmentosa GTPase regulator	-2.52576	Centrosome, Flagellum axoneme, Golgi apparatus, Cytoskeleton, Cilium axoneme, Microtubule organizing center, Cilium basal body, Cytoplasm		0	0			0
O94760	DDAH1	N(G),N(G)-dimethylarginine dimethylaminohydrolase 1	-2.46704			0	0			8
Q8IZW8	TNS4	Tensin-4	-2.42945	Cytoskeleton, Cytoplasm, Focal adhesion, Cell junction	SP	0	0	MSQVMSSPLLAGGHAVSL		1
Q6EEV4-2	POLR2M	DNA-directed RNA polymerase II subunit GRINL1A	-2.23215	Nucleus		0	0			8
P07093	SERPINE2	Glia-derived nexin	-2.21303	Secreted, Extracellular space	SP	0	2	MNWHLPLFLLASVTLPSIC		2
Q2PZI1	DPY19L1	Probable C-mannosyltransferase DPY19L1	-2.16117	Membrane	TMH	11	0	LYYSYFKTIVEAPSFLNGVWMIM	66 - 88	6
Q6PCE3	PGM2L1	Glucose 1,6-bisphosphate synthase	-2.14917			0	0			22
D9YZV2	TPM1	Tropomyosin alpha-1 chain	-2.13738	Cytoskeleton, Cytoplasm		0	0			7
Q9BVV7	TIMM21	Mitochondrial import inner membrane translocase subunit Tim21	-2.13667	Mitochondrion membrane	TMH	1	0	FTYLIVVLFGISITGGLFYTI	108 - 128	5
Q96T68	SETDB2	Histone-lysine N-methyltransferase SETDB2	-2.10156	Nucleus, Chromosome		0	0			10
Q9NVV4	MTPAP	Poly(A) RNA polymerase, mitochondrial	-2.0939	Cytoplasm, Mitochondrion		0	0			9
Q8IW35	CEP97	Centrosomal protein of 97 kDa	-2.03812	Centrosome, Microtubule organizing center, Cytoplasm, Cytoskeleton		0	0			21
Q6PIU2	NCEH1	Neutral cholesterol ester hydrolase 1	-2.01903	Microsome, Membrane	TMH	1	3	CVLLTALVALAAYYVYIPLPG	5 - 25	5
Q6SJ93	FAM111B	Protein FAM111B	-1.96431			0	0			0
Q6N069	NAA16	N-alpha-acetyltransferase 16, NatA auxiliary subunit	-1.92399			0	0			4
O43294	TGFB1I1	Transforming growth factor beta-1-induced transcript 1 protein	-1.91465	Cell junction, Focal adhesion, Nucleus matrix, Cytoskeleton, Cytoplasm		0	0			0
P18827	SDC1	Syndecan-1	-1.88764	Membrane, Exosome, Secreted	SP	1	6	MRRAALWLWLCALALSLQPALP		0
P35908	KRT2	Keratin, type II cytoskeletal 2 epidermal	-1.85946			0	0			1
O75665	OFD1	Oral-facial-digital syndrome 1 protein	-1.82946	Centrosome, Cytoskeleton, Centriole, Nucleus, Centriolar satellite, Cytoplasm, Cilium basal body, Microtubule organizing center		0	0			0
P35527	KRT9	Keratin, type I cytoskeletal 9	-1.78928			0	0			0
Q9P270	SLAIN2	SLAIN motif-containing protein 2	-1.76591	Cytoplasm, Cytoskeleton		0	0			16
Q8N1Q1	CA13	Carbonic anhydrase 13	-1.7334			0	0			7
P29692-4	EEF1D	Elongation factor 1-delta	-1.72553	Nucleus		0	0			0
P81605	DCD	Dermcidin	-1.69613	Secreted	SP	0	0	MRFMTLLFLTALAGALVCA		1
Q8IXS6-2	PALM2-AKAP2;PALM2	Paralemmin-2	-1.65695	Cell membrane		0	0			0
P04264	KRT1	Keratin, type II cytoskeletal 1	-1.65126	Cell membrane		0	0			0
Q5JU67	C9orf117	Cilia- and flagella-associated protein 157	-1.60232	Cell projection, Cilium		0	0			0
Q9BSE5	AGMAT	Agmatinase, mitochondrial	-1.59681	Mitochondrion		0	0			1
Q8N3R9	MPP5	MAGUK p55 subfamily member 5	-1.5613	Tight junction, Endomembrane system, Cell junction, Cell membrane		0	0			0
P13645	KRT10	Keratin, type I cytoskeletal 10	-1.53898			0	0			10
Q15582	TGFBI	Transforming growth factor-beta-induced protein ig-h3	-1.52613	Extracellular space, Extracellular matrix, Secreted	SP	0	0	MALFVRLLALALALALGPAATLA		2
Q15723-4	ELF2	ETS-related transcription factor Elf-2	-1.41013	Nucleus		0	0			5
Q8NI35	INADL	InaD-like protein	-1.40044	Apical cell membrane, Cell membrane, Perinuclear region, Cytoplasm, Tight junction, Cell junction		0	0			9
Q9UH99	SUN2	SUN domain-containing protein 2	-1.35973	Nucleus inner membrane, Nucleus envelope, Endosome membrane	TMH	1	1	FLWFLLPLLLLTCLTYGAWYF	213 - 233	1
P55290	CDH13	Cadherin-13	-1.34711	Cell membrane	SP	0	8	MQPRTPLVLCVLLSQVLLLTSA		8
Q96LD4	TRIM47	Tripartite motif-containing protein 47	-1.32169	Cytoplasm, Nucleus		0	0			0
O75410	TACC1	Transforming acidic coiled-coil-containing protein 1	-1.28717	Microtubule organizing center, Cytoplasm, Cytoskeleton, Nucleus, Membrane, Midbody, Centrosome		0	0			11
Q15345	LRRC41	Leucine-rich repeat-containing protein 41	-1.2858			0	0			1
P30154	PPP2R1B	Serine/threonine-protein phosphatase 2A 65 kDa regulatory subunit A beta isoform	-1.23721			0	0			5
Q9BRX5	GINS3	DNA replication complex GINS protein PSF3	-1.22652	Nucleus		0	0			1
Q6DD88	ATL3	Atlastin-3	-1.2024	Endoplasmic reticulum membrane	TMH	2	0	VLFTGIVALYIASGLTGFIGL	446 - 466	18
Q13257	MAD2L1	Mitotic spindle assembly checkpoint protein MAD2A	-1.19687	Kinetochore, Spindle pole, Cytoplasm, Cytoskeleton, Centromere, Nucleus, Chromosome		0	0			13
Q9BVC4	MLST8	Target of rapamycin complex subunit LST8	-1.16956	Cytoplasm		0	0			0
Q13309	SKP2	S-phase kinase-associated protein 2	-1.15087	Cytoplasm, Nucleus		0	0			4
P56211	ARPP19	cAMP-regulated phosphoprotein 19	-1.14537	Cytoplasm		0	0			15
Q15853	USF2;USF1	Upstream stimulatory factor 2	-1.14339	Nucleus		0	0			1
O15269	SPTLC1	Serine palmitoyltransferase 1	-1.13547	Endoplasmic reticulum membrane	TMH	1	0	ALYEAPAYHLILEGILILWII	16 - 36	4
Q96AQ6	PBXIP1	Pre-B-cell leukemia transcription factor-interacting protein 1	-1.11916	Cytoplasm, Cytoskeleton, Nucleus		0	0			0
Q8NFJ5	GPRC5A	Retinoic acid-induced protein 3	-1.09741	Cytoplasmic vesicle membrane, Cell membrane	TMH	7	1	VATAGVVTSVAFMLTLPILVC	34 - 54	5
O95628-8	CNOT4	CCR4-NOT transcription complex subunit 4	-1.07034	Nucleus, Cytoplasm		0	0			10
O75376	NCOR1	Nuclear receptor corepressor 1	-1.05953	Nucleus		0	0			12
P02795	MT2A;MT1X;MT1G	Metallothionein-2	-1.05626			0	0			0
O95864	FADS2	Fatty acid desaturase 2	-1.05326	Endoplasmic reticulum membrane	TMH	4	0	FFLLLLAHIIALESIAWFTVF	132 - 152	0
P49006	MARCKSL1	MARCKS-related protein	-1.04197	Membrane, Cell membrane, Cytoplasm		0	0			0
Q86Y37	CACUL1	CDK2-associated and cullin domain-containing protein 1	-1.03013			0	0			14
O75815	BCAR3	Breast cancer anti-estrogen resistance protein 3	-1.02565			0	0			3
Q8WUX1	SLC38A5	Sodium-coupled neutral amino acid transporter 5	-1.01585	Cell membrane	TMH	11	1	SFGMSVFNLSNAIMGSGILGLAY	49 - 71	0
Q9H300	PARL	Presenilins-associated rhomboid-like protein, mitochondrial	-1.01538	Mitochondrion inner membrane, Nucleus	TMH	7	0	LFFTVGFTGCAFGSAAIWQY	102 - 121	0
Q9NPI6	DCP1A	mRNA-decapping enzyme 1A	-1.01189	Nucleus, Cytoplasm, P-body		0	0			10
Q6YHK3	CD109	CD109 antigen	-1.00749	Cell membrane	SP	0	10	MQGPPLLTAAHLLCVCTAALA		18
Q9UPW0	FOXJ3	Forkhead box protein J3	-0.985626	Nucleus		0	0			8
P50452	SERPINB8	Serpin B8	-0.984429	Cytoplasm		0	0			8
O75976	CPD	Carboxypeptidase D	-0.983163	Cell membrane	SP	1	15	MASGRDERPPWRLGRLLLLMCLLLLGSSARA		13
Q00534	CDK6	Cyclin-dependent kinase 6	-0.973237	Nucleus, Cytoskeleton, Ruffle, Cytoplasm, Microtubule organizing center, Cell projection, Centrosome		0	0			26
Q9HB21	PLEKHA1	Pleckstrin homology domain-containing family A member 1	-0.970199	Cytoplasm, Nucleus, Cell membrane		0	0			35
Q9BXW9	FANCD2	Fanconi anemia group D2 protein	-0.96815	Nucleus		0	0			4
Q01995	TAGLN	Transgelin	-0.957409	Cytoplasm		0	0			0
P61020	RAB5B	Ras-related protein Rab-5B	-0.938098	Melanosome, Cell membrane, Early endosome membrane		0	0			8
O75448	MED24	Mediator of RNA polymerase II transcription subunit 24	-0.927354	Nucleus		0	0			0
Q14C86	GAPVD1	GTPase-activating protein and VPS9 domain-containing protein 1	-0.925337	Endosome, Membrane		0	0			33
Q99985	SEMA3C	Semaphorin-3C	-0.921378	Secreted	SP	0	7	MAFRTICVLVGVFICSICVK		10
P08195	SLC3A2	4F2 cell-surface antigen heavy chain	-0.903192	Melanosome, Apical cell membrane	TMH	1	4	LLLLFWLGWLGMLAGAVVIIV	185 - 205	0
P68431	HIST1H3A	Histone H3.1	-0.902827	Nucleus, Chromosome		0	0			0
Q8NBK3	SUMF1	Sulfatase-modifying factor 1	-0.899618	Endoplasmic reticulum lumen	SP	0	1	MAAPALGLVCGRCPELGLVLLLLLLSLLCGAAG		1
Q8IYT2	CMTR2	Cap-specific mRNA (nucleoside-2'-O-)-methyltransferase 2	-0.894123	Cytoplasm, Membrane, Nucleus	TMH	1	0	VMILPVLSCFTRFMAGLIFVL	642 - 662	7
Q96N46	TTC14	Tetratricopeptide repeat protein 14	-0.857627			0	0			2
O15121	DEGS1	Sphingolipid delta(4)-desaturase DES1	-0.835672	Mitochondrion, Membrane, Endoplasmic reticulum membrane	TMH	6	0	PNLIWIIIMMVLTQLGAFYIV	41 - 61	2
Q9Y6D9	MAD1L1	Mitotic spindle assembly checkpoint protein MAD1	-0.829355	Kinetochore, Centrosome, Centromere, Cytoskeleton, Nucleus, Chromosome, Spindle, Microtubule organizing center, Cytoplasm		0	0			0
P07942	LAMB1	Laminin subunit beta-1	-0.829333	Extracellular space, Basement membrane, Secreted, Extracellular matrix	SP	0	11	MGLLQLLAFSFLALCRARVRA		1
P60520	GABARAPL2	Gamma-aminobutyric acid receptor-associated protein-like 2	-0.823591	Cytoplasmic vesicle, Autophagosome, Golgi apparatus		0	0			2
Q7Z6B0	CCDC91	Coiled-coil domain-containing protein 91	-0.817546	Golgi apparatus, Membrane, trans-Golgi network membrane		0	0			7
Q71DI3	HIST2H3A	Histone H3.2	-0.8023	Chromosome, Nucleus		0	0			0
Q16270	IGFBP7	Insulin-like growth factor-binding protein 7	-0.786862	Secreted	SP	0	1	MERPSLRALLLGAAGLLLLLLPLSSS		8
P48509	CD151	CD151 antigen	-0.776434	Membrane	TMH	4	1	LLFTYNCCFWLAGLAVMAVGI	19 - 39	0
Q53F19	C17orf85	Nuclear cap-binding protein subunit 3	-0.759965	Nucleus, Cytoplasm		0	0			11
Q9NVD7	PARVA	Alpha-parvin	-0.751564	Myofibril, Cytoskeleton, Cell junction, Sarcomere, Cell membrane, Cytoplasm, Focal adhesion, Z line		0	0			10
O75044	SRGAP2;SRGAP2C	SLIT-ROBO Rho GTPase-activating protein 2	-0.726524	Cell membrane, Postsynaptic density, Cell projection, Cytoplasm, Lamellipodium, Cytoplasmic vesicle, Postsynaptic cell membrane, Nucleus, Dendritic spine, Synapse, Phagosome, Cell junction		0	0			8
P21980	TGM2	Protein-glutamine gamma-glutamyltransferase 2	-0.725085			0	0			6
P48059-2	LIMS1	LIM and senescent cell antigen-like-containing domain protein 1	-0.719644	Focal adhesion, Cell junction, Cell membrane		0	0			10
Q93052	LPP	Lipoma-preferred partner	-0.716039	Cell junction, Cell membrane, Nucleus, Cytoplasm		0	0			0
Q05682-4	CALD1	Caldesmon	-0.701606	Myofibril, Cytoplasm, Cytoskeleton		0	0			8
Q9H9C1	VIPAS39	Spermatogenesis-defective protein 39 homolog	-0.698412	Late endosome, Recycling endosome, Cytoplasm, Early endosome, Cytoplasmic vesicle		0	0			1
Q13371	PDCL	Phosducin-like protein	-0.690512			0	0			9
O14657	TOR1B	Torsin-1B	-0.677172	Endoplasmic reticulum lumen, Nucleus membrane	SP	0	2	MLRAGWLRGAAALALLLAARVVAA		3
P35221	CTNNA1	Catenin alpha-1	-0.676073	Cytoskeleton, Cytoplasm, Cell membrane, Cell junction, Adherens junction		0	0			3
Q14118	DAG1	Dystroglycan	-0.675606	Cell membrane, Cytoplasm, Nucleoplasm, Nucleus, Postsynaptic cell membrane, Cytoskeleton, Secreted, Extracellular space, Sarcolemma, Cell junction, Synapse	SP	1	14	MRMSVGLSLLLPLSGRTFLLLLSVVMAQS		1
P08572	COL4A2	Collagen alpha-2(IV) chain	-0.672314	Extracellular matrix, Secreted, Extracellular space, Basement membrane	SP	0	1	MGRDQRAVAGPALRRWLLLGTVTVG		1
P35610	SOAT1	Sterol O-acyltransferase 1	-0.661236	Endoplasmic reticulum membrane	TMH	5	0	IYHMFIALLILFILSTLVV	141 - 159	11
Q8NHH9	ATL2	Atlastin-2	-0.659763	Endoplasmic reticulum membrane	TMH	2	0	TLFAVMFAMYIISGLTGFIGL	477 - 497	5
P19022	CDH2	Cadherin-2	-0.658569	Cell membrane	SP	1	7	MCRIAGALRTLLPLLAALLQASVEA		1
Q96QU8	XPO6	Exportin-6	-0.649781	Cytoplasm, Nucleus		0	0			0
Q99570	PIK3R4	Phosphoinositide 3-kinase regulatory subunit 4	-0.643989	Cytoplasmic vesicle, Autophagosome, Late endosome, Membrane		0	0			0
P52434	POLR2H	DNA-directed RNA polymerases I, II, and III subunit RPABC3	-0.642387	Nucleolus, Nucleus		0	0			1
O15078	CEP290	Centrosomal protein of 290 kDa	-0.63092	Cilium basal body, Cell projection, Microtubule organizing center, Cytoplasm, Centriolar satellite, Cytoplasmic vesicle, Centriole, Cytoskeleton, Cilium, Nucleus, Centrosome		0	0			2
O95758	PTBP3	Polypyrimidine tract-binding protein 3	-0.621181			0	0			17
O14732	IMPA2	Inositol monophosphatase 2	-0.598398			0	0			0
Q13418	ILK	Integrin-linked protein kinase	-0.587893	Cell junction, Myofibril, Lamellipodium, Focal adhesion, Cell projection, Cytoplasm, Cell membrane, Sarcomere		0	0			0
Q16850	CYP51A1	Lanosterol 14-alpha demethylase	-0.587522	Endoplasmic reticulum membrane, Microsome membrane	TMH	1	0	GNLLSMLLIACAFTLSLVYLI	24 - 44	5
Q15014	MORF4L2	Mortality factor 4-like protein 2	-0.582525	Nucleus		0	0			0
Q96QK1	VPS35	Vacuolar protein sorting-associated protein 35	-0.578538	Cytoplasm, Late endosome, Membrane, Endosome, Early endosome		0	0			14
Q9Y2R4	DDX52	Probable ATP-dependent RNA helicase DDX52	-0.567425	Nucleolus, Nucleus		0	0			11
Q07021	C1QBP	Complement component 1 Q subcomponent-binding protein, mitochondrial	-0.551333	Cytoplasm, Secreted, Mitochondrion matrix, Nucleus, Cell membrane, Nucleolus		0	0			2
P63313	TMSB10	Thymosin beta-10	-0.547087	Cytoplasm, Cytoskeleton		0	0			0
P14923	JUP	Junction plakoglobin	-0.5453	Membrane, Cytoskeleton, Cytoplasm, Adherens junction, Cell junction, Desmosome		0	1			0
Q15785	TOMM34	Mitochondrial import receptor subunit TOM34	-0.528407	Mitochondrion outer membrane, Cytoplasm		0	0			1
P24941	CDK2	Cyclin-dependent kinase 2	-0.528356	Centrosome, Endosome, Nucleus, Cajal body, Cytoskeleton, Cytoplasm, Microtubule organizing center		0	0			2
P20585	MSH3	DNA mismatch repair protein Msh3	-0.52281			0	0			1
P32004-2	L1CAM	Neural cell adhesion molecule L1	-0.52249	Cell membrane, Growth cone, Cell projection	SP	1	20	MVVALRYVWPLLLCSPCLL		0
Q9HDC9	APMAP	Adipocyte plasma membrane-associated protein	-0.517781	Membrane	TMH	1	2	VTFLMLAVSLTVPLLGAMMLL	41 - 61	0
E9PPD9	EPB41L2	Band 4.1-like protein 2	-0.514594	Cytoplasm, Cytoskeleton, Cell membrane		0	0			5
Q9H0W8	SMG9	Protein SMG9	-0.489407			0	0			5
Q06210	GFPT1	Glutamine--fructose-6-phosphate aminotransferase [isomerizing] 1	-0.480835			0	0			23
Q92820	GGH	Gamma-glutamyl hydrolase	-0.477698	Secreted, Melanosome, Lysosome, Extracellular space	SP	0	4	MASPGCLLCVLGLLLCGAASLELS		2
Q9H910	HN1L	Hematological and neurological expressed 1-like protein	-0.47708	Nucleus, Cytoplasm		0	0			0
Q9H2P0	ADNP	Activity-dependent neuroprotector homeobox protein	-0.475262	Nucleus		0	0			5
Q99747	NAPG	Gamma-soluble NSF attachment protein	-0.459373	Membrane		0	0			12
P61163	ACTR1A	Alpha-centractin	-0.459293	Microtubule organizing center, Cytoplasm, Cytoskeleton, Centrosome		0	0			2
O60841	EIF5B	Eukaryotic translation initiation factor 5B	-0.440301	Cytoplasm		0	0			4
P55060	CSE1L	Exportin-2	-0.435456	Cytoplasm, Nucleus		0	0			1
Q15084	PDIA6	Protein disulfide-isomerase A6	-0.43181	Endoplasmic reticulum lumen, Melanosome, Cell membrane	SP	0	0	MALLVLGLVSCTFFLAVNG		1
Q99674	CGREF1	Cell growth regulator with EF hand domain protein 1	-0.390754	Secreted	SP	0	0	MLPLTMTVLILLLLPTGQA		0
P18206	VCL	Vinculin	-0.363438	Cytoskeleton, Cytoplasm, Cell membrane, Cell junction, Focal adhesion, Adherens junction		0	0			6
P49321	NASP	Nuclear autoantigenic sperm protein	-0.34545	Nucleus, Cytoplasm		0	0			0
