# Supplementary material for: Quantitative Proteomics and Differential Protein Abundance Analysis after Depletion of Putative mRNA Receptors in the ER Membrane of Human Cells Identifies Novel Aspects of mRNA Targeting to the ER
Source: Molecules. 2021 Jun 11;26(12):3591. doi: 10.3390/molecules26123591 (PMC8230838; doi:10.3390/molecules26123591)
Supplement: Supplementary file 1 [file molecules-26-03591-s001.zip › Table S3_RRBP1_full_up.xlsx]

## Sheet: Sheet 1
Accession	Gene	Full protein name	log2 fold change	Subcellular location	SS or TMH	Number of TMD	Glycosylation sites	SP or TMH seq.	TMH position
O75674	TOM1L1	TOM1-like protein 1	1.98384	Golgi stack, Cytoplasm, Endosome membrane, Membrane, Golgi apparatus		0	0
O95197-3	RTN3	Reticulon-3	1.88139	Endoplasmic reticulum membrane, Golgi apparatus membrane		0	0
P10620	MGST1	Microsomal glutathione S-transferase 1	1.77029	Mitochondrion outer membrane, Endoplasmic reticulum membrane, Microsome	TMH	4	0	DEVFMAFASYATIILSKMMLMSTA	10 - 33
P09601	HMOX1	Heme oxygenase 1	1.72984	Endoplasmic reticulum membrane, Microsome		0	0
Q9Y3C0	CCDC53	WASH complex subunit CCDC53	1.67598	Early endosome		0	0
Q7Z6J9	TSEN54	tRNA-splicing endonuclease subunit Sen54	1.64178	Nucleolus, Nucleus		0	0
Q13769	THOC5	THO complex subunit 5 homolog	1.61702	Cytoplasm, Nucleus		0	0
Q969T7	NT5C3B	7-methylguanosine phosphate-specific 5'-nucleotidase	1.55492	Cytoplasm		0	0
P29373	CRABP2	Cellular retinoic acid-binding protein 2	1.54513	Cytoplasm, Nucleus, Endoplasmic reticulum		0	0
O15344	MID1	E3 ubiquitin-protein ligase Midline-1	1.53696	Spindle, Cytoplasm, Cytoskeleton		0	0
Q9UJ70	NAGK	N-acetyl-D-glucosamine kinase	1.49561			0	0
P25815	S100P	Protein S100-P	1.48845	Nucleus, Microvillus membrane, Cytoplasm, Cell projection		0	0
Q96F07-2	CYFIP2	Cytochrome b	1.47786	Cytoplasm, Perinuclear region, Nucleus, Synapse, Cell junction, Synaptosome		0	0
Q9HA77	CARS2	Probable cysteine--tRNA ligase, mitochondrial	1.4663	Mitochondrion matrix		0	0
O60361	NME2P1	Putative nucleoside diphosphate kinase	1.4047			0	0
Q7Z2K6	ERMP1	Endoplasmic reticulum metallopeptidase 1	1.38075	Endoplasmic reticulum membrane	TMH	9	2	AGTGLSEVRAALGLALYLIAL	64 - 84
P46934-4	NEDD4	E3 ubiquitin-protein ligase NEDD4	1.35509	Cytoplasm, Cell membrane		0	0
Q9BW85	CCDC94	Coiled-coil domain-containing protein 94	1.32603			0	0
Q96JI7	SPG11	Spatacsin	1.31244	Cytosol, Dendrite, Axon, Nucleus, Cytoplasm, Cell projection		0	0
Q13033	STRN3	Striatin-3	1.29777	Membrane, Cytoplasm		0	0
Q96BD5	PHF21A	PHD finger protein 21A	1.2771	Nucleus		0	0
O95219	SNX4	Sorting nexin-4	1.23683	Early endosome membrane		0	0
O00165	HAX1	HCLS1-associated protein X-1	1.23424	Cell cortex, Nucleus, P-body, Nucleus membrane, Endoplasmic reticulum, Sarcoplasmic reticulum, Cytoplasm, Cell membrane, Cytoplasmic vesicle, Mitochondrion		0	0
Q6UW78	C11orf83	Ubiquinol-cytochrome-c reductase complex assembly factor 3	1.21562	Mitochondrion inner membrane	TMH	1	0	LISVAMLGAGAGVGYALLVIV	8 - 28
Q9BXR0	QTRT1	Queuine tRNA-ribosyltransferase catalytic subunit 1	1.20397	Mitochondrion outer membrane, Cytoplasm		0	0
Q8NFU3	TSTD1	Thiosulfate sulfurtransferase/rhodanese-like domain-containing protein 1	1.19991	Perinuclear region, Cytoplasm		0	0
Q96EK6	GNPNAT1	Glucosamine 6-phosphate N-acetyltransferase	1.17801	Golgi apparatus membrane, Endosome membrane		0	0
P05161	ISG15	Ubiquitin-like protein ISG15	1.14329	Secreted, Cytoplasm		0	0
Q9P2T1	GMPR2	GMP reductase 2	1.13918			0	0
Q8N0X4	CLYBL	Citrate lyase subunit beta-like protein, mitochondrial	1.12458	Mitochondrion		0	0
Q8N3F8	MICALL1	MICAL-like protein 1	1.11732	Recycling endosome membrane, Late endosome membrane		0	0
P27105	STOM	Erythrocyte band 7 integral membrane protein	1.11344	Cell membrane, Cytoskeleton, Cytoplasm, Melanosome, Cytoplasmic vesicle, Membrane raft		0	0
P22570	FDXR	NADPH:adrenodoxin oxidoreductase, mitochondrial	1.10802	Mitochondrion matrix		0	0
O94903	PROSC	Proline synthase co-transcribed bacterial homolog protein	1.10281			0	0
Q96I51	WBSCR16	RCC1-like G exchanging factor-like protein	1.096			0	0
Q9Y315	DERA	Deoxyribose-phosphate aldolase	1.0551	Cytoplasmic granule, Nucleus, Cytoplasm		0	0
Q16864	ATP6V1F	V-type proton ATPase subunit F	1.05097			0	0
P30047	GCHFR	GTP cyclohydrolase 1 feedback regulatory protein	1.0509	Cytosol, Nucleus membrane, Cytoplasm, Nucleus		0	0
A8MTT3	CEBPZOS	Protein CEBPZOS	1.0356	Mitochondrion membrane	TMH	1	0	GVLVAELVGVFGAYFLFS	15 - 32
Q8NBW4	SLC38A9	Sodium-coupled neutral amino acid transporter 9	1.02894	Late endosome membrane, Lysosome membrane	TMH	11	4	LVTIFMIWNTMMGTSILSIPW	120 - 140
Q8NFW8	CMAS	N-acylneuraminate cytidylyltransferase	1.02533	Nucleus		0	0
Q9Y426	C2CD2	C2 domain-containing protein 2	1.02447	Secreted	SP	0	0	MAMARLGSWLGEAQWLALVSLFVAALATVGLYLAQWALARA
P13995	MTHFD2	Bifunctional methylenetetrahydrofolate dehydrogenase/cyclohydrolase, mitochondrial	1.02237	Mitochondrion		0	0
Q7L5Y9	MAEA	Macrophage erythroblast attacher	1.0199	Cell membrane, Nucleus matrix, Cytoplasm, Cytoskeleton		0	0
Q7L5Y1	ENOSF1	Mitochondrial enolase superfamily member 1	1.01596	Mitochondrion		0	0
Q9BUR5	APOO	MICOS complex subunit MIC26	1.0137	Secreted, Mitochondrion inner membrane, Endoplasmic reticulum membrane, Golgi apparatus membrane, Mitochondrion	SP	1	1	MFKVIQRSVGPASLSLLTFKVYAAP
Q96J42	TXNDC15	Thioredoxin domain-containing protein 15	0.981146	Membrane	SP	1	4	MVPAAGRRPPRVMRLLGWWQVLLWVLGLPVRG
Q6DHV7-2	ADAL	Adenosine deaminase-like protein	0.97626			0	0
A5PLN9	TRAPPC13	Trafficking protein particle complex subunit 13	0.959669			0	0
Q8WUH6	TMEM263	Transmembrane protein 263	0.956036	Membrane	TMH	2	1	GGIFSVTKGAVGATIGGVAWI	40 - 60
Q86VQ1	GLCCI1	Glucocorticoid-induced transcript 1 protein	0.93721			0	0
Q9H0U6	MRPL18	39S ribosomal protein L18, mitochondrial	0.919712	Mitochondrion		0	0
Q86Y82	STX12	Syntaxin-12	0.90652	Endomembrane system, Golgi apparatus membrane, Endosome membrane	TMH	1	0	KKMCILVLVLSVIILILGLII	249 - 269
P63172	DYNLT1	Dynein light chain Tctex-type 1	0.905047	Spindle, Cytoplasm, Cytoskeleton, Golgi apparatus		0	0
Q08499-6	PDE4D;DPYSL3	cAMP-specific 3',5'-cyclic phosphodiesterase 4D	0.899149	Apical cell membrane, Membrane, Cytoplasm, Cytoskeleton, Microtubule organizing center, Centrosome		0	0
O76070	SNCG	Gamma-synuclein	0.884513	Spindle, Centrosome, Microtubule organizing center, Perinuclear region, Cytoskeleton, Cytoplasm		0	0
P23743	DGKA	Diacylglycerol kinase alpha	0.882818			0	0
Q13421-4	MSLN	Mesothelin	0.866063	Cell membrane, Golgi apparatus, Secreted	SP	0	4	MALPTARPLLGSCGTPALGSLLFLLFSLGWVQPSRT
Q4V328	GRIPAP1	GRIP1-associated protein 1	0.866026	Early endosome		0	0
Q6DKK2	TTC19	Tetratricopeptide repeat protein 19, mitochondrial	0.864612	Microtubule organizing center, Cytoplasm, Cytoskeleton, Mitochondrion inner membrane, Midbody, Centrosome		0	0
Q96EY5	MVB12A	Multivesicular body subunit 12A	0.862414	Centrosome, Late endosome membrane, Nucleus, Endosome, Microtubule organizing center, Cytoplasm, Cytoskeleton		0	0
Q8NBX0	SCCPDH	Saccharopine dehydrogenase-like oxidoreductase	0.861027			0	0
Q9Y2I1	NISCH	Nischarin	0.848499	Cell membrane, Recycling endosome, Cytoplasm, Early endosome		0	0
Q96K37	SLC35E1	Solute carrier family 35 member E1	0.834451	Membrane	TMH	9	0	VILSAFPFPVTVSLCHILALC	50 - 70
Q00765	REEP5	Receptor expression-enhancing protein 5	0.803596	Endoplasmic reticulum, Membrane	TMH	2	0	SFIALGVIGLVALYLVFGYGA	35 - 55
Q9Y6N7	ROBO1	Roundabout homolog 1	0.791348	Cell projection, Axon, Cell membrane	SP	1	5	MKWKHVPFLVMISLLSLSPNHLFLA
P41247	PNPLA4	Patatin-like phospholipase domain-containing protein 4	0.790185	Mitochondrion		0	0
Q13627	DYRK1A	Dual specificity tyrosine-phosphorylation-regulated kinase 1A	0.786706	Nucleus speckle		0	0
Q99576	TSC22D3	TSC22 domain family protein 3	0.780431	Nucleus, Cytoplasm		0	0
Q587I9	SFT2D3	Vesicle transport protein SFT2C	0.780423	Membrane	TMH	4	0	CLLLAALCFGLAALYAPVLLL	83 - 103
O95394	PGM3	Phosphoacetylglucosamine mutase	0.77324			0	0
Q08380	LGALS3BP	Galectin-3-binding protein	0.768762	Secreted, Extracellular matrix, Extracellular space	SP	0	7	MTPPRLFWVWLLVAGTQG
O75569	PRKRA	Interferon-inducible double-stranded RNA-dependent protein kinase activator A	0.761099	Perinuclear region, Cytoplasm		0	0
Q92597	NDRG1	Protein NDRG1	0.756066	Cytoplasm, Cytoskeleton, Microtubule organizing center, Nucleus, Cell membrane, Cytosol, Centrosome		0	0
A2RUS2	DENND3	DENN domain-containing protein 3	0.746559			0	0
Q6PJ69	TRIM65	Tripartite motif-containing protein 65	0.741758			0	0
P35813	PPM1A	Protein phosphatase 1A	0.739154	Cytoplasm, Nucleus, Membrane, Cytosol		0	0
Q9UKK3	PARP4	Poly [ADP-ribose] polymerase 4	0.73377	Spindle, Nucleus, Cytoplasm, Cytoskeleton		0	0
P12235	SLC25A4	ADP/ATP translocase 1	0.725916	Mitochondrion inner membrane	TMH	6	0	AWSFLKDFLAGGVAAAVSKTAVAPIERVKLLLQVQ	5 - 39
P33897	ABCD1	ATP-binding cassette sub-family D member 1	0.722929	Peroxisome membrane	TMH	5	1	GLLALHSAALVSRTFLSVYVA	92 - 112
O75494	SRSF10	Serine/arginine-rich splicing factor 10	0.718669	Nucleus speckle, Cytoplasm		0	0
Q9H4Z3	PCIF1	Phosphorylated CTD-interacting factor 1	0.701725	Nucleus		0	0
Q13586	STIM1	Stromal interaction molecule 1	0.700295	Cytoplasm, Cytoskeleton, Endoplasmic reticulum membrane, Sarcoplasmic reticulum, Cell membrane	SP	1	2	MDVCVRLALWLLWGLLLHQGQS
Q96CN7	ISOC1	Isochorismatase domain-containing protein 1	0.690762			0	0
P83876	TXNL4A	Thioredoxin-like protein 4A	0.68607	Nucleus		0	0
Q00169	PITPNA	Phosphatidylinositol transfer protein alpha isoform	0.680682	Cytoplasm		0	0
Q8WXG6	MADD	MAP kinase-activating death domain protein	0.677834	Cytoplasm, Membrane		0	0
O43427	FIBP	Acidic fibroblast growth factor intracellular-binding protein	0.673547	Nucleus, Endomembrane system		0	0
O43299	AP5Z1	AP-5 complex subunit zeta-1	0.661972	Nucleus, Cytoplasm		0	0
Q16706	MAN2A1	Alpha-mannosidase 2	0.659084	Golgi apparatus membrane	TMH	1	3	QFTVFGSAIFCVVIFSLYLML	6 - 26
Q12962	TAF10	Transcription initiation factor TFIID subunit 10	0.656751	Nucleus		0	0
Q9BXV9	C14orf142	Uncharacterized protein C14orf142	0.653131			0	0
O14745	SLC9A3R1	Na(+)/H(+) exchange regulatory cofactor NHE-RF1	0.648429	Apical cell membrane, Ruffle, Filopodium, Cytoplasm, Cell projection, Microvillus, Endomembrane system		0	0
Q96EL2	MRPS24	28S ribosomal protein S24, mitochondrial	0.647699	Mitochondrion		0	0
P33316	DUT	Deoxyuridine 5'-triphosphate nucleotidohydrolase, mitochondrial	0.646968	Nucleus, Mitochondrion		0	0
Q96IU4	ABHD14B	Protein ABHD14B	0.645818	Nucleus, Cytoplasm		0	0
Q9Y2H6	FNDC3A	Fibronectin type-III domain-containing protein 3A	0.644019	Golgi apparatus membrane	TMH	1	0	ILVLFAFFSILIAFIIQYFVI	1177 - 1197
Q8N5A5	ZGPAT	Zinc finger CCCH-type with G patch domain-containing protein	0.643314	Nucleus		0	0
P14735	IDE	Insulin-degrading enzyme	0.641226	Cell membrane, Cytoplasm, Secreted		0	0
Q9BQ70	TCF25	Transcription factor 25	0.639688	Nucleus		0	0
P31327	CPS1	Carbamoyl-phosphate synthase [ammonia], mitochondrial	0.637207	Nucleus, Mitochondrion, Nucleolus		0	3
P19784	CSNK2A2	Casein kinase II subunit alpha'	0.635809			0	0
Q9H3P7	ACBD3	Golgi resident protein GCP60	0.634249	Mitochondrion, Golgi apparatus membrane		0	0
Q9ULA0	DNPEP	Aspartyl aminopeptidase	0.630966	Cytoplasm		0	0
Q12893	TMEM115	Transmembrane protein 115	0.629959	Golgi apparatus, Golgi stack membrane	TMH	4	0	SVVVKALCAAVLFLYLLSFAV	20 - 40
Q14699	RFTN1	Raftlin	0.619885	Cell membrane		0	0
P49770	EIF2B2	Translation initiation factor eIF-2B subunit beta	0.613625			0	0
Q9BRK5	SDF4	45 kDa calcium-binding protein	0.610419	Cytoplasm, Cell projection, Bleb, Golgi apparatus lumen, Cell membrane	SP	0	1	MVWPWVAMASRWGPLIGLAPCCLWLLGAVLLMDASA
P35914	HMGCL	Hydroxymethylglutaryl-CoA lyase, mitochondrial	0.603076	Mitochondrion matrix, Peroxisome		0	0
P49441	INPP1	Inositol polyphosphate 1-phosphatase	0.600216			0	0
O14733	MAP2K7	Dual specificity mitogen-activated protein kinase kinase 7	0.600044	Nucleus, Cytoplasm		0	0
Q9UDY4	DNAJB4	DnaJ homolog subfamily B member 4	0.595339	Cytoplasm, Cell membrane		0	0
P05783	KRT18	Keratin, type I cytoskeletal 18	0.592479	Nucleus, Perinuclear region, Cytoplasm, Nucleolus		0	3
P48200	IREB2	Iron-responsive element-binding protein 2	0.586914	Cytoplasm		0	0
Q8WXF1	PSPC1	Paraspeckle component 1	0.585131	Cytoplasm, Nucleus matrix, Nucleus speckle, Nucleus, Nucleolus		0	0
P51692	STAT5B;STAT5A	Signal transducer and activator of transcription 5B	0.582787	Nucleus, Cytoplasm		0	0
P62993	GRB2	Growth factor receptor-bound protein 2	0.580707	Cytoplasm, Nucleus, Endosome, Golgi apparatus		0	0
Q9NVA1	UQCC1	Ubiquinol-cytochrome-c reductase complex assembly factor 1	0.577376	Mitochondrion inner membrane, Cytoplasmic vesicle		0	0
Q7Z6J0	SH3RF1	E3 ubiquitin-protein ligase SH3RF1	0.573921	Lamellipodium, trans-Golgi network, Golgi apparatus, Cytoplasm, Perinuclear region, Cell projection		0	0
P50502	ST13;ST13P5;ST13P4	Hsc70-interacting protein	0.573318	Cytoplasm		0	0
Q6PCB5	RSBN1L	Round spermatid basic protein 1-like protein	0.571844	Nucleus		0	0
Q9UHI6	DDX20	Probable ATP-dependent RNA helicase DDX20	0.568081	Cytoplasm, Nucleus, Gem		0	0
P38606	ATP6V1A	V-type proton ATPase catalytic subunit A	0.563157			0	0
O00425	IGF2BP3	Insulin-like growth factor 2 mRNA-binding protein 3	0.559681	Cytoplasm, Nucleus		0	0
Q9NP58	ABCB6	ATP-binding cassette sub-family B member 6, mitochondrial	0.55598	Mitochondrion outer membrane, Golgi apparatus membrane, Endoplasmic reticulum membrane, Endosome membrane, Cell membrane	TMH	10	0	FFFTLVPSTRMALGTLALVLA	27 - 47
Q66K14	TBC1D9B	TBC1 domain family member 9B	0.555052	Membrane	TMH	1	0	LSWFLTLFLSVMPFESAVVIV	668 - 688
Q9NWZ5	UCKL1	Uridine-cytidine kinase-like 1	0.547837	Cytoplasm, Nucleus		0	0
Q9P0I2	EMC3	ER membrane protein complex subunit 3	0.541205	Membrane	TMH	2	0	LWVVLPIVIITFFVGMIRHYV	14 - 34
P18031	PTPN1	Tyrosine-protein phosphatase non-receptor type 1	0.53726	Endoplasmic reticulum membrane		0	0
Q13630	TSTA3	GDP-L-fucose synthase	0.534423			0	0
Q13228	SELENBP1	Selenium-binding protein 1	0.533013	Cytosol, Cytoplasm, Nucleus, Membrane		0	0
Q8WZ82	OVCA2	Esterase OVCA2	0.528213			0	0
O75347	TBCA	Tubulin-specific chaperone A	0.524761	Cytoplasm, Cytoskeleton		0	0
Q9BPX5	ARPC5L	Actin-related protein 2/3 complex subunit 5-like protein	0.521179	Cytoskeleton, Cytoplasm		0	0
P11310	ACADM	Medium-chain specific acyl-CoA dehydrogenase, mitochondrial	0.519632	Mitochondrion matrix		0	0
Q86U28	ISCA2	Iron-sulfur cluster assembly 2 homolog, mitochondrial	0.515056	Mitochondrion		0	0
P08727	KRT19	Keratin, type I cytoskeletal 19	0.51023			0	0
Q68D10	SPTY2D1	Protein SPT2 homolog	0.510126	Nucleus, Nucleolus		0	0
Q9H6V9	C2orf43;FLJ21820	Lipid droplet-associated hydrolase	0.508744	Lipid droplet, Endoplasmic reticulum		0	0
Q8N4Q1	CHCHD4	Mitochondrial intermembrane space import and assembly protein 40	0.505698	Mitochondrion intermembrane space		0	0
Q6NUK4	REEP3	Receptor expression-enhancing protein 3	0.5047	Endoplasmic reticulum membrane	TMH	3	0	MVSWMISRAVVLVFGMLYPAY	1 - 21
Q6P996	PDXDC1	Pyridoxal-dependent decarboxylase domain-containing protein 1	0.500934			0	0
P24752	ACAT1	Acetyl-CoA acetyltransferase, mitochondrial	0.491274	Mitochondrion		0	0
Q8WVJ2	NUDCD2	NudC domain-containing protein 2	0.483318	Chromosome, Cytoskeleton, Centromere, Centrosome, Kinetochore, Cytoplasm, Microtubule organizing center, Spindle pole		0	0
Q9HAB8	PPCS	Phosphopantothenate--cysteine ligase	0.482741			0	0
Q9HCJ3	RAVER2	Ribonucleoprotein PTB-binding 2	0.467326	Cytoplasm, Nucleus		0	0
Q92783	STAM	Signal transducing adapter molecule 1	0.464007	Early endosome membrane, Cytoplasm		0	0
Q5T1M5	FKBP15	FK506-binding protein 15	0.447147	Early endosome, Cytoplasm, Cell projection, Axon		0	0
P42126	ECI1;DCI	Enoyl-CoA delta isomerase 1, mitochondrial	0.430568	Mitochondrion matrix		0	0
O95218	ZRANB2	Zinc finger Ran-binding domain-containing protein 2	0.410037	Nucleus		0	0
P61981	YWHAG	14-3-3 protein gamma	0.409302	Cytoplasm		0	0
P08240	SRPR	Signal recognition particle receptor subunit alpha	0.403796	Endoplasmic reticulum membrane		0	0
O00469-2	PLOD2	Procollagen-lysine,2-oxoglutarate 5-dioxygenase 2	0.390512	Rough endoplasmic reticulum membrane	SP	0	7	MGGCTVKPQLLLLALVLHPWNPCLG
Q8TCS8	PNPT1	Polyribonucleotide nucleotidyltransferase 1, mitochondrial	0.380836	Cytoplasm, Mitochondrion, Mitochondrion intermembrane space		0	0
O00233	PSMD9	26S proteasome non-ATPase regulatory subunit 9	0.364237			0	0
Q92945	KHSRP	Far upstream element-binding protein 2	0.35978	Nucleus, Cytoplasm		0	0
P49588	AARS	Alanine--tRNA ligase, cytoplasmic	0.32871	Cytoplasm		0	0
