# Supplementary material for: Quantitative Proteomics and Differential Protein Abundance Analysis after Depletion of Putative mRNA Receptors in the ER Membrane of Human Cells Identifies Novel Aspects of mRNA Targeting to the ER
Source: Molecules. 2021 Jun 11;26(12):3591. doi: 10.3390/molecules26123591 (PMC8230838; doi:10.3390/molecules26123591)
Supplement: Supplementary file 1 [file molecules-26-03591-s001.zip › Table S4_KTN1_all.xlsx]

## Sheet: Sheet 1 - kinectin_all_summary_
ID	Gene name	Fold change	Neg. log10 p-value 1	Neg. log10 p-value 2
P52735	VAV2	-0.1328	0.2931	0.5003
Q8NHP6	MOSPD2	-0.3347	1.1915	0.8076
P82675	MRPS5	0.0338	0.0639	0.3137
Q9Y5L0	TNPO3	-0.0966	0.5202	0.2041
D6R9J0	PCYOX1L	0.2866	1.7324	0.0179
Q9UQR1	ZNF148	-0.2616	0.4519	1.067
Q9H3N1	TMX1	0.0881	0.0093	0.511
Q9Y4R8	TELO2	-0.6417	1.2885	1.0266
Q9H2P0	ADNP	-0.183	0.6039	0.5768
Q8TAF3	WDR48	-0.8634	2.5542	0.9583
P30825	SLC7A1	-0.2575	1.1311	2.3142
Q01844	EWSR1	-0.0824	0.201	0.1539
Q9Y6W5	WASF2	0.3761	0.1473	2.123
P42785	PRCP	0.1559	0.1507	0.6859
Q9NYV4	CDK12	0.037	0.0123	0.3085
O60701	UGDH	0.3063	1.9	1.1578
Q9UBQ6	EXTL2	0.29	1.8916	0.2724
Q14671-2	PUM1	-0.1267	0.1901	0.3632
P11137	MAP2	-0.3294	0.0591	1.262
Q9UJX5	ANAPC4	0.2589	0.0593	0.5511
Q9BSH4	TACO1	-0.0363	0.9981	0.4674
O95486	SEC24A	0.6092	1.3347	3.0739
Q9BQ75	CMSS1	-0.0625	0.065	0.3328
Q969P6	TOP1MT	-0.0718	1.0868	0.1974
Q86Y82	STX12	0.6653	1.0864	2.3429
Q9NV31	IMP3	0.207	0.0113	0.8405
Q00765	REEP5	-0.0005	0.3945	0.3687
Q3V6T2	CCDC88A	-0.1381	0.1082	0.5401
Q15633	TARBP2	0.1226	1.1813	0.0536
P54105	CLNS1A	-0.344	1.6117	0.3175
P61077	UBE2D3;UBE2D2	-0.1274	0.8581	0.0285
Q8N0U8	VKORC1L1	0.0732	0.3468	0.1267
Q10713	PMPCA	0.0492	0.0502	0.2505
Q6IN85	SMEK1	0.1891	0.3691	0.9709
Q9Y6N1	COX11	0.527	0.4507	1.7174
O14662	STX16;STX16-NPEPL1	0.5967	0.3039	1.2763
Q01415	GALK2	0.5439	0.9819	0.5687
P30520	ADSS	0.1409	1.0948	0.0902
O75448	MED24	-0.4672	0.6823	2.1052
O95801	TTC4	-0.3049	1.4815	0.2377
Q13505	MTX1	0.1943	0.2424	0.8304
P22102	GART	-0.186	0.724	0.7153
Q9BY43	CHMP4A	-0.2294	0.4863	0.8171
Q9GZN8	C20orf27	0.0515	0.1627	0.1307
P33897	ABCD1	0.3221	0.3121	2.4241
Q68CQ7	GLT8D1	0.56	0.3898	1.7583
Q9NYU1	UGGT2	0.1502	0.2144	0.5299
O94905	ERLIN2	-0.2553	0.8247	2.7508
Q9H299	SH3BGRL3	0.0685	0.5666	0.0433
Q15021	NCAPD2	-0.1832	0.8172	0.8195
P82650	MRPS22	0.0294	0.0161	0.1484
Q9Y639	NPTN;DKFZp566H1924	0.3759	1.1664	0.7681
Q96T23	RSF1	-0.0413	0.9263	0.7379
P14618-2	PKM;PKM2	-0.5837	1.3876	0.347
Q9H9Q2	COPS7B	-0.7349	1.5223	1.7075
O15397	IPO8	-0.2015	0.3906	1.0337
P14649	MYL6B	0.0734	0.5997	0.8347
J3KN10	PI4KA	-0.9754	2.1641	6.1902
Q8TAA5	GRPEL2	-0.9127	4.5704	4.0058
Q86TI2	DPP9	-0.1228	0.3754	0.03
Q15031	LARS2	0.0669	0.4738	0.9253
Q15004	KIAA0101	0.156	0.1298	1.1313
O75431	MTX2	-0.0809	0.1223	0.4333
Q13572	ITPK1	-0.1265	0.5057	0.2058
Q8NEM2	SHCBP1	0.04	0.4325	0.5657
P14927	UQCRB	-0.0245	0.0541	0.0538
Q92974	ARHGEF2	0.3076	1.0092	0.6451
Q71DI3	HIST2H3A	-0.158	0.1985	0.865
Q6ZRQ5	MMS22L	0.0934	0.0882	0.6592
Q9UGR2	ZC3H7B	-0.3105	0.5537	0.97
Q5T6F2	UBAP2	-0.1406	0.6225	0.1233
P63220	RPS21	0.088	0.4655	0.0394
Q9ULF5	SLC39A10	0.2258	0.3046	1.7032
Q8IXM6	NRM	-1.0326	0.0087	6.7756
P51553	IDH3G	0.0912	0.042	0.3825
P55010	EIF5	0.0398	0.9327	0.4532
Q14498	RBM39;RNPC2	-0.1761	1.3441	0.2822
Q9NXF7	DCAF16	0.6197	4.5141	2.6263
P30050	RPL12	-0.1266	0.065	0.8705
Q96QR8	PURB	0.1151	1.9559	0.9973
Q96J42	TXNDC15	0.7728	0.9939	4.6803
Q7Z569	BRAP	-0.0168	0.2486	0.2781
Q99985	SEMA3C	-0.0685	0.3094	0.0409
O95347	SMC2	-0.1255	0.2172	0.6001
Q9Y2G8	DNAJC16	0.3879	0.5665	0.901
Q8N5P1	ZC3H8	-0.0513	0.1532	0.0847
Q9UGI8	TES	-0.3197	0.6138	1.3093
O00330	PDHX	0.2402	0.7688	1.0318
Q14644	RASA3	-0.2626	0.2429	0.8099
Q9Y2R4	DDX52	-0.1563	0.2825	0.3312
Q99988	GDF15	1.5562	0.0056	4.7439
Q9Y4B6	VPRBP	0.0772	0.2604	0.0741
Q96LT9	RNPC3	-0.5448	0.1609	0.5438
Q9UIL1	SCOC	-0.2133	0.929	0.2669
Q02543	RPL18A	0.2329	1.5522	0.3922
Q96RS6	NUDCD1	0.1014	0.6076	0.1042
P62244	RPS15A	0.0659	0.2397	0.1441
O14578-4	CIT	-0.0409	0.9909	0.9779
P14384	CPM	0.0665	1.253	0.8717
O60493	SNX3	0.2831	0.5663	1.3588
Q9H4A4	RNPEP	-0.182	0.0129	1.45
Q9Y4X0	AMMECR1	0.3281	0.1697	1.6963
Q53HL2	CDCA8	0.0548	1.456	1.1906
P61964	WDR5	-0.2069	0.5415	0.4016
P15144	ANPEP	-0.0426	3.1337	2.3287
Q96G46	DUS3L	0.1573	0.0217	0.4482
P49916	LIG3	-0.1648	0.817	0.4147
Q6P6C2	ALKBH5	-0.3327	0.5284	0.3565
Q9UIC8	LCMT1	-0.31	1.8247	0.1258
Q8N9N8	EIF1AD	0.2189	0.577	0.2572
O43242	PSMD3	0.1376	0.013	1.0931
P53621	COPA	0.3324	1.5716	1.4217
P20618	PSMB1	-0.1521	0.1271	0.8967
Q15382	RHEB	0.1719	0.1016	1.2975
Q9UBB5	MBD2	0.0232	0.1775	0.3009
P42575	CASP2	-0.5615	0.168	3.1237
Q53H12	AGK	0.2035	0.7901	0.8
P62875	POLR2L	-0.0495	0.1657	0.1032
Q8NEF9	SRFBP1	0.3514	0.4269	1.1185
Q9NQ48	LZTFL1	-0.1308	0.1251	0.5114
O43747	AP1G1	-0.2605	2.1647	0.3813
Q07021	C1QBP	0.015	0.1786	0.096
P15336	ATF2	0.2366	0.1462	1.1004
Q9Y399	MRPS2	-0.161	0.3189	0.4367
P00558	1	-0.1926	1.3344	0.2529
O15357	INPPL1	0.1295	0.6025	0.4337
P31937	HIBADH	-0.1867	0.0358	1.3844
P25205	MCM3	-0.0075	0.0112	0.0293
Q9H3H3	C11orf68	-0.0472	0.3624	0.1384
Q86W92-2	PPFIBP1	-0.1932	0.3752	0.8139
Q9H089	LSG1	0.082	0.1614	0.5536
P35232	PHB	-0.2113	1.818	0.3397
Q9H910	HN1L	-0.2455	0.0184	1.965
P52209	PGD	-0.068	0.0224	0.5761
A6NKV8	PAIP1	-0.0435	0.115	0.0707
O75909	CCNK	-0.1931	0.3142	0.2784
P32121	ARRB2;DKFZp686L0365	0.1074	0.018	0.3435
Q8ND24	RNF214	-0.117	0.1951	0.7206
O75616	ERAL1	-0.0772	0.1436	0.3377
O14777	NDC80	0.3355	2.074	0.6328
Q8N1G4	LRRC47	0.0387	0.1232	0.3042
Q8NBP7	PCSK9	1.032	2.3609	6.2775
P04406	GAPDH	-0.5402	0	5.9189
P46736	BRCC3	-0.3046	0.3154	1.3213
Q9Y5K6	CD2AP	0.0026	0.1598	0.1042
Q15637-4	SF1	-0.2557	0.4734	1.011
O94763	URI1	-0.212	0.7236	0.5476
Q9Y6A4	CFAP20	0.079	0.0835	0.4017
Q8TEW0	PARD3	0.1894	0.1467	0.5971
Q9UHY8	FEZ2;DKFZp779C2259	0.4575	2.6809	0.5007
Q5M775	SPECC1	0.1866	0.2054	0.3123
Q13541	EIF4EBP1	-0.3769	0.5227	1.3893
Q9NWS0	PIH1D1	-0.0789	0.8846	0.0341
Q9BWE0	REPIN1	0.2237	0.4356	1.0966
Q9H1A4	ANAPC1	0.0895	1.1207	0.334
O14519	CDK2AP1	-0.0779	0.432	0.0273
P41252	IARS	-0.0169	0.0391	0.0736
Q9Y5J7	TIMM9	0.4184	0.5994	1.0701
P13010	XRCC5	0.0842	0.726	0.0701
P36969	GPX4	0.355	0.9122	1.0185
P22234	PAICS	-0.2402	0.5571	1.1862
Q8IZH2	XRN1	0.5	0.9454	1.0384
O75446	SAP30	-0.0638	0.063	0.3953
O43823	AKAP8	-0.0152	0.3103	0.2927
Q6ZSZ5	ARHGEF18	0.1984	0.2498	1.1448
O60671	RAD1	0.3536	1.3	0.951
Q7Z6J9	TSEN54	-0.1806	0.6149	0.4422
P56381	ATP5E;ATP5EP2	-0.1974	0.0699	0.504
O95071	UBR5	0.0462	0.0548	0.3462
P63098	PPP3R1;WDR92	0.2111	0.6576	0.2895
P19105	MYL12A	0.4346	1.5589	0.3908
Q93050	ATP6V0A1	0.5712	2.8158	0.8016
P20839	IMPDH1	0.0355	0.3349	0.0533
Q92542	NCSTN	-0.0269	0.1312	0.3142
P18031	PTPN1	0.5893	1.2989	1.5256
Q9HAV0	GNB4	-0.0538	0.0313	0.0191
Q8NHG8	ZNRF2	-0.2092	1.1653	0.0522
Q13503	MED21	-0.0086	0.1323	0.2329
Q9H583	HEATR1	0.0796	0.5004	0.0813
Q9NPL8	TIMMDC1	-0.0283	0.2096	0.1019
P06744	GPI	-0.1412	1.3412	0.1439
Q9UBB6	NCDN	0.4663	2.0662	0.2389
P32322	PYCR1	0.0649	0.3361	0.0869
Q9UJY5	GGA1	0.8876	2.3995	3.0792
P14868	DARS	-0.0504	0.2101	0.1834
Q9Y6B6	SAR1B;DKFZp434B2017	0.0494	0.0252	0.2099
Q8N543	OGFOD1	0.2966	1.5472	0.3394
P49589	CARS	0.3173	2.1801	0.1623
Q9H6E4	CCDC134	0.1494	0.3734	0.6212
Q9BV44	THUMPD3	-0.5964	1.2151	2.7093
P61011	SRP54	-0.1306	0.7419	0.2053
Q13867	BLMH	-0.4385	0.8453	1.8421
P08047	SP1	0.2688	0.3948	0.5946
Q9GZS3	WDR61	-0.0242	0.2542	0.0614
Q13363	CTBP1	0.2056	1.0011	0.4137
Q14738	PPP2R5D	0.1172	0.3429	0.3718
Q8N999	C12orf29	-1.0001	2.5336	1.1935
P39687	ANP32A	-0.2313	0.7634	0.7398
Q86U44	METTL3	-0.165	0.042	0.7639
Q9H967	WDR76	0.1129	0.1058	0.9403
P55735	SEC13	-0.095	0.2467	0.247
Q9H4F8	SMOC1	0.4468	0.6047	1.951
O43237	DYNC1LI2	0.1749	0.2024	0.833
Q9NPJ8-2	NXT2	-0.0457	0.0153	0.0319
P00505	GOT2	0.1081	0.2134	0.4457
P62987	UBA52;UBB;RPS27A;UBC;UBBP4	-2.2727	0.5665	6.711
Q92575	UBXN4	0.4247	1.0552	0.9493
Q9Y4P3	TBL2	0.2126	0.4817	0.7058
Q9NTG7	SIRT3	-1.1754	0.2742	1.4854
P42771	CDKN2A	-0.0825	0.0079	0.5336
Q8N183	NDUFAF2	0.0082	0.35	0.3185
Q5JRX3	PITRM1	-0.007	0.4285	0.4109
P50897	PPT1	0.0463	0.3165	0.5401
Q99417	MYCBP	-0.278	0.1601	2.4259
Q8N806	UBR7	0.6849	0.7001	2.1389
Q12874	SF3A3	-0.1	0.1543	0.571
Q96IK1	BOD1	0.0156	0.2753	0.2884
O95865	DDAH2	0.3857	1.9458	0.62
Q8NBN3	TMEM87A	0.5767	2.4386	0.7406
Q7Z4H3	HDDC2	-0.0638	0.0031	0.0329
Q99808	SLC29A1	0.196	1.8538	0.2471
Q4VC31	CCDC58	0.0437	0.1515	0.077
P42224	STAT1	0.1898	0.9682	0.3734
Q9Y2R0	COA3	-0.3296	1.1034	0.1303
Q16880	UGT8	0.8558	2.1807	2.2543
P11387	1	-0.091	0.0644	0.6123
Q14344	GNA13	-0.4783	1.7064	0.305
Q00577	PURA	-0.1012	0.6548	0.1025
Q99598	TSNAX	0.1023	0.5491	0.0829
Q12792	TWF1	-0.4181	2.3866	0.721
P63165	SUMO1	-0.2229	0.087	1.4982
P43243	MATR3	-0.0525	0.4515	0.0276
Q92995	USP13	-0.3054	0.5497	2.071
Q5RKV6	EXOSC6	-0.2125	0.3642	0.7096
Q16527	CSRP2	0.2006	0.8517	1.7479
O75390	CS	-0.1833	0.0657	1.3717
O43320	FGF16	-1.5678	0.1062	9.6374
Q9NP58	ABCB6	-0.3276	2.8755	0.292
Q9NP72	RAB18	0.233	0.0943	1.8688
P40616	1	-0.1487	2.0796	0.5516
P09972	ALDOC	-0.2343	3.6048	0.875
O15230	LAMA5	0.2103	0.0634	0.7047
Q9Y5X3	SNX5	-0.0401	0.297	0.4142
O00231	PSMD11	-0.0032	0.051	0.0228
Q96JB2	COG3	0.0954	0.0706	0.3045
Q9P2R7	SUCLA2	0.2923	1.101	1.2006
Q99871	HAUS7	0.5252	0.7828	1.5161
Q15428	SF3A2	-0.2662	1.2708	0.8785
O43715	TRIAP1	-0.1091	0.3027	0.2089
Q9Y5P4	COL4A3BP	0.4231	0.5122	2.381
Q9UMY1	NOL7	0.3865	1.1031	0.7894
Q8N5C6	SRBD1	-0.4148	0.1583	2.5864
Q8NCM8	DYNC2H1	-0.0055	0.156	0.1108
Q9BW91	NUDT9	0.0626	0.3223	0.6534
Q9BYV8	CEP41	0.1143	0.3688	1.1366
O95639	CPSF4	0.1569	0.454	0.4604
P41208	CETN2	-0.2692	0.3707	0.7715
Q03701	CEBPZ	-0.0664	0.3858	0.1476
P07311	ACYP1;FBN3	0.1045	0.082	0.1842
O60568	PLOD3	0.1251	0.4047	0.3886
P35606	COPB2	0.2411	1.0595	1.0864
Q6P2E9	EDC4	0.0631	0.0636	0.4788
Q99447	PCYT2	-0.2914	1.0664	0.982
P25398	RPS12	-0.0919	0.978	0.1439
Q9BXB4	OSBPL11	0.3065	0.1547	0.8304
Q8IWB1	ITPRIP	0.2341	0.1162	1.0767
Q9UBB4	ATXN10	0.1387	2.1791	0.4158
Q6WCQ1	MPRIP	-0.1429	0.1619	1.5144
Q8IYB3	SRRM1	-0.1967	1.1671	0.6147
P21127	CDK11B	0.1337	0.5379	0.1949
Q9UJX4	ANAPC5	-0.0064	0.5946	0.5557
Q05086	UBE3A	-0.0049	0.3932	0.4678
A8CG34	POM121C	0.2978	0.3295	2.1178
O60832	DKC1	-0.2713	0.5355	2.1392
Q9Y6N5	SQRDL	1.3668	3.7863	2.7895
Q16626	MEA1	-0.4243	0.884	1.2307
P17812	CTPS1	0.0858	0.6714	0.0148
O75496	GMNN	0.0931	0.6614	0.0104
B1ALY0	PALM2-AKAP2;PALM2	0.3236	0.854	0.6814
Q9BZZ5-2	API5	-0.0379	0.3713	0.096
P31749	AKT1	-0.5961	1.3449	0.0803
Q9NXC5	MIOS	-0.1185	0.9665	0.0159
Q96S55	WRNIP1	0.2518	0.6344	1.2423
Q13136	PPFIA1	-0.1407	0.8373	0.0673
Q9H9P8	L2HGDH	0.2703	1.3592	0.4655
Q9C0C2	TNKS1BP1	-0.1819	0.7716	0.3355
O75717	WDHD1	-0.1088	0.0922	0.3748
O43824	GTPBP6	-0.5794	0.0498	1.1949
Q92520	FAM3C	0.3264	0.6027	0.7061
P43487	RANBP1	0.0223	0.3507	0.4813
Q05655	PRKCD	0.022	0.154	0.1101
Q9UP95	SLC12A4;SLC12A6	1.0229	1.2435	4.6695
P78346	RPP30	0.0316	0.1018	0.1132
P33527	ABCC1	0.1454	0.2142	0.7485
Q8TB52	FBXO30	0.0014	0.1323	0.0763
P50402	EMD	0.2436	0.4017	0.8209
Q8WUF5	PPP1R13L	-0.0902	1.3813	0.4148
O15533	TAPBP	-0.2085	1.676	0.1094
P35527	KRT9	0.4412	0.0846	0.1672
Q12931	TRAP1	0.0654	0.3639	0.1638
P49590	HARS2	-0.1228	0.5912	0.2119
Q96AY3	FKBP10	0.0047	0.0845	0.0339
P62280	RPS11	0.1293	0.3431	0.5133
Q09472	EP300	-0.4149	1.5667	0.5992
Q05932	FPGS	0.153	0.5129	0.1453
Q9H0H5	RACGAP1	0.1133	0.0914	0.7059
O14556	GAPDHS	-3.3194	12.6053	10.5243
Q9UBI1	COMMD3	-0.1598	0.2098	0.5922
O15091	KIAA0391	-0.0051	0.4275	0.3251
Q9Y570	PPME1	0.073	0.4138	0.1093
P11274	BCR	-0.1081	0.058	0.4304
O14733	MAP2K7	-0.2518	1.592	0.1282
Q15014	MORF4L2	0.3063	1.3725	0.5513
P17301	ITGA2	0.5239	1.5572	1.4899
Q14135	VGLL4	-1.5528	7.5793	2.7579
P06454	PTMA	-0.2662	0.2479	0.074
Q8NEZ5	FBXO22	-0.1299	0.6519	0.2644
P61160	ACTR2	0.0774	0.9081	0.0816
Q8WTV0-2	SCARB1	0.8023	2.0958	1.4695
P13674-2	P4HA1	-0.037	3.2691	2.2121
P43308	SSR2	-0.2047	0.1018	0.2367
Q9Y320	TMX2	-0.0227	0.3571	0.4064
Q9Y224	C14orf166	0.091	0.6092	0.0976
Q04864	REL	0.4265	2.8456	0.1531
P02786	TFRC	0.2277	0.9665	1.0023
P35658	NUP214	-0.1151	0.3871	0.3219
Q9Y3L5	RAP2C	-0.078	0.3881	0.3592
Q8IXM3	MRPL41	0.0953	0.3861	0.1458
P24534	EEF1B2	0.0022	0.1302	0.0853
Q8WUM0	NUP133	-0.2294	0.1015	1.5295
O00592	PODXL	0.1318	0.4014	0.3898
Q03135	CAV1	0.0949	0.6718	0.0184
Q9NUQ6-2	SPATS2L	-0.2316	1.016	2.7947
Q1KMD3	HNRNPUL2;HNRNPUL2-BSCL2	0.06	0.2119	0.6206
B5MD87	PYCRL	-0.4679	1.7124	1.3344
Q71RC2	LARP4	-0.0343	0.0363	0.1722
Q9Y3D0	FAM96B	-0.0381	0.1243	0.0059
P54578	USP14	0.0847	0.3739	0.2396
Q9UI12	ATP6V1H	0.4068	0.6584	2.2078
Q9NVG8	TBC1D13	-0.0319	0.3306	0.6005
Q9Y512	SAMM50	0.2624	0.1162	1.4606
Q9P0V9	SEPT10	0.0902	0.931	0.1762
Q9BPX5	ARPC5L	-0.1099	0.6953	0.0898
Q6ZSJ8	C1orf122	-0.5902	0.6751	0.768
P78356	PIP4K2B	0.3218	0.2298	1.4653
P54136	RARS	0.1011	0.4768	1.1025
Q9GZM5	YIPF3	0.5259	0.877	2.0743
Q99717	SMAD5;SMAD1	-0.4228	0.908	1.1532
Q969M3	YIPF5	-0.0993	0.0396	0.1713
Q16576	RBBP7	0.0473	0.0371	0.2531
O60869	EDF1	0.1084	0.528	0.1055
P17252	PRKCA	-0.2514	0.5004	0.9534
Q9UGP4	LIMD1	0.367	0.6033	1.1562
Q5T8P6-3	RBM26	0.1766	0.3694	0.7551
P08236	GUSB	-0.4327	0.1278	2.8471
Q8NB16	MLKL	0.1884	0.7989	0.2721
Q8IWT0	ZBTB8OS	0.075	0.1107	0.2658
Q13610	PWP1	-0.1987	0.0275	0.4695
Q9UHI6	DDX20	0.5194	0.6728	1.3924
Q13492	PICALM	-0.0481	1.1774	0.5411
O75083	WDR1	0.156	0.6627	0.6302
Q6IQ49	SDE2	-0.6156	1.6609	1.3965
O15131	KPNA5	-0.3317	0.5464	2.1746
Q9BT78	COPS4	-0.0197	0.0904	0.0414
O15121	DEGS1	0.1461	0.1667	0.6691
Q6PJT7-9	ZC3H14	-0.215	0.4103	0.6268
P10644	PRKAR1A	-0.382	3.447	0.1553
Q9NQC3	RTN4	0.3421	0.8092	1.8307
Q8NE71	ABCF1	-0.2004	1.2817	0.6022
Q9NRG4	SMYD2	0.0167	0.2108	0.0337
Q86WR0	CCDC25	-0.242	0.5606	0.8946
Q14126	DSG2	-0.3841	3.1203	0.5176
P55769	NHP2L1	-0.1101	0.3782	0.1938
Q9Y276	BCS1L	0.1658	0.0895	0.7126
P08758	ANXA5	0.0877	0.0367	0.7463
Q9HDC9	APMAP	0.3348	1.5323	0.7325
Q658Y4	FAM91A1	0.5734	1.6135	0.7154
O14907	TAX1BP3	-0.0875	0.0031	0.2754
P18754	RCC1	-0.2789	1.2193	0.6671
P40424	PBX1	-0.7656	0.1371	3.1472
Q13084	MRPL28	0.0716	0.1511	0.3241
Q9BW60	ELOVL1	-0.0004	0.5168	0.3733
P30508	HLA-C	0.0645	0.3082	0.5987
O96000	NDUFB10	0.0742	0.1434	0.0996
P82932	MRPS6	0.1575	0.1967	0.4904
O43776	NARS	0.2459	1.2798	0.9439
P23526	AHCY	0.097	0.3858	0.3583
Q9H270	VPS11	0.1114	0.5766	0.216
Q8IY45	AMN1	0.1041	0.1092	0.4992
G3V325	ATP5J2-PTCD1;PTCD1	0.0884	0.0143	0.4718
Q8IZ69	TRMT2A	0.0702	0.0136	0.1549
P11717	IGF2R	0.6381	2.1749	3.3241
O00469-2	PLOD2	0.2275	0.6828	2.6876
Q9H0G5	NSRP1	0.1188	0.536	0.0133
P53990	IST1	0.0105	0.3339	0.2876
Q9UKD1	GMEB2;GMEB1	-0.725	0.6633	2.8919
P04259	KRT6B;KRT6A;KRT6C	0.562	1.5826	0.3999
O15126	SCAMP1	0.2463	0.0025	1.5432
Q9BTC8	MTA3	0.2951	0.7343	0.3994
P26368	U2AF2	-0.0937	0.6699	0.1706
O15228	GNPAT	-0.049	0.1856	0.4553
O95163	IKBKAP	0.1254	1.4784	0.1666
P30837	ALDH1B1	0.0639	0.1368	0.5907
P42166	TMPO	-0.0867	0.7381	0.0516
O60828	PQBP1	-0.1726	1.3728	0.0197
Q6P1J9	CDC73	-0.1699	0.4841	0.5831
P00338	LDHA	-0.0575	1.4471	0.6916
P14923	JUP	-0.4868	3.625	2.0036
P53985	SLC16A1	0.3684	0.8268	1.401
O75607	NPM3	-0.208	0.1997	1.2702
Q12824-2	SMARCB1	0.1975	0.0991	0.971
Q9NWM8	FKBP14	0.7968	0.1799	4.6824
Q8IYU8	MICU2	0.19	0.2669	0.3872
Q92615	LARP4B	0.2746	1.3479	0.3421
Q96GQ7	DDX27	-0.0696	0.2419	0.5424
Q659A1	ICE2	-0.0871	0.1231	0.3592
O43752	STX6	0.2146	0.4828	0.4043
Q14914	PTGR1	0.2444	0.5091	0.9549
Q9BW27	NUP85	-0.1268	0.2855	1.1259
Q13637	RAB32	0.2104	0.2316	1.7715
P54619	PRKAG1	0.1294	0.5942	0.0592
Q8N335	GPD1L	0.1871	1.5387	0.1972
Q9Y3B3	TMED7;TICAM2	0.0354	0.6297	0.3121
Q7Z4V5	HDGFRP2	-0.3535	1.1714	0.6604
Q9Y4H2	IRS2	-0.4149	0.088	1.2006
Q9Y6W3	CAPN7	0.1797	0.721	0.4756
Q9Y312	AAR2	-0.0838	0.3009	0.615
Q9Y232-2	CDYL	-0.0984	0.0121	0.4956
Q9H993	C6orf211	0.1386	0.6247	0.0811
Q9BV57	ADI1	0.3242	0.5979	0.6983
P55210	CASP7	0.4558	1.6515	1.2084
Q12904	AIMP1	0.0615	0.2181	0.5178
Q02978	SLC25A11	0.1174	0.4309	0.3173
Q9UBS4	DNAJB11	0.1518	0.0324	0.8424
O43447	PPIH	-0.1471	0.2567	0.3146
Q06546	GABPA	-0.3942	0.9677	2.2602
Q08257	CRYZ	0.0253	0.3846	0.4712
P41567	EIF1	-0.3536	0.7173	0.7334
Q8NDT2	RBM15B	0.0243	0.5293	0.3929
H3BQL2	GOLGA8T;GOLGA8H;GOLGA8K	1.758	7.8832	0.7224
Q6Y288	B3GALTL	0.3392	1.1238	1.1377
Q92797	SYMPK	-0.3712	0.5558	2.0499
P62277	RPS13	0.0222	0.2618	0.0834
O95671	ASMTL	-0.2432	0.8712	0.4382
Q96ME7	ZNF512	-0.7954	2.1829	1.3899
Q15582	TGFBI	-0.6821	3.0126	1.4792
Q96GK7	FAHD2A;FAHD2B	-0.0897	0.9261	0.3355
P05198	EIF2S1	0.0355	0.41	0.544
Q08378	GOLGA3	0.5645	0.8562	4.6199
P08107	HSPA1A	-0.0318	0.1511	0.0991
Q9Y2A7	NCKAP1	-0.1689	1.0794	0.1061
Q99714	HSD17B10	0.0496	0.1758	0.4835
Q9H3Q1	CDC42EP4	-0.5585	1.2341	1.8339
Q14119	VEZF1	-0.3097	0.4339	1.0952
Q9NVH2	INTS7	0.0318	0.0634	0.1749
Q8IWJ2	GCC2	-0.0294	0.0064	0.3199
P68371	TUBB4B	0.0983	0.5115	0.1966
O43396	TXNL1	0.0116	0.1207	0.0268
Q14653	IRF3	0.0988	0.1966	0.3233
P15927	RPA2	0.2501	0.9308	0.5758
P62937	PPIA	-0.0932	0.2406	0.336
H0Y7C1	ATP1A2	0.1101	0.6064	0.0687
Q14061	COX17	0.0299	0.2235	0.2292
Q99436	PSMB7	-0.3267	0.4033	1.9001
J3QLN8	AURKB	-0.0851	0.2641	0.8661
Q9P2X3	IMPACT	0.2785	1.7898	0.0212
Q9NR12	PDLIM7	-0.0621	0.0071	0.3293
Q9NSV4	DIAPH3	-0.1881	0.6854	1.8724
Q52LJ0-2	FAM98B	-0.1515	0.4244	0.4724
P40926	MDH2	0.1153	0.0358	0.8111
P10176	COX8A	-0.4189	2.0421	0.3291
P18074	ERCC2	0.0006	0.5666	0.3232
P51965	UBE2E1	-0.2798	0.7347	1.3763
P62750	RPL23A	0.0401	0.1297	0.0796
O43674	NDUFB5	0.6532	0.7254	1.1429
P82094	TMF1	-0.6143	1.9067	3.3208
Q15370	TCEB2	0.3017	0.6387	1.5864
Q13685	AAMP	0.0638	0.52	0.0412
Q96AT9	RPE	0.1928	0.378	0.8487
O43854	EDIL3	-0.1122	0.5089	1.1215
Q68CQ4	DIEXF	-0.0961	0.47	1.2875
P30838	ALDH3A1	0.4743	1.5663	2.4422
O60504	SORBS3	0.9081	4.3617	4.0791
Q04323	UBXN1	0.0275	0.2825	0.4554
P30048	PRDX3	0.0747	0.1725	0.3316
Q08AD1	CAMSAP2	1.6228	0.6663	1.657
Q9C0E8	LNP	0.313	0.9001	1.6285
Q7Z460	CLASP1	0.1386	0.521	0.2876
Q9H4H8	FAM83D	0.0372	0.3338	0.0041
P62753	RPS6	-0.0077	0.1284	0.1122
Q12905	ILF2	-0.2196	0.5157	1.2253
P25208	NFYB	0.0034	0.0979	0.0814
Q9Y6A5	TACC3	-0.982	1.2673	1.5057
Q6EMK4	VASN	0.2694	1.3827	0.3824
P00918	CA2	-0.5131	3.7077	0.4942
Q9UL26	RAB22A	0.0309	0.3238	0.0152
Q8IYL3	C1orf174	-0.1892	0.5867	0.9706
Q9HBH5	RDH14	0.8831	1.2245	1.2925
F6V707	TPD52L1	0.0721	0.5905	0.0105
Q9NR45	NANS	0.0887	0.1605	0.4782
Q96CW1	AP2M1	0.059	0.3017	0.5698
O15372	EIF3H;EIF3S3	0.1013	0.4627	0.1971
Q9Y6H1	CHCHD2;CHCHD2P9	0.2229	0.0665	1.2002
O00506	STK25	0.7049	0.9843	1.7973
Q7Z739	YTHDF3	-0.1901	0.8019	0.3235
P25786	PSMA1	-0.1404	0.2776	0.6785
Q9BS26	ERP44	0.1216	0.0255	0.8606
P37802	TAGLN2	-0.1104	0.2716	0.5734
Q9NX63	CHCHD3	0.3259	0.3151	1.6232
Q9BQ52	ELAC2	-0.1329	0.0355	0.8282
O95864	FADS2	0.1253	0.3463	1.3109
Q93008	USP9X	0.0332	0.1673	0.0201
Q6NXR4	TTI2	-0.5634	1.3236	1.7582
Q9NQ88	TIGAR	0.2407	1.0834	0.1893
Q8TDQ7	GNPDA2	-0.126	0.3645	0.0716
P05787	KRT8	0.3271	2.5421	1.0199
Q8WTS6	SETD7	0.4475	0.1787	2.0402
Q5JUR7	TEX30	-0.0743	0.7279	0.1139
Q9NXE4	SMPD4	0.2659	0.7289	0.6643
O60870	KIN	0.8735	2.1834	2.5403
P09669	COX6C	-0.0054	0.3927	0.2953
Q9UJ70	NAGK	0.8384	2.231	0.4284
P62913	RPL11	0.1067	0.4732	0.1827
O95900	TRUB2	-0.0827	0.3045	1.0605
Q9Y547	HSPB11	0.1195	0.1259	0.4885
Q9ULX6	AKAP8L	0.1171	0.4924	1.206
O43598	DNPH1	0.0877	0.3339	0.1524
Q8NI22	MCFD2	-0.3576	2.4767	0.3445
Q7Z4Q2	HEATR3	-0.4093	0.1234	2.2857
Q8NEB9	PIK3C3	0.2143	0.3383	0.7133
Q96P48	ARAP1	-0.0213	0.1164	0.0541
Q96QD8	SLC38A2	-0.1219	0.0159	0.0426
Q5K651	SAMD9	0.2072	0.0329	0.8322
Q9NXV6	CDKN2AIP	0.1043	1.2427	0.4163
Q14534	SQLE	0.9725	0.071	7.7301
Q96SI9	STRBP	-0.0001	0.4928	0.2385
Q9H9Y6	POLR1B	-0.4189	0.8865	1.1691
Q13309	SKP2	-0.3894	0.6329	3.7716
Q9BRP8	WIBG	0.0565	0.0543	0.2313
Q96ME1-4	FBXL18	-0.3287	0.0264	1.4299
P78344	EIF4G2	0.0296	0.0097	0.2027
P06733	ENO1	0	0	0
Q5VW38	GPR107	0.8438	0.6881	2.8277
Q5JTV8	TOR1AIP1	0.3972	1.8838	1.4335
P02533	KRT14	-0.4073	0.4957	0.0441
Q92564	DCUN1D4	0.7227	1.0131	2.3306
Q9UHR4	BAIAP2L1	-0.321	0.4215	1.3447
Q96A33	CCDC47	0.4171	1.4054	1.4946
P24666	ACP1	-0.2016	0.9932	0.1377
P02795	MT2A;MT1X;MT1G	-0.5168	0.254	2.8565
P49406	MRPL19	-0.004	0.3412	0.2653
Q02952	AKAP12	-0.6136	1.7034	2.1186
O60216	RAD21	-0.2603	1.1378	0.91
Q8NF91	SYNE1	-0.1685	2.1005	0.4041
P52292	KPNA2	0.0562	0.657	0.189
Q6GQQ9	OTUD7B;OTUD7A	-0.1162	0.0602	0.1388
Q9H1E5	TMX4	-0.2117	0.429	0.654
Q5T1C6	THEM4	0.5348	0.0894	2.2126
P11279	LAMP1	0.2766	0.4914	0.8373
P20336	RAB3A	0.0317	0.0547	0.103
Q9Y450	HBS1L	0.0647	0.0419	0.3605
Q7Z2T5	TRMT1L	-0.468	0.3872	0.2801
Q8WUR7	C15orf40	-0.0519	0.2834	0.0488
Q9Y2S7	POLDIP2	-0.1162	0.611	0.1558
Q15185	PTGES3	-0.0365	0.4329	0.1117
G3V1K3	PON2	-1.0662	10.2412	0.9635
P35611	ADD1	0.0906	1.1609	0.356
Q96FW1	OTUB1	0.1085	0.8693	0.004
P21926	CD9	0.3187	1.851	0.1826
P49748	ACADVL	0.1058	0.4645	0.2765
P00491	PNP	0.0837	0.0918	0.7022
Q9BQL6	FERMT1	-0.2535	0.1748	1.4473
Q9BYN8	MRPS26	-0.0759	0.0916	0.1598
P35573	AGL	-0.3327	0.6857	1.0149
Q9NZ08	ERAP1	-1.0226	1.6389	6.5412
Q9H4L4	SENP3	-0.182	0.4082	1.0966
H0YEF7	PICALM	0.0288	1.4146	0.9108
Q9H7B2	RPF2	0.1253	1.2399	0.1011
Q7L7X3	TAOK1	-0.1157	0.8578	0.1886
P50613	CDK7	0.3514	0.4685	1.3114
Q99685	MGLL	-2.6379	4.4493	1.6024
O15066	KIF3B	-0.5778	0.1893	0.0431
Q86TG7	PEG10	-0.039	1.2661	1.2292
P17480	UBTF	-0.0561	0.275	0.006
Q99575	POP1	-0.2531	0.0397	1.6812
Q7Z7E8	UBE2Q1	0.0969	0.1348	0.1583
O76021	RSL1D1	-0.0985	0.1638	0.8353
P55061	TMBIM6	-0.474	0.9365	1.6393
P62312	6	-0.0471	0.215	0.3946
F5H658	DHX8	-0.051	0.0603	0.3081
Q9BV40	VAMP8	0.0106	0.2036	0.101
Q6UXN9	WDR82	-0.1146	0.0334	0.7215
Q16181	SEPT7	0.0487	0.258	0.0515
P27105	STOM	-0.2993	2.145	0.0606
Q13535	ATR	0.1863	0.4699	0.2716
Q8IVL6	LEPREL2	0.1957	0.147	0.581
P53367-2	ARFIP1	0.2681	0.8743	0.8542
Q9UPY5	SLC7A11	-0.4905	0.372	1.9068
Q5H9R7	PPP6R3	-0.3257	0.9343	2.3045
Q2TAY7	SMU1	-0.0422	0.0404	0.2917
Q5MIZ7	SMEK2	-0.7219	1.5215	2.1544
Q86X55	CARM1	-0.1278	0.5338	1.175
Q9NYB9	ABI2	0.3468	0.357	2.1867
P23229-2	ITGA6	-0.2581	0.3249	1.5038
Q9Y676	MRPS18B	-0.0073	0.7465	0.6022
Q8WXF1	PSPC1	0.0754	0.5737	0.9868
Q9NW13	RBM28	-0.0782	0.4044	0.8852
O60826	CCDC22	0.2827	0.4064	0.8469
O75940	SMNDC1	-0.0581	0.851	0.1841
Q5VU43-2	PDE4DIP	0.1075	0.1537	0.7173
P15559	NQO1	0.2767	0.7756	1.0064
Q96EK6	GNPNAT1	0.5139	1.4917	1.7308
P07919	UQCRH	0.1701	0.0899	1.1047
P61026	RAB10	0.1121	0.8568	0.009
O00291	HIP1	-2.6854	0.9192	10.3476
P49716	CEBPD	0.3945	1.9921	0.6363
O96007	MOCS2	-0.5526	0.8416	3.6894
Q9H7N4	SCAF1	-0.7484	0.6099	0.5167
Q71RG4	TMUB2	0.446	2.46	0.3854
P45974-2	USP5	-0.0439	0.0604	0.2346
Q9UNQ2	DIMT1	-0.1024	0.314	0.9971
Q15006	EMC2	0.6964	1.3726	2.5867
Q6XZF7	DNMBP	-0.0513	0.258	0.0168
O14657	TOR1B	0.3166	1.8106	0.2448
Q9UJF2	RASAL2	-0.1175	0.0281	0.3605
F8W031	CNPY2	-0.0491	0.4076	0.0977
O43772	SLC25A20	-0.158	0.1488	0.2961
Q9H814	PHAX	-0.3067	0.337	0.8092
Q9UBP9	GULP1	-0.3372	0.1443	1.1689
P84098	RPL19	0.2099	0.8962	0.5073
P09012	SNRPA	-0.0496	0.5351	0.093
Q9NW81	ATP5SL;DDHD2	-0.0089	0.2382	0.0005
P08237	PFKM	-0.1014	0.4844	0.2902
O43181	NDUFS4	0.0348	0.2506	0.1333
P08581	MET	-1.2547	0.1047	6.4928
P41236	PPP1R2;PPP1R2P3	0.1858	0.1897	1.3121
P35908	KRT2	0.4061	0.3714	0.8
K7EPK8	CCDC151	-0.5591	2.384	0.1164
Q9H6Y2	WDR55	-0.1297	0.2169	0.4944
Q9HC07	TMEM165	0.5777	1.0274	3.3365
Q13011	ECH1	-0.0044	0.4229	0.3076
Q05682-5	CALD1	-0.5743	0.8217	4.2987
Q96A49	SYAP1	0.2175	0.7911	0.9645
Q8IXB1	DNAJC10	-0.002	0.0682	0.1107
Q9NP92	MRPS30	0.3579	0.6713	0.68
Q96MX6	WDR92	-0.3038	0.3388	1.1728
Q13148	TARDBP	-0.1225	0.4078	0.3452
Q15118	PDK1	-0.2324	0.3432	0.6607
O94915	FRYL	0.1946	0.4564	0.5389
Q9P0L0	VAPA	0.1207	0.1304	0.8818
Q07065	CKAP4	0.3805	0.6272	2.9993
Q13428	TCOF1	-0.1245	0.0848	0.9221
Q8WXW3	PIBF1	-0.0718	0.3171	0.1063
Q93045	STMN2	-0.0832	0.4155	0.0512
Q8TCG1	KIAA1524	0.5232	2.2149	1.3017
P52756	RBM5	-0.2721	0.4546	0.9169
Q9UGN5	PARP2	0.0873	0.097	0.608
P07205	2	-0.5021	2.3814	0.2211
Q6PCE3	PGM2L1	-0.2676	0.465	0.9625
P55039	DRG2	-0.0649	0.4243	0.004
P08572	COL4A2	-2.0962	10.2906	2.0931
Q13643	FHL3	-0.3522	1.3045	0.7389
P07199	CENPB	0.3317	1.3665	0.0742
Q99962	SH3GL2	0.1858	0.3226	0.5345
O95396	MOCS3	-0.618	2.98	1.3806
Q9H0H0	INTS2	2.4408	2.1498	0.5243
P14635	CCNB1	-0.0137	0.3963	0.2519
Q8NAX6		0.7589	2.3241	3.7368
Q2M389	KIAA1033	0.0355	0.8841	0.3994
P50579	METAP2	0.0932	0.5191	0.0083
O60921	HUS1	0.154	0.1427	0.2772
Q9UKT5	FBXO4	-0.4006	0.3038	0.3606
P49459	UBE2A	0.0519	0.4182	0.1238
Q8N5F7	NKAP	0.1468	1.2852	2.2182
Q9GZT9	EGLN1	-0.3746	0.218	2.2734
Q2TAA2	IAH1	0.042	0.5244	0.2161
Q9H1Z4	WDR13	0.0714	0.173	0.3975
O60566	BUB1B	-0.1042	0.2221	0.2959
Q9NV70	EXOC1	0.2652	0.4938	1.0691
Q86U70	LDB1	0.3944	0.9968	0.8147
Q8WUM4	PDCD6IP	0.1745	1.2056	0.6028
Q9Y6D6	ARFGEF1	-0.0235	0.0808	0.2181
P16070	CD44	0.1502	0.2115	0.8834
Q9GZZ1	NAA50	-0.0297	1.3082	1.0958
Q14320	FAM50A	0.2339	0.3109	1.1996
P23381	WARS	-0.043	0.0956	0.2559
Q9ULP9	TBC1D24	0.1621	0.2191	1.2449
Q3LXA3	DAK	-0.3574	0.845	1.6309
O95232	LUC7L3	-0.004	0.5808	0.5501
Q9NYF8	BCLAF1	0.0733	1.6809	0.658
Q9H1K1	ISCU	1.118	3.6663	3.4296
O00459	PIK3R2	-0.083	0.7336	0.8716
Q01813	PFKP	0.0332	0.1461	0.0942
Q15417	CNN3	-0.6227	2.0082	2.8442
Q6NUQ4	TMEM214	0.3971	1.2533	2.6617
Q9UQ88	CDK11A	0.3307	0.6555	0.2433
Q9H2G2	SLK	-0.0817	0.5304	1.206
P63218	GNG5	0.0723	0.2834	0.5921
Q7Z392	TRAPPC11	-0.088	0.3026	0.3762
O00418	EEF2K	-0.9891	2.0532	3.8641
P13639	EEF2	0.0943	0.4571	0.286
Q9BYX2	TBC1D2	0.2321	0.0971	1.0488
P08590	MYL3;MYL1	0.0532	0.4835	0.1716
O75818	RPP40	0.0539	0.1154	0.4684
Q92544	TM9SF4	0.6372	1.3467	1.67
O00483	NDUFA4	-0.2777	0.6445	0.8524
Q969Z3	MARC2	-0.2149	0.2506	0.0174
Q86XZ4	SPATS2	0.1283	0.7434	0.0289
Q9NYY8	FASTKD2	-0.1787	1.1119	0.0967
Q9P2R3	ANKFY1	0.033	0.2683	0.4612
Q6DD87	ZNF787	0.8535	0.8475	0.5499
P46109	CRKL	-0.3839	2.8237	0.6533
Q96EY4	TMA16	0.0839	0.0085	0.501
Q01433	AMPD2	-0.295	0.7466	0.9388
Q6P1K2	PMF1	0.1742	0.0407	0.817
Q9BRT6	LLPH	-0.4161	0.8316	1.0017
Q96QC0	PPP1R10	-0.0558	0.0204	0.2538
Q14008	CKAP5	-0.0348	0.0355	0.1875
A6ZKI3	FAM127A;FAM127C	0.065	0.659	0.2059
Q8NBZ7	UXS1	0.4085	0.2807	1.4408
Q99986	VRK1	-0.2172	0.5784	0.2198
Q05048	CSTF1	-0.0113	0.3365	0.3381
Q16718	NDUFA5	-0.0586	0.8297	0.2967
Q8IXQ4	GPALPP1	-0.0108	0.5651	0.6276
Q9H4A6	GOLPH3	-0.0607	0.0536	0.4556
Q96EE3-1	SEH1L	0.3115	1.9238	0.8954
P61244	MAX	-0.3566	1.3837	0.2516
O75306	NDUFS2	0.0261	0.0984	0.0409
Q9NZJ9	NUDT4;NUDT11;NUDT10	0.2161	0.6851	0.4389
Q92805	GOLGA1	-0.0076	0.7649	0.5825
P09884	POLA1	-0.3281	0.0349	1.9508
Q9H0R4	HDHD2	-0.1662	0.0929	0.5524
Q4V328	GRIPAP1	0.0322	0.0053	0.3861
P23528	CFL1	-0.1875	0.49	0.6507
Q92685	ALG3	0.081	0.2104	0.6863
Q9BXJ9	NAA15	-0.0764	1.5733	0.5865
P41250	GARS	0.2272	1.9226	0.2595
Q9BRK5	SDF4	-0.0755	1.8749	1.0215
O75569	PRKRA	0.4945	0.1579	2.0294
Q99996	AKAP9	0.4367	0.9807	1.6012
Q9HD67	MYO10	-0.0486	0.0738	0.2231
O15013	ARHGEF10	-0.1143	0.3592	0.1684
O95070	YIF1A	0.0796	0.0949	0.2901
P22087	FBL	-0.1106	0.5338	0.1171
Q9UHY1	NRBP1	0.2183	0.6455	0.5928
P22033	MUT	0.0369	0.3371	0.5784
Q96DB5	RMDN1	0.1489	0.0846	0.6482
P15924	DSP	-0.1855	0.5209	0.8693
Q8NC56	LEMD2	0.0406	0.7295	0.6665
Q9BVK2	ALG8	0.3539	0.0139	2.4058
P51659	HSD17B4	0.0992	0.676	1.3624
O14818	PSMA7	-0.1577	0.465	0.6656
Q9UNZ5	C19orf53	0.6134	1.2952	1.8717
H0YCK3	ADAR	-0.007	0.2383	0.3221
P50336	PPOX	-0.1241	0.0427	0.2524
P63173	RPL38	0.0943	0.8275	0.1376
Q8IWE2	FAM114A1	0.3886	0.7106	1.547
Q5CZC0	FSIP2	-0.2313	0.9935	0.2638
Q15392	DHCR24	0.308	0.6052	1.3183
Q14444	CAPRIN1	-0.0306	0.1347	0.0359
Q93062-3	RBPMS	0.1827	0.2069	0.4186
P26358	DNMT1	0.0058	0.4434	0.1985
P36873	PPP1CC	0.1118	0.4346	0.1545
Q9HC36	RNMTL1	-0.055	0.8033	0.206
Q9NS69	TOMM22	0.0037	0.2025	0.2159
P54289	CACNA2D1	-0.3866	0.7792	0.4541
P54727	RAD23B	-0.2257	0.1383	1.3267
Q9H6E5	TUT1	0.2011	4.6894	2.0306
Q15418	RPS6KA1	-0.0121	0.5077	0.4007
Q9UBK8	MTRR	-0.1467	0.2578	0.6763
Q16790	CA9	-0.6333	1.6255	1.7064
Q03518	TAP1	0.1709	0.3764	1.5199
Q15746-4	MYLK	-0.1502	0.0289	0.4297
Q9H9B1	EHMT1	0.002	0.108	0.2668
Q99567	NUP88	-0.157	0.0689	1.0051
P62266	RPS23	-0.2256	0.3536	0.8721
O15438	ABCC3	-0.5448	1.9698	2.02
Q96AG4	LRRC59	0.3911	1.4275	2.5654
P04080	CSTB	-0.0558	0.1082	0.1993
P84103	SRSF3	0.032	0.2267	0.4531
P19367	HK1	0.0082	0.1357	0.1879
P62491	RAB11A	0.2421	0.4895	0.511
Q8ND04	SMG8	0.8577	1.0065	2.4519
Q9GZT8	NIF3L1	-0.2609	1.0111	0.796
Q9Y2X9	ZNF281	-0.2102	0.7558	0.163
Q6P1K8	GTF2H2C;GTF2H2	-0.1779	0.1483	1.1971
Q13409-3	DYNC1I2	0.1396	0.0361	1.2624
P21964	COMT	-0.4491	1.2748	2.6722
P00492	HPRT1	-1.0569	8.631	1.7724
Q92619	HMHA1	-0.2016	1.4974	3.9707
P49247	RPIA	0.1271	0.0187	0.5807
P49427	CDC34	0.0839	0.4964	0.8998
O76071	CIAO1	-0.0312	0.1811	0.2808
Q9H4Z3	PCIF1	-0.1498	0.2347	0.299
P16401	HIST1H1B	-0.175	1.1975	0.368
Q6IN84	MRM1	-0.3861	0.8501	1.218
Q9Y3S2	ZNF330	-0.1548	0.5215	0.0829
Q9UL25	RAB21	0.4334	1.9032	1.8154
P04083	ANXA1	0.0613	1.429	0.6375
O14646	CHD1	0.2467	1.0594	0.3811
Q9NZ01	TECR	0.047	0.512	0.7198
P61201	COPS2	-0.0031	0.404	0.3308
P04350	TUBB4A	-0.0454	0.2856	0.0771
Q9GZT3	SLIRP	0.3004	1.4373	1.0457
O76003	GLRX3	-0.04	0.0824	0.3381
P36405	3	-0.0018	1.058	0.8788
Q92828	CORO2A	0.3088	0.7161	1.9614
Q8NDV3-2	SMC1B	0.0367	0.2116	0.2412
O43660	PLRG1	-0.2191	0.2353	0.7875
O43402	EMC8	0.0729	0.856	0.1439
Q9GZP9	DERL2	0.6188	1.294	2.1334
Q8NBN7	RDH13	-0.4582	0.6734	2.045
Q96BQ5	CCDC127	0.2295	0.0117	0.9324
Q92530	PSMF1	-0.504	0.7713	1.17
P08729	KRT7	-0.3321	1.6807	0.3618
O75955	FLOT1	0.2371	0.8217	1.1511
P68366	TUBA4A	-0.1091	0.3765	0.2304
P60174	TPI1	-0.0054	0.543	0.486
P00403	MT-CO2	-0.307	0.3826	1.1292
O15042	U2SURP	-0.2586	0.8273	1.1651
Q99547	MPHOSPH6	-0.7783	1.1572	3.6245
Q8NCF5	NFATC2IP	0.276	0.9812	0.7453
A5YKK6	CNOT1	-0.0386	0.0248	0.245
P05423	POLR3D	-0.246	1.5933	0.0339
Q9NPQ8	RIC8A	-0.1499	0.9534	0.133
Q14257	RCN2	0.0453	0.3334	0.0193
P28070	PSMB4	-0.0828	0.0535	0.2927
P48634-2	PRRC2A	0.223	0.6904	0.3106
O00311	CDC7	0.2275	0.9427	0.0133
Q92538	GBF1	0.1267	0.2139	0.7301
Q92890	UFD1L	-0.046	0.5768	0.1668
Q5GLZ8	HERC4	-0.0126	0.0008	0.0002
Q9NRY5	FAM114A2	-0.3784	0.6921	0.7188
Q9UDY4	DNAJB4	0.2176	0.2611	1.1484
Q9UBW8	COPS7A	0.9483	2.753	3.3382
Q16629	SRSF7	0.0738	0.1099	0.2469
Q16594	TAF9;TAF9B;AK6	0.0475	0.3122	0.549
G5EA36	CDC27	0.2097	1.7367	0.148
P10589	NR2F1;NR2F2	-0.0393	0.3162	0.3954
P49356	FNTB;CHURC1-FNTB	0.0079	0.4029	0.1971
Q9BRT2	UQCC2	-0.2947	0.3688	0.7914
P46379	BAG6	0.0296	0.1625	0.2272
P30533	LRPAP1	0.3834	0.0966	3.005
Q04721	NOTCH2	-0.0011	0.1086	0.0199
Q13642-1	FHL1	-0.2126	0.5395	0.8379
Q9H0A0	NAT10	-0.0611	0.6535	1.0311
P08559	PDHA1	0.2716	1.0452	1.3019
Q9NP77	SSU72	0.2843	1.2859	0.1731
O75844	ZMPSTE24	0.3582	1.1941	1.1252
Q99643	SDHC	0.8882	5.2821	0.6665
P54278	PMS2	-0.1774	0.8556	1.8069
P07942	LAMB1	-0.2038	0.4033	0.7651
O15031	PLXNB2	0.1938	0.4536	0.4421
P12268	IMPDH2	0.1091	0.8753	0.0974
Q92598	HSPH1	0.024	0.5546	0.6931
P56211	ARPP19	-0.3425	0.5395	1.1428
O75683	SURF6	-0.2518	0.5479	1.4346
Q8N766	EMC1	0.3178	0.3613	1.8597
Q99543	DNAJC2	-0.102	0.1089	0.4694
Q9NSP4	CENPM	-0.0251	0.2397	0.1756
Q9NWV4	C1orf123	-0.1236	0.138	0.4001
Q9BUJ2-4	HNRNPUL1	-0.1308	2.8733	0.9856
Q9Y223	GNE	-0.0246	0.5971	0.4735
P05026	ATP1B1	-0.1275	0.5309	1.378
P60604	UBE2G2	-1.9644	9.5486	6.3826
Q14137	1	0.0546	0.1585	0.0825
Q9Y3U8	RPL36	0.1267	0.2772	0.3149
Q15024	EXOSC7	0.2488	0.7438	0.4354
Q13057	COASY	0.0844	1.0261	0.178
Q7L1W4	LRRC8D	0.2347	1.0754	0.0945
Q8N1G2	CMTR1	-0.3323	0.0629	1.1098
O75688	PPM1B	-0.5827	1.0457	0.9516
P28347	TEAD1;TEAD4;TEAD3;TEAD2	0.1471	0.1367	0.5914
P51570	GALK1	0.1831	0.3211	0.7744
Q9ULX3	NOB1	0.0872	0.6567	0.0364
P42167	TMPO	-0.1878	1.0185	0.2483
P61758	VBP1	-0.2071	0.4869	0.7862
Q99766	ATP5S	0.0966	0.2309	0.0119
P68104	EEF1A1	0.1215	0.6758	0.346
O95613	PCNT	0.0117	0.1125	0.0323
Q13405	MRPL49	-0.0985	1.5818	0.7595
Q9Y217	MTMR6	-0.4269	0.404	1.908
P29372	MPG	0.8047	1.1437	1.9363
P61163	ACTR1A	-0.1076	0.0216	0.4501
O75911	DHRS3	0.336	0.5994	1.2295
Q96DA6	DNAJC19	-0.2824	0.9378	0.2175
Q8N556	AFAP1	0.2187	0.0769	1.3971
Q96C36	PYCR2	0.1336	0.5895	0.3702
H3BN98		0.059	0.444	0.8424
Q4G0J3	LARP7	-0.1468	0.5558	0.7357
P16949	STMN1	0.0835	0.5908	1.3483
Q8NBJ7	SUMF2	0.0493	0.0376	0.1335
Q9UNE7	STUB1	0.0772	0.5819	1.1185
Q8WUI4	HDAC7	-0.1886	0.5088	0.0619
Q8TAD8	SNIP1	-0.0105	0.2841	0.2055
O43488	AKR7A2	0.021	0.0954	0.0379
P21281	ATP6V1B2	0.4469	2.0096	2.3221
O75380	NDUFS6	-0.0178	0.2341	0.0109
P04792	HSPB1	0.2142	0.4568	2.1982
Q6GMV2	SMYD5	-0.2224	2.1462	2.8949
O75165	DNAJC13	0.1334	0.1349	0.9802
Q9NR28	DIABLO	0.2903	0.1366	1.7085
P55036	PSMD4	-0.2242	0.5713	0.8274
A2RRP1	NBAS	0.2941	0.4243	1.0718
O94788	ALDH1A2	0.087	0.638	0.7235
P49642	PRIM1	-0.2194	0.5387	1.7331
P63172	DYNLT1	0.1164	0.5882	1.3163
Q8NFF5	FLAD1	0.1714	0.4662	0.3672
Q15773	2	0.4314	0.0667	2.7823
Q8IZU2	WDR17	0.5653	0.0172	0.8484
Q99832	CCT7	0.0133	0.1142	0.0281
P63092	GNAS	-0.1087	0.0244	0.3323
Q06210	GFPT1	0.6229	2.3245	2.8977
Q5VTL8	PRPF38B	-0.091	0.4293	0.0316
Q15459	SF3A1	-0.1959	0.8941	0.6504
P36507	MAP2K2	0.1193	0.2695	0.6283
P35268	RPL22	-0.0895	0.0545	0.4652
Q99633	PRPF18;LOC101928524	-0.4433	0.4131	1.3356
P61586	RHOA	-0.0653	0.1583	0.1267
Q9P1F3	ABRACL	-0.1118	0.2411	0.4499
P13995	MTHFD2	0.1729	0.6542	0.2644
Q92688	ANP32B	-0.0384	0.2566	0.1001
O15067	PFAS	-0.3937	0.5225	3.8478
P52739	ZNF131	-0.3918	0.3122	0.266
O75531	BANF1	0.1885	0.8647	0.2904
Q10567-3	AP1B1	-0.119	0.9886	0.0736
C9JQV6	ATXN3	-0.2399	1.6385	0.2714
P14618	PKM	-0.1211	0.3126	0.6342
Q9UBM7	DHCR7	0.2113	0.074	1.5162
Q7L2H7	EIF3M	0.0588	0.1293	0.237
Q9NX24	NHP2	-0.5322	1.1047	2.2178
O43633	CHMP2A	0.0542	0.045	0.2609
Q99470	SDF2	0.4924	0.9053	1.9198
Q9HD34	LYRM4	-0.7712	2.17	1.8869
Q14697-2	GANAB	-2.2425	2.5832	10.017
Q96EY7	PTCD3	-0.0053	0.5094	0.4019
P35613	BSG	0.5976	1.4491	1.8487
Q6NYC1	JMJD6	0.5912	1.2023	1.7287
Q8IXI1	RHOT2	0.3465	0.9455	1.1131
P09661	SNRPA1	0.012	0.117	0.2114
Q8NFW8	CMAS	0.6731	1.0705	3.2742
Q96I15	SCLY	-0.4922	0.9735	2.9004
O43847	NRD1	0.0393	0.352	0.0497
P42574	CASP3	-0.1259	0.0499	0.0555
Q9H0U4	RAB1B;RAB1C	0.3474	2.0452	1.2227
Q9NWU2	GID8	-0.3635	0.8376	0.7656
P68363	TUBA1B;KLK9	0.0522	0.5803	0.0913
Q9NVA2	SEPT11	-0.0906	0.1852	0.4201
Q15648	MED1	-0.1782	1.5303	0.0507
Q96EY8	MMAB	0.0306	0.6492	0.6547
A4D1E9	GTPBP10	-0.259	0.5104	1.5317
P51003	PAPOLA	-0.4082	0.3916	1.1001
Q8TDX7	NEK7	0.8487	4.5091	1.8297
Q02338	BDH1	-0.4845	1.0136	0.7863
P67775	PPP2CA	-0.1314	0.3153	0.4633
Q14592	ZNF460	2.0545	1.7491	5.9564
Q9HCD6	TANC2	-0.2475	0.3319	0.3721
Q8IX12	CCAR1	-0.1124	0.2497	0.3926
P51532-5	SMARCA4	0.0408	0.2592	0.0226
Q8WUF8	FAM172A	-0.2241	1.0201	0.007
Q9NUQ2	AGPAT5	0.4836	2.5811	1.5618
Q9Y6N7	ROBO1	0.1642	0.4722	0.4323
Q8WYP5	AHCTF1	-0.0111	0.6583	0.5131
Q9NV88	INTS9	0.0779	1.3503	0.557
E9PKQ5	CCDC90B	0.037	0.0163	0.188
Q9UL15	BAG5	0.284	0.4362	0.789
P53675	CLTCL1	-0.2641	0.831	0.1523
O95104	SCAF4	0.0819	1.2311	1.5931
P24844	MYL9	0.1517	0.2145	0.5593
Q6UXH1	CRELD2	0.2276	0.075	1.3087
Q96QU8	XPO6	0.0349	0.1211	0.1794
Q5RI15	COX20	0.2036	0.1123	1.9215
P51159	RAB27A	0.9385	0.4492	4.2917
Q9NRX1	PNO1	0.0475	2.2506	1.3596
Q15796	SMAD2;SMAD3;SMAD9	-0.1242	0.0199	0.5156
P36542	ATP5C1	0.2156	0.011	1.0917
P61981	YWHAG	0.17	0.7747	0.5054
Q9P2B4	CTTNBP2NL	0.0068	0.3178	0.004
Q15819	UBE2V2	-0.0108	0.0638	0.0839
Q9BZK7	TBL1XR1	0.0408	0.7793	0.9602
Q13443	ADAM9	-0.0581	0.02	0.4651
Q15287	RNPS1	0.0981	0.6741	0.0085
Q70UQ0	IKBIP	0.2716	0.0554	2.1219
Q15527	SURF2	-0.1711	0.0022	0.5918
P62942	FKBP1A;FKBP12-Exip2	-0.3181	0.634	1.5316
P07093-2	SERPINE2	0.2031	0.492	0.7917
H7BXI1	ESYT2	0.0242	0.2526	0.0785
Q8N392	ARHGAP18	-0.6981	2.6867	4.4263
Q9Y5B9	SUPT16H	-0.0456	0.1584	0.1673
Q9UNK0	STX8	-0.1592	0.6526	0.0334
Q9NSG2	C1orf112	0.1651	0.2171	0.5898
P09417	QDPR	-0.3337	1.0758	1.1783
Q9C0I1	MTMR12	0.5375	1.6111	0.9302
Q969H8	C19orf10	0.3379	0.1504	1.3675
Q8N1F7	NUP93	0.1614	0.8591	0.2652
Q5R3I4	TTC38	0.239	0.2563	0.4814
Q9NRV9	HEBP1	0.0395	0.1184	0.2884
Q9UBK9	UXT	0.5071	1.1464	1.8187
Q9Y3Z3	SAMHD1	0.0184	0.3235	0.1135
Q9NWX6	THG1L	-0.3999	0.6764	2.5512
Q9Y608	LRRFIP2	-0.9888	2.5457	0.4015
Q9P289	MST4;RBM4B	0.0512	0.2117	0.1269
O75674	TOM1L1	0.5181	0.7184	1.4548
Q9NZB2	FAM120A	-0.0885	0.0887	0.4088
Q9NQT5	EXOSC3	-0.0378	0.2286	0.4083
Q9NTJ3	SMC4	0.0115	0.1453	0.0409
Q9NRY4	ARHGAP35	-0.0863	0.0097	0.3716
Q75QN2	INTS8	0.0323	0.6125	0.2949
P50583	NUDT2	0.2926	0.8448	0.7058
P07384	CAPN1	0.0893	0.5585	0.0296
Q99519	NEU1	0.0179	1.1186	1.05
Q13823	GNL2	0.0442	0.0684	0.1371
O95166	GABARAP;GABARAPL1	-0.1012	0.1066	0.5966
Q9BXS6	NUSAP1	0.0122	0.0582	0.0536
P78549	NTHL1	-0.2546	0.6809	0.8464
Q13952	NFYC	0.1276	0.311	0.2959
Q9Y3T9	NOC2L	0.0372	0.1716	0.0468
P19388	POLR2E	-0.0837	0.0727	0.3844
O60245	PCDH7	0.5625	1.4702	2.3502
Q9H1I8	ASCC2	-0.0045	1.4613	1.2338
Q14573	ITPR3	0.2066	0.6457	0.9639
Q99442	SEC62	0.5396	1.1992	1.9737
Q9NP66	HMG20A	-0.111	0.3198	0.7142
Q9UBG0	MRC2	0.1833	0.0032	0.9701
Q16555	DPYSL2	-0.1792	0.7518	0.472
Q86Z02	HIPK1	0.331	1.184	0.3407
Q9BQE3	TUBA1C	-0.1574	0.0258	0.8214
P37235	HPCAL1;HPCA	0.0673	0.0603	0.3445
Q13310	PABPC4	-0.0756	1.2686	1.6401
Q96NB3	ZNF830	0.2322	0.3574	0.3055
Q9H0V9	LMAN2L	0.7079	2.3895	2.3812
P68431	HIST1H3A	-0.2721	0.0733	1.293
P07477	PRSS1;PRSS2;PRSS3P2	-0.1821	0.3175	0.0147
Q9Y657	SPIN1	0.5284	1.5158	0.8138
Q92882	OSTF1	-0.1263	0.4059	0.0374
P20340	RAB6A;RAB6B	0.0013	0.6006	0.4353
Q9H9Y2	RPF1	-0.0411	0.3841	0.5515
P50552	VASP	-0.4194	4.1544	0.1243
O75586	MED6	-0.1661	0.2652	0.3038
P49902	NT5C2	-0.0244	0.5197	0.6684
Q02878	RPL6	0.1087	0.332	0.3438
Q69YH5	CDCA2	0.4546	0.9894	3.3988
Q15057	ACAP2	-0.6261	2.9414	0.0192
P30419	NMT1	-0.0965	0.0489	0.6087
P49959	MRE11A	-0.2057	0.7488	0.9888
Q96B97	SH3KBP1	0.1275	0.7255	0.0337
O43314	PPIP5K2	-0.1164	0.3516	0.236
P07355	ANXA2;ANXA2P2	-0.1582	0.2854	1.1789
Q7L5Y1	ENOSF1	0.006	0.1441	0.0007
Q9UFW8	CGGBP1	-0.4335	2.9465	0.3573
Q9UHX3	EMR2	0.2651	0.6145	0.4496
Q9BQ24	ZFYVE21	0.1643	0.1265	0.2872
P18124	RPL7	0.0945	0.2776	0.3644
P49773	HINT1	0.2162	0.1315	1.0826
Q96D71	REPS1	-0.7611	0.0742	3.4678
Q9H0X4	ITFG3	0.2751	0.0059	1.4502
Q9HCD5	NCOA5	0.0576	0.1174	0.2114
Q15907	RAB11B;RAB11A	0.1693	0.5047	0.4114
Q7Z4G1	COMMD6	-0.1295	0.4058	1.1707
Q13144	EIF2B5	-0.149	1.0394	0.1982
A4UGR9	XIRP2	0.3355	0.517	0.0669
O43913	ORC5	0.0249	0.1067	0.0277
Q9BTY7	HGH1	-0.049	0.2737	0.4617
Q96IV0-2	NGLY1	0.4666	0.2779	2.1967
Q9BY44	EIF2A	0.1865	0.6303	0.8799
P60602	ROMO1	0.4219	1.0736	1.8311
Q6RFH5	WDR74	0.1321	0.6343	0.0171
Q6P1R4	DUS1L	0.0295	0.3668	0.3099
Q9P0U3	SENP1	0.3132	0.1426	1.3412
Q8NB37	PDDC1	-0.0357	1.1517	1.2078
Q9NVH1	DNAJC11	0.1799	0.0726	1.3591
P48681	NES	-0.5203	1.9729	1.2854
Q8IWS0	PHF6	-0.1598	0.0878	1.1629
Q5VZF2	MBNL2;MBLL	-0.2147	0.0233	1.1564
P30038	ALDH4A1	-0.6103	0.9754	2.2967
Q15390	MTFR1	-0.2561	0.2366	0.4971
Q6VY07	PACS1	0.4202	1.6325	0.7574
Q7Z3J2	C16orf62	-0.4299	0.9132	2.1789
P07910-2	HNRNPC	-0.046	0.2124	0.1192
P23284	PPIB	-0.0218	0.7803	0.4028
O43395	PRPF3	0.0182	0.2962	0.423
Q96JJ7	TMX3	0.0472	1.5016	2.1475
P42696	RBM34	-0.1212	0.1014	0.4746
Q16644	MAPKAPK3	0.1854	0.0667	0.5387
P35520	CBS	-0.2841	1.0063	0.9075
Q86UY8	NT5DC3	-0.5076	1.5937	1.059
P50453	SERPINB9	0.5744	0.8124	1.5155
Q02790	FKBP4	0.0736	0.3855	0.1505
P43353	ALDH3B1	0.1792	1.674	0.2703
Q9P0M9	MRPL27	0.3384	0.2675	1.1796
P83916	CBX1	-0.7466	0.8691	0.1954
Q9NSI2	FAM207A	-0.0009	0.1048	0.2191
Q9UJ41	RABGEF1	-0.1679	0.3204	0.4326
O60669	SLC16A7	-0.3177	4.0724	1.3972
Q6EEV4-2	POLR2M	-1.1911	0.1069	6.2064
O14744	PRMT5	-0.2245	0.6332	0.8275
Q9UBC2	EPS15L1;SPATA22	0.157	0.6662	0.315
Q96RL1	UIMC1	-0.3815	0.9932	0.7675
Q9BY49	PECR	0.4914	1.0204	2.8514
P61619	SEC61A1;SEC61A2	0.5726	1.1925	2.2158
Q14980-2	NUMA1	0.0609	0.1531	0.2322
O15371	EIF3D	-0.0444	0.4638	0.2112
Q8WVV9	HNRNPLL;HNRPLL	0.2331	0.8406	0.6216
Q13371	PDCL	0.3417	0.3189	1.9599
Q6UN15	FIP1L1	0.3288	0.3007	1.2475
Q8IU85	CAMK1D	-0.2649	1.4309	0.5129
Q9Y314	NOSIP	0.2143	0.2376	1.0565
O75381	PEX14	-0.0475	0.4273	0.2724
Q9UGM6	WARS2	-0.2285	0.1166	0.1344
O15269	SPTLC1	0.0825	1.206	0.5729
Q9UNY4	TTF2	-0.2436	0.0794	0.0963
Q9NZM5	GLTSCR2	-0.4504	0.7362	0.4946
P57088	TMEM33	0.2115	0.5497	0.1756
O60427	FADS1	-0.5746	1.5096	2.337
P11172	UMPS	0.0339	0.4276	0.103
Q00325-2	SLC25A3	0.2612	0.6026	1.1812
Q6NXE6	ARMC6	0.0288	1.1827	0.7594
P23588	EIF4B	-0.2956	1.6537	0.7991
Q16204	CCDC6	0.1427	0.2796	0.3772
Q9Y605	MRFAP1	-0.1217	0.5411	0.8195
Q96CT7	CCDC124	-0.1316	0.7362	0.1879
Q9Y371	SH3GLB1	0.1178	0.3445	0.7803
Q9H496	TOR1AIP2	-0.4787	0.3014	2.4759
Q14BN4	SLMAP	-0.1499	0.8858	0.0434
O15213	WDR46	0.0326	0.1549	0.1779
P08962	CD63	0.6733	1.8139	2.0407
Q9BTE6	AARSD1;PTGES3L-AARSD1	-0.0027	0.0646	0.1712
Q3KQV9	UAP1L1	-0.3744	1.4121	0.719
Q9Y2S0	POLR1D	-0.2765	0.8891	0.757
Q86TP1	PRUNE	-0.2717	2.0167	0.1133
Q9P2K8	EIF2AK4	-0.069	0.1936	0.5262
P27694	RPA1	0.0907	0.4218	0.2766
P40855	PEX19	-0.2418	0.2535	1.2513
Q9BWW4	SSBP3;SSBP2;SSBP4	-0.0519	0.1924	0.4325
Q7Z417	NUFIP2	0.1518	0.8255	0.474
P48507	GCLM	0.1016	0.236	0.8964
P10619	CTSA	0.3178	0.9766	0.5711
P56545	CTBP2	-0.2166	0.5053	0.7644
P07951-2	TPM2	-0.2445	1.9923	0.3013
H7BZJ3	PDIA3	0.015	0.0075	0.0785
Q8TAA9	VANGL1	-0.3485	0.4009	1.296
Q9HBI1	PARVB	-0.2777	1.0736	0.3363
Q9HD15	SRA1	0.0662	0.2053	0.4324
Q9ULC3	RAB23	0.8448	1.4767	2.6147
Q8TDZ2	MICAL1	-0.1014	0.4617	0.1128
Q8NC51-3	SERBP1	-0.1076	0.4113	0.314
Q14181	POLA2	-0.361	0.0729	2.7216
Q9UPW5	AGTPBP1	-0.0736	0.0341	0.4166
Q9Y6K5	OAS3	1.0312	1.1389	2.8589
Q13423	NNT	-0.1448	0.7909	0.6461
P19447	ERCC3	-0.0739	0.4212	0.6123
Q92879	CELF1	-0.1434	0.1461	0.7322
P83876	TXNL4A	0.059	0.0066	0.227
Q8WTT2	NOC3L	-0.0715	0.3581	0.8691
Q8NFZ0	FBXO18	-0.2077	0.9218	0.303
P49821	NDUFV1	-0.1121	0.2484	0.193
Q7Z7H5	TMED4	0.4573	1.788	0.437
Q9NRG0	CHRAC1	-0.1181	0.5599	0.3157
Q13322	GRB10	-0.1676	0.2934	0.2188
Q8N4C6	NIN	0.4479	0.8777	1.4957
O75828	CBR3	-0.0458	0.041	0.1141
O43676	NDUFB3	-0.002	0.5864	0.1329
Q96SB4	SRPK1	-0.3901	3.9584	0.2028
Q9NYR9	NKIRAS2	0.3465	2.7152	0.6268
Q5SSJ5	HP1BP3	0.1023	1.3029	0.2061
Q9NY27	PPP4R2	-0.0554	0.2435	0.4463
P67812	SEC11A	-0.2013	1.0729	0.0591
Q01804	OTUD4	0.1854	0.5633	0.3503
Q13416	ORC2	0.008	0.37	0.2463
Q9ULT8	HECTD1	0.0765	0.4817	0.0222
P47985	UQCRFS1;UQCRFS1P1	0.0118	0.4185	0.5352
Q14978-2	NOLC1	-0.1032	0.9414	0.0067
Q9NZL9-2	MAT2B	-0.5799	3.4476	0.3297
O75821	EIF3G	-0.1181	0.4026	0.3875
Q15061	WDR43	-0.1676	0.0871	0.6649
Q969X6	CIRH1A	-0.2184	0.1713	0.8744
P61247	RPS3A	0.0668	0.4174	0.0911
Q92541	RTF1	-0.1211	1.2358	0.2333
Q9NTX5	ECHDC1	-0.1076	1.6044	0.4058
O43678	NDUFA2	-0.1201	0.2435	0.2768
F5H4N4	PXMP2	-0.1174	0.4248	0.091
Q9Y5X1	SNX9	0.0514	0.3915	0.1107
P43034	PAFAH1B1	-0.0895	1.4214	0.405
Q92817	EVPL	-0.0585	0.5398	0.0679
E7EUT4	GAPDH	-2.1096	3.7849	5.9468
Q5XKP0	QIL1	-0.0791	0.0823	0.2899
Q68CZ2	TNS3	-0.3466	0.7454	1.7418
Q17RY6	LY6K	0.1201	0.1645	0.1923
P49006	MARCKSL1	-0.4896	1.5036	1.4079
Q5HYZ1		0.2846	1.2217	0.243
Q9GZS1-2	POLR1E	0.5632	1.8047	2.1763
Q96T37	RBM15	0.1279	0.3849	0.2904
Q8IVD9	NUDCD3	0.1502	0.4032	0.5283
Q96TA1	FAM129B	0.061	0.0157	0.4421
O43837	IDH3B	0.2916	0.9874	0.9032
P52701	MSH6	-0.2289	1.7326	0.2714
Q99757	TXN2	-0.2364	0.5309	2.4012
Q01970	PLCB3	-0.0742	0.4292	0.1072
Q9UNP9	PPIE	-0.0196	0.8588	0.7554
P16383	GCFC2	0.6721	1.4579	1.2517
P30040	ERP29	0.1253	0.3266	0.4116
P46100	ATRX	-0.5585	0.8397	2.217
Q16134	ETFDH	-0.0108	0.1122	0.1239
P16402	HIST1H1D	0.3703	0.6215	0.9357
Q3ZCQ8	TIMM50	-0.093	0.6235	0.0846
O94855	SEC24D	0.4128	0.1712	2.6028
Q13111	CHAF1A	-0.1643	0.491	0.2575
Q96A65	EXOC4	0.0006	0.4424	0.3374
Q9P015	MRPL15	0.051	0.0946	0.1466
P55072	VCP	-0.1421	0.0772	1.1681
F8W543	NAP1L1	-1.2512	2.8678	6.8076
P05141	SLC25A5	0.0522	0.0332	0.1532
P29218	IMPA1	-0.9163	2.6525	4.7696
Q9BRJ2	MRPL45	-0.0223	0.2982	0.1795
P54725	RAD23A	0.2792	1.064	0.7717
O14965	AURKA	0.1008	0.9473	0.2725
Q8WVY7	UBLCP1	-0.4428	1.3302	1.3952
H7C2F2	CD99	-0.0738	0.2875	0.7478
P48444	ARCN1	0.2623	0.7547	1.4176
Q13547	HDAC1	0.0701	0.2913	0.1759
Q9UJY1	HSPB8	-0.7915	0.4843	2.9744
F5H0B0		-0.2107	0.0148	0.0549
P36954	POLR2I	0.1618	0.1607	0.6405
Q6ZS30	NBEAL1	0.2164	0.5139	0.4442
Q5VIR6-4	VPS53	-0.0994	0.0515	0.8656
Q8N5M4	TTC9C	0.2436	1.0578	0.3012
Q13200	PSMD2	0.0707	0.0302	0.4015
Q96B26	EXOSC8	-0.2394	0.4249	1.2347
P54577	YARS	0.0685	0.874	0.129
P53701	HCCS	-0.0403	0.0346	0.1386
Q15723-4	ELF2	-1.1439	5.994	0.3506
Q9UQ13	SHOC2	-0.2863	1.1745	0.8479
Q9NUP1	BLOC1S4	-0.2776	1.1682	2.293
G3V3G9	DCAF8	0.9181	3.7721	2.4048
P62879	GNB2	-0.2941	1.3899	0.4286
Q9BTE1	DCTN5	-0.3727	1.1439	0.7449
O96011	PEX11B	-0.178	0.3445	0.4939
P42766	RPL35	0.1641	0.8421	0.3089
Q8NFH3	NUP43	-0.0314	0.3204	0.3837
Q9Y394	DHRS7	0.1154	0.047	0.5479
Q9BYD1	MRPL13	-0.0332	0.3574	0.0941
Q9H267	VPS33B	-0.0423	0.2392	0.0337
Q8IY21	DDX60	0.627	0.799	3.1818
O43390	HNRNPR	-0.0598	0.3896	0.0744
Q96CU9	FOXRED1	0.4366	0.6269	1.398
P43304	GPD2	-0.1131	0.2693	0.8837
O15182	CETN3	-0.6091	1.8993	0.9884
O60333	KIF1B	0.5338	1.5018	1.1178
P31943	HNRNPH1	0.0255	0.1201	0.2966
Q96Q15	SMG1	-0.1987	0.7021	0.0155
Q15365	PCBP1	-0.164	1.4815	0.1285
Q96C90	PPP1R14B	-0.1203	0.3107	0.3818
Q9UMS0	NFU1	0.1101	0.7127	0.1526
P35250	RFC2	-0.0124	0.1156	0.0397
Q9UQE7	SMC3	0.007	0.2185	0.2682
Q8NBU5	ATAD1	0.0432	0.2845	0.5923
P61923	COPZ1	0.6132	2.5819	3.535
P04818	TYMS	0.0403	0.6741	0.8065
O95625	ZBTB11	-1.9042	12.5228	2.3825
P39748	FEN1	0.1311	0.1536	1.3569
Q9UJV9	DDX41	0.2896	0.3265	1.1213
P53582	METAP1	-0.1798	1.0605	0.4406
Q9P209	CEP72	-0.1047	1.3346	0.2962
Q92621	NUP205	0.0369	0.8031	0.3703
Q15363	TMED2	-0.4244	0.0749	1.6124
O94888	UBXN7	-0.2539	1.4102	0.6022
P17275	JUNB	0.1579	0.6028	0.2074
Q8N5N7	MRPL50	-0.1153	0.5173	0.292
O75116	ROCK2	-0.1948	1.9973	0.3005
Q15059	BRD3	-0.3507	1.3785	1.1021
Q14241	TCEB3	0.4476	1.2652	0.2781
Q99574	SERPINI1	1.9729	1.7499	4.0542
P78310	CXADR	-0.2239	0.0442	1.3023
Q00688	FKBP3	0.0182	0.3169	0.391
Q13151	HNRNPA0	-0.1229	0.3193	0.5696
P13637	ATP1A3	0.2246	0.4018	1.1616
Q96CN7	ISOC1	0.2072	0.1669	0.8602
Q14997	PSME4	-0.3209	1.4975	0.5528
O60256	PRPSAP2	-0.1883	0.5749	0.8318
Q13347	EIF3I	0.0985	0.4342	0.2115
O95456	PSMG1	-0.0683	0.5317	0.0241
P28827	PTPRM;PTPRT	-0.0428	0.1445	0.2799
O75600	GCAT	-0.2437	1.223	0.2976
P16403	HIST1H1C	-0.1816	1.062	0.3488
Q01664	TFAP4	0.2388	0.247	1.8126
P50135	HNMT	-0.2104	0.1747	0.545
P47756-2	CAPZB	-0.0293	0.1912	0.0347
O15116	1	-0.2322	0.7585	0.5361
P53041	PPP5C	-0.1294	0.0231	0.5319
P18583-5	SON	-0.0199	0.073	0.0122
P48060	GLIPR1;SEMA6A	0.019	0.4423	0.5654
P49327	FASN	0.1938	0.636	1.1128
Q12907	LMAN2	0.0275	1.4442	0.9537
Q9H3Z4	DNAJC5	0.2368	0.0131	1.3273
P40763	STAT3	0.0886	0.4133	0.1368
Q8WU79	SMAP2	0.2918	1.0751	0.1269
Q9Y2Q3	GSTK1	0.1694	0.1411	1.3537
P11177	PDHB	0.1116	0.1824	0.7453
Q9BTY2	FUCA2	0.5198	1.2799	3.3552
Q8IWF6	DENND6A	0.4594	1.3001	0.4681
P62820	RAB1A	0.1603	0.3016	0.5622
Q9UPN7	PPP6R1	-0.1978	0.0834	0.4914
Q9BRT9	GINS4	-0.1357	0.2944	1.2576
P01116-2	KRAS	0.2904	0.8747	0.8915
Q99496	RNF2	-0.0653	0.3241	0.1459
P20674	COX5A	0.1132	0.1659	0.7665
Q9UPN9	TRIM33	-0.2075	0.0704	0.8287
E9PPU0		-0.029	0.0293	0.1805
Q9HCN4	GPN1	0.1112	0.8956	0.108
Q8IUE6	HIST2H2AB	-0.319	0.5049	1.5297
Q6P9B9	INTS5	0.2637	0.1442	0.8631
P00973	OAS1	0.6059	7.1331	0.2631
P46940	IQGAP1	0.0187	0.412	0.1421
P04062	GBA	0.1506	0.0318	0.4332
O43293	DAPK3	-0.2444	1.0455	0.0367
P58107	EPPK1	-0.0058	0.2585	0.1903
Q6PJG6	BRAT1	-0.0344	0.6001	0.5595
Q14247	CTTN	0.0566	0.0256	0.3397
Q69YQ0	SPECC1L;SPECC1L-ADORA2A	-1.5475	0.5157	9.016
Q96F86	EDC3	-0.1442	0.5068	0.449
P32969	RPL9	-0.1079	0.0434	0.5543
Q8IY37	DHX37	-0.0529	0.2372	0.0411
P48643	CCT5	-0.0118	0.0655	0.1373
P43307	SSR1	0.0903	0.2322	0.259
Q9UKG1	APPL1	0.0112	0.3601	0.4377
Q04726	TLE3;LITAF	-0.0852	0.4257	0.0416
Q96T76	MMS19	0.137	0.8033	0.0486
P61106	RAB14	0.207	0.6485	0.8888
O00116	AGPS	0.2707	1.1759	1.1176
Q6IAN0	DHRS7B	0.5293	1.6297	1.8358
P67809	YBX1	-0.0757	0.4303	0.1352
H3BPE1	MACF1	-0.0844	0.0627	0.2155
P41240	CSK	-0.0438	0.0025	0.1733
O94973	AP2A2	-0.1188	0.1454	0.9602
Q92551	IP6K1	0.6101	0.1196	0.5302
Q9Y3D8	AK6;TAF9	-0.0896	0.2833	0.0636
Q7Z3C6	ATG9A	-0.5624	10.64	4.1325
Q9H8H3	METTL7A	-0.0224	1.5223	0.1235
O95684	FGFR1OP	0.0649	0.1692	0.3382
O95297	MPZL1	0.5323	0.925	3.6422
Q01469	FABP5	-0.0685	0.1192	0.6345
P60228	EIF3E	0.0631	0.0033	0.4199
O60293	ZFC3H1	0.0297	0.0483	0.0213
Q9HAN9	NMNAT1	0.4022	0.1505	1.3427
Q8N201	INTS1;DKFZP586J0619	-0.4133	1.1612	0.1559
O95786	DDX58	0.1632	0.06	0.7834
O43432	EIF4G3	-0.2692	0.0197	2.1386
Q6ZNB6	NFXL1	0.072	0.1134	0.1426
P60891	PRPS1	-0.0737	0.0906	0.3694
P51610	HCFC1	-0.1716	0.954	0.4495
Q8IXT5	RBM12B	-0.2011	1.1485	0.1247
Q9Y266	NUDC	0.1009	0.3286	0.9122
P17096-2	HMGA1	-0.4255	1.9731	0.5388
O95067	CCNB2	0.5321	1.8073	1.0242
Q9NZ43	USE1	-0.074	0.8993	0.5833
P60468	SEC61B	0.5217	2.1895	1.8073
Q5T0F9	CC2D1B	-0.3834	0.4622	0.7693
Q14195-2	DPYSL3	-0.2637	0.1436	2.142
P16083	NQO2	0.3129	0.0131	2.1629
Q96M27	PRRC1	0.2035	0.1419	1.3197
O60361	NME2P1	-0.509	0.975	0.3999
Q8NCW5	APOA1BP	-0.061	0.044	0.343
Q5VW36	FOCAD	0.2769	1.5721	0.1007
Q99536	VAT1	0.0382	0.0698	0.2607
Q9NZN4	EHD2	0.0003	0.0982	0.0856
Q8TAQ2	SMARCC2	-0.2978	1.0552	0.7973
P45880	VDAC2	0.3421	0.8817	2.2488
Q13283	G3BP1	-0.1593	0.3173	1.1127
Q12996	CSTF3	-0.185	0.3443	0.8518
Q9H4M9	EHD1	0.2145	0.8814	0.7088
Q6P587-3	FAHD1	0.2035	0.7314	0.6828
Q01974	ROR2	0.7791	0.6142	5.9568
Q96LD4	TRIM47	-0.0864	0.1319	0.4404
P08134	RHOC	0.1121	0.4446	0.0681
Q9NVQ4	FAIM	-0.1797	0.638	0.0743
P19022	CDH2	-0.4728	0.7155	2.0734
P29692-3	EEF1D	0.5282	0.2417	2.6187
O75438	NDUFB1	-0.1801	0.809	0.0215
P21399	ACO1;IRP1	-0.0779	0.0196	0.4706
P49411	TUFM	0.1797	0.1481	1.3859
P78330	PSPH	0.3051	1.8791	0.88
Q9BVI4	NOC4L	0.2061	0.356	0.6866
Q5JSZ5-5	PRRC2B	0.0312	0.9203	0.4607
P20585	MSH3	-0.3859	1.5862	0.5053
P62269	RPS18	-0.0117	0.1158	0.007
Q8IXI2	RHOT1;TMEM91	0.011	0.1343	0.2071
Q9HAU5	UPF2	-0.2686	0.7492	0.9425
P07900	HSP90AA1	-0.1292	0.0136	0.9867
Q9Y678	COPG1	0.3458	1.3476	1.55
Q9P0K7	RAI14	-0.1484	0.3834	0.7497
Q9UIJ7	AK3	0.3556	0.6078	1.7355
Q16706	MAN2A1	0.4268	0.4324	1.0876
Q9BZL1	UBL5	-0.8179	1.2386	2.4238
Q12974	PTP4A2	-0.1996	0.3398	0.7129
Q9H6Z4	RANBP3;ZNF8	-0.2753	0.5009	0.9121
Q53F19	C17orf85	0.4976	1.4532	0.8626
Q96TC7	RMDN3	-0.184	0.0529	0.8207
O00159	MYO1C	0.3456	0.8465	1.6151
Q9ULW0	TPX2;HCA90	-0.1578	2.6893	0.3739
P46779	RPL28	0.2043	1.2525	0.1253
Q8N108	MIER1	-0.383	2.0885	0.4882
O95429	BAG4	-0.1991	1.3014	0.1356
O14972	DSCR3	-0.3035	0.4708	1.3252
Q14764	MVP	-0.0832	0.4178	0.2731
Q07864	POLE	0.4645	1.1033	2.0404
Q9GZQ3	COMMD5	0.1234	0.9853	0.1781
Q9NPE3	NOP10	0.1011	0.666	0.0063
O00566	MPHOSPH10	0.1027	0.2284	0.388
P06748	NPM1	-0.2253	0.5081	1.1582
Q86SX6	GLRX5	0.0921	0.4219	0.8474
P63261	ACTG1	0	0	0
P68036	UBE2L3	0.0789	0.0947	0.2341
P51116	FXR2	0.3347	0.8498	0.7006
Q8IYT4	KATNAL2	-0.1966	1.6531	0.0168
Q9UKF6	CPSF3	-0.263	0.3481	1.8558
P07741	APRT	0.0011	0.9287	0.7309
Q9H2H8	PPIL3	-0.0088	0.9883	0.6678
Q8WYA6	CTNNBL1	-0.0368	0.6	0.1766
O60343	TBC1D4	0.1346	0.7453	0.169
Q9NVE7	PANK4	0.0557	0.1269	0.4028
Q16762	TST	-0.5434	1.6845	0.7936
P62714	PPP2CB	0.1741	0.5417	0.3424
Q6P6B7	ANKRD16	-0.076	0.4508	0.8599
Q9P2T1	GMPR2	0.2061	0.8133	0.0087
O95466-2	FMNL1	0.2769	0.5251	1.1672
H3BUX1	MSLN	0.2344	2.4647	0.3826
P16333	NCK1	-0.0246	0.4718	0.8461
P61009	SPCS3	0.0578	1.6727	2.3936
O95373	IPO7	0.0772	0.467	0.1249
Q5VZK9	LRRC16A	0.0179	0.7054	0.3885
P13928	ANXA8;ANXA8L2;ANXA8L1	0.0719	0.1702	0.036
Q8IWR0	ZC3H7A	0.0611	0.2132	0.0029
Q96B36	AKT1S1	0.1154	0.3109	0.2786
Q969E8	TSR2	-1.3224	2.2414	2.1411
Q5J8M3	EMC4	0.6355	0.9763	1.2845
Q6P3X3	TTC27	-0.4191	0.6152	0.7753
Q05D32	CTDSPL2	-0.0387	0.1016	0.06
Q9Y4X5	ARIH1	-0.1789	0.6052	0.2206
Q8TDD1	DDX54	-0.164	0.3006	0.7843
O00410	IPO5	-0.4496	1.1868	3.2245
Q6P1Q9	METTL2B;METTL2A	0.0486	0.2701	0.0052
O00471	EXOC5	0.1571	0.6915	0.1246
Q9BS16	CENPK	-0.256	0.82	0.3243
O00584	RNASET2	0.0354	0.2757	0.4924
Q96FF9	CDCA5	0.2261	0.2644	1.9244
Q9H6S0	YTHDC2	-0.2905	1.5588	0.4416
Q9Y679	AUP1	0.1319	0.5551	1.3358
Q9H9B4	SFXN1	0.265	0.5118	1.2171
P34931	HSPA1L	0.3353	0.3336	1.4916
Q8IZP0	ABI1	-0.4723	0.3491	0.9725
Q14141	SEPT6	-0.1948	0.1441	0.0825
P22061	PCMT1	-0.0608	1.0578	0.4348
Q96JH7	VCPIP1	-0.0133	0.8376	0.9658
Q5SRQ6	CSNK2B;CSNK2B-LY6G5B-1181	0.1243	0.4197	0.2152
Q14004	CDK13	0.008	0.2196	0.0936
P35251	RFC1	0.0003	0.0343	0.0617
O60264	SMARCA5	-0.0196	0.0505	0.0906
O14745	SLC9A3R1	0.4445	1.0471	3.74
Q9Y6D5	ARFGEF2	-0.1132	0.0976	0.6712
Q6NUK4	REEP3	0.2289	0.3758	0.0375
Q9BYP7	WNK3	-0.2344	0.3235	0.5707
Q9NZL4	HSPBP1	-0.1956	0.2812	0.9245
Q6IBS0	TWF2	-0.118	0.8665	0.0316
P55011	SLC12A2	-0.2884	0.539	1.1917
O43414	ERI3;PRNPIP	0.2565	0.5197	0.6733
Q15910	EZH2	-0.3112	1.0577	0.3792
Q9Y4E5	ZNF451	-0.2977	0.0697	1.2398
Q5T1M5	FKBP15	0.159	0.0536	0.7854
O14545	TRAFD1	0.1744	0.2915	0.4457
O75817	POP7	0.4989	1.4626	0.0552
Q8TDP1	RNASEH2C	-0.1687	0.0153	0.977
P29144	TPP2	-0.8156	1.1933	5.2279
Q16539	MAPK14	-0.0189	0.601	0.4759
Q14191	WRN	-0.1035	0.052	0.4591
Q9BTX7	TTPAL	-0.3647	0.7587	0.6755
P23743	DGKA	-0.1456	0.3339	0.2984
Q9P206-2	KIAA1522	-0.1992	0.8749	0.2689
Q96FJ2	DYNLL2	-0.235	1.2048	0.0716
Q12906	ILF3	0.2979	0.2917	1.1949
Q8NF37	LPCAT1	0.3393	1.7227	0.8101
Q96ST3	SIN3A	0.2391	0.4405	0.7701
Q9Y3B7	MRPL11	-0.3566	2.3568	0.5567
Q9H936	SLC25A22	0.3207	0.6366	1.6841
Q7Z5L9	IRF2BP2	-0.4515	1.907	2.0887
Q9H4L5	OSBPL3	-0.5721	0.3954	5.5667
Q8TE02	ELP5	-0.262	0.0813	0.2284
O60830	TIMM17B	-0.4748	2.0151	0.5728
P26640	VARS	0.0746	0.3637	0.1364
Q9UBF2	COPG2	-0.0506	0.0345	0.2237
Q6ZXV5	TMTC3	-0.0425	0.1347	0.2454
Q9NPD8	UBE2T	0.0681	1.0894	0.3857
Q14204	DYNC1H1	0.0263	0.1842	0.3644
P08240	SRPR	0.3846	1.4298	1.1371
Q9BWD1	ACAT2	-0.1009	0.9251	0.1149
Q32MZ4	LRRFIP1	-0.0161	0.0918	0.1716
Q9Y3A2	UTP11L	0.0624	0.304	0.0978
Q05193	DNM1	-0.1759	1.0511	0.1302
Q92889	ERCC4	0.4231	0.9717	0.8889
Q6SPF0	SAMD1	0.8574	1.8116	2.2322
Q8TAG9	EXOC6	-0.0441	0.532	0.0009
Q9UP83	COG5	0.3043	0.3686	0.9415
P61769	B2M	0.1638	0.0158	0.8223
O00425	IGF2BP3	0.0975	0.1094	0.5926
Q15366-5	PCBP2	-0.6211	0.1826	1.0883
Q15233	NONO	-0.0784	0.1477	0.34
P51153	RAB13	0.7366	1.0472	1.9824
Q9NWU5	MRPL22	-0.2113	0.239	0.6406
Q8NB78	KDM1B	0.2567	0.8807	0.2376
Q8WUW1	BRK1	-0.2768	1.1471	0.0502
Q9NRP0	OSTC	-0.0452	0.4571	0.2312
Q9Y6G5	COMMD10	0.1688	0.515	0.3417
P10768	ESD	-0.3219	0.9274	1.903
Q9HCE1	MOV10	-0.366	1.4067	1.1365
Q9UGV2	NDRG3	-0.1949	0.2346	0.8743
Q99584	S100A13	-0.0292	0.0181	0.0737
P15586	GNS	-0.1911	0.3094	0.8479
Q9Y5L4	TIMM13	0.043	0.5142	0.2062
P05387	RPLP2	0.1001	0.1609	0.5369
Q96CP2	FLYWCH2	0.3791	2.4797	0.166
O14684	PTGES	1.4585	3.0114	2.0618
F5H345	HMBS	-0.0445	0.1233	0.1142
Q9BSJ2	TUBGCP2	-0.026	0.3027	0.3274
Q9BYC8	MRPL32	-0.3013	0.5563	0.8849
P01111	NRAS	-0.0471	0.3257	0.7422
P50750	CDK9	0.351	0.9151	1.4787
Q14643	ITPR1	0.4703	1.0775	2.4128
Q9C0D5	TANC1	-0.0745	0.5452	0.1325
Q63HN8	RNF213	0.4775	1.4376	0.6533
Q13107	USP4	-0.1902	0.7032	1.441
P43121	MCAM	0.7324	3.4054	1.7595
Q96JG6	CCDC132	0.3096	0.9647	0.2311
Q8IWZ3	ANKHD1	0.1792	0.2981	0.9425
P62253	UBE2G1	-0.1076	0.3284	0.1771
P15170-2	GSPT1;GSPT2	-0.0457	1.225	0.4121
Q14202	ZMYM3	-0.289	1.1251	0.9472
P09622	DLD	-0.1617	1.0708	2.021
Q6PID6	TTC33	-0.2285	1.7171	0.2471
Q16773	CCBL1	0.2612	0.2962	0.5131
Q96J02	ITCH	-0.1711	0.0095	0.818
Q15386	UBE3C	0.2224	0.8922	0.1385
Q8N3R9	MPP5	0.4457	0.5914	2.189
Q8NE86	MCU	0.2615	1.1834	0.2672
P30740	SERPINB1	0.2941	1.5909	0.7084
Q5TBA9	FRY	-0.0548	0.308	0.022
Q7Z4H8	KDELC2	-0.0235	0.6737	0.3924
O95235	KIF20A	0.0801	0.7344	0.1277
Q9H6R4	NOL6	-0.0566	0.0242	0.2877
Q9NTK5	OLA1	-0.0394	0.5629	0.2918
Q9P2W1	PSMC3IP	-0.1056	0.1317	0.098
Q86VP6	CAND1	-0.0914	0.2924	0.298
Q9Y6X9	MORC2	-0.5433	0.3922	2.2105
Q15424	SAFB	-0.2508	1.2655	0.9539
Q9P265	DIP2B	-0.5195	1.8391	1.8713
O00148	DDX39A;DDX39	0.1124	0.0381	0.8345
O94880	PHF14	0.0574	0.7895	0.4808
P53999	SUB1	0.0588	0.3917	0.0159
Q7LGA3	HS2ST1	0.1362	1.1546	1.7408
Q8NFC6	BOD1L1	-0.2698	1.8031	0.3841
Q9BTW9	TBCD	-0.0953	0.1301	0.5503
Q8NEC7	GSTCD	-0.1213	0.1053	0.5551
Q9BUH6	C9orf142	-0.3623	2.1416	0.8726
Q29RF7	PDS5A	-0.1034	0.6716	0.1925
P41091	EIF2S3;EIF2S3L	-0.0954	0.174	0.5839
Q9HCN8	SDF2L1	0.0361	0.5739	0.7738
O75182	SIN3B	-0.3409	0.0508	1.7459
P23497	SP100	-0.3498	0.2743	0.9819
Q9Y4F1	FARP1	0.0868	0.2183	0.0435
O75962	TRIO	-0.1108	1.1483	0.1881
Q14683	SMC1A	-0.1075	0.377	0.3326
P18858	LIG1	0.2825	0.7712	1.3472
Q9NUL3	STAU2	-0.3221	0.979	1.1774
Q8TBP6	SLC25A40	-0.4107	1.7957	0.0869
O00299	CLIC1	-0.052	0.3258	0.0608
P32119	PRDX2	-0.2153	0.4539	1.1162
Q9NV35	NUDT15	0.1603	0.3074	0.3148
P55263	ADK	-0.8537	4.824	2.0167
O94875	SORBS2	-0.2355	0.0617	0.8033
P07195	LDHB	-0.1177	0.1562	0.7535
Q9UMX0	UBQLN1	-0.0568	0.2468	0.0875
O95394	PGM3	0.4945	0.5533	3.3437
P62701	RPS4X	0.0231	0.3934	0.1442
P28340	POLD1	-0.2062	1.4788	0.321
P12956	XRCC6	-0.0307	0.1328	0.3399
P61225	RAP2B;RAP2A	-0.2482	0.0506	1.2656
P32321	DCTD	0.0256	0.3817	0.1992
O96008	TOMM40	0.1167	0.2627	0.3877
Q8IWL3	HSCB	-0.2552	0.33	0.7175
Q13501	SQSTM1	0.203	0.6677	2.6462
O00505	KPNA3	0.008	0.0561	0.0385
Q9NY93	DDX56	-0.2044	0.197	0.9723
Q5TFE4	NT5DC1	0.3854	1.4507	0.3126
Q12982	BNIP2	0.4913	1.5378	0.9042
Q9UGU5	HMGXB4	-0.5598	1.3808	0.5292
Q8WUY1	THEM6	0.3967	1.3937	1.9972
P05204	HMGN2	-0.1214	1.8547	0.8299
Q8N884	MB21D1	0.6774	0.7631	2.433
Q9Y4C8	RBM19	0.6147	2.0817	1.5507
Q13509	TUBB3	0.1326	1.5396	0.5546
Q96AE4-2	FUBP1	-0.3178	1.1089	1.4127
P42126	ECI1;DCI	0.1437	0.6477	0.2085
Q8WVK2	SNRNP27	-0.1016	1.0167	0.7681
Q03252	LMNB2	-0.2144	1.1137	0.6038
P13716	ALAD	-0.5488	0.3568	1.529
P41227	NAA10	-0.2213	1.8463	0.2884
P62851	RPS25	0.0057	0.0104	0.0387
H0YLX8	PSTPIP1	-0.1503	0.1569	0.898
Q96KG9	SCYL1	0.3275	0.5694	1.898
H7C455		-0.0502	0.0101	0.3856
P14174	MIF	-0.157	1.0187	0.2916
Q9UEE9	CFDP1	0.107	0.2517	0.9451
Q14677-3	CLINT1	-0.2772	0.1658	3.1971
P33993	MCM7	0.1479	0.9415	0.3721
Q12789	GTF3C1	-0.259	0.3516	1.1888
Q9Y478	PRKAB1	0.1142	1.8	0.3159
P67936-2	TPM4	-0.4188	2.083	0.0232
Q9NVV4-2	MTPAP	-0.4318	0.4302	2.0914
P04264	KRT1	0.4398	0.1836	0.1575
G5E9E7	TJP1	-0.1983	0.2636	1.1594
Q8IU81	IRF2BP1	-0.4072	2.9336	0.2151
Q8IY17	PNPLA6	-0.1659	0.1998	0.4396
Q9Y3X0	CCDC9	-0.0236	0.5178	0.8798
Q92614	MYO18A	-0.4437	0.9555	0.9446
Q9UJA5	TRMT6	0.4046	1.01	0.8046
P53602	MVD	0.55	0.3431	2.7144
Q14244	MAP7	0.6233	0.1521	4.0619
Q13085	ACACA	0.0828	0.3088	0.1877
P11586	MTHFD1	-0.0054	0.014	0.0066
P13804	ETFA	-0.0757	0.2409	0.1851
Q9H0P0	NT5C3A	0.4852	0.3774	4.2708
Q7Z3U7	MON2	-0.2035	0.3466	0.8583
Q9Y2D5-4	AKAP2	0.2833	1.144	0.3358
O95478	NSA2	0.0111	0.8557	0.7833
Q12830	BPTF	0.1328	0.0357	0.6416
B3KXH8		0.0913	0.2025	0.085
Q9ULD2-3	MTUS1	-0.1568	0.1635	0.794
Q12802	AKAP13	0.0175	0.2438	0.1142
Q6IBW4	NCAPH2	-0.1614	2.0305	0.314
Q6NVY1	HIBCH	-0.5151	5.2579	0.342
Q9BUB7	TMEM70	-0.0924	0.9861	0.178
Q15843	NEDD8	0.295	0.3398	1.4765
O43286	B4GALT5	0.6436	1.5719	2.8491
Q6PL18	ATAD2	0.1386	0.2607	1.2462
Q9P2N5	RBM27	-0.0738	0.0439	0.3408
P12814	ACTN1	-0.0784	0.7479	0.0006
P50914	RPL14	-0.1396	0.1504	0.6075
Q9NVM6	DNAJC17	-0.297	1.2772	0.2273
Q86U42	PABPN1	0.0047	0.2208	0.1903
Q8WW22	DNAJA4	0.6027	0.5155	0.6891
Q9Y5M8	SRPRB	0.2571	1.1182	0.9704
P07305	H1F0	-0.1471	0.5317	0.1289
P37840	SNCA;SNCB	0.1406	0.8976	0.1534
O00165	HAX1	0.1557	0.2778	0.9523
Q9H832	UBE2Z	-0.3407	0.9806	1.0166
Q6P158	DHX57	-0.6846	1.5122	2.3264
Q8IZL8	PELP1	0.0169	0.4264	0.2356
Q8NBJ4	GOLM1	0.4132	0.2875	1.5184
Q9BXV9	C14orf142	-0.1265	0.9039	0.1017
P35270	SPR	0.1562	0.9638	0.1996
Q5T7W7	TSTD2	0.102	0.0975	0.3791
Q96KB5	PBK	-0.0608	0.173	0.0648
Q96RQ1	ERGIC2;RLN3	1.6833	2.1214	3.0219
P48735	IDH2	0.272	0.3192	1.3089
P51148	RAB5C	0.2175	0.4987	0.9522
Q09028	RBBP4	-0.2314	0.4516	1.0992
A1X283	SH3PXD2B	-0.0107	0.0485	0.0508
Q5VSL9	STRIP1	0.0639	0.3318	0.0285
O43175	PHGDH	0.0222	0.0457	0.1677
Q8WUD4	CCDC12	-0.2943	1.0398	0.1205
P00441	SOD1	-0.0656	0.097	0.504
O75352	MPDU1	-0.1092	0.4267	1.1495
Q8IY95	TMEM192	0.3844	0.445	1.3603
Q96Q11	TRNT1	-0.2329	1.5906	0.146
Q8NBI5	SLC43A3	0.1349	0.1835	0.8266
Q9UIQ6	LNPEP	-0.1217	0.0334	0.6022
O00154-4	ACOT7	-0.0161	0.0464	0.0059
Q9H974	QTRTD1	-0.2448	0.607	0.0681
O75027	ABCB7	0.1303	0.0163	0.7155
O75822	EIF3J	0.0259	0.6118	0.7062
Q7Z6M1	RABEPK	-0.2564	0.1166	0.9003
P01024	C3	0.2679	0.234	0.6475
O95379-3	TNFAIP8	-0.1887	0.6064	0.5888
O75477	ERLIN1	0.2964	1.2104	1.3434
P19256-3	CD58	-1.0414	0.2431	6.1858
Q8WXA9	SREK1	-0.1464	0.5309	0.0578
Q9HCG8	CWC22	0.2316	1.7381	0.0162
Q9H4B0	OSGEPL1	-1.2039	1.5059	4.5394
O15270	SPTLC2	0.4186	1.1294	2.2587
O00411	POLRMT	-0.1423	0.8107	0.0614
O15554	KCNN4	-0.6008	0.1033	0.2362
P25789	PSMA4	-0.3618	0.9712	2.416
Q9NWZ5	UCKL1	-0.2067	0.7627	1.8541
Q5TZA2	CROCC	0.1389	0.2326	0.1369
P09497-2	CLTB	-0.0084	0.3666	0.3241
O75886	STAM2	-0.6643	0.5632	5.868
Q15181	PPA1	-0.0842	0.0686	0.5751
Q04837	SSBP1	0.0001	0.7069	0.6131
Q9BRQ6	CHCHD6	-0.1018	0.4034	0.6387
Q9H6S3	EPS8L2	-0.1411	0.2277	0.1759
P82664	MRPS10	0.0852	0.1477	0.2957
Q9NXW2	DNAJB12	0.4587	0.1395	3.3553
P68402	PAFAH1B2	-0.565	2.3792	1.9
O00541	1	-0.0981	0.2192	1.0006
Q7L4I2	RSRC2	0.0322	0.4405	0.6185
Q641Q2	FAM21A;FAM21B	0.1371	0.2326	0.236
Q9P0I2	EMC3	0.1764	0.8334	0.0696
P63272	SUPT4H1	-0.0126	0.2352	0.1881
Q9Y2V2	CARHSP1	-0.1503	0.2055	0.2705
P20248	CCNA2	-0.1707	0.6416	1.7184
Q8TDN6	BRIX1	-0.1246	0.0225	0.9552
P05023	ATP1A1	-0.0374	0.3058	0.6825
Q9Y4C1	KDM3A	0.0961	1.2502	1.9581
P08754	GNAI3	-0.0334	0.6775	0.6494
O00203	AP3B1	0.4153	2.3188	1.3738
Q6Y7W6	GIGYF2	0.2056	0.2583	0.8997
Q04206	RELA	-0.0719	0.0034	0.3495
H0Y9G5	WFS1	0.3202	0.6616	0.189
P98170	XIAP	-0.5254	1.9696	0.9268
P13984	GTF2F2	-0.017	0.1641	0.027
P30041	PRDX6	-0.2861	0.8108	1.3422
Q99816	TSG101	0.1166	0.0928	0.2497
O00170	AIP	-0.0741	0.0861	0.5042
Q5VYS8	ZCCHC6	0.0537	0.2575	0.3422
P20290-2	BTF3	-0.2147	0.4713	0.8699
Q8IXK0	PHC2	-0.2392	0.3688	1.5019
Q9UPW0	FOXJ3	0.3626	1.9909	0.7599
Q9NTI5	PDS5B	0.1644	0.2237	0.8683
O15226	NKRF	-0.0723	0.1652	0.1925
Q99747	NAPG	0.4348	0.7056	2.6188
Q5VWN6	FAM208B	0.0197	0.6115	0.2513
O14974	PPP1R12A	0.0308	0.0665	0.2645
Q9BTA9	WAC	0.1924	0.2628	0.818
O60306	AQR	-0.1031	0.3793	0.176
Q9UJX2	CDC23	0.1764	0.8286	0.2448
Q9BRS2	RIOK1	-0.2729	0.0888	1.4859
Q14161	GIT2	-0.6336	0.268	3.13
Q96BN8	OTULIN	-0.7599	1.1079	4.9413
Q9UQB8	BAIAP2;CCDC43	-0.2272	0.4486	0.6918
E7EST9	USP19	-0.245	0.4977	0.5988
Q7Z7K6-3	CENPV	-0.1572	0.7788	0.2255
Q9BY42	RTFDC1	-0.0748	0.1195	0.5424
O75170	PPP6R2	-0.2955	0.3417	2.2988
P09038	FGF2	-0.0078	0.1272	0.0895
P51648	ALDH3A2	-0.0288	0.0082	0.1696
Q9HCK8	CHD8	-0.0455	0.0552	0.1885
Q0VDG4	SCRN3	-0.1691	0.2809	0.0431
Q9BVL2	NUPL1	0.2819	0.984	0.6886
Q8N567	ZCCHC9	0.1374	0.5615	0.1428
P12694	BCKDHA	0.2178	0.1042	1.3205
A4D2Q0	UNC84A;SUN1	0.6463	1.9849	2.1319
P49755	TMED10	-0.0738	0.2986	0.6755
O43933	PEX1	0.1125	0.2516	0.3052
B7Z4Q3	C7orf55	0.3764	0.7757	0.3379
P13489	RNH1	-0.1718	0.3528	0.8753
Q5T9L3	WLS	-0.0913	0.3138	0.6101
P28072	PSMB6	-0.3127	0.2929	1.8455
Q4KMQ2	ANO6	0.1363	0.2688	0.5089
P60983	GMFB	-0.1327	1.3324	0.3415
B4DP36	CALCOCO2	0.0016	0.087	0.0261
Q96JM3	CHAMP1	-0.3462	1.3957	0.3848
O60934	NBN	0.0602	0.0227	0.3461
O14957	UQCR11	-0.2536	0.5224	0.8705
Q969X5	ERGIC1	0.2119	0.6217	0.5243
P55809	OXCT1	-0.1956	2.8093	0.1242
P01106	MYC	-0.0309	0.3731	0.2011
P11117	ACP2	0.0943	0.0044	0.5013
P35813	PPM1A	0.5062	0.1033	1.1858
P55145	MANF	0.6401	1.7108	3.6339
P54709	ATP1B3	-0.066	0.176	0.0713
Q9UPQ0-10	LIMCH1	0.1545	0.1832	0.8048
P40818	USP8	-0.1915	0.0436	1.4874
Q13885	TUBB2A;TUBB2B	0.0823	0.7401	0.3647
Q9C0J8	WDR33	0.3001	1.0127	0.4013
Q8TF68	ZNF384	-0.5469	1.9751	1.2105
Q9NW68	BSDC1	-0.0678	0.5541	0.1852
P29317	EPHA2	0.3854	1.9161	0.6407
Q9H3K2	GHITM	0.311	0.0474	1.7755
Q8N6H7	ARFGAP2	-0.1263	0.1109	0.792
O75175	CNOT3	-0.3304	0.5528	0.8815
Q9H488	POFUT1	0.256	1.1099	0.2552
P07203	GPX1	0.5815	3.4684	2.1292
Q96HC4	PDLIM5	-0.1373	0.0632	0.7675
Q9NX55	HYPK	-0.0961	0.1847	0.3856
Q8TF05	PPP4R1	-0.2969	0.7222	1.7418
P49674	CSNK1E;CSNK1D	0.3211	1.3797	0.4834
P54920	NAPA	0.2574	0.2899	1.7872
Q7Z2K6	ERMP1	0.1034	0.1294	0.429
Q13153	PAK1	-0.799	3.7625	2.2662
Q9ULC4	MCTS1	0.0496	0.0284	0.3047
Q08J23	NSUN2	0.1308	0.9864	0.2028
P19971	TYMP	-0.6966	2.2034	0.471
P35998	PSMC2	0.0577	0.0537	0.4137
P48739	PITPNB	-0.0744	0.1674	0.1977
P42285	SKIV2L2	-0.1676	0.1552	1.2792
Q9BYT8	NLN	-0.1478	0.0895	1.2706
Q63HM9	PLCXD3	0.0367	0.7815	0.6239
P29590	PML	-0.0192	0.0468	0.2052
Q8TDI8	TMC1	-2.964	9.5022	7.9918
Q8WZA9	IRGQ	0.4245	1.4318	0.8989
Q709C8	VPS13C	-0.644	1.7899	1.2862
O15258	RER1	0.1705	0.3608	1.3297
Q9NVU0	POLR3E	-0.1191	1.2623	0.2817
O60879	DIAPH2	0.2211	0.4541	0.69
Q9BQI0	AIF1L	0.0535	0.4222	0.3991
Q9BQG0	MYBBP1A	0.0295	0.4991	0.1423
P83731	RPL24	0.0735	1.1875	0.5707
Q7Z434	MAVS	-0.1547	0.4881	1.16
A5PLN9	TRAPPC13	0.1952	0.2128	0.4613
Q92547	TOPBP1	-0.6817	0.1425	3.0785
Q9ULK4	MED23	-0.0118	0.0104	0.0246
Q92973	TNPO1	0.2655	0.9923	1.4094
P17676	CEBPB	-0.0718	0.1056	0.4663
Q9H444	CHMP4B	-0.1268	0.2428	0.514
Q08623	HDHD1	0.519	2.2948	1.2846
P10599	TXN	-0.1522	0.7723	0.5104
Q15532	SS18;CD63	-0.1918	0.0907	0.1572
Q7Z7C8	TAF8	-0.1736	0.6367	0.1215
O95155	UBE4B	-0.1583	0.5257	0.5874
E7EX90	DCTN1;DKFZp686E0752	0.0152	0.5407	0.265
Q8WVQ1	CANT1	0.1368	0.0511	0.908
Q5VV41	ARHGEF16	0.0325	1.3165	0.6443
O43592	XPOT	-0.089	0.0378	0.7577
Q9NX08	COMMD8	0.0227	0.5453	0.2776
O95433	AHSA1	-0.0337	0.1631	0.2507
Q9Y666	SLC12A7	0.2888	0.124	0.9079
P63313	TMSB10	-0.1094	0.5492	0.1255
Q6YHU6	THADA	0.315	1.172	0.2953
O60287	URB1	0.0273	0.4886	0.3092
Q9UGJ1	TUBGCP4	-1.0377	6.8985	3.8478
Q9BVS4	RIOK2	0.3895	1.7058	0.6266
Q8N684	CPSF7	-0.0789	0.3265	0.6621
O43819	SCO2	0.5438	0.6919	1.6435
Q9Y6K9	IKBKG	0.0196	0.262	0.1465
P49458	SRP9	0.1718	0.6511	0.6172
P49754	VPS41	0.4275	1.6195	0.9255
P98082	DAB2	0.0288	0.2116	0.0038
Q9UNS1	TIMELESS	0.2519	1.8824	0.3114
Q9UNX4	WDR3	-0.0458	0.4805	0.667
Q9Y282	ERGIC3	-0.0698	0.9324	0.2737
O00186	STXBP3	-0.2721	0.5869	0.9851
P55957	BID	-0.4162	0.6213	1.155
Q9NY12	GAR1	-0.1893	0.566	0.8486
Q9H9E3	COG4	0.0533	0.0138	0.2574
P19387	POLR2C	-0.2272	0.0915	0.9722
Q15654	TRIP6	0.4163	0.5255	2.4302
O43252	PAPSS1	-0.014	0.0567	0.0231
O95239	KIF4A;KIF4B	-0.0067	0.2892	0.1489
Q06830	PRDX1	0.095	0.0223	0.5987
P14406	COX7A2	-0.2514	0.6685	1.2045
Q9BRP1	PDCD2L	0.123	1.1128	0.2398
Q16537	PPP2R5E	-0.4161	1.658	0.9279
Q6UXV4	APOOL	0.1123	1.1107	0.177
Q8IUI8	CRLF3	-0.2691	0.2218	1.2185
O75348	ATP6V1G1	0.1704	0.6277	0.1841
Q15020	SART3	0.0806	0.3353	0.2781
O94761	RECQL4	0.4462	0.7939	2.3416
O96005	CLPTM1	0.6671	0.3891	4.0811
Q8IXH7	NELFCD	0.5818	1.6038	0.7585
P99999	CYCS	-0.3261	1.8073	0.0068
Q8N4C8	MINK1	0.4763	1.3093	2.2357
Q96BP3	PPWD1	-0.0337	0.0563	0.1269
Q9NRZ9	HELLS	-0.5995	2.4038	2.5435
P42858	HTT	-0.0589	0.053	0.3143
Q9P2P1	NYNRIN	0.1765	0.7775	2.0614
P17066	HSPA6;HSPA7	0.0152	0.4817	0.3946
P30519	HMOX2	0.1566	0.3104	0.7897
Q12849	GRSF1	-0.1552	0.5113	0.513
P14550	AKR1A1	0.2601	0.6653	1.4168
Q9UHQ9	CYB5R1	0.1743	0.1988	0.9567
Q08211	DHX9	-0.1101	0.3494	0.6319
Q07812	BAX	-0.0448	0.0384	0.1966
Q5JTZ9	AARS2	0.367	0.5502	1.2862
Q96GX9	APIP	-0.5967	3.1611	0.7804
Q14165	MLEC	-0.4205	2.9334	0.8984
P25815	S100P	1.6488	8.4729	5.4024
Q96GG9	DCUN1D1	0.1532	0.578	1.606
O00178	GTPBP1	0.0084	0.0165	0.0281
Q13889	GTF2H3	0.0576	0.4289	0.1654
Q9UPY8	MAPRE3	0.1663	0.9345	0.068
Q8TCC3	MRPL30	0.0714	0.4881	0.0663
O00273	DFFA	-0.0835	0.0467	0.3537
Q14432	PDE3A	-0.6361	1.2477	3.1351
Q7Z6Z7	HUWE1	-0.1704	0.5728	0.9176
O95793	STAU1	0.5503	0.0097	2.9416
P51857	AKR1D1	0.3269	0.9627	0.3836
P60709	ACTB	-0.1978	0.3853	1.0824
Q99653	CHP1	0.2109	0.0197	1.1202
O95149	SNUPN	-0.0011	0.1126	0.1194
P30626	SRI	-0.1381	0.0335	0.9174
Q7L5Y9	MAEA	0.484	0.5322	2.0331
Q8IY18	SMC5	-0.2362	0.0654	1.0126
Q8WV60	PTCD2	0.5325	1.4387	0.2687
O00571	DDX3X;DDX3Y	0.056	0.3368	0.0832
A6NKT7	RGPD3;RGPD4;RGPD8;RGPD5;RGPD1	0.2113	0.6121	0.6128
Q15257	PPP2R4	0.1336	0.8209	0.3548
Q9H6T3	RPAP3	-0.023	0.1409	0.2635
Q92785	DPF2	0.175	0.2161	0.5673
O60573	EIF4E2	-0.3952	1.0084	1.0955
P12081	HARS	0.0403	0.3409	0.3391
Q86WJ1	CHD1L	0.1404	0.1751	0.4399
Q16352	INA	0.4224	0.115	1.7324
Q03111	MLLT1	0.1812	1.0513	0.1712
Q9BPW8	NIPSNAP1	-0.0256	0.08	0.1096
P60953	CDC42	-0.0123	0.0603	0.0106
P52597	HNRNPF	-0.0236	0.0342	0.1305
Q53GS9	USP39	0.0217	0.2598	0.4364
Q9H9A6	LRRC40	-0.2939	1.5456	0.4022
O14732	IMPA2	0.0253	0.6593	0.3631
P31939	ATIC	-0.0092	0.2382	0.2392
P09488	GSTM1	0.0485	0.4394	0.0187
Q9UI09	NDUFA12	-0.326	2.2218	0.4151
Q9H903	MTHFD2L	0.2293	0.6705	0.5922
Q8IV38	ANKMY2	0.1422	0.3442	0.2864
P40939	HADHA	-0.1818	1.5537	0.2169
Q96C01	FAM136A	0.3531	0.9661	0.6268
Q5TBB1	RNASEH2B	0.4096	1.1757	0.5586
Q9NP81	SARS2	0.2477	0.366	0.8241
P49756	RBM25	0.0435	0.0045	0.261
O43156	TTI1	-0.5976	1.7897	2.4078
Q16851	UGP2	0.0112	0.1113	0.0199
Q9C0E2	XPO4	-0.0717	0.7806	0.8953
Q08629	SPOCK1	-0.2803	1.1674	0.8945
Q7LBC6	KDM3B	-0.1889	0.3448	0.9279
Q13330	MTA1	-0.0746	0.155	0.1374
P48723	HSPA13	0.3242	1.0982	1.0833
Q02127	DHODH	-0.6703	2.9374	1.557
Q9BRP4	PAAF1	-3.0909	0.598	0.0856
P53365	ARFIP2	1.0834	1.589	2.8471
P43490	NAMPT;NAMPTL	0.0877	0.3982	0.118
P55060	CSE1L	-0.0547	0.0838	0.4358
O43390-2	HNRNPR	-0.3054	0.0082	1.8301
Q9HD20	ATP13A1	0.2651	1.5349	0.5727
P78316	NOP14	0.0741	0.7613	0.1607
Q76FK4	NOL8	0.1201	0.273	0.296
O95757	HSPA4L	0.023	0.2862	0.4466
P62993	GRB2	0.6675	3.2562	2.2343
Q5T5P2	KIAA1217	-0.8332	0.6066	1.1539
Q9NWB6	ARGLU1	-0.0085	0.103	0.231
Q96ER9	CCDC51	0.1776	0.0414	1.1129
M0QZM1	HNRNPM	0.2684	0.1257	1.1818
Q9Y673	ALG5	-0.1235	1.2978	0.4282
P10809	HSPD1	0.0731	0.4813	0.1236
Q9H9J2	MRPL44	-0.1222	0.5449	0.3176
O00743	PPP6C	0.1252	0.6672	0.0822
P35580	MYH10	-0.2035	0.6426	0.7838
Q9UFC0	LRWD1	-0.0793	0.2804	0.1156
P15291	B4GALT1	0.8609	2.6581	2.0516
Q9BXB5	OSBPL10	0.078	0.6845	0.1403
Q86YQ8	CPNE8	-0.0128	1.8113	1.7685
Q9P2J5	LARS	-0.1064	0.1765	0.7101
P51665	PSMD7	0.0036	0.0239	0.0451
E9PLQ8		0.0352	0.0358	0.2669
Q9Y248	GINS2	-0.2571	0.1857	1.0746
Q9Y3Y2	CHTOP	0.0032	1.2008	1.2845
Q00341	HDLBP	0.3141	0.5681	1.6952
Q86V21	AACS	0.3327	1.7314	0.3896
Q9BVK6	TMED9	0.0511	0.0023	0.313
Q16222	UAP1	-0.1565	0.1264	0.8737
P11021	HSPA5	0.2225	0.8327	0.9728
Q86YP4	GATAD2A	-0.1933	0.3282	0.7026
O95376	ARIH2	-0.277	0.6666	0.3987
Q9ULT0	TTC7A	-0.2057	0.0077	1.5974
Q9UKD2	MRTO4	-0.166	0.2234	1.0784
P62633-4	CNBP	-0.2283	0.0292	1.1943
Q7KZI7	MARK2	0.2084	0.1247	1.6403
Q9NRF8	CTPS2	0.2243	0.405	0.639
Q7Z4S6	KIF21A	-0.1313	0.0318	0.5872
Q16656	NRF1	-0.5816	1.6631	0.6344
Q9Y697	NFS1	0.1351	0.2633	0.3595
Q01581	HMGCS1	0.2429	1.0461	2.9977
Q6XQN6	NAPRT	0.2	0.6996	0.3779
Q9BZD4	NUF2	0.0454	0.0325	0.0614
P17050	NAGA	-0.0158	0.091	0.0973
Q53FA7	TP53I3	0.1253	0.1635	0.8767
H0YMJ0	MORF4L1	0.0176	0.8539	0.5218
O00303	EIF3F	-0.0277	0.2859	0.0759
Q15345	LRRC41	0.7481	0.7394	1.7069
Q9NZT2	OGFR	0.2956	1.4374	0.7668
Q9NR56	MBNL1	-0.2262	1.2105	0.5619
P00390	GSR	0.0098	0.4142	0.2502
Q8NFH5	NUP35	-0.1149	0.4261	1.5468
Q6P2H3	CEP85	0.9455	1.7536	1.7553
Q7Z406	MYH14	0.1686	0.7704	0.0535
Q9BYD2	MRPL9	-0.1524	0.4848	0.3768
Q8TBX8	PIP4K2C	0.2143	0.0962	0.9031
Q9BRT3	MIEN1	0.0495	0.1509	0.0604
Q9NUQ3	TXLNG	0.0615	0.5579	0.1646
Q15366-2	PCBP2	-0.1978	0.7272	0.3871
Q01105-2	SET	-0.1714	0.2418	0.3317
Q8WW12	PCNP	-0.2251	1.6982	0.0937
Q9Y3B4	SF3B6	-0.0843	0.3196	0.0066
P82673	MRPS35	0.0608	0.2366	0.7578
Q13557	CAMK2D	0.1502	0.5791	0.2388
P49790	NUP153	-0.0403	0.2401	0.0289
P35610	SOAT1	0.1868	0.1855	1.0106
Q9NVR5	DNAAF2	-0.0737	0.3522	0.45
Q9BZ29-4	DOCK9	-0.0126	0.2269	0.135
Q96ST2	IWS1	0.1437	0.7086	0.0627
O60716	CTNND1	-0.2661	0.5125	1.0381
P23443	RPS6KB1	0.0627	0.7912	0.4835
[truncated: 2,948 more rows]
