# Supplementary material for: Quantitative Proteomics and Differential Protein Abundance Analysis after Depletion of Putative mRNA Receptors in the ER Membrane of Human Cells Identifies Novel Aspects of mRNA Targeting to the ER
Source: Molecules. 2021 Jun 11;26(12):3591. doi: 10.3390/molecules26123591 (PMC8230838; doi:10.3390/molecules26123591)
Supplement: Supplementary file 1 [file molecules-26-03591-s001.zip › Table S5_KTN1_full_lo.xlsx]

## Sheet: Sheet 1
Accession	Gene	Full protein name	log2 fold change	Subcellular location	SS or TMH	Number of TMD	Glycosylation sites	SP or TMH seq.	TMH position	AREs in 3´UTR
P35749	MYH11	Myosin-11	-4.09929	Melanosome		0	0			8
O14556	GAPDHS	Glyceraldehyde-3-phosphate dehydrogenase, testis-specific	-3.31948	Cytoplasm		0	0			0
Q8TDI8	TMC1	Transmembrane channel-like protein 1	-2.96406	Membrane	TMH	6	0	MVLFILTFSLIMLPEYLWGLP	200 - 220	0
Q9NUM4	TMEM106B	Transmembrane protein 106B	-2.60912	Membrane, Lysosome membrane, Late endosome membrane	TMH	1	5	YVMASVFVCLLLSGLAVFFLF	97 - 117	43
Q9UL42	PNMA2	Paraneoplastic antigen Ma2	-2.34588	Nucleus, Nucleolus		0	0			7
Q13393	PLD1	Phospholipase D1	-2.31115	Late endosome membrane, Golgi apparatus membrane, Endoplasmic reticulum membrane, Perinuclear region, Cytoplasm		0	0			8
O15530	PDPK1;PDPK2	3-phosphoinositide-dependent protein kinase 1	-2.2908	Focal adhesion, Cell junction, Cell membrane, Nucleus, Cytoplasm		0	0			10
Q14697-2	GANAB	Neutral alpha-glucosidase AB	-2.2425	Golgi apparatus, Endoplasmic reticulum, Melanosome	SP	0	1	MAAVAAVAARRRRSWASLVLAFLGVCLG		2
Q6Y1H2	PTPLB	Very-long-chain (3R)-3-hydroxyacyl-CoA dehydratase 2	-2.11263	Endoplasmic reticulum membrane	TMH	6	1	LVIYNVVMTAGWLVIAVGL	42 - 60	0
E7EUT4	GAPDH	Glyceraldehyde-3-phosphate dehydrogenase	-2.10959	Cytoskeleton, Cytoplasm, Perinuclear region, Nucleus, Membrane, Cytosol		0	0			0
P08572	COL4A2	Collagen alpha-2(IV) chain	-2.09619	Extracellular matrix, Secreted, Extracellular space, Basement membrane	SP	0	1	MGRDQRAVAGPALRRWLLLGTVTVG		1
Q86UP2	KTN1	Kinectin	-1.98821	Endoplasmic reticulum membrane	TMH	1	8	AYFIVLIPSIVITVIFLFFWLFM	7 - 29	0
P60604	UBE2G2	Ubiquitin-conjugating enzyme E2 G2	-1.96443			0	0			7
O95625	ZBTB11	Zinc finger and BTB domain-containing protein 11	-1.9042	Nucleus		0	0			9
Q08722	CD47	Leukocyte surface antigen CD47	-1.72221	Cell membrane	SP	5	6	MWPLVAALLLGSACCGSA		16
P52657	GTF2A2	Transcription initiation factor IIA subunit 2	-1.67172	Nucleus		0	0			1
Q14135	VGLL4	Transcription cofactor vestigial-like protein 4	-1.55277	Nucleus		0	0			3
P27449	ATP6V0C	V-type proton ATPase 16 kDa proteolipid subunit	-1.49811	Vacuole membrane	TMH	4	0	ASFFAVMGASAAMVFSALGAAYG	11 - 33	2
Q9NXS2	QPCTL	Glutaminyl-peptide cyclotransferase-like protein	-1.49092	Golgi apparatus membrane	TMH	1	0	LLPLLLALAVGSAFYTIWSGW	35 - 55	0
Q8N4A0	GALNT4;POC1B-GALNT4	Polypeptide N-acetylgalactosaminyltransferase 4	-1.43281	Golgi apparatus membrane	TMH	1	1	LLLAFLTVAYIFVELLVSTFHAS	13 - 35	19
Q969E8	TSR2	Pre-rRNA-processing protein TSR2 homolog	-1.32236			0	0			0
F8W543	NAP1L1		-1.25119							28
O75874	IDH1	Isocitrate dehydrogenase [NADP] cytoplasmic	-1.09564	Peroxisome, Cytoplasm		0	0			0
Q9UGJ1	TUBGCP4	Gamma-tubulin complex component 4	-1.03774	Centrosome, Microtubule organizing center, Cytoplasm, Cytoskeleton		0	0			9
Q9NYL2-2	ZAK	Mitogen-activated protein kinase kinase kinase MLT	-1.01399	Cytoplasm, Nucleus		0	0			0
O43805	SSNA1	Sjoegren syndrome nuclear autoantigen 1	-0.989291	Centrosome, Cytoplasm, Cytoskeleton, Microtubule organizing center, Nucleus		0	0			0
Q9BRQ0	PYGO2	Pygopus homolog 2	-0.98753	Nucleus		0	0			1
P42356	PI4KA	Phosphatidylinositol 4-kinase alpha	-0.975406	Cytoplasm, Cell membrane		0	0			1
Q12979	ABR	Active breakpoint cluster region-related protein	-0.929349			0	0			0
P29218	IMPA1	Inositol monophosphatase 1	-0.916325	Cytoplasm		0	0			6
Q8TAA5	GRPEL2	GrpE protein homolog 2, mitochondrial	-0.912726	Mitochondrion matrix		0	0			13
P55263	ADK	Adenosine kinase	-0.853675	Cytoplasm, Nucleus		0	0			7
P11171	EPB41	Protein 4.1	-0.82583	Nucleus, Cytoskeleton, Cytoplasm, Cell cortex		0	0			3
Q13153	PAK1	Serine/threonine-protein kinase PAK 1	-0.798974	Cell projection, Cytoplasm, Ruffle membrane, Cell membrane, Cell junction, Focal adhesion, Invadopodium		0	0			1
O95747	OXSR1	Serine/threonine-protein kinase OSR1	-0.734829	Cytoplasm		0	0			5
Q8NBF6	AVL9	Late secretory pathway protein AVL9 homolog	-0.734162	Membrane, Recycling endosome	TMH	1	0	LVGALMTVLSLFPGMIE	214 - 230	0
Q96EQ0	SGTB	Small glutamine-rich tetratricopeptide repeat-containing protein beta	-0.733829			0	0			17
Q07817	BCL2L1	Bcl-2-like protein 1	-0.705612	Cytoplasmic vesicle, Mitochondrion outer membrane, Secretory vesicle, Mitochondrion matrix, Microtubule organizing center, Cytoplasm, Mitochondrion inner membrane, Centrosome, Cytosol, Nucleus membrane, Synaptic vesicle membrane, Cytoskeleton	TMH	1	0	FNRWFLTGMTVAGVVLL	210 - 226	3
Q8N392	ARHGAP18	Rho GTPase-activating protein 18	-0.698106	Cytoplasm		0	0			4
Q01995	TAGLN	Transgelin	-0.675298	Cytoplasm		0	0			0
Q9NRZ9	HELLS	Lymphoid-specific helicase	-0.599453	Nucleus		0	0			2
Q9BZG8	DPH1	Diphthamide biosynthesis protein 1	-0.55261	Cytoplasm, Nucleus		0	0			0
O95758	PTBP3	Polypyrimidine tract-binding protein 3	-0.541308			0	0			17
P18206	VCL	Vinculin	-0.510406	Cytoskeleton, Cytoplasm, Cell membrane, Cell junction, Focal adhesion, Adherens junction		0	0			6
P14923	JUP	Junction plakoglobin	-0.486804	Membrane, Cytoskeleton, Cytoplasm, Adherens junction, Cell junction, Desmosome		0	1			0
