# Supplementary material for: Quantitative Proteomics and Differential Protein Abundance Analysis after Depletion of Putative mRNA Receptors in the ER Membrane of Human Cells Identifies Novel Aspects of mRNA Targeting to the ER
Source: Molecules. 2021 Jun 11;26(12):3591. doi: 10.3390/molecules26123591 (PMC8230838; doi:10.3390/molecules26123591)
Supplement: Supplementary file 1 [file molecules-26-03591-s001.zip › Table S6_KTN1_full_up.xlsx]

## Sheet: Sheet 1
Accession	Gene	Full protein name	log2 fold change	Subcellular location	SS or TMH	Number of TMD	Glycosylation sites	SP or TMH seq.	TMH position
P24043	LAMA2	Laminin subunit alpha-2	2.93958	Basement membrane, Extracellular space, Secreted, Extracellular matrix	SP	0	28	MPGAAGVLLLLLLSGGLGGVQA
P25815	S100P	Protein S100-P	1.64884	Nucleus, Microvillus membrane, Cytoplasm, Cell projection		0	0
O14684	PTGES	Prostaglandin E synthase	1.45852	Membrane	TMH	4	0	LPAFLLCSTLLVIKMYVVAIITGQVRLRK	13 - 41
Q92626	PXDN	Peroxidasin homolog	1.40482	Extracellular space, Secreted, Extracellular matrix	SP	0	9	MAKRSRGPGRRCLLALVLFCAWGTLA
Q9Y6N5	SQRDL	Sulfide:quinone oxidoreductase, mitochondrial	1.3668	Mitochondrion		0	0
Q9BZC7	ABCA2	ATP-binding cassette sub-family A member 2	1.30107	Lysosome membrane, Endosome membrane	TMH	14	25	PWVLAFEIFIPLVLFFILLGL	22 - 42
Q86SZ2	TRAPPC6B	Trafficking protein particle complex subunit 6B	1.22691	Endoplasmic reticulum, Golgi apparatus, cis-Golgi network		0	0
O95340	PAPSS2	Bifunctional 3'-phosphoadenosine 5'-phosphosulfate synthase 2	1.17148			0	0
Q9H1K1	ISCU	Iron-sulfur cluster assembly enzyme ISCU, mitochondrial	1.11801	Mitochondrion, Nucleus, Cytoplasm		0	0
Q03393	PTS	6-pyruvoyl tetrahydrobiopterin synthase	1.06771			0	0
Q9H871	RMND5A	Protein RMD5 homolog A	1.06114			0	0
Q9UBW8	COPS7A	COP9 signalosome complex subunit 7a	0.9483	Nucleus, Cytoplasm		0	0
P98194	ATP2C1	Calcium-transporting ATPase type 2C member 1	0.944492	Golgi apparatus membrane	TMH	10	0	LWKKYISQFKNPLIMLLLASA	71 - 91
Q5TAQ9	DCAF8	DDB1- and CUL4-associated factor 8	0.918086	Nucleus, Cytoplasm		0	0
O60504	SORBS3	Vinexin	0.908082	Cell junction, Cytoskeleton, Cytoplasm, Nucleus		0	0
Q16775	HAGH	Hydroxyacylglutathione hydrolase, mitochondrial	0.866271	Cytoplasm, Mitochondrion matrix		0	0
Q15437	SEC23B	Protein transport protein Sec23B	0.865279	Endoplasmic reticulum-Golgi intermediate compartment membrane, Endoplasmic reticulum membrane, Golgi apparatus membrane		0	0
P15291	B4GALT1	Beta-1,4-galactosyltransferase 1	0.860918	Golgi stack membrane, Cell surface, Filopodium, Cell projection, Secreted, Cell membrane, Golgi apparatus	TMH	1	1	LLVAVCALHLGVTLVYYLAG	25 - 44
Q6PD74	AAGAB	Alpha- and gamma-adaptin-binding protein p34	0.851619	Cytoplasm, Cytosol		0	0
Q9NVX7	KBTBD4	Kelch repeat and BTB domain-containing protein 4	0.777998			0	0
P62993	GRB2	Growth factor receptor-bound protein 2	0.667552	Cytoplasm, Nucleus, Endosome, Golgi apparatus		0	0
Q9P2E9	RRBP1	Ribosome-binding protein 1	0.647677	Endoplasmic reticulum membrane	TMH	1	0	TLGVVVFGGFMVVSAIGIFLV	8 - 28
Q9NXF7	DCAF16	DDB1- and CUL4-associated factor 16	0.619722			0	0
P07203	GPX1	Glutathione peroxidase 1	0.581502	Cytoplasm		0	0
Q5T8D3-3	ACBD5	Acyl-CoA-binding domain-containing protein 5	0.578337	Peroxisome membrane	TMH	1	0	GVLTFAIIWPFIAQWLVYLYY	506 - 526
