# Supplementary material for: Quantitative Proteomics and Differential Protein Abundance Analysis after Depletion of Putative mRNA Receptors in the ER Membrane of Human Cells Identifies Novel Aspects of mRNA Targeting to the ER
Source: Molecules. 2021 Jun 11;26(12):3591. doi: 10.3390/molecules26123591 (PMC8230838; doi:10.3390/molecules26123591)
Supplement: Supplementary file 1 [file molecules-26-03591-s001.zip › Table S7_ERj1_all.xlsx]

## Sheet: Sheet 1 - erj1_all_summary_2
ID	Gene name	Fold change	Neg. log10 p-value 1	Neg. log10 p-value 2
Q01831	XPC	0.296	2.9955	0.0471
Q16540	MRPL23	-0.0933	0.5836	0.122
P98194	ATP2C1	0.7721	0.9344	3.5557
O43493	TGOLN2	0.2246	1.4227	2.1427
Q9H0E3	SAP130	0.4299	1.0789	0.1712
Q9NWA0	MED9	-0.079	0.8474	0.2901
Q66PJ3	ARL6IP4	0.228	0.5379	1.7932
O60524	NEMF	-0.1686	0.9554	0.1647
O15020	SPTBN2	-0.102	0.3238	0.807
P62888	RPL30	0.2166	0.8294	0.721
O94804	STK10	-0.0941	0.2333	0.9723
Q5VZE5	NAA35	-0.3306	0.5115	0.3459
O43422	PRKRIR	-0.1946	0.0584	0.0313
Q9NPJ3	ACOT13	-0.3549	1.1579	0.8198
P55209	NAP1L1	-0.2017	1.1768	0.3271
O94760	DDAH1	-0.0455	1.9513	1.5492
Q86VS8	HOOK3	-0.1346	1.8204	0.4721
Q15397	KIAA0020	-0.2975	0.3847	1.8059
Q8NI08	NCOA7	-0.5004	1.2354	1.7008
Q9BZ95	WHSC1L1	-0.2669	0.3867	0.5469
Q86TX2	ACOT1	0.5966	3.121	0.9185
P13797	PLS3	-0.078	0.1916	0.376
A6NDU8	C5orf51	-0.0419	1.0519	0.552
Q9BVC5	C2orf49	-0.7533	1.8299	1.8711
Q16763	UBE2S	-0.0485	0.6626	0.7971
O95229	ZWINT	-0.1147	0.2747	0.2998
Q99848	EBNA1BP2	0.0537	1.2737	0.4135
P47813	EIF1AX;EIF1AY	-0.0163	0.2683	0.147
O95178	NDUFB2;WUGSC:H_DJ0726N20.gs.b	0.933	5.5955	1.8068
O60831	PRAF2	-0.0924	0.1806	0.3702
Q7L576	CYFIP1	-0.1616	0.2166	0.8915
Q96JC1	VPS39	0.3609	0.4663	1.5764
P04179	SOD2	0.0161	0.1583	0.0469
O14617	AP3D1	-0.0836	0.5123	0.1901
P29373	CRABP2	0.3043	0.7413	0.9386
P41221	WNT5A	0.5531	0.2157	0.2723
Q15427	SF3B4	-0.3455	2.2485	0.5875
Q7L7L0	HIST3H2A;HIST1H2AB;HIST1H2AD	-0.8755	1.6943	0.5501
Q96G03	PGM2	-0.4199	0.515	1.6202
K7ELL7	PRKCSH	-0.1648	1.7871	0.1029
Q9H0A8	COMMD4	-0.1917	0.1749	0.5432
Q9Y2W1	THRAP3	0.0253	0.0624	0.1095
O15173	PGRMC2	0.1127	0.2566	0.8232
P78406	RAE1	0.2327	2.0859	0.2608
P20226	TBP	0.0465	0.0193	0.2746
Q8WXI9	GATAD2B	0.2606	1.0746	0.7195
B1APN9	PPFIA4	0.4811	1.9992	1.7961
Q09161	NCBP1	-0.4027	1.8887	1.6592
Q86XP3	DDX42	-0.2789	1.1246	1.1404
P31689	DNAJA1	-0.1218	0.6706	0.2538
P34932	HSPA4	-0.0295	0.2229	0.325
O75131	CPNE3	-0.2624	0.423	1.164
Q9NR46	SH3GLB2	-0.0084	0.2105	0.1424
Q5SRE5	NUP188	0.1987	0.8676	0.5296
Q9Y2Q9	MRPS28	-0.249	0.4828	0.8424
P02792	FTL	0.0609	0.3976	0.0006
P84085	ARF5	-0.289	0.0592	0.9366
Q7Z7F0	KIAA0907	-1.0942	1.3189	2.4562
Q5T8V1	C9orf41	-1.0966	0.542	1.6558
P30153	PPP2R1A	-0.0839	0.9641	0.0205
Q15286	RAB35	0.5166	0.5226	1.4423
Q8NI36	WDR36	0.1875	2.0122	0.1592
P52657	GTF2A2	-2.4737	12.808	9.5726
O00712	NFIB	-1.1198	0.517	6.1839
Q5VU66	TPM3	0.472	0.8552	0.8651
Q9Y4E6	WDR7	-0.8513	8.7197	0.9986
Q96QK1	VPS35	0.0013	0.0614	0.04
P31942	HNRNPH3	0.5689	3.0317	1.6411
P28838	LAP3	-0.1756	0.7312	0.7346
Q9H8S9	MOB1A;MOB1B	0.4924	1.3747	1.6282
Q5T8I3	FAM102B	0.3287	0.6761	0.6922
Q53GQ0	HSD17B12	-0.1376	2.1574	0.075
Q8NBT2	SPC24	0.2953	1.1941	0.1819
Q9BRF8	CPPED1	0.0302	0.4059	0.2404
Q96EL2	MRPS24	1.1897	2.8327	3.8548
O43516	WIPF1	0.397	0.8954	0.869
Q6NYC8	PPP1R18	0.116	0.6924	1.1018
O95292	VAPB	0.1976	0.0527	1.0547
Q96RL7	VPS13A	0.0423	0.0673	0.1308
P06746	POLB	0.1376	0.6943	0.0502
Q01081	U2AF1	-0.2874	0.2098	1.3557
O94916	NFAT5	0.4654	0.9179	0.7295
P19525	EIF2AK2	-0.0423	0.2449	0.4864
Q9Y5Z4	HEBP2	-0.31	0.0595	0.5907
P25440	BRD2	-0.4024	1.1706	0.752
Q9Y5P6	GMPPB	-0.1693	0.84	0.2362
Q9NZD8	SPG21	-1.0334	2.1822	1.2677
P40937	RFC5	-0.1456	0.4499	1.3453
Q00610	CLTC	0.1372	0.5754	0.5272
Q9BT17	MTG1	1.2853	1.865	2.2949
Q49AR2	C5orf22	0.3879	0.7294	0.7586
Q9UEY8	ADD3	-0.5271	1.1503	1.5386
O14828	SCAMP3	0.2553	0.5175	1.1163
P50454	SERPINH1	-0.1425	1.545	0.0221
Q9Y315	DERA	-0.3971	0.6396	0.9835
Q9BXK5	BCL2L13	-0.0988	0.7077	0.0587
Q14151	SAFB2	0.346	0.8342	0.9128
Q96T17-2	MAP7D2	0.137	0.0141	0.3282
J3QRU1	YES1	-0.03	0.0659	0.0788
Q9BYJ9	YTHDF1	0.0313	0.1475	0.0944
Q15007	WTAP	0.0138	0.0745	0.2462
P16152	CBR1	0.0221	0.4224	0.1551
P61081	UBE2M	0.3265	2.3658	0.9144
P68400	CSNK2A1;CSNK2A3	-0.1422	0.0651	1.0423
O95602	POLR1A	0.0018	0.3779	0.3185
O75044	SRGAP2	0.2933	1.0625	0.0997
Q5JVF3	PCID2	-0.2702	0.1042	1.5878
O60884	DNAJA2	0.4964	1.4221	2.237
P51809	VAMP7	0.0691	0.0844	0.2061
Q92572	AP3S1	0.3103	0.9515	0.1649
O75521	ECI2	0.1139	0.2568	0.884
P62891	RPL39;RPL39P5	0.8991	1.3372	1.3947
Q9NZJ7	MTCH1	-0.0523	0.6292	0.5243
Q9H8H2	DDX31	-0.6546	3.1218	1.7373
O75251	NDUFS7	-0.4298	0.4293	1.1898
P52564	MAP2K6	0.4626	0.3345	3.6383
P48729	CSNK1A1	-0.0582	0.4303	0.1021
O00233	PSMD9	0.2838	0.2307	1.6206
P55884	EIF3B	-0.2582	0.7355	1.2918
Q9Y6E2	BZW2	0.0965	0.5313	0.095
Q9UER7	DAXX	-0.2376	1.0528	0.4251
Q86Y56	HEATR2	0.307	2.4977	0.4078
Q9NUQ9	FAM49B	0.4135	3.0275	1.3002
Q9UBV8	PEF1	0.3827	1.4017	0.4974
Q9NVJ2	ARL8B	-0.3489	0.4732	1.263
Q9HAU0	PLEKHA5	0.2278	0.1655	1.3612
Q99873-4	PRMT1	-0.0408	0.2291	0.3856
Q9NQX3	GPHN	0.0607	0.4185	0.0702
O95999	BCL10	0.1741	0.6768	0.2402
O43865	AHCYL1	0.3889	0.2777	2.4237
P50542-2	PEX5	-0.0949	0.8491	0.3529
P49591	SARS	-0.0031	0.0229	0.0469
P42684	ABL2	-0.5044	1.4601	0.4741
Q9BTC0	DIDO1	-0.3926	0.7079	1.7066
P20042	EIF2S2	0.0609	0.5923	0.0442
Q86XL3	ANKLE2	0.2375	0.2476	0.9782
Q5HYK3	COQ5	0.2519	1.3449	0.5835
Q13459	MYO9B	0.3657	0.4527	0.7342
P78347	GTF2I	-0.1146	1.4745	0.0912
Q8N4H5	TOMM5	0.2258	0.445	0.7561
Q9UNS2	COPS3	-0.2757	2.7836	0.524
Q8WZA0	LZIC	0.1511	0.9342	0.0903
O14530	TXNDC9	0.3169	0.3914	1.827
Q5RHS7	S100A2	1.3914	0.0021	0.4347
Q8WUX1	SLC38A5	-0.1427	0.3068	0.408
Q04637	EIF4G1	0.0471	0.3035	0.5075
Q86VV8	RTTN	-0.1673	0.6104	0.0211
Q9Y3B2	EXOSC1	-0.1514	0.5045	0.9708
P39019	RPS19	-0.1353	0.4103	0.6153
Q9NNW7	TXNRD2	-0.5603	2.1804	0.8488
P08243	ASNS	-0.0658	1.1705	1.162
P53350	PLK1	-0.0488	0.4983	0.5249
A8MUA9	SUMO3;SUMO2	0.7395	2.7055	2.6946
Q12933	TRAF2	-0.1638	0.3225	0.1586
Q96S19	C16orf13	0.19	1.499	0.3024
P20073	ANXA7	-0.1273	0.1708	0.7106
Q86WQ0	NR2C2AP	0.3506	1.1158	0.6684
O43324	EEF1E1;EEF1E1-BLOC1S5	0.1557	0.7656	0.4966
J3KSL8	TRAPPC8	0.0319	0.2137	0.6307
Q14C86	GAPVD1	0.2456	0.8773	0.695
Q15102	PAFAH1B3	0.0947	0.1876	0.2812
Q9BVC3	DSCC1	-0.0597	0.4108	0.0111
Q6UX04	CWC27	-0.4786	1.1698	1.4128
P53396-2	ACLY	-1.5236	5.3198	0.1629
Q15276	RABEP1	0.927	3.3569	3.1987
Q6PCB5	RSBN1L	0.2397	0.0848	0.3467
P78527	PRKDC	-0.0807	0.6915	0.1242
Q9NP79	VTA1	0.2964	2.3038	0.6467
O14980	XPO1	-0.4292	1.4884	2.2737
Q9UJ72	ANXA10	0.1909	0.5127	0.3791
Q96GE9-2	TMEM261	0.0294	0.0339	0.2636
Q9Y2H6	FNDC3A	0.1265	0.8283	1.4188
Q969Q0	RPL36AL	-0.0999	0.0442	0.5072
Q9UNN5	FAF1	-0.5072	0.0342	2.9459
P31327	CPS1	-0.1169	1.1259	0.0693
Q6P087	RPUSD3	-0.2319	0.4425	0.12
Q96GA3	LTV1	-0.0877	0.4804	0.1828
Q9Y291	MRPS33	1.3079	2.3354	3.001
Q92696	RABGGTA	0.1749	0.736	0.227
Q9NZ53	PODXL2	0.074	0.5575	0.0935
Q5BJD5	TMEM41B	1.1941	1.3573	3.0078
Q8TF42	UBASH3B	0.9153	1.0748	1.9249
P17174	GOT1	0.1159	0.7081	0.2524
F5H1X8	LRBA	0.0734	0.9181	1.2978
P60059	SEC61G	-0.486	2.985	0.5592
O00399	DCTN6	-0.0464	0.3141	0.2792
Q14694	USP10	-0.2249	0.8678	0.6864
Q9UHB9	SRP68	0.1366	0.6623	0.2256
O14964	HGS	0.0511	0.2177	0.4075
P11498	PC	0.0243	0.0318	0.1045
Q9Y448	KNSTRN	0.1871	0.103	0.3679
J3KN66	TOR1AIP1	0.5155	0.4268	3.0086
O95059	RPP14	0.1884	1.4949	0.0847
Q96GQ5	C16orf58	-0.5943	0.9413	2.0337
Q9UK41	VPS28	-0.3505	1.2921	1.135
Q9H0L4	CSTF2T	0.2477	0.7456	0.1432
P30154	PPP2R1B	-0.1667	0.8766	0.0849
P00387	CYB5R3	-0.162	0.9143	0.3409
Q96SK2	TMEM209	0.486	1.0401	0.7752
Q7Z5J4	RAI1	0.4781	2.7166	0.4024
Q9UHN1	POLG2	-0.6845	0.4788	2.0019
Q9NWY4	C4orf27	-0.0741	0.2114	0.5788
Q8NBP0	TTC13	-0.3463	1.3741	0.4205
Q8TDY2	RB1CC1	0.7838	1.5386	1.5328
Q5BKZ1	ZNF326	-0.2605	0.2844	1.9711
O15355	PPM1G	0.1844	0.555	0.621
P30405	PPIF	0.0973	0.3768	0.7579
Q9BZG1	RAB34	0.5432	0.9586	1.1564
Q9P2E9	RRBP1	0.5224	1.5772	2.7794
Q9BZI7	UPF3B	-0.3844	1.1137	1.0961
O15143	ARPC1B	-0.3529	1.1509	3.7481
Q02241	KIF23	0.1837	0.6981	0.3125
P08621	SNRNP70	0.5969	3.5986	1.6506
P46060	RANGAP1	-0.1044	0.7534	0.166
Q9Y2Q5	LAMTOR2	-0.2222	0.2198	0.564
P41247	PNPLA4	-0.1631	1.1354	0.2574
P17213	BPI	-0.3931	0.717	0.769
Q16740	CLPP	0.0954	0.7103	0.0552
P17096	HMGA1	0.0841	0.0388	0.4803
P53004	BLVRA	-0.0294	0.3118	0.3248
P55265	ADAR	-0.1196	0.4631	0.5472
Q9H3P7	ACBD3	0.5343	1.1255	0.9144
P51398	DAP3	-0.2981	1.3711	0.9287
Q9UKK3	PARP4	-0.4378	1.1635	1.91
P60002	ELOF1	0.6921	1.2215	0.7569
Q9NRR5	UBQLN4;UBQLN1	0.4128	0.4804	1.1389
O95983	MBD3	-0.6633	1.4909	1.7065
P52594	AGFG1	-0.0515	0.1162	0.1401
P12270	TPR	-0.0386	0.1801	0.0764
P24386	CHM	0.2944	0.0349	1.2988
Q9BWM7	SFXN3	0.1552	0.9615	0.0155
Q96FV9	THOC1	0.0572	0.8726	0.2076
Q00059	TFAM	0.2342	0.2203	1.0147
Q9UHL4	DPP7	1.2419	1.6701	1.5767
Q9H4L7	SMARCAD1	-0.8579	3.3134	4.1135
Q969Y2	GTPBP3	0.7386	2.2859	1.3739
Q70UQ0-4	IKBIP	-0.1709	0.8005	0.2822
Q9Y4A5	TRRAP	-0.0394	0.343	0.0907
Q9H2U2	PPA2	0.107	0.643	0.1937
Q92540	SMG7	0.8599	0.1913	2.3131
O75934	BCAS2	-0.0257	0.0655	0.0641
Q9BRA2	TXNDC17	-0.2225	0.4904	0.9823
Q9BVC6	TMEM109	0.4341	0.5315	1.3927
P16989	YBX3	0.013	0.3124	0.3284
Q13586	STIM1	-0.017	0.0045	0.1213
Q15054	POLD3	-0.0541	0.1244	0.2317
Q9Y2D4	EXOC6B	-0.6291	1.462	2.2662
Q8NI35	INADL	-0.2403	1.127	0.1949
Q9Y5A9	YTHDF2	0.0033	0.0236	0.0935
P29966	MARCKS	-0.1658	0.6103	0.4693
Q9H944	MED20	-0.388	2.181	0.7706
P56192	MARS	-0.1768	0.7647	0.6525
P15954	COX7C	-1.2986	0.3845	2.0337
Q96RE7	NACC1	-0.0003	0.1492	0.1326
Q9BZX2	UCK2	0.0779	0.3485	0.147
Q6ZRP7	QSOX2	0.3145	1.6265	1.1536
Q9UG63	ABCF2	-0.0519	0.18	0.1134
Q92522	H1FX	-0.3397	0.106	1.6328
O60684	KPNA6	-0.0025	0.3388	0.2172
Q8N4T8	CBR4	0.2394	1.8653	0.3638
Q96I24	FUBP3	0.1292	0.2914	0.4893
Q9UBI6	GNG12	0.4703	1.2507	1.1862
Q86UP2-3	KTN1	-1.5088	1.0241	2.9888
P56589	PEX3	-0.157	0.2248	0.5089
Q14839	CHD4	-0.07	0.1507	0.3281
O76094-2	SRP72	0.1708	0.9143	0.0053
O00151	PDLIM1	-0.0226	0.2711	0.3673
Q6L8Q7	PDE12	-0.084	1.4831	1.0179
P82909	MRPS36	0.3271	0.5432	1.5882
Q13415	ORC1	0.5212	0.8455	1.3809
Q58FF8	HSP90AB2P	0.0531	0.2987	0.1388
P25325	MPST	-0.1759	3.1425	0.6322
P62314	SNRPD1	-0.118	0.6008	1.4978
Q6P2Q9	PRPF8	-0.1237	0.4463	0.6
P16035	TIMP2	1.0406	1.0517	4.1168
Q15758	SLC1A5	-0.0629	0.7066	0.8691
Q96FC9-4	DDX11;DDX12P;DDX11L8	0.336	0.6836	0.1638
P28066	PSMA5	-0.1431	0.6092	0.2784
Q8N4V1	MMGT1	-0.1878	0.1122	0.7067
Q7L1Q6	BZW1	-0.3509	0.5693	2.3354
P49643	PRIM2	-0.099	0.4557	0.146
P62854	RPS26;RPS26P11	-0.1515	1.2686	0.2319
Q5JPE7	NOMO2;NOMO3	0.379	0.1961	1.1028
O43663	PRC1	0.5044	1.426	0.4903
P52434	POLR2H	0.8679	1.5119	2.2773
Q9BVJ6	UTP14A	-0.4276	1.1266	2.1411
P51790	CLCN3	0.709	1.7641	0.4617
Q9NRF9	POLE3	0.2269	1.8473	0.5286
P11171	EPB41	0.1183	0.1628	0.6748
Q13724	MOGS	-0.2611	1.1906	0.5998
Q96ND0	FAM210A	-0.5129	0.8635	0.4687
Q9BT73	PSMG3	-0.0936	0.8164	0.2155
P22314	UBA1	-0.0436	0.0993	0.1864
Q13425	SNTB2	-0.1017	0.754	0.1157
O95391	SLU7	0.3467	0.3308	1.0671
O00487	PSMD14	-0.02	0.5495	0.4029
O00267	SUPT5H	-0.0975	0.2951	0.1495
P17028	ZNF24	0.1739	0.2973	0.1218
Q4G0N4	NADK2	-0.0621	0.1745	0.3762
Q12986	NFX1	0.2723	0.8564	0.3581
Q9BRQ0	PYGO2	0.3186	0.3721	0.84
Q8N983	MRPL43	0.0408	0.5965	0.244
Q9BW92	TARS2	0.2407	0.2205	0.9548
O15392	BIRC5	-0.5149	1.2739	2.8286
O96028	WHSC1	-0.1779	0.3641	0.6214
P82930	MRPS34	0.5223	2.5479	2.3804
P46087	NOP2	-0.0181	0.3459	0.3148
P82914	MRPS15	0.4661	0.1382	1.9066
P56182	RRP1	0.0202	0.6419	0.2555
Q9BV38	WDR18	-0.3155	0.3093	1.4257
Q53EL6	PDCD4	-0.5972	1.8106	4.0204
P57772	EEFSEC	0.2013	0.232	0.9348
Q567U6	CCDC93	0.0424	0.7357	0.229
Q93079	HIST1H2BH;HIST1H2BM;HIST1H2BN;HIST2H2BF;HIST1H2BD;HIST1H2BK;HIST1H2BC;H2BFS	-0.397	1.0519	1.8337
P26447	S100A4	-0.1567	0.7373	0.1311
Q9NQ55	PPAN	-0.3022	0.227	2.1776
O60499	STX10	-0.1997	0.6372	0.165
Q96P16	RPRD1A	-0.6802	1.123	3.484
Q9H0W9	C11orf54	-0.3428	1.0788	1.748
Q8N2M8	CLASRP	-0.2594	4.2996	4.4674
Q86TS9	MRPL52	0.0047	0.0147	0.0938
P28715	ERCC5	-0.1127	0.5031	0.0711
O95340	PAPSS2	0.8107	0.9409	2.5484
Q96PK6	RBM14	0.3809	1.4951	1.468
Q9UN86	G3BP2	-0.0358	0.8916	0.2105
P18846	ATF1;CREM	1.1571	2.1013	1.7041
Q14676	1	-0.1919	0.2308	1.0028
P10909	CLU	0.2521	1.9327	0.0443
P11233	RALA	0.0217	0.3778	0.462
O95453	PARN	0.0017	0.5152	0.1591
Q5JPH6	EARS2	-0.3886	1.1519	0.8869
Q92804	TAF15	-0.0948	0.3513	0.1108
Q96HE7	ERO1L	-0.3272	0.6106	1.2791
Q9BRJ7	NUDT16L1	0.0843	0.2321	0.4581
Q7L2E3-2	DHX30	-0.0534	0.1667	0.2053
Q9H0S4	DDX47	-0.5329	0.8219	2.8557
Q9NPA3	MID1IP1	0.0407	0.7846	0.3905
O75534	CSDE1	0.0805	0.5694	0.1657
P53396	ACLY	-0.0429	1.3305	0.4013
P62072	TIMM10	0.1968	0.4497	0.0668
O15400	STX7	-0.0213	0.0557	0.1612
P61513	RPL37A	0.458	1.2441	1.1764
P98175	RBM10	0.1022	2.3749	0.3861
Q9Y3P9	RABGAP1	0.2331	0.662	0.5613
P0C0S5	H2AFZ;H2AFV	-0.3242	1.2001	0.3822
Q14966	ZNF638	-0.0572	0.4653	0.1522
P61289	PSME3	-0.2123	0.7032	0.6855
Q9NZ32	ACTR10	-0.7836	2.1089	2.2397
P30876	POLR2B	-0.3221	0.8712	1.451
Q08AM6	VAC14	-0.3306	0.4251	2.6662
P48382	RFX5	-0.3769	0.0257	1.0403
O15212	PFDN6	-0.4012	0.1335	3.1382
Q9H8G2	CAAP1	0.1779	0.1556	0.6453
Q9Y3D5	MRPS18C	-0.5624	1.1437	0.3422
Q13561	DCTN2	-0.0828	0.6079	0.1508
Q15126	PMVK	0.2758	0.7853	0.5907
Q8NBF2	NHLRC2	-0.0544	0.566	0.0931
Q9NRY2	INIP	0.4223	3.9316	1.1538
Q14019	COTL1	0.211	1.6334	0.1982
P62304	SNRPE	0.3798	1.5943	0.6209
P54819	AK2	-0.1545	0.8925	0.414
P22570	FDXR	-0.6884	1.8176	1.281
Q7L5N7	LPCAT2	0.3286	0.6762	0.7948
Q969F9	HPS3	-0.1522	0.0806	0.3289
Q9GZY8-2	MFF	0.2965	1.4981	0.4402
P14324	FDPS	0.0916	0.1132	0.3272
Q96T58	SPEN	-0.0545	0.1741	0.2569
Q96EB1	ELP4	-0.0818	0.3337	0.2427
Q6PML9	SLC30A9	-0.9062	5.3074	0.1195
Q96T51	RUFY1	-0.0735	0.1397	0.4388
Q9NVD7	PARVA	0.0973	0.2235	0.7665
Q9GZR7	DDX24	-0.2205	0.4087	0.6893
Q13506	NAB1	-0.1691	0.963	0.0008
Q86VX2	COMMD7	-0.2439	0.4728	0.6548
Q4J6C6	PREPL	0.0755	1.1507	0.1796
Q96D53	ADCK4	-0.7771	0.5475	2.6426
O60547	GMDS	-0.119	0.4907	0.9256
Q9H9A5	CNOT10	-0.306	1.375	0.4218
Q13573	SNW1	-0.0831	0.0833	0.3166
P13073	COX4I1	0.1014	0.3409	0.0626
P46199	MTIF2	-0.011	0.2741	0.06
Q15172	PPP2R5A	0.7952	1.2314	0.0105
Q9GZN1	ACTR6	-0.3523	1.6114	0.0464
Q8NHH9	ATL2	0.0476	0.0464	0.1321
Q9NP61	ARFGAP3	-0.2636	0.2477	1.0336
P23396	RPS3	-0.0038	0.2057	0.1925
P57076	C21orf59	0.0296	0.8257	0.3133
P35914	HMGCL	-0.4757	2.0635	1.1333
O75486	SUPT3H	-0.0854	0.0712	0.0631
Q9Y508	RNF114	0.8305	2.0054	2.5774
P23634	ATP2B4	0.1603	0.2592	0.5163
Q7L311	ARMCX2	0.2971	0.3608	0.4656
Q32P41	TRMT5	-0.3381	0.2248	2.0746
Q5BJH7	YIF1B	-0.7383	1.5433	2.8093
Q13242	SRSF9	0.2871	2.3693	0.3217
Q92990	GLMN	-0.4565	1.1672	1.4455
P63010	AP2B1	0.0604	0.1039	0.3005
O60244	MED14	0.0409	0.2329	0.4271
Q14697	GANAB	0.1845	1.2145	0.3186
Q6PJT7	ZC3H14	-0.9041	6.8063	0.6706
P62328	TMSB4X;TMSB4XP4	0.0805	0.7753	1.0428
P25098	ADRBK1	-0.7283	1.5538	2.7236
Q9Y333	2	-0.4738	1.4941	2.1166
Q5SNT2	TMEM201	-0.0668	0.7311	0.3138
P56962	STX17	0.244	0.0649	0.6726
P46782	RPS5	0.545	2.014	2.7325
P16615	ATP2A2	0.1015	0.2659	0.475
Q9NXH9	TRMT1;SEMA4B	0.2752	0.945	0.3635
Q8IVH2	FOXP4	0.8387	1.4327	0.634
P78537	BLOC1S1	-0.3292	0.5054	1.0669
Q96QT4	TRPM7	0.6694	1.5272	1.5823
Q8N726	CDKN2A	2.0131	4.8838	3.5408
Q9UHR5	SAP30BP	0.1665	0.5552	0.5437
Q15125	EBP	0.897	0.482	3.2227
O14979-3	HNRNPDL	-0.2546	1.109	0.7136
P18621	RPL17	-0.0318	0.501	0.6249
P49848	TAF6	-0.0058	0.5515	0.3853
O60232	SSSCA1	0.1369	0.9909	0.3695
Q9UBE0	SAE1	-0.0678	0.9374	0.1753
Q9BQ67	GRWD1	-0.1136	0.1755	0.3388
Q9H4G4	GLIPR2	0.1296	0.1501	0.9416
Q13601	KRR1	0.1734	0.6715	0.051
Q6NZI2	PTRF	0.4034	0.3896	2.7623
P51608-2	MECP2	0.4197	0.3897	1.887
Q9NT62	ATG3	-0.4914	1.8088	1.4891
Q16698	DECR1	-0.1159	0.7456	0.2999
P36551	CPOX	-0.0357	0.55	0.592
Q13162	PRDX4	0.1205	0.7143	0.2098
Q9H5N1	RABEP2	0.7489	0.5463	2.7821
P16278	GLB1	-0.3958	2.2624	0.6759
Q9NZL9	MAT2B	-0.4788	1.7241	2.6123
Q96EQ0	SGTB	-0.0328	0.2029	0.0084
P41223	BUD31	-0.1974	0.0917	1.0427
P48047	ATP5O	0.5674	2.9097	1.3328
P07737	PFN1	-0.0671	0.3946	0.183
P56270-2	MAZ	0.1407	1.1625	0.5798
Q5JSH3	WDR44	-0.19	0.0516	1.3249
Q14118	DAG1	-0.0585	2.1025	1.1004
Q08499	PDE4D;DPYSL3	0.2951	2.3858	0.3319
Q13158	FADD	-0.1626	0.1634	0.6584
P54886	ALDH18A1	0.0061	0.8586	0.4651
O75976	CPD	-0.3625	0.6753	1.448
P62333	PSMC6	0.0943	0.8369	0.0341
P07992	ERCC1	-0.6541	2.054	0.6537
O75608	LYPLA1	-0.219	0.8822	0.8338
P23193	TCEA1	-0.1222	0.6095	0.2133
P49721	PSMB2	0.188	0.2712	0.6336
Q9NUI1	DECR2	0.6574	1.1816	0.8436
Q15121	PEA15	0.7907	0.3096	2.6011
Q96JJ3	ELMO2	-0.2416	2.285	0.0593
Q93074-2	MED12	0.0018	0.0363	0.0274
Q96DV4	MRPL38	0.6037	1.5686	1.8889
Q9NYV6	RRN3	0.1746	0.1961	0.6113
Q9P260	KIAA1468	-0.1234	0.2875	0.244
O75396	SEC22B	-0.234	0.9953	0.5727
Q08170	SRSF4	0.2384	0.7508	0.3589
Q9H900	ZWILCH	-0.0011	0.3024	0.151
Q96EN8	MOCOS	-0.2367	1.2483	0.1478
Q9Y6G3	MRPL42	-0.2631	0.4423	0.3429
Q6ZMI0	PPP1R21	-0.2102	0.05	1.062
O95831	AIFM1	-0.0513	0.4099	0.0249
Q58FF6	HSP90AB4P	-1.8536	7.6547	2.1953
P05186	ALPL	-0.3124	1.334	0.3855
Q5T8P6	RBM26	-0.1299	0.1075	0.9562
Q8TEX9	IPO4	0.0724	1.2081	0.36
Q07866	KLC1	-0.1987	0.3835	0.7247
Q9Y617	PSAT1	-0.1452	0.6145	1.6175
P04632	CAPNS1	-0.1976	0.1725	1.521
Q13620-1	CUL4B	0.0204	0.1931	0.201
Q9UKF7	PITPNC1	0.4372	0.9281	1.5263
P00533	EGFR	0.0741	0.0531	0.4056
O96013	PAK4;NRBP2	0.2603	0.9185	0.5767
Q9UHB6	LIMA1;TRMT1	1.5702	3.3433	5.4677
Q9HC21	SLC25A19	-0.4464	0.823	0.9913
Q9BXW9	FANCD2	0.2773	1.4839	0.3035
Q9BQS8	FYCO1	-0.29	0.8102	0.2883
Q658P3	STEAP3	0.1445	0.6052	0.0165
Q8NF64	ZMIZ2;ZMIZ1	0.4411	1.8997	0.3562
P34741	SDC2	0.906	1.2362	2.8793
Q6P2C8	MED27	-0.0498	0.1248	0.2542
Q9UGY1	NOL12	-0.4511	1.9243	0.8063
P18887	XRCC1;FOXH1	-0.1178	0.2003	0.5416
P42695	NCAPD3	-0.4266	0.9038	1.7091
Q14160	SCRIB	0.0396	0.3198	0.003
Q8IV08	PLD3	-0.0849	0.7512	0.3121
Q13795	ARFRP1	-0.0122	0.5743	0.2078
O75150	RNF40	0.1486	0.0287	0.937
Q6P1X5	TAF2	0.1169	0.414	0.1876
Q13595	TRA2A	0.8502	0.6179	2.0686
K7EJH8	ACTN4	0.2335	1.954	0.6877
P20645	M6PR	-0.1291	0.4126	0.6888
P11940	PABPC1;PABPC3	-0.104	0.1496	0.5623
O95361	TRIM16	0.1051	0.4967	0.0091
Q9UJW0	DCTN4	-0.1139	0.155	0.202
O75475	PSIP1	-0.0495	0.0657	0.3367
Q7Z4G4	TRMT11	-0.6653	0.2528	3.2571
P10301	RRAS	-0.0743	0.0453	0.1848
Q05639	EEF1A2	0.0457	0.139	0.3836
Q93034	CUL5	-0.3591	1.0525	0.1454
Q02040	AKAP17A	-0.1164	0.0146	0.6383
Q9NXF1	TEX10	-0.2384	0.962	0.6925
P17931	LGALS3	0.4963	2.283	1.2986
Q96EK9	KTI12	0.2628	1.1896	0.1123
P10155	TROVE2	0.074	0.2872	0.2298
P46108	CRK	0.1311	0.3849	1.1723
M0QXA7	WIZ	-0.6188	1.8395	2.4154
Q6MZW2	FSTL4	-0.0839	1.1886	0.7389
O14950	MYL12B	0.21	0.9048	0.6766
P62877	RBX1	0.048	0.3128	0.3193
O60218	AKR1B10;AKR1B15	0.1768	0.2468	1.2898
Q5T1V6	DDX59	-0.7263	1.2799	1.5914
O75792	RNASEH2A	-0.0713	1.0903	1.1981
Q9H3K6	BOLA2	0.2077	2.1371	0.1071
Q9C0B1	FTO	-0.0927	0.1379	0.3958
Q587I9	SFT2D3	-0.9447	0.9491	1.6781
Q9P013	CWC15	0.1685	1.1207	0.133
P52895	AKR1C2	-0.2704	0.0204	1.6293
Q9NYB0	TERF2IP	-0.61	1.8211	0.5975
Q8N5M9	JAGN1	-0.2771	0.9441	0.0061
Q13868	EXOSC2	-0.2009	0.6863	2.8065
P62306	SNRPF	0.1578	1.1795	0.0578
P82912	MRPS11	-0.0399	0.4035	0.1853
P30049	ATP5D	1.3788	4.7584	5.5807
Q92599	SEPT8	0.2146	0.8153	0.009
Q96RT1	ERBB2IP	0.0037	0.3157	0.0281
Q8N9N2-2	ASCC1	-0.1023	0.0535	0.3148
Q9UPY3	DICER1	-0.9783	1.2477	2.4965
Q02218	OGDH	0.2623	0.9852	1.1789
Q9UKV8	AGO2	0.3411	0.6365	0.6475
Q9H5Q4	TFB2M	-0.308	2.1618	0.5794
Q96GM8	TOE1	0.0258	0.5907	0.127
Q86WX3	RPS19BP1	-0.0226	0.0349	0.1562
O43264	ZW10	0.0576	0.1621	0.2908
O75367	H2AFY	-0.1951	0.5037	0.8214
Q9NRA8	EIF4ENIF1	0.3292	0.4431	1.3407
Q6PK04	CCDC137	-0.2996	2.332	0.1907
Q69YN2	CWF19L1	-0.4553	1.0215	0.8185
P18077	RPL35A	0.693	2.2609	3.5797
P37837	TALDO1	-0.0247	0.3311	0.063
P07814	EPRS	-0.2309	0.5372	1.2337
Q86YD1	PTOV1;MED25	-1.8652	0.4524	0.274
Q14318-2	FKBP8	0.5778	1.6486	2.5846
Q8WVC0	LEO1	0.0165	0.6331	0.2594
Q92922	SMARCC1	-0.2842	0.9745	1.193
Q6ULP2	AFTPH	-0.1231	0.8209	1.2671
O75884	RBBP9	0.7628	0.693	2.8177
O95299	NDUFA10	0.2056	0.8557	0.4122
Q5QPA5	MRPS18A	-0.6015	1.8344	0.583
Q9NUU7	DDX19A	-0.122	1.2983	0.0704
Q14108	SCARB2	0.124	0.3776	0.3755
C9J2X1		0.4212	0.8866	0.3946
B2RCS5	ACTN2	0.2843	0.2759	0.1237
Q9BXS5	AP1M1	0.1157	0.0483	0.6332
P62310	3	0.4149	1.9212	0.4849
Q14249	ENDOG	-0.1966	0.0662	0.1861
Q16881	TXNRD1;GML	0.1366	0.7737	0.2669
P19474	TRIM21	0.6382	0.0406	1.8922
Q9BYG3	NIFK	-0.0218	0.1401	0.2008
Q9NX70	MED29	0.2424	1.1131	0.0002
Q6P1L8	MRPL14	0.2443	0.5098	0.8178
O75694	NUP155	-0.0126	0.194	0.0604
Q01629	IFITM2;IFITM1	-0.0602	1.2292	1.3034
P55795	HNRNPH2	-0.3499	0.5464	0.5326
Q9HAV4	XPO5	-0.2173	1.741	0.4366
E7ETB3	DNPEP	0.2199	0.9748	0.0088
Q13616	CUL1	-0.1942	0.0182	1.101
A0PJW6	TMEM223	0.1522	0.6506	0.0453
Q8NCN4	RNF169	-0.2768	0.4437	1.1766
Q16695	HIST3H3;H3F3B	-6.375	12.0599	8.9994
C9J2U4	TAMM41	0.3586	1.5993	0.2514
Q8IV48	ERI1	-0.2255	0.1204	0.6067
P61019	RAB2A	0.157	0.9028	0.2885
P23434	GCSH	-0.6346	2.0926	1.4383
P51149	RAB7A	0.0096	0.3995	0.3732
Q8NFQ8	TOR1AIP2	0.7424	1.312	2.5754
Q9BZY9	TRIM31	-0.6972	3.1322	0.9987
Q14527	HLTF	-0.0823	0.6073	0.6583
Q06124	PTPN11	-0.0326	0.3543	0.0981
P29992	GNA11	-0.1659	0.6228	2.0558
Q14790	CASP8	-0.3014	0.0092	1.409
Q13418	ILK	0.1069	0.1377	0.7384
Q99729-3	HNRNPAB	0.0014	0.1589	0.1767
Q9BVW5	TIPIN	0.0975	1.452	0.1135
Q96SB3	PPP1R9B	-1.0358	2.9243	2.3102
P52298	NCBP2	0.0002	0.0092	0.0145
Q9P032	NDUFAF4	-0.378	1.3534	0.7281
Q9NX40	OCIAD1	0.0768	1.0315	1.0395
Q9UQN3	CHMP2B	0.7938	1.6786	2.0682
O14562	UBFD1	-0.1058	0.2406	0.2371
Q9Y3C4	TPRKB	-0.236	0.4422	0.3624
Q9H7E9	C8orf33	0.2111	2.1116	0.102
Q12765	SCRN1	0.09	0.2177	0.706
Q9BTT0	ANP32E	-0.3943	1.2434	3.0425
Q14919	DRAP1	-0.0577	0.1142	0.3821
P53384	NUBP1	0.3818	0.3065	1.1021
P13693	TPT1	-0.0021	0.7408	0.4643
P62249	RPS16	0.2541	0.8811	0.9678
O95168	NDUFB4	-0.1448	0.3549	0.7086
P23919	DTYMK	-0.1137	0.299	0.3588
P48556	PSMD8	-0.0327	0.716	0.7097
Q9NXS2	QPCTL	-2.4988	10.3341	7.4382
Q14258	TRIM25	0.2709	0.6195	1.3049
Q15084	PDIA6	-0.1295	0.4362	0.5328
Q9HC38-2	GLOD4	-0.1849	1.4452	0.3172
Q96HN2	AHCYL2	1.234	1.6057	1.4804
Q9NVX7	KBTBD4	0.9204	2.0019	2.8972
Q6NZ67	MZT2B;MZT2A	-0.0623	0.0838	0.2936
Q9H0V1	TMEM168;FLJ13576	0.3431	0.3461	2.8101
Q15437	SEC23B	0.7029	1.1657	2.0203
Q9Y3D3	MRPS16	-0.2994	0.4638	0.8294
Q9P2B2	PTGFRN	0.0747	1.8744	0.8526
Q9HA64	FN3KRP	-0.1312	0.0138	0.814
Q9P2E3	ZNFX1	0.4163	0.5246	0.9608
Q96G21	IMP4	0.0484	0.1622	0.263
Q9UHX1-2	PUF60	-0.0345	0.1965	0.3358
P26038	MSN	0.2472	0.8974	1.0773
Q8NBX0	SCCPDH	-0.1379	0.9465	0.0555
Q13190	STX5;STX5A	-0.2274	2.2354	0.2641
P40938	RFC3	0.1195	1.2157	0.0415
Q8WX93	PALLD	0.4806	2.8692	1.6116
P36578	RPL4	-0.1749	0.2317	0.9876
P55263-2	ADK	0.0264	0.1742	0.233
P46937	YAP1	0.2265	0.0414	0.7634
Q9Y3A4	RRP7A	-0.309	1.4516	0.9732
P48960	CD97	-0.0064	0.0112	0.058
Q63ZY3	KANK2	0.4063	0.039	2.3334
Q13442	PDAP1	0.0106	0.2239	0.2219
P40692	MLH1	-0.031	0.5934	0.5382
Q9UKM7	MAN1B1	-0.1365	0.1828	0.1384
P06703	S100A6	0.1309	0.0378	0.8092
Q16836	HADH	0.2788	0.428	1.386
Q96GC9	VMP1	0.5163	1.4979	1.7707
Q02880	TOP2B	-0.1387	0.8172	0.3646
Q14571	ITPR2	-0.0474	0.1442	0.1685
P61960	UFM1	-0.0036	0.3222	0.1409
Q9BTE7	DCUN1D5	-0.1961	0.887	0.3295
O14497	ARID1A	0.3187	0.9855	0.9921
P10412	HIST1H1E	-0.295	0.846	0.7725
P29353	SHC1	0.4392	1.5716	0.481
Q9BY77	POLDIP3	0.1144	1.4427	0.1341
Q9UNI6	DUSP12	0.4274	1.713	0.7368
Q9BWS9	CHID1	-0.4783	0.8554	0.6207
Q9NX01	TXNL4B	0.516	0.8261	2.0501
O75391	SPAG7	0.2657	1.7501	0.5867
Q7RTV0	PHF5A	0.0318	0.0846	0.0137
Q96ER3	SAAL1	0.0643	0.0304	0.2875
P50395	GDI2	-0.1487	0.6443	0.554
Q15366-3	PCBP2	-0.4876	0.3817	1.7954
P61962	DCAF7	-0.5537	0.5401	1.2712
Q93100-4	PHKB	-0.2652	1.389	0.3125
Q92791	LEPREL4	1.0405	2.0697	2.8405
B1AH87	TSPO	0.4381	0.9437	1.5417
G3V1N2	HBA2;HBA1	-0.5341	0.4984	1.231
Q15645	TRIP13	-0.0895	0.0968	0.5909
Q96H55	MYO19	0.2492	0.4817	1.8147
E7EVJ5	CYFIP2	-0.3056	1.3318	0.4786
Q9P2I0	CPSF2	0.1167	1.2014	0.1177
Q9BSJ8	ESYT1	0.2076	0.32	0.9897
P12235	SLC25A4	-0.2354	1.1564	0.1138
Q9UID3	VPS51	-0.0505	0.4552	0.5903
O60664	PLIN3	0.0649	0.2165	0.6711
Q3KQU3	MAP7D1	0.1217	0.8892	0.0644
O15164	TRIM24	-0.5912	0.5122	3.1828
P04181	OAT	-0.0863	0.1638	0.5841
Q07960	ARHGAP1	-0.2286	0.5151	0.9861
P49585	PCYT1A	0.9133	1.4083	1.1826
P20936	RASA1	-0.3247	0.6996	0.7049
Q7L523	RRAGA;RRAGB	0.049	0.7078	0.1379
P24941	CDK2	-0.2252	0.6067	0.9961
Q8IUH3	RBM45	-0.4334	2.2799	1.0026
Q96LR5	UBE2E2;UBE2E3	-0.0751	0.063	0.2131
P26641	EEF1G	0.1922	2.2098	0.1171
O60825	PFKFB2	0.1776	1.1371	0.0129
Q96S82	UBL7	-0.4511	2.2485	1.2706
P16144	ITGB4	0.2393	0.2319	2.0584
Q96A26	FAM162A	-0.3937	1.2153	1.0319
P63208	SKP1	-0.2973	0.5318	1.7091
P21266	GSTM3	-0.0787	1.5835	1.3797
Q7Z2W9	MRPL21	-0.2762	1.1146	0.6396
Q12962	TAF10	0.1261	0.1761	0.2508
Q6IA86	ELP2	0.74	2.4508	2.1699
Q8N0Z6	TTC5	-0.8017	1.7692	2.1818
Q5T4S7	UBR4	0.0072	0.7219	0.3733
P50416	CPT1A	0.443	1.465	2.0625
P43246	MSH2	0.1363	0.1892	0.6356
Q9HAS0	C17orf75	-1.2961	2.6625	2.7116
Q8WUX9	CHMP7	-0.4247	0.3131	1.4006
P56199	ITGA1	0.818	3.0097	2.4924
P82970	HMGN5	-0.0138	0.0293	0.0197
Q56VL3	OCIAD2	-0.256	1.4319	0.3382
Q14696	MESDC2	0.4369	1.4037	1.5625
Q9Y263	PLAA	0.2685	0.5971	1.1954
P17655	CAPN2	-0.0645	0.119	0.417
P52788	SMS	-0.286	1.5121	1.0898
P19784	CSNK2A2	0.0675	0.791	0.224
O94808	GFPT2	0.5482	2.7858	0.3927
Q01650	SLC7A5	0.4842	0.4058	3.0684
Q9HAB8	PPCS	0.0804	1.7039	0.6881
Q99615	DNAJC7	0.2135	0.4899	1.1343
O00461	GOLIM4	0.8717	1.3111	3.5123
Q8WUA4	GTF3C2	-0.1528	0.3512	0.636
Q14980	NUMA1	-0.0024	0.208	0.1049
Q15025	TNIP1	-0.1131	0.0705	0.1799
Q02750	MAP2K1	0.3048	0.5626	1.1468
P25787	PSMA2	-0.2356	0.0229	1.1524
P53611	RABGGTB	1.331	0.8149	1.7154
Q14692	BMS1	-0.3022	1.2756	1.3535
O43765	SGTA	0.2632	0.3796	1.184
Q9BV79	MECR	0.5054	1.7028	1.1734
P51571	SSR4	0.4206	1.0475	1.5211
O95425	SVIL	0.4646	1.0019	0.7275
P20908	COL5A1	0.03	1.3614	1.4416
Q9NWT1	PAK1IP1	0.4223	3.0419	0.488
P51692	STAT5B;STAT5A	0.7273	1.705	3.7832
P26599	PTBP1	-0.1337	0.4446	0.4829
O15511	ARPC5	-0.394	0.6794	2.8231
Q7Z7H8	MRPL10	-0.3586	1.1474	0.9395
P49368	CCT3	-0.0332	0.2546	0.3629
Q8N4A0	GALNT4;POC1B-GALNT4	-2.325	11.2746	8.1881
Q9NW08	POLR3B	-0.4953	1.1065	1.965
Q92466	DDB2	0.7656	2.8672	2.0908
Q9UM00	TMCO1	-0.2642	2.7771	0.1542
Q92643	PIGK	-0.6991	1.3215	2.7948
O75880	SCO1	0.3384	1.6019	0.9144
Q04695	KRT17	0.337	3.304	0.7499
P56385	ATP5I	-0.1564	0.2216	0.6874
Q96HP4	OXNAD1	0.2641	0.6861	1.0629
O95202	LETM1	-0.1886	0.8736	0.4916
Q15404	RSU1	-0.3932	2.6411	1.6619
Q9BQP7	MGME1	0.2266	1.9608	0.0901
Q96GM5	SMARCD1	0.1206	0.1289	0.4416
Q9UKX7	NUP50	-0.3278	1.6336	0.7349
P52272-2	HNRNPM	0.0229	0.0883	0.1715
Q9NZI8	IGF2BP1	0.3473	0.002	2.2842
Q92769	HDAC2	-0.5244	1.4043	2.3281
Q9Y3I0	RTCB	-0.1181	1.3082	0.1738
P19174	PLCG1	0.0896	0.117	0.3667
P08133	ANXA6	0.3011	1.2567	1.3981
Q13472	TOP3A	0.4661	1.3107	1.0048
Q96IR7	HPDL	0.2616	2.2192	0.1725
Q9Y496	KIF3A	-0.1594	0.2631	0.2167
O95372	LYPLA2	0.0228	1.6332	1.004
P57740	NUP107	-0.2287	1.0216	0.4577
Q969S9	GFM2	0.1917	0.2792	1.5307
Q9NPF4	OSGEP	0.0735	1.1292	0.6249
O75676	RPS6KA4	-0.4194	0.7757	1.1476
Q15435	PPP1R7	-0.3668	1.6619	1.4452
P30044	PRDX5	-0.4589	0.9786	2.584
Q9H845	ACAD9	0.3326	1.301	0.7129
Q14353	GAMT	0.0262	0.2454	0.1479
Q8WWC4	C2orf47	-0.4237	1.4903	0.4794
Q8IVF2-3	AHNAK2	-0.2099	1.6872	0.2539
P11310	ACADM	-0.1651	0.334	0.6961
P0CG12	CHTF8	0.5968	2.874	0.3159
P04183	TK1	-0.1284	0.1115	0.6894
Q8N5L8	RPP25L	-0.4936	1.3495	1.3751
Q8NHV4	NEDD1	0.0525	0.8522	0.2502
P14625	HSP90B1	-0.0717	0.0465	0.3576
Q13356	PPIL2	-0.5805	3.1616	1.4642
O95251	KAT7	0.0851	0.727	0.1914
O14656	TOR1A	0.7951	0.7766	2.9652
Q9Y487	ATP6V0A2	1.027	2.6433	2.6866
Q9BW71	HIRIP3	-0.5214	0.5439	1.1221
Q16643-2	DBN1	0.1808	0.352	0.8576
O75964	ATP5L	0.1839	0.7401	0.4183
O75179	ANKRD17	-0.3515	0.9126	1.4009
P50570-3	DNM2	-0.0624	0.6202	0.1418
Q92878	RAD50	-0.2259	0.5659	0.8106
Q9BUP3-3	HTATIP2	0.4254	1.8656	2.4707
Q9GZY4	COA1	0.2364	0.9994	0.1571
Q9ULH0	KIDINS220	-0.1325	1.0728	0.2982
Q96GC5	MRPL48	0.0964	0.5726	1.1094
Q13177	PAK2	-0.3627	1.754	1.2956
Q96IZ0	PAWR	0.2251	0.9942	0.377
P60842	EIF4A1	-0.2047	0.7817	0.9001
Q9Y376	CAB39	-0.1915	1.0213	0.4127
P49005	POLD2	-0.0158	0.0752	0.0798
Q00839	HNRNPU	0.0369	0.2368	0.0693
Q14814	MEF2D	0.1822	0.2663	0.7734
Q8ND56	LSM14A	-0.1052	0.7921	0.1568
P62158	CALM1;CALM2;CALM3	-0.3103	1.7875	1.0177
O75915	ARL6IP5	0.4368	0.2754	2.9509
P62841	RPS15	-0.798	4.1871	1.3538
C9JAG1	EPT1	-0.3544	0.3621	2.0512
P48637	GSS	-0.1276	0.047	0.8815
P49903	SEPHS1	-0.1285	2.2969	0.5197
Q8NHZ8	CDC26	0.0191	0.3607	0.3396
P62899	RPL31	0.4897	1.9078	1.9144
Q9NQZ2	UTP3	-0.0902	0.2411	0.4938
O43681	ASNA1	-0.1698	0.3632	0.5809
P48449	LSS	0.3177	1.2278	0.9143
Q86WB0	ZC3HC1	-0.1739	0.086	0.3601
Q969U7	PSMG2	-0.4597	1.0622	2.6983
O75223	GGCT	0.291	0.9935	1.1044
P60900	PSMA6	-0.2669	1.0111	1.4822
Q9NWU1	OXSM	-0.2415	0.6379	0.4773
P08708	RPS17;RPS17L	0.429	1.3389	1.9788
Q9Y490	TLN1	-0.1231	0.5964	0.4414
Q9NTJ5	SACM1L	0.0901	0.0799	0.434
O75787	ATP6AP2	0.3039	0.1353	1.8467
Q86U38	NOP9	-0.1054	1.6283	1.7004
P11388	TOP2A	-0.3211	0.4686	2.544
Q9BPZ7	MAPKAP1	1.0245	0.9181	3.7702
P09234	SNRPC	-0.128	0.1228	0.5184
Q9Y5Q8	GTF3C5	-0.2569	0.3855	1.0839
Q9NRN7	AASDHPPT	0.1355	1.5306	0.4594
Q13614	MTMR2	-0.1108	0.0837	0.6171
P36639	NUDT1	-0.0899	0.3218	0.8882
P25705	ATP5A1	0.083	0.604	0.1878
Q9UHY7	ENOPH1	-0.3469	1.599	1.1133
O95707	POP4	-0.0112	0.9363	0.4799
O00468-6	AGRN	0.2258	0.5378	0.6637
Q99961	SH3GL1	0.0819	1.0106	0.2767
Q155Q3	DIXDC1	1.242	0.6457	9.4462
Q13907	IDI1	-0.051	0.5532	0.1254
P11142	HSPA8	-0.1553	0.2631	0.9494
Q13217	DNAJC3	0.2984	0.0566	1.1425
Q9H0D6	XRN2	-0.195	0.5315	0.5646
Q32P28	LEPRE1	0.8194	3.3659	3.793
O94925-3	GLS	-0.1038	0.5759	0.075
Q92747	ARPC1A	-0.866	0.7349	6.6605
P07437	TUBB	-0.4627	1.3808	2.037
Q9NYH9	UTP6	-0.41	0.0942	2.6519
Q8IZQ5	SELH;C11orf31	0.0718	0.7746	0.9803
A6NDG6	PGP	-0.1179	0.345	0.8892
E9PAV3	NACA	-0.39	1.9282	1.5416
O43929	ORC4	-0.065	0.301	0.0196
Q9BRX5	GINS3	-0.318	0.9108	1.2835
Q9UKK6	NXT1	-1.0665	9.2162	1.6146
P15374	UCHL3	0.0204	0.421	0.1707
O15347	HMGB3	-0.2384	0.2529	1.478
Q96SY0	VWA9	-0.3597	0.8188	1.334
Q9GZZ9	UBA5	0.4782	0.5948	2.7613
Q08AF3	SLFN5	0.0629	1.3146	0.4931
Q96A35	MRPL24	-0.3469	1.1039	1.1956
Q8IZ83	ALDH16A1	1.1273	3.6089	0.9896
P49770	EIF2B2	-0.2037	0.4132	0.6421
Q8TCE6	FAM45A;FAM45B	0.1349	0.5184	0.2305
A6NHR9	SMCHD1	-0.283	0.4283	1.5205
O00629	KPNA4	0.3608	0.1716	1.5499
Q07817	BCL2L1	-1.1899	3.609	2.7349
Q9BWJ5	SF3B5	0.0477	0.71	0.5105
Q13228	SELENBP1	-0.0215	0.5069	0.5237
Q68EM7-5	ARHGAP17	-0.0854	0.575	0.0496
Q9H7Z7	PTGES2	-0.4483	1.5325	2.1409
Q16595	FXN	0.1217	0.6016	0.0252
A8MTT3	CEBPZOS	0.1683	0.0925	0.7825
P03928	MT-ATP8	0.4068	0.6375	1.9662
Q9NXW9	ALKBH4	0.3128	1.1608	0.4649
P49915	GMPS	0.0355	0.4174	0.0947
Q9HD47	RANGRF	0.5294	0.8653	2.4715
Q9NVX2	NLE1	0.3708	1.7522	0.1562
Q15738	NSDHL	-0.1574	1.2843	0.2287
P62424	RPL7A	0.1198	0.7735	0.2733
Q7Z5G4	GOLGA7	0.0526	0.4393	0.6981
Q86W50	METTL16	0.3263	1.4506	0.1359
P17029	ZKSCAN1	0.7264	2.1111	4.15
P54687	BCAT1	0.0839	0.4728	0.0049
Q6UVJ0	SASS6	-1.2491	8.774	5.0605
Q6DD88	ATL3	0.3538	1.0636	2.021
Q9UL18	AGO1;AGO4	0.5433	1.7339	1.1589
O15145	ARPC3	-0.2298	1.8984	3.1965
P0CG30	GSTT2B;GSTT2;Em:AP000351.3	-0.4009	0.6404	1.1948
O75525	KHDRBS3	-0.0262	7.1073	7.9309
I3L3E8	MED11	-0.2918	0.4294	0.0992
Q13112	CHAF1B	0.1835	0.1496	0.5394
A0AVT1	UBA6	-0.0858	0.2398	0.3663
Q8NBK3	SUMF1	0.6279	0.9166	2.212
O15530	PDPK1;PDPK2	0.6352	2.3234	0.5345
O15446	CD3EAP	-0.1744	0.6657	1.1707
P39023	RPL3	0.0955	0.0983	0.5398
Q5VVM6	CCDC30	0.9418	1.5011	2.6987
Q9H013	ADAM19	0.6111	1.738	2.1803
Q92609	TBC1D5	-0.4237	0.2646	3.1163
A0MZ66	KIAA1598	0.0372	0.2056	0.047
Q9UBQ0	VPS29	0.0697	0.2309	0.5479
Q969T9	WBP2	0.0585	0.7261	0.867
Q69YU5	C12orf73	0.167	0.6456	0.3273
O60476	MAN1A2	-0.4066	6.8237	2.1881
O15160	POLR1C	0.5837	1.8805	0.6819
O14776	TCERG1	-0.0405	0.0553	0.2189
Q5JTJ3-3	COA6	-0.4042	1.0665	1.4412
Q9P000	COMMD9	0.2768	1.7136	0.4461
P61224	RAP1B	-0.3712	0.9776	1.1215
Q96R06	SPAG5	-0.0599	0.3182	0.0826
Q15043	SLC39A14	-0.0871	0.3737	0.3637
P46939	UTRN	0.1536	0.1701	0.6651
Q6P4A7	SFXN4	-0.3847	0.8883	1.0229
P61086	UBE2K	0.1628	1.6748	0.0847
Q5VT66	MARC1	-0.8375	0.3419	1.2666
Q9P275	USP36	-1.2586	5.6703	5.5121
Q9NVU7	SDAD1	0.0365	0.446	0.4563
P84157	MXRA7	0.4417	2.3542	0.1039
Q96B49	TOMM6	-0.1958	2.1494	0.2459
O14936	CASK	0.327	2.4219	0.1946
Q6IQ26	DENND5A;DENND5B	-0.1018	1.8227	1.2775
Q96NJ6	ZFP3	0.9269	4.7251	4.7836
O75506	HSBP1	-0.2917	2.2447	0.2016
Q8N142	ADSSL1	0.3967	1.6037	0.3721
Q9UJ83	HACL1;PHYH2	-0.4945	1.4608	1.5696
P18669	PGAM1	0.118	0.4591	0.4566
P51948	MNAT1	-0.077	0.2581	0.6017
Q8WVJ2	NUDCD2	-0.193	0.4319	0.7371
O75400	PRPF40A	-0.0356	0.0421	0.2313
Q5T200	ZC3H13	0.9813	1.4009	2.6287
Q00535	CDK5	-0.4094	2.1911	0.9458
Q96DH6	MSI2;IGSF9B	-0.0248	0.2838	0.2072
Q9NZM1	MYOF	0.1131	0.1764	0.9321
Q13015	MLLT11	0.9287	5.5102	2.3233
Q92626	PXDN	1.737	2.6518	5.3559
O43709	WBSCR22	-0.011	0.0082	0.209
Q8TBC4	UBA3	-0.0356	0.4754	0.6109
Q8NDC0	MAPK1IP1L	-0.3773	1.1811	1.195
Q92504	SLC39A7	-0.313	0.766	0.3884
P15121	AKR1B1	-0.3503	2.201	0.6343
F6XY72	NME1-NME2	-1.0473	1.5947	1.8817
O95295	SNAPIN	0.2658	0.8894	0.3235
Q8N0X7	SPG20	0.2139	1.029	2.4492
Q16270	IGFBP7	0.3377	1.2335	0.4119
Q5TDH0	DDI2	0.011	0.4342	0.2287
O14639	ABLIM1	0.1291	0.5625	0.1048
P13807	GYS1	-0.3878	0.0648	2.5866
Q9UHA4	LAMTOR3	0.2727	0.9724	0.1433
P37198	NUP62	-0.0558	1.4056	0.7911
Q9BRX2	PELO	0.1416	0.075	0.7515
Q9UL42	PNMA2	-0.4893	1.5612	2.1251
P11441	UBL4A	0.178	0.0488	0.8748
Q9BSL1	UBAC1	-0.4237	1.3801	0.2862
P48059-2	LIMS1	0.0592	0.3567	0.0183
Q9BVT8	TMUB1	-1.099	7.7823	0.0612
Q8N122	RPTOR	0.415	1.4703	0.6597
P82979	SARNP;CIP29	-0.0033	0.6156	0.2462
O95551	TDP2	0.4037	1.3659	1.4918
Q9NW15	ANO10	-0.4736	0.7042	2.4223
Q9BW85	CCDC94	0.1019	0.0112	0.5822
Q13315	ATM	0.5687	0.47	0.3714
P08579	SNRPB2	-0.3524	1.2366	1.581
P62195	PSMC5	-0.0548	0.2257	0.1286
Q86X83	COMMD2	-0.1769	1.6102	0.1182
Q8TF01	PNISR	-1.6454	2.6359	1.7632
Q7Z3B4	NUP54	0.1542	1.2693	0.1915
O43809	NUDT21	-0.2637	0.4182	1.2488
P00846	MT-ATP6	0.7744	3.004	0.6729
P49736	MCM2	0.6563	1.7181	4.1645
P61204	ARF3;ARF1	0.2689	0.0812	1.2104
Q9UI15	TAGLN3	-2.0003	1.6207	10.5091
P21291	CSRP1	0.1812	0.3462	0.7114
Q15833	STXBP2;ZNF14	-0.7167	0.6202	1.6124
P50991	CCT4	-0.1716	0.6831	0.8492
Q96N67	DOCK7	0.4095	1.0684	0.8846
Q9H0B6	KLC2	0.4514	1.4554	0.8437
Q15019	SEPT2	-0.0003	0.0205	0.0319
Q15526	SURF1	-0.7017	1.9377	2.0561
Q9Y3D6	FIS1	-0.1668	0.6185	0.1694
O94992	HEXIM1	-0.3629	0.1648	1.8222
P05388	RPLP0;RPLP0P6	-0.192	0.4686	1.0009
Q15599	SLC9A3R2	0.5489	1.0908	2.5299
Q8WWI1-3	LMO7	-0.2008	0.8894	1.952
O75340	PDCD6	-0.0183	0.1601	0.0687
Q96FN4	CPNE2	0.7762	0.1579	3.91
P17844	DDX5	-0.0736	0.0831	0.3598
Q8WTW3	COG1;ADCK1	0.5027	1.1438	1.1968
Q12797	ASPH	0.23	1.1882	0.6915
P19623	SRM	-0.3423	1.0418	1.4466
Q96PU4	UHRF2	-0.0253	0.591	0.5567
Q9NYU2	UGGT1	0.1944	0.0352	1.4633
O00193	SMAP;C11orf58	0.1519	0.2183	0.5393
Q96G23	CERS2	0.1604	0.0967	0.2397
Q96DI7	SNRNP40	0.0586	0.0943	0.3875
Q6YHK3	CD109	0.5794	2.0448	0.7647
P09132	SRP19	0.181	0.1725	0.6438
P41743	PRKCI	-0.5438	1.8941	0.7631
O14981	BTAF1	0.4536	0.8702	1.3222
Q9BUR5	APOO	-0.9627	1.8688	1.5454
Q96KP1	EXOC2	0.0705	0.6225	0.0861
O60936-2	NOL3	0.0809	3.6327	0.8692
P09104	ENO2	0.1229	0.6128	0.0871
Q8TED1	GPX8	-0.0349	0.3423	0.0567
Q9Y3A6	TMED5	0.1487	0.0024	0.712
Q92896	GLG1	0.4805	0.0103	2.7083
Q9H3R0	KDM4C	1.2078	3.1902	8.4295
Q96SZ5	ADO	-0.5199	0.8814	2.9156
Q15042	RAB3GAP1	0.4516	1.4772	1.7995
Q6UB99	ANKRD11	0.066	0.2251	0.2078
O60508	CDC40	-0.6627	1.8134	2.1074
O43491	EPB41L2	0.2443	0.3115	1.0913
Q14457	BECN1	-0.6502	1.738	1.4745
Q9Y295	DRG1	-0.083	0.5473	0.016
Q01658	DR1	-0.4603	3.0614	1.2518
Q16543	CDC37	-0.1196	0.414	0.3571
O94842	TOX4	0.4299	0.7586	1.4276
Q96AY4	TTC28	-0.0452	0.1417	0.2887
Q9H857	NT5DC2	-0.3281	0.4122	1.1165
Q9BV86	NTMT1	0.423	3.5819	0.7531
Q9Y5J9	TIMM8B	-0.8843	4.3991	1.7262
Q8N490-2	PNKD	0.1227	0.4812	0.6242
P51636	CAV2	0.4128	0.1443	2.048
Q9UL46	PSME2	0.1728	1.1862	0.0291
Q96IU4	ABHD14B	-0.2782	0.0426	1.1514
Q15714	TSC22D1	0.2279	1.0704	0.1632
P09110	ACAA1	-0.044	0.4321	0.0036
Q14566	MCM6	0.4781	0.2396	3.541
P17026	ZNF22	-0.0187	0.7054	0.469
P38646	HSPA9	-0.0616	0.1844	0.2452
Q96FZ7	CHMP6	0.4114	1.1135	2.9684
O60678	PRMT3	-0.2687	0.7323	1.016
Q9UH65	SWAP70	-0.2186	2.1191	0.0084
Q96H79	ZC3HAV1L	0.3277	0.8559	2.3522
Q15904	ATP6AP1	0.0593	0.3976	0.657
P09525	ANXA4	0.0401	0.3441	0.0802
P40222	TXLNA	0.3635	0.6842	1.6858
Q9NWV8	BABAM1	0.8805	2.771	4.3397
Q8WWQ0	PHIP	-0.0803	0.7961	1.1363
Q16186	ADRM1	0.1208	0.0156	0.7598
O43707	ACTN4	0.1079	0.4773	0.3624
Q9BPX6	MICU1	-0.2583	0.3944	0.5631
P24539	ATP5F1	-0.0404	0.3845	0.0153
P18085	ARF4	-0.0778	0.8628	0.1146
P57081	WDR4	-0.1459	0.0985	0.8118
P38919	EIF4A3	-0.1703	0.2008	0.9307
Q9NX62	IMPAD1	0.1133	0.5847	1.1518
P02545	LMNA	0.1779	0.705	0.7199
Q96RQ3	MCCC1	0.1649	0.1665	0.9343
P08648	ITGA5	0.5115	2.5845	2.1114
P57737-3	CORO7;hCG_1787779	0.1868	0.3998	0.6211
Q5LJA5	UCHL5	-0.2312	0.1353	1.2827
Q9Y680	FKBP7	-0.7628	3.225	1.8874
A2ABF8	EHMT2	-1.0369	0.3178	0.1087
Q9H4A3	WNK1	0.4062	0.5713	1.5688
P08574	CYC1	0.1658	2.0157	0.2575
Q96KP4	CNDP2	-0.5385	1.6501	2.7372
P35080-2	PFN2	0.1935	0.4626	0.7913
Q9Y580	RBM7	0.2728	0.4179	0.3771
Q7L5N1	COPS6	-0.0928	0.4909	0.2714
Q9H7E2	TDRD3	0.2153	0.3379	0.6128
Q96BJ3	AIDA	-0.0795	0.0132	0.4035
Q9NPA8	ENY2	0.1258	0.0178	0.5058
P17987	TCP1	0.1008	0.4847	0.2839
Q14012	CAMK1	0.2894	1.2221	0.5583
Q02388	COL7A1	0.7179	1.2586	1.4636
Q9UII2	ATPIF1	0.2448	0.045	1.1051
Q92499	DDX1	-0.1182	0.7509	0.3587
Q96T88	UHRF1	-0.0583	0.0001	0.3039
Q8NDI1-3	EHBP1	-0.6051	1.0237	0.1261
P07108	DBI	0.0592	0.2163	0.0199
Q6DKK2	TTC19	-0.1918	0.7291	0.0963
P42704	LRPPRC	0.0553	0.2457	0.158
P42226	STAT6	0.4315	2.5732	0.3609
P37268	FDFT1	-0.0319	1.0063	0.8471
O95081	AGFG2	-0.0781	1.5145	0.7333
Q00796	SORD	-0.0189	0.4054	0.0862
Q06323	PSME1	-0.2872	0.3145	1.7469
Q00537	CDK17	0.4133	0.6495	1.2523
P21796	VDAC1	-0.1585	0.5362	0.6186
O75312	ZPR1	0.1254	0.1238	0.5931
Q9BV19	C1orf50	0.5618	2.135	4.0174
Q9UNF0	PACSIN2	0.2847	0.5115	0.9348
P62191	PSMC1	-0.2069	1.0804	0.5253
Q9NVI7-2	ATAD3A	0.1922	0.3676	0.9916
Q05397	PTK2	-0.1954	1.3473	0.0282
P17813	ENG	0.6808	1.7326	2.5699
Q9BZF9	UACA	0.6967	2.4051	2.0507
P49761	CLK3	0.5364	2	0.1245
Q9NSD9	FARSB	-0.18	0.1916	1.0379
Q92576	PHF3	-0.4651	0.7848	1.7702
Q9UPT8	ZC3H4	-0.0032	0.8852	0.5504
Q07020	RPL18	0.2273	0.4005	0.9214
P52888	THOP1	-0.3147	1.1195	1.141
Q15813	TBCE	-0.5828	3.5092	1.3373
O75323	GBAS	-0.0394	0.527	0.4841
P33552	CKS2	1.6671	4.3543	4.1595
Q12888	TP53BP1	0.0527	0.0562	0.3278
P59998	ARPC4;ARPC4-TTLL3	-0.7951	0.3794	4.7067
Q9P0J7	KCMF1	1.7445	8.6548	4.5548
Q9H6X2	ANTXR1	0.0072	0.3365	0.2135
Q9NXG2	THUMPD1	0.01	0.4517	0.438
Q13617	CUL2	-0.0508	0.1865	0.0919
Q8IYB8	SUPV3L1	-0.1391	0.815	0.1231
P49257	LMAN1	0.2012	0.3984	0.7346
P49189	ALDH9A1	0.2671	0.7328	0.9367
Q13627	DYRK1A;DYRK1B	-0.2554	0.0472	1.3309
Q9Y230	RUVBL2	0.3911	3.1529	0.9587
Q8WXH0	SYNE2	-0.3052	1.8198	0.18
Q8NFJ5	GPRC5A	0.4452	0.1277	2.6384
P98160	HSPG2	2.9066	3.6574	5.4625
P15880	RPS2	0.0189	0.1824	0.0011
Q9UHD2	TBK1	-0.2566	1.4535	0.5272
Q9H773	DCTPP1	-0.4636	1.9481	0.6258
P12004	PCNA	0.1505	0.9916	0.2914
Q13126	MTAP	0.0243	0.9567	0.3347
Q8NEY8-2	PPHLN1	0.4085	1.7366	0.5961
Q9UK76	HN1	0.3217	1.0358	1.1514
Q13257	MAD2L1	-0.7888	0.3178	2.433
Q53GS7	GLE1	-0.1633	0.4113	0.463
P26196	DDX6	-0.0253	0.1168	0.0589
Q9NX74	DUS2	-0.7173	1.5541	0.4559
P61604	HSPE1	-0.0444	0.5612	0.05
P35269	GTF2F1	-0.307	0.8412	0.7004
Q9BVG4	PBDC1	-0.122	0.1393	0.8256
Q9GZM3	POLR2J2;POLR2J;POLR2J3;POLR2J1	0.2061	0.1568	1.4212
Q9BXP5	SRRT	0.1541	0.0415	0.9693
Q8NB90	SPATA5	-0.3104	1.4441	1.3085
Q86TB9	PATL1	0.3757	0.1566	1.6651
Q9Y618	NCOR2	0.0872	0.6598	0.1407
O43615	TIMM44	-0.2461	0.4595	1.0252
Q92616	GCN1L1	-0.0073	0.0364	0.0651
Q9UI95	MAD2L2	-0.4856	1.9888	0.844
Q01518-2	CAP1	0.0365	0.9181	1.3111
Q9P016	THYN1	0.028	0.0333	0.0113
Q9NW64	RBM22	0.3367	1.5661	0.3082
Q96RN5	MED15	-0.2873	0.7217	1.2298
P62487	POLR2G	0.0972	0.0008	0.175
Q96T60	PNKP	-0.3696	0.3482	1.8441
O14579	COPE	0.0232	0.1641	0.0257
P50151	GNG10	-0.6306	0.0045	0.509
Q15005	SPCS2	0.2151	0.0238	1.3535
Q8TBA6	GOLGA5	1.1748	1.8983	1.6441
Q13438-6	OS9;OR7D2	-0.4993	1.5463	0.6597
Q9UJY4	GGA2	0.4207	0.93	0.6893
Q99570	PIK3R4	0.2075	0.7669	0.3794
Q16822	PCK2	-0.1187	0.7372	1.2533
O00422	SAP18	0.0076	0.6521	0.5701
P61956	SUMO2	0.2397	0.3605	0.5905
Q9H5V9	CXorf56	-0.5792	0.1662	2.7235
O00560	SDCBP	0.7107	3.2425	1.6878
Q9H7D0	DOCK5	-0.3452	1.3942	0.1839
P45954	ACADSB	0.3354	1.0652	0.8655
Q07954	LRP1	0.5382	1.0784	1.0083
Q7L2J0	MEPCE	0.3532	2.3987	0.3338
Q96J01	THOC3	-0.2617	0.8033	0.5353
Q9UI30	TRMT112	0.1186	1.2181	0.0005
O43818	RRP9	0.3635	1.6236	0.8135
Q8TB61	SLC35B2	0.1736	0.4735	0.3855
Q92545	TMEM131	-1.5374	6.2697	1.7601
P42345	MTOR	-0.2763	1.4957	0.7459
O43143	DHX15	-0.1361	0.3999	1.4489
Q13451	FKBP5	0.0578	0.3442	0.0254
Q9Y265	RUVBL1	-0.2186	0.4027	1.0085
Q01518	CAP1	0.1303	0.1076	0.7054
P05455	SSB	-0.4421	1.6091	2.6312
Q5SW79	CEP170	-0.0678	0.387	0.146
P36871	PGM1	0.0667	0.1057	0.2806
O15498	YKT6	-0.2351	1.3229	0.3413
Q9UNZ2	NSFL1C	-0.1062	0.6554	0.1688
P04843	RPN1	0.0149	0.8868	0.7729
Q99614	TTC1	0.1652	0.3859	0.6075
Q13613	MTMR1	0.1051	0.2869	0.9119
Q13045	FLII	0.0439	0.6629	0.1614
Q13439	GOLGA4	-0.1918	0.4894	0.5303
P50213	IDH3A	0.1905	0.6134	0.4602
C9J6N5	FAM107B	-0.0749	0.2479	0.662
O94826	TOMM70A	0.1398	0.3298	0.7008
P31350	RRM2	0.0648	0.4264	0.8799
O00479	HMGN4	-0.1788	0.0586	0.5593
O60645	EXOC3	-0.0074	0.8827	0.3579
O95302	FKBP9	0.036	0.1766	0.3479
Q8IVS2	MCAT	-0.2972	0.4972	0.9403
P40123	CAP2	0.2631	0.1527	1.0789
Q13769	THOC5	0.125	0.2141	0.4551
Q9UNM6	PSMD13	0.2777	1.3166	0.8104
Q9Y2Z4	YARS2	-0.1673	1.064	0.091
Q9NVN8	GNL3L	-0.8985	2.7213	2.2422
O60563	CCNT1	-0.0182	0.1006	0.2627
Q969V3	NCLN	0.1651	0.1687	0.5707
Q13188	STK3	0.7278	8.4938	0.3889
P52294	KPNA1	0.0799	0.7192	0.035
O15460-2	P4HA2	0.059	0.2647	0.5198
Q9BWU0	SLC4A1AP	-0.2115	0.2914	0.7333
Q969G3	SMARCE1	-0.0872	0.3768	0.1693
P32929	CTH	0.103	0.1687	0.2633
Q9UHJ6	SHPK	0.2908	1.0566	0.6463
P31751	AKT2	0.1222	0.6759	0.0564
P13473	LAMP2	0.0285	0.0385	0.1643
P15151	PVR	1.1908	1.9391	3.8759
P49207	RPL34	0.2737	0.2009	1.423
P28300	LOX;LOXL1	-0.5909	0.5428	5.5234
P06756	ITGAV	0.25	0.5884	1.3492
Q06587	RING1	0.0007	0.1603	0.2359
Q8N257	HIST3H2BB	-3.1401	5.4817	13.2524
O75376	NCOR1	-0.5338	0.7084	0.5877
Q9BRX8	FAM213A	-0.4389	1.0702	0.4974
Q14671	PUM1	-0.8115	2.2255	3.9113
P31946	YWHAB	-0.3031	0.7902	1.636
E9PK52	EPB41L2	-0.2753	0.8799	0.0467
P78318	IGBP1	-0.0088	0.399	0.4085
Q9Y4Y9	5	0.3616	0.5452	1.1509
Q14690	PDCD11	-0.108	0.1133	0.583
Q13526	PIN1	-0.1416	0.2672	0.5515
P61764	STXBP1	0.076	0.8795	0.1385
P07686	HEXB	0.0191	0.4317	0.407
E7EWI9	HNRNPA3	0.0245	0.1904	0.238
Q49A26-3	GLYR1	-0.3188	0.5791	1.4674
Q9UI10	EIF2B4	0.0673	0.5492	0.0625
P09543	CNP	0.1321	0.0467	0.7674
Q14185	DOCK1	-0.0262	0.2774	0.2659
Q9GZR2	REXO4	0.1661	0.2582	0.8183
P14678	SNRPB;SNRPN	0.0117	0.1402	0.0881
Q8WZ82	OVCA2	0.1067	0.3782	0.2378
O43399-2	TPD52L2	-0.4819	3.3517	0.6566
P03905	MT-ND4	0.0807	0.1471	0.5787
Q8N5V2	NGEF	0.9367	3.3871	3.5241
Q68CZ6	HAUS3	0.0069	0.419	0.3163
Q8NDH3	NPEPL1	-0.3664	2.0882	0.4601
Q9GZQ8	MAP1LC3B;MAP1LC3B2	0.53	1.7447	1.66
P51151	RAB9A;RAB9B	-0.3473	0.9145	0.7308
P78536	ADAM17	0.2188	0.1473	1.2324
O95747	OXSR1	-0.2397	1.0184	0.6023
Q9H2J4	PDCL3	-0.1883	0.461	0.529
P33121	ACSL1	0.4725	0.0479	0.8434
Q9H4I9	SMDT1	0.4662	1.0083	1.0495
P48147	PREP	-0.3896	1.8995	1.0274
P32456	GBP2	0.1581	0.2365	0.6771
P29558	RBMS1	0.026	0.6749	0.2865
Q9UFN0	NIPSNAP3A	0.1371	0.1003	0.4739
Q14974	KPNB1	-0.0895	0.2699	0.3162
P11047	LAMC1	0.3694	0.1275	1.921
P23368	ME2	0.0563	0.0646	0.3042
Q6ZRS2	SRCAP	2.183	1.0412	4.2545
Q9Y2T2	AP3M1	-0.0794	0.4596	0.123
O95249	GOSR1	-0.7189	0.483	3.4408
Q01082	SPTBN1	0.0665	0.8867	0.1427
O94822	LTN1	-0.2296	0.9716	0.342
Q7L592	NDUFAF7	-0.376	0.4696	1.2809
Q14739	LBR	0.6351	4.3891	2.3384
Q9Y221	NIP7	-0.4083	0.1744	2.1189
Q9Y584	TIMM22	0.1617	1.2454	0.1611
Q14254	FLOT2	-0.0046	0.0767	0.0432
O43896	KIF1C	0.297	0.6949	0.4832
Q9NYG2	ZDHHC3	0.765	2.1766	4.5262
Q9NUL7	DDX28	-0.0618	0.0668	0.3254
Q9P0J1	PDP1	-0.2965	0.8173	0.6823
P84090	ERH	0.4634	1.4808	1.7008
Q9Y4L1	HYOU1	0.1557	0.0742	1.0881
P62847	RPS24	-0.3953	0.5012	2.4013
Q96RP9	GFM1	-0.1981	0.9131	0.6372
Q5T3I0	GPATCH4	-0.4636	0.0675	1.3901
Q9Y4P1	ATG4B	-0.1479	0.0752	0.0688
Q08752	PPID	-0.0382	0.1602	0.0047
Q86VI3	IQGAP3	-0.1187	0.3021	0.5035
P22830	FECH	0.2906	0.5827	0.9416
P26232	CTNNA2	0.0033	0.9435	0.5072
Q9BTX1	NDC1	-0.4141	0.4324	2.0339
Q68E01	INTS3	0.395	0.8496	0.3806
Q96TA2	YME1L1	-0.0355	0.121	0.0443
Q6GMV3	PTRHD1	0.053	1.3679	1.2277
Q9H1B7	IRF2BPL	0.6109	1.9389	1.1218
Q9UHA3	RSL24D1	-1.9332	0.987	8.3287
Q96EL3	MRPL53	0.1127	0.119	0.1767
Q96NT0	CCDC115	-1.4053	4.3002	3.5499
Q9H6B1	ZNF385D	-1.0907	7.1825	3.2065
Q9Y2R5	MRPS17	-0.24	0.6272	0.4578
Q969S3	ZNF622	-0.0866	0.2132	0.2902
Q9UKS6	PACSIN3	-0.1914	0.4066	2.0205
Q5T0D9	TPRG1L	-1.246	8.0727	0.0158
Q9UBN4	TRPC4;TRPC5	-0.696	0.5933	3.0831
Q9Y2X3	NOP58	-0.3292	1.8241	1.7311
Q86U28	ISCA2	0.3841	0.9985	0.7646
Q12800	TFCP2	0.3068	2.5514	0.0978
Q92905	COPS5	-0.1675	0.3836	0.3594
Q9BZV1	UBXN6	-0.146	1.9207	0.6131
P42892	ECE1	0.2026	0.3557	1.1427
Q70E73	RAPH1	-0.0056	0.3625	0.2576
Q8IZ21	PHACTR4	0.4561	2.533	0.3009
Q92900	UPF1	-0.2391	0.5585	1.2829
O75832	PSMD10	0.0595	0.6043	0.2054
Q5F1R6	DNAJC21	0.1956	0.4158	1.0544
Q9NYJ1	COA4	0.4688	1.4591	1.4923
Q14155-1	ARHGEF7	-0.0646	0.6484	0.1165
O43251	RBFOX2;RBFOX1;RBFOX3	0.3429	1.4365	0.9055
Q9NY33	DPP3	-0.5092	1.2474	1.0043
Q12882	DPYD	-0.4189	0.8142	1.5212
O75489	NDUFS3	-0.0718	0.3396	0.0041
P78371	CCT2	-0.1597	0.6842	0.7253
P38117	ETFB	-0.1331	0.5655	0.2509
P07602	PSAP	-0.3558	1.5395	1.0073
Q02252	ALDH6A1	-0.1883	0.9549	0.3877
Q9H0U3	MAGT1	0.2322	0.0246	1.3541
P62857	RPS28	0.2049	0.4733	0.7026
P62917	RPL8	0.2957	0.8516	1.4415
P26440	IVD	0.4393	1.7019	0.8495
Q00534	CDK6	-0.9927	3.6314	1.438
Q9UBX3	SLC25A10	-0.237	0.1099	0.7615
P53618	COPB1	-0.0137	0.1328	0.0063
Q08945	SSRP1	-0.1077	0.0943	0.4637
Q9NUP9	LIN7C	-0.0166	0.3441	0.0203
Q8TCT9	HM13	-0.1643	0.3128	0.1593
Q15642	TRIP10	0.1751	0.0595	1.2407
Q9UN37	VPS4A	0.0325	1.4703	0.8043
Q16891	IMMT	-0.5865	2.0649	1.7889
Q9UKK9	NUDT5	-0.401	1.2224	2.5278
Q6PIW4	FIGNL1	0.3996	0.4782	1.2286
O43813	LANCL1	-0.5461	2.7695	1.5877
Q9Y5J1	UTP18	-0.402	0.7421	1.1903
Q13227	GPS2	0.3594	0.5603	1.1766
Q9UHW5	GPN3	0.4464	1.072	1.2865
Q9UKY7	CDV3	0.3629	1.7753	0.585
Q96ES7	CCDC101	-0.1158	1.0016	0.1213
P51858	HDGF	0.0028	0.4765	0.3052
P42330	AKR1C3	-0.1583	0.4581	0.2807
O43852	CALU	0.0105	0.9305	0.7226
Q9Y446	PKP3	-0.636	1.2046	1.1996
P20700	LMNB1	0.039	0.2008	0.422
P32320	CDA	0.193	1.3152	0.6664
O95208	EPN2	-0.5195	1.5677	0.2898
Q9C0C9	UBE2O	-0.2631	1.8055	0.5583
P31483	TIA1	-0.6052	0.8528	1.4919
O75368	SH3BGRL	0.4476	0.8503	1.6898
P50995	ANXA11	-0.2853	1.9307	0.4479
Q9H074	PAIP1	-0.0029	0.0353	0.0523
Q96KM6	ZNF512B	-0.4583	2.976	0.0065
Q27J81	INF2	-0.0917	0.0508	0.3487
Q9UEU0	VTI1B	0.1416	0.4447	0.2629
Q676U5	ATG16L1	-0.2887	3.0558	1.1841
O94967	WDR47	0.6169	1.8123	3.0918
Q96B45	C10orf32	1.3009	4.0513	2.677
Q08379	GOLGA2	0.213	0.8934	0.6721
O95721	SNAP29	-0.0917	0.4164	0.1246
Q96PZ0	PUS7	-0.4637	1.7195	2.6816
O95881	TXNDC12	0.0198	0.6258	0.5977
Q9UHG3	PCYOX1	0.4323	2.1168	0.9185
Q9NWH9	SLTM	0.0526	0.5023	0.6307
P67936	TPM4	0.5611	1.9489	2.5725
P11474	ESRRA	0.4194	3.4307	0.2156
P36952	SERPINB5	-0.1594	0.7094	0.4245
Q99836	MYD88	0.3894	0.2281	1.9222
P05783	KRT18	0.1732	0.2554	0.8937
Q9NXR1	NDE1	-0.1517	0.594	0.1091
Q8NI27	THOC2	-0.3638	1.3186	1.6034
Q99733	NAP1L4	-0.0675	0.6301	0.0093
P62263	RPS14	-0.1169	0.2764	0.8273
Q9UBT2	UBA2	0.0194	0.1417	0.1916
Q5T5U3	ARHGAP21	-0.2741	0.3261	1.2238
P12277	CKB	-0.0781	0.0421	0.5057
Q16799	RTN1	0.3564	0.7617	3.847
Q13618	CUL3	0.228	0.3476	1.2961
Q86VM9	ZC3H18	0.3525	0.9657	0.8557
Q96PV6-2	LENG8	-0.3754	1.4756	0.257
O14929	HAT1	-0.2717	0.9785	1.4137
P17980	PSMC3	-0.2752	0.7046	1.3007
P07339	CTSD	-0.5024	4.2634	1.7839
Q9NX20	MRPL16	0.2726	0.4201	1.1224
Q86UY6	NAA40	-0.8948	3.7149	2.5563
P22694	PRKACB	0.8374	1.9438	1.5644
Q8IXJ6	SIRT2	0.5876	1.5635	1.0209
P21359	NF1	0.0473	0.1821	0.2666
Q9Y5S2	CDC42BPB	0.0453	0.2028	0.409
P78417	GSTO1	-0.128	0.5094	0.09
Q14847	LASP1	0.1893	0.2224	0.9313
Q96I99	SUCLG2	-0.0752	0.1701	0.5399
O60488	ACSL4	0.1507	1.1723	0.3925
Q8TCF1	ZFAND1	-0.6177	3.5433	0.7264
O75369-8	FLNB	0.2928	1.7569	1.5147
P10586	PTPRF	-0.1175	0.0087	0.5954
Q9UBU9	NXF1	0.2857	1.5679	0.7252
P52306	RAP1GDS1	-0.2281	1.3922	0.3384
Q9H8Y5	ANKZF1	-0.6474	1.5171	3.5615
Q5SY16	NOL9	-0.1391	0.0622	0.6279
P26885	FKBP2	0.0607	0.1949	0.5297
P62979	RPS27A	-0.118	0.2028	0.4933
Q9HB90	RRAGC;RRAGD	0.4844	1.7554	0.8415
D6RED7	RPS3A	-2.4291	7.2485	4.3968
Q8NFV4	ABHD11	0.4086	3.6487	0.138
Q9Y2W2	WBP11	0.2654	0.2006	1.2996
P49840	GSK3A	0.1064	0.1184	0.2188
O43805	SSNA1	-1.3345	3.2302	4.9057
P61006	RAB8A	0.4357	1.1108	2.0989
Q9H1E3	NUCKS1	0.2409	0.1458	1.0284
P14735	IDE	0.1232	0.6344	0.206
Q4LE39	ARID4B	-0.3808	0.7426	0.5096
O94979	SEC31A	0.1821	0.0835	1.0317
G5E9M5	ILF3	-0.0301	0.3564	0.1292
Q9NXG6	P4HTM	-0.0109	0.0013	0.1115
Q96GD0	PDXP	0.3359	0.9075	2.067
Q16775	HAGH	0.146	0.518	1.2755
P33778	HIST1H2BB;HIST2H2BE;HIST1H2BO;HIST1H2BJ	-0.0024	0.8444	0.9865
Q96IX5	USMG5	-0.0302	0.559	0.1161
Q16891-2	IMMT	0.1232	0.4139	0.4835
Q969V6	MKL1	0.6789	1.287	1.9245
O95571	ETHE1	0.2857	1.6608	0.2668
Q9HB40	SCPEP1	-0.0502	0.0185	0.2014
Q5W0V3	FAM160B1	0.4005	0.3124	1.8894
Q56P03	EAPP	0.391	4.1192	0.2437
Q15022	SUZ12	-0.1819	0.0779	1.2891
P50748	KNTC1	-0.3685	0.0197	1.1871
O75663	TIPRL	-0.403	1.1906	1.2837
Q9BQC3	DPH2	-0.4015	0.0143	1.5973
Q9H9C1	VIPAS39	-0.1193	1.0827	0.0988
O43815	STRN	-0.5641	0.9184	1.4948
Q66K74	MAP1S	-0.4994	3.2421	0.1982
P34949	MPI	-0.709	1.3958	2.9299
Q13564	NAE1	-0.3541	0.6931	2.2797
Q6P9B6	TLDC1	-0.2725	1.3082	0.3803
Q9H3S7	PTPN23	-0.4161	0.0089	1.3654
P38606	ATP6V1A	0.4617	1.7228	2.3491
P49841	GSK3B	-0.0826	0.7952	0.1006
O00442	RTCA	-0.1847	0.6203	0.0767
Q12788	TBL3	-0.327	0.2634	2.0211
Q7L5D6	GET4	0.2641	0.3069	0.8537
Q9H788	SH2D4A	0.2782	0.4598	1.6318
Q8TBC3	SHKBP1	-0.0298	0.3333	0.0629
Q9Y2F5	ICE1	0.129	0.4755	0.1545
P20810-6	CAST	-0.2558	1.4211	1.0028
Q9UBQ5	EIF3K	-0.2082	0.0919	1.6005
P50548	ERF	-0.5076	0.7763	0.8088
P07858	CTSB	-0.2368	0.0828	1.2664
O00443	PIK3C2A	-0.0996	1.1252	0.3298
Q9HB71	CACYBP	-0.2327	0.7993	0.4689
P61158	ACTR3	-0.5314	0.7545	4.9256
Q15393	SF3B3	-0.0073	0.4558	0.2364
P62906	RPL10A	-0.2366	0.5295	1.3041
P53367	ARFIP1	0.1499	0.3384	0.7427
O95563	MPC2	-0.4002	0.9991	1.6023
Q96FZ2	HMCES	0.0753	0.3856	0.4021
P26373	RPL13	-0.1064	0.4504	0.2537
Q69YN4	KIAA1429	-0.0282	0.153	0.2892
Q9H2W6	MRPL46	-0.4259	1.6172	0.8032
Q9UKN8	GTF3C4	-0.3505	0.9854	1.929
Q13123	IK	-0.0489	0.1871	0.3177
Q9UJX3	ANAPC7	-0.0921	0.1161	0.2243
Q9NRX2	MRPL17	0.1864	1.4449	0.0722
Q9Y5B8	NME7	0.231	3.7479	0.2625
O60784	TOM1	-0.2257	1.4545	0.167
P21912	SDHB	0.3074	0.6778	1.5681
Q86UK7	ZNF598	-0.0142	0.0245	0.0906
Q9UNW1	MINPP1	0.8345	2.3813	0.0543
Q13426	XRCC4	-0.2137	1.0952	0.1677
Q6PJI9	WDR59	-0.0246	0.0391	0.0693
Q9P0U1	TOMM7	0.4452	0.5807	2.0518
P11532	DMD	0.3166	0.5955	0.8744
P30530	AXL	-0.2132	1.7596	0.437
P15311	EZR	0.0935	0.5461	0.2213
P08670	VIM	0.1101	0.0098	0.6698
Q9NVC6	MED17	-0.3444	0.2109	2.1083
Q86SZ2	TRAPPC6B	1.1073	2.3689	2.7148
E9PMS6	LMO7	0.2634	0.8693	0.9434
P25788	PSMA3	0.0578	1.4964	0.4641
P61088	UBE2N	-0.1264	2.5126	0.148
O60942	RNGTT	-0.06	1.4079	0.5044
Q0VDD8	DNAH14	0.7878	1.7081	1.5422
Q9UBQ7	GRHPR	0.0528	0.1751	0.3862
Q9BTV4	TMEM43	0.0466	0.077	0.3082
O00429	DNM1L	-0.4806	2.5675	1.1431
Q5SWX8	ODR4	0.3204	1.4026	0.3975
Q9HD26	GOPC	0.5061	1.0022	1.54
O95248	SBF1	0.4003	0.9562	0.7202
Q6NS38	ALKBH2	-0.1802	0.3533	0.5799
P11234	RALB	0.2813	1.5866	0.1184
A8MY62	LACTBL1;MGAT5B	0.3101	0.1622	1.6415
Q15554	TERF2	0.1192	1.7501	0.6324
O95298	NDUFC2	0.2668	0.1227	1.3099
P49815	TSC2	0.4221	0.3333	1.2623
O60762	DPM1	-0.5144	1.7383	2.4208
P62241	RPS8	-0.1011	0.2256	0.4642
Q7Z6I8	C5orf24	1.0393	1.9994	1.5716
P18615	NELFE	-0.2315	2.0967	0.0345
Q15388	TOMM20	-0.103	0.7124	0.1556
P35754	GLRX	-0.1992	0.7278	0.3704
Q14651	PLS1	-0.4815	0.668	1.5218
O60518	RANBP6	0.027	0.1922	0.1415
Q8NC60	NOA1	-0.6031	1.6907	1.5457
Q6UW63	KDELC1	0.5713	1.6671	0.9448
Q13043	STK4	0.2609	0.1945	1.9037
Q86VQ1	GLCCI1	0.2376	0.5446	1.4148
Q15650	TRIP4	-0.0148	0.116	0.0553
O00401	WASL	-0.2644	1.997	0.4303
O60313	OPA1	-0.035	0.4013	0.0404
Q92734	TFG	-0.0295	0.0383	0.1749
Q15436	SEC23A	0.0891	0.5546	0.7653
Q8IWZ8	SUGP1	-0.465	0.5785	0.8727
O15427	SLC16A3	0.6126	1.0546	3.5452
Q13596	SNX1	-0.2495	0.3028	1.0493
Q9UHD9	UBQLN2	0.047	0.5931	1.006
P17858	PFKL	-0.4098	0.1495	2.2713
Q5VZ89	DENND4C	-0.0932	0.0236	0.4452
P53597	SUCLG1	0.2568	0.2599	1.4071
Q96MU7	YTHDC1	0.4583	1.0935	1.0002
Q96AC1	FERMT2	0.2717	0.5224	1.3964
P46734	MAP2K3	-0.0252	0.2812	0.092
Q9H8Y8	GORASP2	0.0581	0.1534	0.2111
O76031	CLPX	-0.0969	0.583	0.1127
Q9P258	RCC2	0.0636	0.6243	0.1563
Q9BRU9	UTP23	0.3246	0.385	0.6065
P49720	PSMB3	-0.3033	0.2905	1.8539
Q12981	BNIP1	-0.4461	0.9011	0.7393
Q96K17	BTF3L4	-0.035	1.401	0.6088
P30101	PDIA3	0.3398	0.5374	2.0116
P40261	NNMT	-0.3966	1.5309	1.0155
P05121	SERPINE1	-2.1202	2.3705	2.0391
B4DLN1	MRPL12	0.0787	0.6582	0.0702
Q8WX92	NELFB	0.3844	2.1045	0.5345
P22695	UQCRC2	0.154	1.2961	0.279
Q9NQS1	AVEN	0.2464	0.3511	0.9132
P61978-2	HNRNPK	0.1467	2.1163	0.1696
O94874	UFL1	0.066	0.1903	0.4022
Q9Y4W6	AFG3L2	-0.1538	0.1686	0.7557
P86791	CCZ1;CCZ1B	-0.3231	0.1901	1.5086
Q01085-2	TIAL1	-0.5026	1.1265	2.0501
P45984	MAPK9;MAPK10	-0.2337	2.3657	0.0113
P48200	IREB2	-0.3812	3.2856	0.0795
Q7LBR1	CHMP1B	0.1267	0.2337	0.2167
O15381	NVL	-0.5143	1.1598	2.7854
Q15050	RRS1	-0.2586	0.2445	1.2936
Q68DH5	LMBRD2	-0.2122	0.2152	0.0752
Q8TC12	RDH11	0.5032	1.5922	1.5955
Q06330	RBPJ	0.6197	1.8673	1.3722
Q02818	NUCB1	-0.1002	0.747	0.1467
Q5C9Z4	NOM1	-0.4425	3.3831	1.1018
P07954	FH	-0.0191	0.2954	0.1045
Q9HD33	MRPL47	0.1841	0.6253	0.4008
Q9UPN6	SCAF8	-0.2066	0.353	0.4863
P06753-2	TPM3	0.6042	2.9048	3.3917
O43427	FIBP	-0.3673	0.0819	1.6248
P61020	RAB5B	-0.3611	0.1226	1.3759
P40121	CAPG	0.0638	0.3803	0.132
Q9NYL4	FKBP11	0.4167	0.5316	1.4973
Q6FI81	CIAPIN1	0.2319	0.3229	1.3139
Q9BUT1	BDH2	0.4158	1.0173	0.6631
P21333	FLNA	0.0778	0.2593	0.2321
O75695	RP2	0.008	1.1452	0.7966
Q86XI2	NCAPG2	0.017	0.461	0.1794
P27797	CALR	-0.0866	1.2343	0.0466
Q9Y613	FHOD1	-0.2752	1.2146	0.687
P30085	CMPK1	-0.1201	1.2389	0.0182
O75394	MRPL33	-0.0251	0.3611	0.2625
P47712	PLA2G4A	-0.3021	0.1813	2.2945
Q9UNX3	RPL26L1	0.4128	0.4237	1.0699
F5GWP8	KRT17	0.2221	1.3099	0.3465
Q6NUK1	SLC25A24	-0.3039	1.499	1.1208
P46108-2	CRK	-1.0857	0.0487	8.0028
P16435	POR	0.2107	0.4442	0.9593
Q8N6R0	METTL13	-1.3065	3.5998	2.5855
P35749	MYH11	-3.961	8.7778	7.1133
P50502	ST13;ST13P5;ST13P4	0.2353	1.9088	0.0071
Q9UGP8	SEC63	0.0477	0.107	0.3593
Q15555	MAPRE2	-0.1182	0.2776	0.2548
P33240	CSTF2	0.1101	0.2038	0.5044
Q8IWA4	MFN1	-0.0536	0.8688	0.2391
Q96PY5	FMNL2	-0.1931	0.5822	0.3796
O95263	PDE8B	0.4039	0.7842	0.9422
Q13427-2	PPIG	-0.0402	0.453	0.0739
P52630	STAT2	-0.0758	0.3546	1.4519
I3L2B0	CLUH	0.2153	0.1384	0.531
Q9NZQ3	NCKIPSD	0.2458	0.0727	1.151
Q9H8V3	ECT2	-0.3295	1.0592	0.1646
P27707	DCK	0.1109	0.1333	0.5986
Q9H1Y0	ATG5	-0.1024	0.1341	0.0682
E7EVA0	MAP4	-0.0478	0.927	0.2181
O00499	BIN1	-0.156	0.7455	0.3623
Q92667	AKAP1	-0.6123	1.2434	2.8092
Q07955	SRSF1	0.4008	3.1553	1.3893
Q86SF2	GALNT7	0.1742	0.5189	0.6003
Q5T3J3	LRIF1	0.3594	0.9436	0.5183
Q53H82	LACTB2	-0.3861	0.7895	0.9459
P31948	STIP1	0.2176	1.0999	0.7914
O14920	IKBKB	-0.4885	2.0675	1.4668
Q16719	KYNU	-0.3729	0.9973	2.0635
Q6UB35	MTHFD1L	-0.0155	0.2116	0.0443
Q8IVT2	MISP	0.2163	1.0732	0.2737
P61978-3	HNRNPK	-0.0247	0.1335	0.0468
O96017	CHEK2	0.902	2.186	3.6573
O14976	GAK	-0.4534	1.4937	1.0393
O75152	ZC3H11A	-0.3623	0.1507	1.6445
Q16658	FSCN1	0.1675	1.4275	0.0248
Q16513	PKN2	-0.0982	0.2117	0.5191
Q9BY89	KIAA1671	0.0648	0.8358	0.4787
P28370	SMARCA1	-0.6112	1.4529	1.2638
Q9H0K6	PUS7L	0.4552	1.4552	1.4939
Q02809	PLOD1	-0.1011	0.9239	0.081
Q9BZE4	GTPBP4	-0.3037	0.0835	2.2455
Q96AT1	KIAA1143	0.1508	0.3779	0.4295
Q6ZVM7	TOM1L2	-0.3589	1.0113	0.4573
P46459	NSF	-0.2356	0.0891	1.6648
Q9UKV3	ACIN1	-0.3805	2.2554	1.8448
Q9NZW5	MPP6	-0.4183	0.4017	1.5755
Q9BSQ5	CCM2	-0.6099	1.0327	0.0151
O00567	NOP56	-0.1196	0.2777	0.6039
Q9NRR4	DROSHA	-0.3282	0.1588	0.3523
F5GXE4	ATE1	0.2648	0.8541	0.218
Q3B726	TWISTNB	0.4728	1.2299	2.1922
Q9Y305	ACOT9	0.0873	0.3397	0.7782
M0QYT0		-0.661	3.6906	2.4562
Q9P031	CCDC59	0.896	3.3346	1.5155
O60437	PPL	-0.3595	1.0288	0.7501
O43684	BUB3	-0.1133	0.3652	0.2771
O43149	ZZEF1	-0.2135	0.4027	0.04
P56537	EIF6	0.3244	1.9372	0.6782
O43159	RRP8	0.089	0.967	0.1232
Q5HYI7	MTX3	0.3582	0.1446	1.6017
Q15070	OXA1L	0.7309	2.5001	2.5494
P06858	LPL	0.5921	2.9841	1.1433
O14908	GIPC1	0.1566	0.3491	1.3404
P82663	MRPS25	-0.1403	0.3592	1.1319
P24043	LAMA2	1.4898	4.9589	2.6341
Q9NR30	DDX21	0.0887	0.7329	0.0803
Q9H5V8	CDCP1	0.3876	1.8654	0.989
Q96CS3	FAF2	0.0457	0.3644	0.5708
Q9UHV9	PFDN2	-0.0969	0.0637	0.4715
Q96PU5	NEDD4L;ZNF227	0.8789	2.0286	3.3101
P83111	LACTB	0.2334	0.7788	0.2524
P07099	EPHX1	-0.5302	0.5718	2.9537
C9J0T6	RAB17	0.2001	0.5494	1.2124
Q5JTH9	RRP12	-0.2391	0.3124	1.9664
P08238	HSP90AB1	0.0516	0.2287	0.1489
Q9BQ69	MACROD1	-0.3619	1.2219	1.2522
P62070	RRAS2	0.337	0.4081	1.77
Q9BXW7	CECR5	-0.2661	0.5254	0.656
Q9NV56	MRGBP	0.8885	1.415	2.755
Q8NBS9	TXNDC5	0.4292	0.8976	1.9662
O76070	SNCG	-0.1087	0.3748	0.2438
P98179	RBM3	0.2424	0.9999	2.2622
Q14232	EIF2B1	-0.1492	0.3985	0.4806
Q8IYB7	DIS3L2	0.1664	1.2739	0.1187
P12236	SLC25A6	-0.1748	0.6202	0.7837
Q92796	DLG3	-0.636	0.4928	1.4004
F8VV52	CNOT2	0.4477	0.526	1.7439
Q8IXM2	BAP18;C17orf49;RNASEK-C17orf49	-0.5004	0.2775	1.7049
O00217	NDUFS8	-0.1679	0.0889	0.8716
P61803	DAD1	0.2257	1.1629	0.1457
F5H604	CLASP2	-0.454	2.0241	1.0595
Q9Y237	PIN4	0.2694	0.1885	2.0568
P51114	FXR1	-0.3579	2.2915	0.7684
Q9ULM6	CNOT6	-0.7059	1.88	2.5887
Q14789	GOLGB1	-0.1053	1.0474	0.1723
Q96AQ6	PBXIP1	-0.8712	2.8929	3.5873
Q92945	KHSRP	0.2354	0.7475	1.1659
Q7Z3B1	NEGR1	-0.4355	1.19	0.6327
P00374	DHFR	-0.0995	0.6771	0.0028
Q15208	STK38;STK38L	0.0445	2.5674	1.5564
O15111	CHUK	0.1384	0.2568	0.1874
Q9NR50	EIF2B3	-0.0592	0.153	0.2451
D6RB81	AMACR	-0.205	0.4311	0.5613
Q9UBR2	CTSZ	1.0147	4.8059	2.1936
P40337	VHL	0.5085	1.526	1.3173
P51970	NDUFA8	-0.3606	0.8007	1.354
Q15293	RCN1	-0.0306	0.8297	0.3509
Q8WWH5	TRUB1	-0.0775	0.0775	0.4423
O15320	CTAGE5;CTAGE1	0.3085	0.671	0.497
Q9H3P2	NELFA;WHSC2	-0.1719	0.0714	0.8929
Q8IX01	SUGP2	0.1199	1.3424	0.1407
P33981	TTK	0.0865	0.9149	0.1997
P26006	ITGA3	0.0604	0.1663	0.4421
O15382	BCAT2	0.0144	0.056	0.0247
Q6S8J3	POTEE;POTEF	0.7431	0.8805	2.6292
Q8WU90	ZC3H15	-0.2409	0.5312	0.5034
Q96FJ0	STAMBPL1	0.0524	0.324	0.0141
Q9Y375	NDUFAF1	0.8475	2.8628	2.9214
Q9BZH6	WDR11	-0.1354	0.6484	0.1953
Q7Z5K2	WAPAL	-0.0985	0.7224	0.4091
Q9BT22	ALG1	1.041	4.5717	3.6905
Q6PI48	DARS2	-0.2099	0.4334	1.1667
P13051	UNG	-0.4204	1.0141	2.963
Q96BR5	COA7	0.6246	1.4791	1.2148
Q9Y4W2	LAS1L	-0.2238	0.9852	0.5253
P31150	GDI1	0.0694	0.1514	0.1484
O00767	SCD	-0.4053	1.2433	1.2882
O95905	ECD	0.0018	0.4374	0.3614
P18084	ITGB5	-0.0248	1.2035	0.4862
O95834	EML2	-0.5727	0.1278	3.1051
P83436	COG7	0.0139	0.9034	0.6474
P62633	CNBP	0.3299	1.1009	0.6795
Q8WU76	SCFD2	-0.2228	1.0167	0.4987
P58546	MTPN	-0.3584	0.5638	1.9329
Q9NV06	DCAF13	-0.0118	0.2556	0.3426
O15514	POLR2D	-0.4935	0.8978	1.2979
Q99715	COL12A1	0.184	0.0583	0.2328
Q86YT6	MIB1	-1.6618	5.6334	3.867
Q9UK45	7	-0.2685	0.7277	0.6134
Q96AE4	FUBP1	-0.3681	0.0277	1.15
Q8NFD5	ARID1B	0.7779	1.1935	3.3968
F8VZX2	PCBP2	-0.476	2.0509	1.9556
B7Z468	CAST	-0.3013	0.7141	0.2593
Q15029	EFTUD2	-0.3058	1.1095	1.9582
Q92841	DDX17	0.2238	2.3199	0.5031
Q14691	GINS1	-1.2106	1.1097	6.8545
Q03169	TNFAIP2	0.1723	1.8402	0.0772
P34897	SHMT2	-0.1991	0.4009	1.4081
Q6VN20	RANBP10	-0.407	0.3083	0.7131
Q15046	KARS	0.0411	0.2577	0.0887
Q99627	COPS8	0.0439	0.5261	0.1964
Q8NB49	ATP11C	-0.0519	0.4812	0.6614
Q9ULH1	ASAP1	-0.1593	1.8364	0.135
Q8NHP8	PLBD2	-1.0021	1.3062	0.9427
Q13464	ROCK1	0.8897	1.8617	3.0233
P33316-2	DUT	0.1602	0.8512	0.4487
Q7Z6E9	RBBP6	0.3644	0.3253	1.1835
P22392	NME2	-3.015	9.8797	7.7205
Q9H223	EHD4	0.0086	0.3493	0.2108
P49441	INPP1	-0.0832	0.1693	0.1737
Q9NSK0	KLC4	-0.7025	1.8863	3.3917
Q86UL3	AGPAT6	1.4049	0.2771	6.5649
P51946	CCNH	0.1434	0.0107	0.075
O96019	ACTL6A	-0.189	0.0641	0.8973
Q9Y6X3	MAU2	-0.6329	2.9868	1.6018
Q93096	PTP4A1	-0.0218	1.002	0.6906
Q5QJE6	DNTTIP2	0.4329	1.2854	1.0604
Q15836	VAMP3	0.2112	0.9386	0.5163
Q9H553	ALG2	-0.4306	1.2295	1.0527
Q86YV0	RASAL3	0.1041	0.7495	0.2294
Q14166	TTLL12	-0.0847	0.1626	0.7496
Q9NR31	SAR1A	-0.0675	0.7437	0.1992
P62081	RPS7	-0.2174	0.7216	0.6431
Q8N0X4	CLYBL	-0.2387	0.6872	0.6631
Q15154	PCM1	-0.2943	0.8179	0.4955
O75937	DNAJC8	0.0674	0.2551	0.1378
Q9H410	DSN1	-0.8552	1.5255	1.9906
Q14103	HNRNPD	-0.2391	0.4687	1.2271
Q9BQ95	ECSIT;ZNF428	-0.9833	0.5218	3.5242
Q8IW45	CARKD	0.1571	2.2299	0.4414
Q9BT25	HAUS8	0.2666	2.6357	0.464
O95167	NDUFA3	0.0545	0.0395	0.3487
Q9C0F1	CEP44	-0.9128	0.0392	2.9602
Q10589	BST2	-0.3753	1.8361	0.6583
Q9NPI6	DCP1A	-0.614	1.1244	3.0925
Q96FQ6	S100A16	0.4951	0.4718	3.1622
Q15139	PRKD1	0.5721	1.6495	1.3729
O95716	RAB3D	-0.5033	0.4076	1.4432
Q14197	ICT1	0.9252	2.3725	2.5071
Q14669-4	TRIP12	0.0156	0.2062	0.066
P05091	ALDH2	0.2476	0.7776	0.4766
Q13630	TSTA3	-0.147	0.028	0.7879
P46778	RPL21	0.2234	0.8116	0.5304
Q9Y3A5	SBDS	-0.1077	0.4779	0.1487
P80723	BASP1	-0.0117	0.1473	0.0364
O60229	KALRN	0.1684	0.4115	1.0815
Q9Y5B0	CTDP1	0.0301	0.0721	0.078
P11166	SLC2A1	-0.3138	0.1378	1.7737
P58511	SMIM11	0.237	3.3442	0.6403
Q5T447	HECTD3	-0.0608	1.539	0.7813
Q9BZG8	DPH1	-1.2511	6.1655	4.9173
Q96KA5	CLPTM1L	0.0067	0.4695	0.2157
P46777	RPL5	0.2276	0.9628	0.9475
Q8N9N7	LRRC57	-0.5788	2.8817	1.8919
P84243	H3F3A;H3F3B;H3F3C	0.2484	0.6541	1.1038
Q01968	OCRL	0.3438	2.6392	0.0111
Q96AB3	ISOC2	-0.0211	0.7274	0.6943
Q9NRG9	AAAS	-0.2323	0.4345	0.2792
Q53EZ4	CEP55	0.4607	0.5247	1.1371
P25445	FAS	0.3509	0.7644	0.3918
Q09666	AHNAK	-0.1049	0.8663	0.0824
P56945	BCAR1	-0.0119	1.8386	1.8933
P38435	GGCX	0.0982	0.6291	1.011
Q8NEZ2	VPS37A	0.1676	0.5933	1.2229
Q8IWX8	CHERP	0.2147	1.1416	0.6056
O75382	TRIM3	-0.1362	1.4864	0.149
Q9BVJ7	DUSP23	0.7012	2.2673	3.2844
O60749	SNX2	0.0653	0.3113	0.1103
C9JLW8	FAM195B	0.3553	1.5409	0.3902
Q13362	PPP2R5C	-0.7776	1.7576	1.3975
Q13838	DDX39B;hCG_2005638	-0.3194	0.396	1.6266
Q96JP5	ZFP91	0.3375	0.0553	1.8845
Q9NZD2	GLTP	-0.0573	1.1969	0.3227
O95197-3	RTN3	-0.4835	3.5481	0.3139
Q99622	C12orf57	-0.0271	0.0723	0.1951
O00139	KIF2A	0.3412	0.8809	1.5719
P52948	NUP98	-0.0203	0.3015	0.2838
Q12959	DLG1	0.7504	1.8775	1.9223
Q9UHN6	TMEM2	0.6861	0.02	4.6869
Q5T5C0	STXBP5	-0.0761	1.8369	1.4
Q8N8A6	DDX51	-0.4374	1.0481	0.6913
Q9H5X1	FAM96A	-0.0204	0.0632	0.1052
Q96DE5	ANAPC16	0.5525	4.6431	2.1533
Q9HB07	C12orf10	-0.0501	0.5611	1.2275
Q96QD9	FYTTD1	-0.5222	0.7622	0.5351
Q00653	NFKB2	1.1711	4.5545	2.0328
Q8NFU7	TET1	-0.2127	1.9864	0.4091
Q15631	TSN	0.128	0.2667	0.995
Q7Z4H7	HAUS6	-0.874	2.2702	0.8214
Q15637-5	SF1	-2.5396	0.1498	12.7273
Q86W42	THOC6	-0.077	0.6197	0.6836
Q9BXR0	QTRT1	-0.0971	0.0503	0.0362
P61966	AP1S1	0.37	1.0523	1.0022
Q86U90	YRDC	-0.1805	0.0087	0.9786
Q3YEC7	RABL6	-0.2667	0.3556	1.758
Q03154	ACY1;ABHD14A;ABHD14A-ACY1	0.2271	2.412	1.3918
P60033	CD81	-0.1859	0.779	0.2453
O00562	PITPNM1	0.5873	1.6614	2.4824
Q00169	PITPNA	0.5671	1.1458	1.3387
Q93077	HIST1H2AC;HIST1H2AG;H2AFJ;HIST1H2AJ;HIST1H2AH	-0.19	0.6881	0.3231
P49750-4	YLPM1	-0.061	0.8539	0.1824
Q9H4G0-2	EPB41L1	0.2389	0.7868	0.5733
P54277	PMS1	-0.1099	0.2882	0.281
P47897	QARS	0.0559	0.0876	0.3269
P29692	EEF1D	0.2084	1.1655	0.7682
Q53HC9	TSSC1	0.2996	0.013	1.2842
Q9UH99	SUN2	-0.101	0.43	0.7005
O75665	OFD1	-0.7544	0.1123	5.2878
Q92620	DHX38	-0.121	0.1689	0.421
Q14680	MELK	0.1373	0.1406	0.5587
P10316	HLA-A	0.3606	2.0987	0.0678
O94776	MTA2	0.0774	0.4877	0.0763
Q6P4H8	FAM173B	0.1793	0.1153	1.277
Q92979	EMG1	-0.3748	0.3428	2.3974
P02656	APOC3	1.4668	5.9366	6.6641
P27695	APEX1	0.0617	0.5611	0.056
Q9Y3C6	PPIL1	0.7389	1.0454	3.5878
Q14558-2	PRPSAP1	-0.1919	0.1361	0.9765
P56134	ATP5J2	0.1108	0.1043	0.0598
Q9NYK5	MRPL39	-0.1786	0.2325	0.7917
Q9NPI1	BRD7	0.071	1.3885	0.415
Q93009	USP7	0.0108	0.4247	0.1633
P08865	RPSA	0.0071	0.4801	0.2625
Q6PGP7	TTC37	-0.252	0.6556	1.1347
Q9NY61	AATF	-0.3024	1.0343	1.2195
O60502	MGEA5	0.089	0.0254	0.5279
Q96DG6	CMBL	0.4579	2.4858	1.1113
Q5VTR2	RNF20	0.373	2.1627	1.0082
Q8IZ81	ELMOD2	0.2602	0.2649	0.7404
P82921	MRPS21	-0.0866	0.083	0.3613
Q16795	NDUFA9	0.1052	0.0716	0.6249
Q01780	EXOSC10	-0.2064	0.4081	1.1866
H7BZK6	USP46	-0.0952	1.4482	0.8248
P07711	CTSL;CTSL3P	0.6549	5.7562	0.764
O75190	DNAJB6	0.1421	0.167	0.434
Q9NQ50	MRPL40	0.2175	0.57	0.5552
P33764	S100A3	-0.4415	1.4708	1.425
Q12846	STX4	-0.138	1.1873	0.1756
Q9H3H1	TRIT1	-0.515	1.3957	0.0002
P28074	PSMB5	0.9918	3.5965	2.9346
P49588	AARS	-0.187	0.0489	1.4198
P62873	GNB1	0.5933	2.817	2.7484
Q15056	EIF4H	-0.0107	0.4349	0.2971
Q96K76	USP47	0.0274	0.253	0.2545
P51531-2	SMARCA2	-0.2042	0.3589	0.8166
Q99426	TBCB	0.4409	0.409	3.0403
Q96BH1	RNF25	0.5495	1.4064	1.0596
Q6DKJ4	NXN	0.3935	0.6141	0.9549
Q7Z4W1	DCXR	-0.0525	1.6899	1.2053
Q6I9Y2	THOC7	-0.1764	1.0725	0.197
Q969Z0	TBRG4	0.2341	0.6905	0.479
Q8TD16	BICD2	0.2167	0.0838	1.2014
Q8WXG6	MADD	0.0622	0.9165	0.1417
P54707	ATP12A	-1.3173	2.4205	8.7339
Q92733	PRCC	-0.1614	0.0096	0.5433
Q5TA45	CPSF3L	-0.1537	0.108	0.6576
Q9Y2Z0	SUGT1	0.0358	0.1519	0.2833
Q03013	GSTM4	-0.2212	0.0573	0.7177
P15104	GLUL	0.1208	0.1944	0.871
Q8N5S9	CAMKK1	-0.5565	2.7225	0.5226
P84101	SERF2	-0.0713	0.9695	0.2077
Q6AI08	HEATR6	0.259	0.8944	0.3881
Q9Y5U9	IER3IP1	-0.0439	0.2679	0.3293
Q15032-2	R3HDM1	-0.0391	0.0103	0.3021
Q9BVV7	TIMM21	0.5301	0.6215	1.4671
Q8N3U4	STAG2	-0.1096	0.0705	0.6573
Q9NQT4	EXOSC5	0.2117	2.1449	0.152
Q8TEM1	NUP210	0.2121	0.9581	0.7092
G5E979	ATG4A	-2.4792	13.4563	8.3881
P22392-2	NME2;NME1-NME2;NME1	-0.2989	0.9656	1.5591
Q9NVZ3	NECAP2	-0.2848	1.196	0.0981
Q16512	PKN1	-0.8822	0.8821	5.6618
O75947	ATP5H	0.007	0.3058	0.1372
P48426	PIP4K2A	0.4912	1.3833	0.4449
P60866	RPS20	-0.0141	0.7049	0.427
P63104	YWHAZ	0.014	0.09	0.1231
P04844	RPN2	0.0633	0.0328	0.3679
Q9C0D3	ZYG11B	0.3963	1.0795	0.7761
Q15067-2	ACOX1	-0.265	2.3505	0.1145
Q8NE01	CNNM3	0.1325	1.1111	0.2453
P47755	CAPZA2	0.3593	1.2812	0.8426
Q15366	PCBP2	-2.6997	10.2114	7.6873
P18850	ATF6	0.9697	0.9142	2.8683
Q00403	GTF2B	-0.0039	3.4423	0.4924
Q6P1N0	CC2D1A	-0.0124	0.3361	0.1301
Q9Y4Z0	4	-0.4321	1.2828	1.1723
Q9C0B0	UNK	0.8631	1.724	2.6241
P08195	SLC3A2	0.0567	1.0146	0.397
E9PAU2	RAVER1	-0.3486	0.4611	1.6996
O75746	SLC25A12	0.6059	2.912	0.7082
Q9NW82	WDR70	-0.1361	0.3323	0.5192
P23786	CPT2	-0.0136	0.436	0.4904
O14561	NDUFAB1	0.0587	0.1817	0.5239
E9PB61	ALYREF	-0.0794	0.6689	0.1193
P27449	ATP6V0C	-1.3386	5.7937	3.637
Q13619	CUL4A	0.0582	0.3342	0.1033
Q9Y241	HIGD1A	0.5605	1.649	1.8754
P30084	ECHS1	-0.129	0.888	0.2916
Q7Z7K0	CMC1	0.2308	0.2157	0.6445
Q15717	ELAVL1	-0.0783	0.0213	0.511
Q9NYL9	TMOD3	-0.1041	0.6849	0.2061
P35869	AHR	0.3246	0.0228	0.9674
P08174	CD55	0.0577	0.8918	0.1961
Q13813	SPTAN1	-0.0345	0.3071	0.4394
Q92783	STAM	0.1516	0.0212	0.6095
P31930	UQCRC1	0.1726	0.6892	0.5917
O75691	UTP20	-0.2368	0.1695	1.1968
Q13042	CDC16	-0.1603	0.6192	0.5293
Q7L3B6	CDC37L1	0.2352	0.1067	1.0117
O75970	MPDZ	0.3284	0.6326	0.6673
Q86UE4	MTDH	0.0368	0.032	0.2094
K7EIG1	CLUH	-0.2508	1.2481	1.2975
Q9UDY2	TJP2	-0.1357	0.7697	0.2885
O00400	SLC33A1	-4.2692	0.6194	18.5918
P22059	OSBP	0.4065	3.5754	1.2388
Q5VT52	RPRD2	0.0449	0.203	0.4154
Q9P0V3	SH3BP4	-0.7475	1.8288	2.0333
P60981	DSTN	0.3687	1.5129	1.2679
P49917	LIG4	0.0503	0.4159	0.5569
Q8N5A5	ZGPAT	0.6321	2.0067	1.2968
P18827	SDC1	0.1244	0.5297	0.1004
P13987	CD59	0.5069	0.7076	1.3175
Q15058	KIF14	0.4936	0.4263	1.4212
Q9H269	VPS16	0.1785	0.5478	0.2862
P24752	ACAT1	0.0597	0.3065	0.1458
P48163	ME1	0.3321	1.2353	1.3079
Q9Y5V0	ZNF706	0.3422	1.9307	0.474
Q9UBW7	ZMYM2	-0.763	4.407	1.8421
Q53EP0	FNDC3B	0.582	0.9699	1.0462
P00813	ADA	0.2046	0.2242	0.7709
Q8IYS1	PM20D2	-0.0968	0.1525	0.3474
Q86UE8	TLK2	-0.6855	1.1932	0.7883
O75459	PAGE1	0.092	0.026	0.528
G5E9Z2	CLPTM1L	-1.6449	11.6076	2.3137
O15047	SETD1A	-0.1165	1.1427	0.5633
Q96NC0	ZMAT2	-0.1903	0.3984	0.6588
Q96EY5	MVB12A	-0.0949	1.1708	0.3267
Q16666	IFI16	0.1096	0.6595	0.2111
Q93052	LPP	0.131	1.0615	0.1736
Q9HCC0	MCCC2	-0.1391	0.7977	0.1413
Q96IJ6	GMPPA	-0.4161	1.2621	1.2077
Q04446	GBE1	0.2137	1.0303	0.7524
Q7L0Y3	TRMT10C	-0.1146	1.2449	0.0783
P51452	DUSP3	0.1497	0.4863	0.205
Q14157-1	UBAP2L	0.0697	1.0503	0.1717
Q9NU22	MDN1	-0.13	0.7599	0.2605
O94817	ATG12	-0.4498	0.3594	1.2901
Q02539	HIST1H1A	-0.0861	0.0485	0.3235
Q3ZCM7	TUBB8	-0.5928	2.2354	1.5549
Q9NPD3	EXOSC4	-0.0837	0.2809	0.3541
P09211	GSTP1	-0.2437	0.7022	0.9122
Q9UNF1	MAGED2	0.341	1.5129	1.5829
P07237	P4HB	0.0991	0.1654	0.7805
Q5T8D3-3	ACBD5	0.3979	0.5667	1.227
Q86UV5	USP48	-0.3703	2.8415	0.5614
Q13740	ALCAM	0.3131	0.5006	2.505
Q9BWF3	RBM4;RBM4B	0.3442	1.1002	0.833
Q8N2F6	ARMC10	0.3173	0.8654	0.2798
Q96PU8	QKI	-0.176	0.0517	0.8335
Q9BVM2	DPCD	0.7004	2.6897	0.7962
Q687X5	STEAP4	-0.5992	0.6825	4.9521
P23921	RRM1	0.0386	0.0442	0.2602
Q05682-4	CALD1	0.2445	0.352	1.2798
P45877	PPIC	-0.9815	8.6188	2.2092
Q9NVM4	PRMT7	0.5721	0.6326	1.2658
O14737	PDCD5	0.1417	1.8409	0.0479
Q92989	1	-0.2547	0.5497	2.4573
Q9Y4E8	USP15	-0.0294	0.8393	0.424
P28331	NDUFS1	0.0954	0.3341	0.3542
O00264	PGRMC1	0.5067	3.9993	0.5685
O95218	ZRANB2	0.3994	1.3946	1.4406
Q7Z7F7	MRPL55	0.4828	0.4784	1.5043
P08727	KRT19	0.4728	1.3329	2.8416
Q9H479	FN3K	0.0328	0.2187	0.1153
Q14376	GALE	-0.6296	0.8505	2.648
O75935	DCTN3	0.4052	0.9905	0.6494
Q96BK5	PINX1;SOX7	0.3011	0.6786	0.6624
Q9BZC7	ABCA2	1.7099	8.7761	6.6456
Q9NUW8	TDP1	-0.1897	0.1466	0.3674
Q9NX58	LYAR	0.5212	1.0764	1.4104
P07996	THBS1	1.0473	2.3994	2.3378
Q9BRQ8	AIFM2	0.6068	0.6353	1.6135
Q86YH6	PDSS2	-0.3399	0.3379	1.3618
Q14CX7	NAA25	-0.2861	0.8153	1.2306
Q9H2D6	TRIOBP	1.0993	2.8185	1.7325
O95782	AP2A1	0.0382	0.511	0.0864
P19838	NFKB1	0.2114	0.5421	0.1088
P62318	SNRPD3	0.4	0.4985	2.1028
P11182	DBT	-0.0341	0.1205	0.1119
Q8N584	TTC39C	-0.1208	0.0414	0.2543
Q9NZ52	GGA3	0.3742	0.2893	1.0238
O95139	NDUFB6	-0.0638	1.7025	0.5715
Q969J3	LOH12CR1	0.3118	0.1943	1.5122
P32780	GTF2H1	0.0188	0.4027	0.1538
Q5T6V5	C9orf64	-0.3287	1.5328	0.2884
Q8TED0	UTP15	-0.3093	1.5652	1.0791
Q9NUQ8	ABCF3	-0.0443	0.5244	0.6962
Q92600	RQCD1	0.1665	0.4916	0.3407
Q13263	TRIM28	0.0212	0.2973	0.0711
Q16563-2	SYPL1	-0.0522	0.5719	0.1427
Q9UNL4	ING4	-1.3385	1.3086	2.3871
E7EVD0	CSNK1G3	0.6679	2.0168	1.3648
P31040	SDHA	0.351	1.4093	1.3836
O95400	CD2BP2	1.0141	2.2623	3.5133
Q96PE7	MCEE	-0.7836	1.1749	3.9542
Q92820	GGH	0.0111	0.255	0.0831
Q9BYD6	MRPL1	-0.2584	0.571	0.7655
P33991	MCM4	0.3753	0.1203	3.1644
Q8N7H5	PAF1	-0.2958	0.8689	1.1394
Q13206	DDX10	-0.2132	0.4621	0.7336
Q9H2P9	DPH5	-0.5511	0.293	2.4591
Q9BQE5	APOL2	-0.0012	0.0645	0.1911
Q96AX1	VPS33A	0.4461	1.0014	0.6242
Q9UH62	ARMCX3	0.2166	0.9728	2.0192
Q6FI13	HIST2H2AA3;HIST2H2AC	-0.5681	2.0875	0.4794
O95159	ZFPL1	0.3949	2.0054	0.3559
Q9UMX5	NENF	-0.2697	0.6199	1.268
Q96BY6	DOCK10	-0.806	0.8035	1.058
P42765	ACAA2	-0.1371	0.8571	0.1703
O60220	TIMM8A	0.4727	1.1318	1.3018
P09493-3	TPM1	0.3521	0.3253	2.8748
[truncated: 2,948 more rows]
