# Supplementary material for: Quantitative Proteomics and Differential Protein Abundance Analysis after Depletion of Putative mRNA Receptors in the ER Membrane of Human Cells Identifies Novel Aspects of mRNA Targeting to the ER
Source: Molecules. 2021 Jun 11;26(12):3591. doi: 10.3390/molecules26123591 (PMC8230838; doi:10.3390/molecules26123591)
Supplement: Supplementary file 1 [file molecules-26-03591-s001.zip › Table S8_ERj1_full_lo_2.xlsx]

## Sheet: Sheet 1
Accession	Gene	Full protein name	log2 fold change	Subcellular location	SS or TMH	Number of TMD	Glycosylation sites	SP or TMH seq.	TMH position	AREs in 3´UTR
Q16695	HIST3H3;H3F3B	Histone H3.1t	-6.37501	Chromosome, Nucleus		0	0			0
P62987	UBA52;UBB;RPS27A;UBC;UBBP4	Ubiquitin-60S ribosomal protein L40	-4.19766	Cytoplasm, Nucleus		0	0			2
Q6Y1H2	PTPLB	Very-long-chain (3R)-3-hydroxyacyl-CoA dehydratase 2	-4.04915	Endoplasmic reticulum membrane	TMH	6	1	LVIYNVVMTAGWLVIAVGL	42 - 60	0
P35749	MYH11	Myosin-11	-3.96102	Melanosome		0	0			8
Q8N257	HIST3H2BB	Histone H2B type 3-B	-3.14014	Chromosome, Nucleus		0	1			0
P22392	NME2	Nucleoside diphosphate kinase B	-3.01498	Lamellipodium, Nucleus, Cell projection, Cytoplasm, Ruffle		0	0			0
Q15366	PCBP2	Poly(rC)-binding protein 2	-2.69966	Cytoplasm, Nucleus		0	0			5
Q9NXS2	QPCTL	Glutaminyl-peptide cyclotransferase-like protein	-2.49879	Golgi apparatus membrane	TMH	1	0	LLPLLLALAVGSAFYTIWSGW	35 - 55	0
G5E979	ATG4A		-2.47919							0
P52657	GTF2A2	Transcription initiation factor IIA subunit 2	-2.47373	Nucleus		0	0			1
Q99880	HIST1H2BL	Histone H2B type 1-L	-2.44771	Chromosome, Nucleus		0	1			0
D6RED7	RPS3A		-2.42906							0
Q8N4A0	GALNT4;POC1B-GALNT4	Polypeptide N-acetylgalactosaminyltransferase 4	-2.32502	Golgi apparatus membrane	TMH	1	1	LLLAFLTVAYIFVELLVSTFHAS	13 - 35	19
O95396	MOCS3	Adenylyltransferase and sulfurtransferase MOCS3	-2.19046	Cytoplasm		0	0			6
P19256-3	CD58	Lymphocyte function-associated antigen 3	-2.10569	Cell membrane	SP	1	6	MVAGSDAGRALGVLSVVCLLHCFGFISC		1
Q13393	PLD1	Phospholipase D1	-2.05605	Late endosome membrane, Golgi apparatus membrane, Endoplasmic reticulum membrane, Perinuclear region, Cytoplasm		0	0			8
O95684	FGFR1OP	FGFR1 oncogene partner	-2.03211	Cytoskeleton, Cytoplasm, Microtubule organizing center, Centrosome		0	0			0
O94913	PCF11	Pre-mRNA cleavage complex 2 protein Pcf11	-1.95341	Nucleus		0	0			6
Q9Y3X0	CCDC9	Coiled-coil domain-containing protein 9	-1.91739			0	0			0
Q8IV61	RASGRP3	Ras guanyl-releasing protein 3	-1.87711			0	0			9
Q58FF6	HSP90AB4P	Putative heat shock protein HSP 90-beta 4	-1.8536	Cytoplasm		0	0			0
H0Y459	NCOR1		-1.85131							12
O14556	GAPDHS	Glyceraldehyde-3-phosphate dehydrogenase, testis-specific	-1.76341	Cytoplasm		0	0			0
Q08722	CD47	Leukocyte surface antigen CD47	-1.75586	Cell membrane	SP	5	6	MWPLVAALLLGSACCGSA		16
Q9H4A5	GOLPH3L	Golgi phosphoprotein 3-like	-1.73574	Golgi apparatus, Golgi stack membrane, trans-Golgi network membrane		0	0			7
Q86YT6	MIB1	E3 ubiquitin-protein ligase MIB1	-1.66171	Centrosome, Centriolar satellite, Cell membrane, Cytoskeleton, Cytoplasm, Microtubule organizing center		0	0			23
G5E9Z2	CLPTM1L		-1.64495							0
Q00839-2	HNRNPU	Heterogeneous nuclear ribonucleoprotein U	-1.5697	Nucleus, Cytoplasm, Cell surface		0	0			10
Q92545	TMEM131	Transmembrane protein 131	-1.53743	Membrane	TMH	2	1	FVFILNASLPYHMLATCAEAL	1091 - 1111	1
Q9GZP8	IMUP	Immortalization up-regulated protein	-1.49552	Nucleus		0	0			0
Q12979	ABR	Active breakpoint cluster region-related protein	-1.48086			0	0			0
Q14135	VGLL4	Transcription cofactor vestigial-like protein 4	-1.42101	Nucleus		0	0			3
Q6NW34	C3orf17	Nucleolus and neural progenitor protein	-1.41504	Nucleolus, Nucleus		0	0			0
Q96NT0	CCDC115	Coiled-coil domain-containing protein 115	-1.40527	COPI-coated vesicle, Endosome, Endoplasmic reticulum-Golgi intermediate compartment, Cytoplasmic vesicle, Lysosome		0	0			1
Q99547	MPHOSPH6	M-phase phosphoprotein 6	-1.37783	Cytoplasm, Nucleus, Nucleolus		0	0			5
Q15057	ACAP2	Arf-GAP with coiled-coil, ANK repeat and PH domain-containing protein 2	-1.36534	Endosome membrane		0	0			19
P27449	ATP6V0C	V-type proton ATPase 16 kDa proteolipid subunit	-1.33859	Vacuole membrane	TMH	4	0	ASFFAVMGASAAMVFSALGAAYG	11 - 33	2
O43805	SSNA1	Sjoegren syndrome nuclear autoantigen 1	-1.33446	Centrosome, Cytoplasm, Cytoskeleton, Microtubule organizing center, Nucleus		0	0			0
Q8N6R0	METTL13	Methyltransferase-like protein 13	-1.30651			0	0			0
Q96RL1	UIMC1	BRCA1-A complex subunit RAP80	-1.29057	Nucleus		0	0			3
Q9H4B0	OSGEPL1	Probable tRNA N6-adenosine threonylcarbamoyltransferase, mitochondrial	-1.27556	Mitochondrion		0	0			4
Q9P275	USP36	Ubiquitin carboxyl-terminal hydrolase 36	-1.25856	Nucleus, Nucleolus		0	0			5
Q9BZG8	DPH1	Diphthamide biosynthesis protein 1	-1.2511	Cytoplasm, Nucleus		0	0			0
Q6UVJ0	SASS6	Spindle assembly abnormal protein 6 homolog	-1.24907	Centrosome, Cytoskeleton, Cytoplasm, Microtubule organizing center, Centriole		0	0			7
Q99519	NEU1	Sialidase-1	-1.21236	Cell membrane, Lysosome lumen, Lysosome membrane, Cytoplasmic vesicle	SP	0	3	MTGERPSTALPDRRWGPRILGFWGGCRVWVFAAIFLLLSLAASWSKA		7
P60604	UBE2G2	Ubiquitin-conjugating enzyme E2 G2	-1.20758			0	0			0
Q07817	BCL2L1	Bcl-2-like protein 1	-1.18991	Cytoplasmic vesicle, Mitochondrion outer membrane, Secretory vesicle, Mitochondrion matrix, Microtubule organizing center, Cytoplasm, Mitochondrion inner membrane, Centrosome, Cytosol, Nucleus membrane, Synaptic vesicle membrane, Cytoskeleton	TMH	1	0	FNRWFLTGMTVAGVVLL	210 - 226	3
Q7Z6J9	TSEN54	tRNA-splicing endonuclease subunit Sen54	-1.11051	Nucleolus, Nucleus		0	0			0
Q9UKD1	GMEB2;GMEB1	Glucocorticoid modulatory element-binding protein 2	-1.10451	Nucleus, Cytoplasm		0	0			0
Q9H6B1	ZNF385D	Zinc finger protein 385D	-1.09069	Nucleus		0	0			19
Q9HB19	PLEKHA2	Pleckstrin homology domain-containing family A member 2	-1.08319	Cell membrane, Nucleus, Cytoplasm		0	0			4
Q9UKK6	NXT1	NTF2-related export protein 1	-1.06644	Nucleus, Nucleus speckle, Cytoplasm		0	0			1
P07205	PGK2	Phosphoglycerate kinase 2	-1.05932	Cytoplasm		0	0			0
Q71DI3	HIST2H3A	Histone H3.2	-1.03958	Chromosome, Nucleus		0	0			0
Q96SB3	PPP1R9B	Neurabin-2	-1.03577	Cell projection, Cytoplasm, Cell membrane, Lamellipodium, Dendritic spine, Cytoskeleton, Filopodium, Ruffle membrane, Nucleus, Cell junction, Synapse, Adherens junction		0	0			0
Q9HD34	LYRM4	LYR motif-containing protein 4	-1.01664	Nucleus, Mitochondrion		0	0			6
P49006	MARCKSL1	MARCKS-related protein	-1.00783	Membrane, Cell membrane, Cytoplasm		0	0			0
Q00534	CDK6	Cyclin-dependent kinase 6	-0.992635	Nucleus, Cytoskeleton, Ruffle, Cytoplasm, Microtubule organizing center, Cell projection, Centrosome		0	0			26
P42356	PI4KA	Phosphatidylinositol 4-kinase alpha	-0.990264	Cytoplasm, Cell membrane		0	0			1
Q8TAA5	GRPEL2	GrpE protein homolog 2, mitochondrial	-0.989687	Mitochondrion matrix		0	0			13
P45877	PPIC	Peptidyl-prolyl cis-trans isomerase C	-0.98148	Cytoplasm		0	0			1
P35610	SOAT1	Sterol O-acyltransferase 1	-0.945942	Endoplasmic reticulum membrane	TMH	5	0	IYHMFIALLILFILSTLVV	141 - 159	11
P82094	TMF1	TATA element modulatory factor	-0.939917	Golgi apparatus membrane, Nucleus, Cytoplasm		0	0			26
Q86UY6	NAA40	N-alpha-acetyltransferase 40	-0.894868	Nucleus, Cytoplasm		0	0			1
Q9Y5J9	TIMM8B	Mitochondrial import inner membrane translocase subunit Tim8 B	-0.88436	Mitochondrion inner membrane		0	0			4
P30042	C21orf33	ES1 protein homolog, mitochondrial	-0.880581	Mitochondrion		0	0			0
Q96AQ6	PBXIP1	Pre-B-cell leukemia transcription factor-interacting protein 1	-0.871211	Cytoplasm, Cytoskeleton, Nucleus		0	0			0
Q9H4L7	SMARCAD1	SWI/SNF-related matrix-associated actin-dependent regulator of chromatin subfamily A containing DEAD/H box 1	-0.857877	Nucleus, Chromosome		0	0			8
Q8NBJ7	SUMF2	Sulfatase-modifying factor 2	-0.843772	Endoplasmic reticulum lumen	SP	0	1	MARHGLPLLPLLSLLVGAWLKLGNG		1
O60925	PFDN1	Prefoldin subunit 1	-0.825501			0	0			0
P01024	C3	Complement C3	-0.815919	Secreted	SP	0	3	MGPTSGPSLLLLLLTHLPLALG		0
O43156	TTI1	TELO2-interacting protein 1 homolog	-0.783412	Cytoplasm		0	0			2
Q9UBW7	ZMYM2	Zinc finger MYM-type protein 2	-0.762921	Nucleus		0	0			22
Q9Y680	FKBP7	Peptidyl-prolyl cis-trans isomerase FKBP7	-0.76275	Endoplasmic reticulum lumen	SP	0	2	MPKTMHFLFRFIVFFYLWGLFTA		6
Q9UBP6	METTL1	tRNA (guanine-N(7)-)-methyltransferase	-0.755634	Nucleus		0	0			0
Q96GX5	MASTL	Serine/threonine-protein kinase greatwall	-0.745872	Cleavage furrow, Centrosome, Microtubule organizing center, Cytoplasm, Cytoskeleton, Nucleus		0	0			4
O96007	MOCS2	Molybdopterin synthase catalytic subunit	-0.675363	Cytosol, Cytoplasm		0	0			0
M0QYT0			-0.66098							0
P21964	COMT	Catechol O-methyltransferase	-0.660006	Cytoplasm, Cell membrane	TMH	1	0	LLLAAVLLGLVLLVVLLLLL	7 - 26	2
Q9H8H2	DDX31	Probable ATP-dependent RNA helicase DDX31	-0.654637	Nucleus, Nucleolus		0	0			6
Q14764	MVP	Major vault protein	-0.640751	Nucleus, Cytoplasm, Perinuclear region, Nuclear pore complex		0	0			1
P49593	PPM1F	Protein phosphatase 1F	-0.638123			0	0			6
Q9Y6X3	MAU2	MAU2 chromatid cohesion factor homolog	-0.632838	Nucleus, Nucleoplasm		0	0			4
Q8NDT2	RBM15B	Putative RNA-binding protein 15B	-0.625809	Nucleoplasm, Nucleus		0	0			3
Q01433	AMPD2	AMP deaminase 2	-0.616572			0	0			1
O14972	DSCR3	Down syndrome critical region protein 3	-0.592836			0	0			0
Q13356	PPIL2	Peptidyl-prolyl cis-trans isomerase-like 2	-0.580451	Nucleus		0	0			6
Q8N9N7	LRRC57	Leucine-rich repeat-containing protein 57	-0.57887	Membrane		0	0			16
O94888	UBXN7	UBX domain-containing protein 7	-0.5768	Nucleus		0	0			0
P31937	HIBADH	3-hydroxyisobutyrate dehydrogenase, mitochondrial	-0.51953	Mitochondrion		0	0			1
O15504	NUPL2	Nucleoporin-like protein 2	-0.513011	Nucleus, Nuclear pore complex, Nucleus membrane		0	0			1
P07339	CTSD	Cathepsin D	-0.502386	Extracellular space, Lysosome, Melanosome, Secreted	SP	0	3	MQPSSLLPLALCLLAAPASA		0
