# Supplementary material for: Quantitative Proteomics and Differential Protein Abundance Analysis after Depletion of Putative mRNA Receptors in the ER Membrane of Human Cells Identifies Novel Aspects of mRNA Targeting to the ER
Source: Molecules. 2021 Jun 11;26(12):3591. doi: 10.3390/molecules26123591 (PMC8230838; doi:10.3390/molecules26123591)
Supplement: Supplementary file 1 [file molecules-26-03591-s001.zip › Table S9_ERj1_full_up.xlsx]

## Sheet: Sheet 1
Accession	Gene	Full protein name	log2 fold change	Subcellular location	SS or TMH	Number of TMD	Glycosylation sites	SP or TMH seq.	TMH position
P98160	HSPG2	Basement membrane-specific heparan sulfate proteoglycan core protein	2.90661	Secreted, Extracellular matrix, Extracellular space, Basement membrane	SP	0	17	MGWRAAGALLLALLLHGRLLA
Q15149-8	PLEC	Plectin	2.11127	Cytoskeleton, Cytoplasm, Cell junction, Hemidesmosome		0	0
P33947	KDELR2	ER lumen protein-retaining receptor 2	2.10137	Endoplasmic reticulum membrane	TMH	7	0	IFRLTGDLSHLAAIVILLL	3 - 21
Q8N726	CDKN2A	Tumor suppressor ARF	2.01308	Nucleolus, Mitochondrion, Nucleoplasm, Nucleus		0	0
Q8WUY1	THEM6	Protein THEM6	1.96172	Secreted	SP	0	0	MLGLLVALLALGLAVFA
Q9P0J7	KCMF1	E3 ubiquitin-protein ligase KCMF1	1.74445			0	0
O14684	PTGES	Prostaglandin E synthase	1.72499	Membrane	TMH	4	0	LPAFLLCSTLLVIKMYVVAIITGQVRLRK	13 - 41
P08590	MYL3;MYL1	Myosin light chain 3	1.72313			0	0
O95140	MFN2	Mitofusin-2	1.71408	Mitochondrion outer membrane	TMH	2	0	TGLASLTSRTSMGILVVGGVV	605 - 625
Q9BZC7	ABCA2	ATP-binding cassette sub-family A member 2	1.70991	Lysosome membrane, Endosome membrane	TMH	14	25	PWVLAFEIFIPLVLFFILLGL	22 - 42
Q8WXI7	MUC16;AP1M1	Mucin-16	1.68639	Extracellular space, Secreted, Cell membrane	TMH	1	102	FWAVILIGLAGLLGVITCLIC	14452 - 14472
P33552	CKS2	Cyclin-dependent kinases regulatory subunit 2	1.66715			0	0
Q9UHB6	LIMA1;TRMT1	LIM domain and actin-binding protein 1	1.57021	Cytoplasm, Cytoskeleton, Cell junction, Focal adhesion		0	0
P24043	LAMA2	Laminin subunit alpha-2	1.48981	Basement membrane, Extracellular space, Secreted, Extracellular matrix	SP	0	28	MPGAAGVLLLLLLSGGLGGVQA
O14662	STX16;STX16-NPEPL1	Syntaxin-16	1.4725	Cytoplasm, Golgi apparatus membrane	TMH	1	0	MLVILILFVIIIVLIVVLVGV	302 - 322
P02656	APOC3	Apolipoprotein C-III	1.46685	Secreted	SP	0	1	MQPRVLLVVALLALLASARA
P0CJ92	GOLGA8T;GOLGA8H;GOLGA8K	Golgin subfamily A member 8H	1.42157			0	0
P30049	ATP5D	ATP synthase subunit delta, mitochondrial	1.37872	Mitochondrion inner membrane, Mitochondrion		0	0
P05161	ISG15	Ubiquitin-like protein ISG15	1.37817	Secreted, Cytoplasm		0	0
Q8IVL6	LEPREL2	Prolyl 3-hydroxylase 3	1.37798	Endoplasmic reticulum	SP	0	2	MLRLLRPLLLLLLLPPPGSP
Q99988	GDF15	Growth/differentiation factor 15	1.37025	Secreted	SP	0	1	MPGQELRTVNGSQMLLVLLVLSWLPHGGA
O94788	ALDH1A2	Retinal dehydrogenase 2	1.36826	Cytoplasm		0	0
P15529	CD46	Membrane cofactor protein	1.3591	Cytoplasmic vesicle, Acrosome inner membrane, Secretory vesicle	SP	1	21	MEPPGRRECPFPSWRFPGLLLAAMVLLLYSFSDA
Q15291	RBBP5	Retinoblastoma-binding protein 5	1.30227	Nucleus		0	0
Q96B45	C10orf32	BLOC-1-related complex subunit 7	1.30085	Lysosome membrane		0	0
O75817	POP7	Ribonuclease P protein subunit p20	1.29777	Nucleolus, Cytoplasmic granule, Cytoplasm, Nucleus		0	0
P17342	NPR3	Atrial natriuretic peptide receptor 3	1.28042	Membrane	SP	1	3	MPSLLVLTFSPCVLLGWALLAGGTGG
Q8NBM8	PCYOX1L	Prenylcysteine oxidase-like	1.27802	Secreted	SP	0	1	MARAAPLLAALTALLAAAAAGG
Q9UJY5	GGA1	ADP-ribosylation factor-binding protein GGA1	1.26675	trans-Golgi network membrane, Endosome membrane, Golgi apparatus		0	0
O60504	SORBS3	Vinexin	1.23831	Cell junction, Cytoskeleton, Cytoplasm, Nucleus		0	0
Q9H3R0	KDM4C	Lysine-specific demethylase 4C	1.20787	Nucleus		0	0
Q00653	NFKB2	Nuclear factor NF-kappa-B p100 subunit	1.17119	Cytoplasm, Nucleus		0	0
Q9BQ70	TCF25	Transcription factor 25	1.09992	Nucleus		0	0
Q08AD1	CAMSAP2	Calmodulin-regulated spectrin-associated protein 2	1.09338	Cytoplasm, Cytoskeleton		0	0
Q9Y6Y0	IVNS1ABP	Influenza virus NS1A-binding protein	1.07591	Nucleoplasm, Nucleus, Cytoskeleton, Cytoplasm		0	0
O75419	CDC45	Cell division control protein 45 homolog	1.07545	Cytoplasm, Nucleus		0	0
Q16352	INA	Alpha-internexin	1.05099			0	0
Q93062-3	RBPMS	RNA-binding protein with multiple splicing	1.04281	P-body, Nucleus, Cytoplasm		0	0
Q9BT22	ALG1	Chitobiosyldiphosphodolichol beta-mannosyltransferase	1.04094	Endoplasmic reticulum membrane	TMH	1	0	ASCLVLLALCLLLPLLLLGGW	3 - 23
Q9UBR2	CTSZ	Cathepsin Z	1.01471	Lysosome	SP	0	2	MARRGPGWRPLLLLVLLAGAAQG
Q9UDW1	UQCR10	Cytochrome b-c1 complex subunit 9	1.0141	Mitochondrion inner membrane		0	0
P30508	HLA-C	HLA class I histocompatibility antigen, Cw-12 alpha chain	0.993345	Membrane	SP	1	1	MRVMAPRTLILLLSGALALTETWA
P28074	PSMB5	Proteasome subunit beta type-5	0.991746	Nucleus, Cytoplasm		0	0
O15379	HDAC3	Histone deacetylase 3	0.985332	Cytoplasm, Nucleus, Cytosol		0	0
Q86VN1	VPS36	Vacuolar protein-sorting-associated protein 36	0.981429	Cytoplasm, Nucleus, Membrane, Endosome, Late endosome		0	0
Q01664	TFAP4	Transcription factor AP-4	0.950995	Nucleus		0	0
Q8N5V2	NGEF	Ephexin-1	0.936785	Cell projection, Cytoplasm, Growth cone, Membrane		0	0
O95178	NDUFB2;WUGSC:H_DJ0726N20.gs.b	NADH dehydrogenase [ubiquinone] 1 beta subcomplex subunit 2, mitochondrial	0.933056	Mitochondrion inner membrane		0	0
Q13015	MLLT11	Protein AF1q	0.928732	Microtubule organizing center, Cytoplasm, Cytoskeleton, Nucleus, Centrosome		0	0
Q15276	RABEP1	Rab GTPase-binding effector protein 1	0.927021	Cytoplasmic vesicle, Early endosome, Cytoplasm, Recycling endosome		0	0
Q96NJ6	ZFP3	Zinc finger protein 3 homolog	0.926942	Nucleus		0	0
O00458	IFRD1	Interferon-related developmental regulator 1	0.926521			0	0
Q99808	SLC29A1	Equilibrative nucleoside transporter 1	0.91001	Apical cell membrane, Cell membrane, Basolateral cell membrane	TMH	11	1	AVWLIFFMLGLGTLLPW	13 - 29
Q8NFW8	CMAS	N-acylneuraminate cytidylyltransferase	0.907517	Nucleus		0	0
Q9P031	CCDC59	Thyroid transcription factor 1-associated protein 26	0.895995	Nucleus		0	0
Q7L5Y9	MAEA	Macrophage erythroblast attacher	0.86805	Cell membrane, Nucleus matrix, Cytoplasm, Cytoskeleton		0	0
Q8N5M4	TTC9C	Tetratricopeptide repeat protein 9C	0.863898			0	0
Q8TDX7	NEK7	Serine/threonine-protein kinase Nek7	0.856785	Spindle pole, Centrosome, Nucleus, Microtubule organizing center, Cytoplasm, Cytoskeleton		0	0
P46779	RPL28	60S ribosomal protein L28	0.838449			0	0
Q9Y5J7	TIMM9	Mitochondrial import inner membrane translocase subunit Tim9	0.828975	Mitochondrion inner membrane		0	0
Q32P28	LEPRE1	Prolyl 3-hydroxylase 1	0.819307	Extracellular matrix, Secreted, Endoplasmic reticulum, Extracellular space	SP	0	3	MAVRALKLLTTLLAVVAAASQA
P56199	ITGA1	Integrin alpha-1	0.818022	Membrane	SP	1	26	MAPRPRARPGVAVACCWLLTVVLRCCVS
P51397	DAP	Death-associated protein 1	0.767083			0	0
P51159	RAB27A	Ras-related protein Rab-27A	0.749489	Late endosome, Membrane, Lysosome, Melanosome		0	0
Q08629	SPOCK1	Testican-1	0.732563	Extracellular matrix, Secreted, Extracellular space	SP	0	3	MPAIAVLAAAAAAWCFLQVES
Q92828	CORO2A	Coronin-2A	0.719865			0	0
O00560	SDCBP	Syntenin-1	0.710751	Cytosol, Cell junction, Adherens junction, Cytoskeleton, Secreted, Nucleus, Membrane raft, Melanosome, Focal adhesion, Exosome, Endoplasmic reticulum membrane, Cytoplasm, Cell membrane		0	0
P05165	PCCA	Propionyl-CoA carboxylase alpha chain, mitochondrial	0.679665	Mitochondrion matrix		0	0
Q14739	LBR	Lamin-B receptor	0.635155	Nucleus inner membrane	TMH	8	0	VPGVFLIMFGLPVFLFLLLLM	212 - 232
Q9UL25	RAB21	Ras-related protein Rab-21	0.632145	Endoplasmic reticulum membrane, Early endosome membrane, Golgi apparatus, Cleavage furrow, trans-Golgi network, Cytoplasmic vesicle membrane, Golgi apparatus membrane		0	0
P12694	BCKDHA	2-oxoisovalerate dehydrogenase subunit alpha, mitochondrial	0.608742	Mitochondrion matrix		0	0
P08621	SNRNP70	U1 small nuclear ribonucleoprotein 70 kDa	0.596926	Nucleoplasm, Nucleus, Nucleus speckle		0	0
P62993	GRB2	Growth factor receptor-bound protein 2	0.595917	Cytoplasm, Nucleus, Endosome, Golgi apparatus		0	0
P31942	HNRNPH3	Heterogeneous nuclear ribonucleoprotein H3	0.568927	Nucleus		0	0
P78330	PSPH	Phosphoserine phosphatase	0.565626			0	0
Q96DE5	ANAPC16	Anaphase-promoting complex subunit 16	0.552553	Kinetochore, Centromere, Cytoplasm, Nucleus, Chromosome		0	0
Q7Z3C6	ATG9A	Autophagy-related protein 9A	0.490909	Endoplasmic reticulum membrane, Golgi apparatus, Cytoplasmic vesicle, trans-Golgi network membrane, Late endosome membrane, Autophagosome membrane	TMH	6	1	IFELMQFLFVVAFTTFLVSCV	67 - 87
Q9NZT2	OGFR	Opioid growth factor receptor	0.453398	Nucleus, Cytoplasm		0	0
P49327	FASN	Fatty acid synthase	0.438794	Melanosome, Cytoplasm		0	0
O14745	SLC9A3R1	Na(+)/H(+) exchange regulatory cofactor NHE-RF1	0.41002	Apical cell membrane, Ruffle, Filopodium, Cytoplasm, Cell projection, Microvillus, Endomembrane system		0	0
