# Supplementary material for: Quantitative Proteomics and Differential Protein Abundance Analysis after Depletion of Putative mRNA Receptors in the ER Membrane of Human Cells Identifies Novel Aspects of mRNA Targeting to the ER
Source: Molecules. 2021 Jun 11;26(12):3591. doi: 10.3390/molecules26123591 (PMC8230838; doi:10.3390/molecules26123591)
Supplement: Supplementary file 1 [file molecules-26-03591-s001.zip › Table S10_negatively affected proteins.xlsx]

## Sheet: Blatt1
Supplementary Table 10. Putative clients.
SEC61A1	SEC62	SEC62 KO	SEC63	SEC63 KO	BIP	TRAP	CDG	TRAM1	ERj1	RRBP1	KTN1	SP/TMH	TMD	N-glyco	nM
ACP2		ACP2				ACP2						SP	1	8	35
ADAM10		ADAM10				ADAM10		ADAM10				SP	1	4	60
							ADAM12					SP	1	5	<1
		ADAM17										SP	1	9	<1
ADPGK						ADPGK						SP	0	0	103
		AGA										SP	0	2	<1
		AGPAT3										TMH	2	0	11
		AGPAT4		AGPAT4								TMH	4	0	22
				ALG9								TMH	8	2	6
						ANO10						TMH	8	0	29
ANPEP					ANPEP							TMH	1	10	<1
ANTXR1					ANTXR1	ANTXR1						SP	1	3	39
				APMAP						APMAP		TMH	1	2	194
APP					APP							SP	1	10	181
		ARL6IP6		ARL6IP6								TMH	3	0	2
							ARMC10					TMH	1	0	67
							ARMCX6					TMH	1	0	<1
				ARSB								SP	0	6	<1
										ATL2		TMH	2	0	132
					ATL3					ATL3		TMH	2	0	1718
							ATP1A2					TMH	10	0	<1
							ATP2A3					TMH	10	0	<1
				ATP2C1								TMH	10	0	<1
							ATP13A3					TMH	11	0	9
									ATP6V0C		ATPVO6	TMH	4	0	<1
											AVL9	TMH	1	0	25
		B3GALTL										TMH	1	1	26
B3GAT3					B3GAT3							TMH	1	1	38
									BCL2L1		BCL2L1	TMH	1	0	166
BMP1								BMP1				SP	0	5	5
								BNIP3L				TMH	1	0	5
		BPHL										SP	0	0	35
BST2		BST2		BST2								TMH	1	2	62
				BTN2A1								SP	1	3	9
							C1GALT1					TMH	1	0	18
									C3			SP	0	3	<1
CACNA2D1		CACNA2D1										SP	1	16	13
		CADM4		CADM4								SP	1	3	<1
CALU		CALU										SP	0	1	6183
CCDC134		CCDC134		CCDC134								SP	0	0	30
				CCSMST1								SP	1	0	153
CD46					CD46							SP	1	21	141
									CD47		CD47	SP	5	6	<1
CD58									CD58			SP	1	6	21
				CD59								SP	0	4	<1
						CD63						TMH	4	3	5
										CD109		0SP	0	10	20
										CD151		TMH	4	1	4
					CD320							SP	1	3	181
				CD99L2								SP	1	0	<1
										CDH2		SP	1	7	<1
CDH13							CDH13			CDH13		SP	0	8	<1
							CDIPT					TMH	5	0	17
					CERS2							TMH	6	1	132
							CES2					SP	0	2	15
CGREF1	CGREF1				CGREF1					CGREF1		SP	0	0	<1
CHID1		CHID1										SP	0	0	<1
							CHPF2					SP	1	2	1
							CHRM2					TMH	7	0	<1
							CHST14					TMH	1	2	35
								CLCC1				SP	3	0	91
CLN5		CLN5		CLN5				CLN5				TMH	1	8	<1
				CLU								SP	0	7	97
										CMTR2		TMH	1	0	<1
		CNNM2		CNNM2								TMH	3	1	<1
				CNPY3								SP	0	1	<1
CNPY4						CNPY4		CNPY4				SP	0	0	123
					COL3A1							SP	0	0	<1
COL4A2						COL4A2				COL4A2	COL4A2	SP	0	1	<1
		COL6A1		COL6A1								SP	0	5	4
COLGALT1				COLGALT1								SP	0	3	<1
									COMT			TMH	1	0	560
										CPD		SP	1	15	48
		CPE		CPE								SP	0	2	<1
		CPVL										SP	0	4	47
						CREG1	CREG1					SP	0	3	32
CRELD1		CRELD1		CRELD1								SP	2	2	29
				CRRC8E								TMH	4	2	<1
							CTBS					SP	0	4	13
CTSA	CTSA											SP	0	2	71
CTSB		CTSB						CTSB				SP	0	1	198
		CTSD							CTSD			SP	0	3	739
		CTSZ										SP	0	2	381
					CYB5A							TMH	1	0	<1
CXADR					CXADR							SP	1	2	162
										CYP51A1		TMH	1	0	228
						CYR61		CYR61				SP	0	0	<1
						DAD1						TMH	3	0	464
DAG1										DAG1		SP	1	14	37
					DCBLD1							SP	1	6	1
			DCBLD2									SP	1	6	<1
				DCD	DCD					DCD		SP	0	0	145
DDOST						DDOST						SP	1	0	273
						DEGS1		DEGS1		DEGS1		TMH	6	0	275
				DGKE								TMH	2	0	9
DNAJC3		DNAJC3										SP	0	0	238
DNAJB11	DNAJB11	DNAJB11										SP	0	1	1001
								DNAJC25				SP	0	0	10
										DPY19L1		TMH	11	0	28
							EFNB2					SP	1	2	<1
EGFR						EGFR						SP	1	13	114
				ELOVL1								TMH	7	0	75
ENG							ENG					SP	1	5	30
EPDR1		EPDR1				EPDR1	EPDR1					SP	0	2	12
		ERAP1										TMH	1	5	135
ERLEC1		ERLEC1										SP	0	1	85
ERLIN 2	ERLIN2							ERLIN2				TMH	1	1	492
ERO1L								ERO1L				SP	0	2	510
		ERP44										SP	0	0	446
EXT2							EXT2					TMH	2	0	5
							F3					SP	1	2	<1
FADS2										FADS2		TMH	4	0	<1
		FAM3A										SP	0	0	13
		FAM20B		FAM20B			FAM20B					TMH	1	1	95
					FAM172A							SP	0	0	24
					FDFT1							TMH	2	0	227
FKBP2		FKBP2										SP	0	0	894
FKBP7	FKBP7	FKBP7							FKBP7			SP	0	2	20
FKBP10	FKBP10	FKBP10			FKBP10							SP	0	7	46
FKBP14		FKBP14			FKBP14							SP	0	1	93
						FN1						SP	0	10	<1
					FNDC3A							TMH	1	0	130
FRAS1					FRAS1							SP	1	17	<1
FSTL4	FSTL4											SP	0	1	<1
GAA		GAA										SP	0	7	36
								GALNT3				TMH	1	3	<1
									GALNT4		GALNT4	TMH	1	1	<1
			GALNT13									TMH	1	3	<1
GANAB		GANAB									GANAB	SP	0	1	15
GGCX			GGCX									TMH	5	2	5
GGH		GGH			GGH			GGH		GGH		SP	0	4	42
GLA		GLA		GLA								SP	0	4	164
								GLIPR1				SP	1	0	3
				GLT8D1		GLT8D1						TMH	1	2	4
GNS					GNS							SP	0	13	138
							GPC6					SP	0	0	<1
GPCR5A										GPRC5A		TMH	7	1	82
						GPR107						SP	7	3	10
					GSN							SP	0	0	55
		GUSB				GUSB						SP	0	4	38
					HECTD4							TMH	1	0	3
							HEG1					SP	1	9	<1
HLA-B	HLA-B						HLA-B30462					SP	1	1	<1
						HM13						TMH	9	2	424
						HSD17B7						SP	0	3	50
HSPG2							HSPG2					SP	0	15	4
IGF1R						IGF1R						SP	1	16	21
					IGF2R							SP	1	18	98
IGFBP7										IGFBP7		SP	0	1	4
IKBIP				IKBIP								TMH	1	2	159
				ILVBL								TMH	1	0	1066
						IRE3IP1						TMH	2	0	<1
ITGA6		ITGA6		ITGA6								SP	1	9	6
				ITGA8								SP	1	16	<1
					ITGA11							SP	1	16	<1
ITGAV						ITGAV						SP	1	13	17
ITPR3		ITPR3										TMH	6	0	38
						ITPRIP		ITPRIP				SP	0	2	18
								JPH1				TMH	1	0	18
							JPH2					TMH	1	0	<1
							KCNJ2					TMH	2	0	<1
								KCNN4				TMH	6	0	1
KDELC2		KDELC2										SP	0	2	187
KIA2013					KIAA2013							SP	1	1	5
										L1CAM		SP	1	20	17
							LAMA2					SP	0	28	<1
LAMB1										LAMB1		SP	0	11	193
LDLR					LDLR							SP	1	5	10
						LGALS3BP						SP	0	7	13
		LMAN1										SP	1	0	1355
						LMAN2						SP	1	1	483
							LMBRD2					TMH	9	1	35
LNPEP		LNPEP				LNPEP		LNPEP				TMH	1	17	63
							LOXL2					SP	0	3	7
						LPCAT4						TMH	2	1	79
LRPAP1					LRPAP1							SP	0	1	793
		LRRC8C		LRRC8C								TMH	4	2	<1
		LY6K		LY6K								SP	0	1	103
	MAGT1					MAGT1						SP	4	1	33
				MGAT2								TMH	1	2	11
				MAN1B1								TMH	1	0	16
				MARVELD2								TMH	6	0	9
	MBOAT7				MBOAT7							TMH	7	1	73
					METTL7A							SP	0	0	6
							MFSD10					TMH	11	0	4
MLEC		MLEC										SP	1	1	662
MOGS		MOGS										TMH	1	1	176
MOSPD2						MOSPD2						TMH	1	0	31
					MSMO1							TMH	3	0	343
MTDH								MTDH				TMH	1	0	575
MUC1						MUC1						SP	1	9	<1
		NAGA										SP	0	5	6
						NAGLU						SP	0	6	12
		NCAM1		NCAM1								SP	1	6	<1
NCEH1						NCEH1				NCEH1		SP	0	3	165
						NCNL						SP	1	2	<1
						NENF						SP	0	0	620
							NEO1					SP	0	8	<1
NEU1						NEU1		NEU1	NEU1			TMH	1	3	5
			NIPA1									TMH	9	0	<1
							NOC4L					TMH	3	0	136
							NOMO1					SP	1	3	<1
						NOMO2						SP	1	3	267
						NOMO3						SP	1	3	267
NPTN					NPTN							SP	1	6	138
P4HTM	P4HTM	P4HTM						P4HTM				TMH	1	3	5
										PARL		TMH	7	0	17
				PARP16								TMH	1	0	10
							PCDH17					SP	1	7	1
PCSK9					PCSK9							SP	0	1	439
		PCYOX1										SP	0	3	727
PDIA5	PDIA5	PDIA5										SP	0	0	37
PDIA6										PDIA6		SP	0	0	3001
							PEX13					TMH	1	0	3
		PIEZO1										TMH	36	2	8
PIGG							PIGG					TMH	12	1	20
		PIGN										TMH	15	3	36
		PIGO										TMH	14	1	7
PLA2G15							PLA2G15					SP	0	4	21
PLD3								PLD3				TMH	1	2	82
								PLP2				TMH	4	2	35
											POC1B	TMH	1	1	<1
							PODN					SP	0	4	<1
POFUT1					POFUT1							SP	0	2	304
		POGLUT1										SP	0	4	26
							POM121C					TMH	1	0	23
	POMK											TMH	1	3	<1
PPIC						PPIC						SP	0	0	6
PPT1					PPT1							SP	0	3	444
		PRCP										SP	0	6	43
PRKCSH		PRKCSH										SP	0	2	3
		PRDX4										SP	0	0	161
PTK7		PTK7			PTK7							SP	1	10	<1
									PTPLB		PTPLB	TMH	6	1	19
PTPRF		PTPRF			PTPRF							SP	1	6	109
		PTPRG		PTPRG								SP	1	8	<1
PTPRK		PTPRK		PTPRK								SP	1	12	3
										PTPRZ1		SP	1	24	<1
									QPTCL		QPCTL	TMH	1	0	46
				RBP4								SP	0	0	<1
		RCN1										SP	0	1	8062
					RHBDD2							TMH	5	0	96
RNASET2	RNASET2	RNASET2					RNASET2					SP	0	3	70
	RRP12											TMH	1	0	319
		SCPIP1										SP	0	3
										SDC1		SP	1	6	67
SDF2	SDF2	SDF2										SP	0	0	95
SDF4	SDF4											SP	0	1	609
SEC11A					SEC11A			SEC11A				TMH	1	0	97
SEL1L						SEL1L						SP	1	5	25
						SEMA3B						SP	0	3	2
										SEMA3C		SP	0	7	5
								SEMA6A				SP	1	0	<1
							SEMA7A					SP	0	5	<1
SERPINE2		SERPINE2					SERPINE2			SERPINE2		SP	0	2	<1
							SGMS2					TMH	6	0	4
SGPP1							SGPP1					TMH	9	0	2
		SGSH										SP	0	5	<1
SIL1		SIL1										SP	0	2	149
SLC2A1						SLC2A1						TMH	12	1	80
					SLC2A3							TMH	12	1	31
							SLC2A10					TMH	12	1	<1
										SLC3A2		TMH	1	4	1
						SLC4A2						TMH	10	3	14
SLC7A2	SLC7A2											TMH	14	3	155
							SLC7A14					TMH	15	2	<1
							SLC9A6					SP	13	1	12
SLC20A2		SLC20A2		SLC20A2	SLC20A2							TMH	12	1	13
							SLC22A18					TMH	10	0	1
					SLC29A1							TMH	11	1	2
										SLC38A5		TMH	11	1	101
						SLC35B2						SP	8	0	8
			SLC35F6									SP	9	1	<1
							SLC38A10					TMH	10	0	<1
SLC39A10		SLC39A10				SLC39A10						SP	7	4	174
							SLC39A11					TMH	7	0	<1
							SLC44A2					TMH	10	3	<1
					SLMAP							TMH	1	0	11
					SMIM4							TMH	1	0	149
						SOAT1			SOAT1	SOAT1		TMH	5	0	392
SPCS2						SPCS2						TMH	2	0	94
					SPINK6							SP	0	0	<1
								SPPL2A				SP	9	7	7
										SPTLC1		TMH	1	0	80
								STEAP3				TMH	6	2	11
				STT3A								TMH	11	3	430
						STT3B						TMH	11	5	150
STX6					STX6							TMH	1	0	100
					STX10							TMH	1	0	8
							STX17					TMH	2	0	7
							SULF1					SP	0	10	<1
SUMF1	SUMF1				SUMF1					SUMF1		SP	0	1	23
SUMF2	SUMF2								SUMF2			SP	0	1	385
SUN2										SUN2		TMH	1	1	56
TAPBP		TAPBP			TAPBP		TAPBP					SP	1	1	41
				TBC1D9B								TMH	1	0	30
							TENM3					TMH	1	17	<1
			TEX2									TMH	2	1	5
TGFBI	TGFBI		TGFBI			TGFBI				TGFBI		SP	0	0	256
TMBIM6						TMBIM6						TMH	6	0	28
											TMC1	TMH	6	0	<1
							TMCO3					SP	10	2	<1
							TMED1					SP	1	0	206
TMED5		TMED5				TMED5						SP	1	0	489
							TMEM39A					TMH	8	1	8
							TMEM55B					TMH	2	0	5
					TMEM67							TMH	7	1	1
					TMEM106B						TMEM106B	TMH	1	5	38
									TMEM131			TMH	2	1	2
							TMEM159					TMH	4	0	<1
							TMEM166					TMH	1	0	<1
				TMEM181								TMH	9	0	<1
							TMEM189					TMH	3	0	3442
			TMEM199				TMEM199					TMH	2	0	4
						TMEM205						TMH	4	0	23
						TMEM223		TMEM223				TMH	2	0	21
TMEM256						TMEM256						SP	2	0	<1
							TMEM261					TMH	2	0	<1
				TMTC3								TMH	9	3	51
							TNFRSF11B					SP	0	5	<1
										TNS4		SP	0	0	<1
		TOR1A										SP	0	2	61
TOR1AIP2		TOR1AIP2										TMH	1	1	2
TOR1B										TOR1B		SP	0	2	24
TOR4A								TOR4A				TMH	1	0	4
						TPP1						SP	0	5	112
							TPST2					TMH	1	2	<1
						TRAM1						TMH	8	1	26
							TSPAN10					TMH	3	1	<1
						TUSC3	TUSC3					SP	4	0	15
						TWSG1	TWSG1					SP	0	2	1
TXNDC5	TXNDC5											SP	0	0	889
TXNDC12					TXNDC12							SP	0	0	510
TXNDC15							TXNDC15					SP	1	4	53
UGGT1	UGGT1											SP	0	2	232
UGGT2								UGGT2				SP	0	4	3
				UNC80								TMH	4	0	<1
					UTS2							SP	0	0	<1
		UXS1		UXS1								TMH	1	1	8
		VANGL2		VANGL2								TMH	4	0	<1
						WDR11						TMH	1	0	49
WLS						WLS						TMH	7	0	37
						WNT5A						TMH	1	4	<1
		YIPF2		YIPF2								TMH	5	0	23
