# Supplementary material for: Quantitative Proteomics and Differential Protein Abundance Analysis after Depletion of Putative mRNA Receptors in the ER Membrane of Human Cells Identifies Novel Aspects of mRNA Targeting to the ER
Source: Molecules. 2021 Jun 11;26(12):3591. doi: 10.3390/molecules26123591 (PMC8230838; doi:10.3390/molecules26123591)
Supplement: Supplementary file 1 [file molecules-26-03591-s001.zip › Table S11_positively affected proteins.xlsx]

## Sheet: Blatt1
Supplementay Table 11. Putative compensatory mechanisms.
	SEC61	RRBP1	KTN1	ERj1	BiP	Sec62	Sec63	TRAM1	TRAP	function
ARIH1						X				ubiquitin-ligase
ATF6					X					UPR
BAG1	X									cytosolic chaperone
BAG3	X					X				cytosolic chaperone
CANX					X					ER chaperone
CDC34						X				ubiquitin-ligase
CDC37L1								X		cytosolic chaperone
DNAJB4	X	X								cytosolic chaperone
DNAJB6	X									cytosolic chaperone
DNAJC13						X				cytosolic chaperone
DNAJC17								X		cytosolic chaperone
EMC3		X								protein transport
EM10					X					protein transport
ERj1					X					ER chaperone
ERJ3					X					ER chaperone
ERP44					X					ER chaperone
FKBP15		X								ER chaperone
GET4	X									protein transport
HLTF	X								X	ubiquitin-ligase
HSPB1	X									cytosolic chaperone
HSPA1A	X									cytosolic chaperone
HSPB8	X					X				cytosolic chaperone
HSPH1	X									cytosolic chaperone
HSP90AB1	X									cytosolic chaperone
HSP90B1					X					ER chaperone
HYOU1					X					ER chaperone
ISG15				X						ubiquitin-ligase
ITCH					X					ubiquitin-ligase
KCMF1				X	X					ubiquitin-ligase
LRRC59						X				protein transport
MANF					X					ER chaperone
MARCH5						X				ubiquitin-ligase
MID1	X	X			X	X			X	ubiquitin-ligase
MYCBP2	X					X		X		ubiquitin-ligase
NEDD4	X	X			X					ubiquitin-ligase
NEDD4L						X				ubiquitin-ligase
PDIA3					X					ER chaperone
PDIA4					X					ER chaperone
PPIB					X					ER chaperone
PPIL4					X					ER chaperone
RNF13					X					ubiquitin-ligase
RRBP1			X		X			X		protein trasnport
SEC22B			X							protein transport
SEC23B							X		X	protein transport
SEC24A								X	X	protein transport
SEC31A								X		protein transport
SEC63					X					protein transport
SEL1					X					ERAD
SH3PF1		X								ubiquitin-ligase
SRP54	X				X					protein transport
SRP68	X				X					protein transport
SRP72	X									protein transport
SRPRA	X	X			X	X		X	X	protein transport
SRPRB	X	X			X	X		X	X	protein transport
ST13	X	X				X			X	cytosolic chaperone
TIMM2					X					protein transport
TIMM9				X						protein transport
TIMM23	X									protein transport
TIMM44					X					protein transport
TOMM6	X				X					protein transport
TOMM7	X									protein transport
TRAPß						X				protein transport
UBE2C								X		ubiquitin-conjugating
UBE2T						X				ubiquitin-conjugating
UBE3A					X					ubiquitin-ligase
UBE3C						X				ubiquitin-ligase
UBE4A	X									ubiquitin-ligase
UBE20	X				X					ubiquitin-conjugating
UBES2						X				ubiquitin-conjugating
UBR1	X				X					ubiquitin-ligase
UBR7	X									ubiquitin-ligase
UEVLD					X					ubiquitin-ligase
UFL1	X									ubiquitin-ligase
ZNRF2	X				X					ubiquitin-ligase
