# Supplementary material for: Quantitative Proteomics and Differential Protein Abundance Analysis after Depletion of Putative mRNA Receptors in the ER Membrane of Human Cells Identifies Novel Aspects of mRNA Targeting to the ER
Source: Molecules. 2021 Jun 11;26(12):3591. doi: 10.3390/molecules26123591 (PMC8230838; doi:10.3390/molecules26123591)
Supplement: Supplementary file 1 [file molecules-26-03591-s001.zip › Table S12_AREs in genes coding for negatively affected proteins.xlsx]

## Sheet: Sheet1
Table S12_AREs in 3´UTRs of ARE-containing genes coding for negatively affected proteins after depletion of RRBP1, KTN1 and ERj1, respectively.
	(# AREs-containg gene / # Number of genes)
RRBP1 (101/141 = 72%)				KTN1 (31/45=69%)				ERj1 (57/92=62%)
Gene symbol	Ensemble Gene ID	Number of ‘ATTTA’ motifs as per AERSite2 database		Gene symbol	Ensemble Gene ID	Number of ‘ATTTA’ motifs as per AERSite2 database		Gene symbol	Ensemble Gene ID	Number of ‘ATTTA’ motifs as per AERSite2 database
LYSMD2	ENSG00000140280	2		MYH11	ENSG00000133392	8		UBA52	ENSG00000221983	2
PTPRZ1	ENSG00000106278	5		TMEM106B	ENSG00000106460	43		MYH11	ENSG00000133392	8
TRIM3	ENSG00000110171	1		PNMA2	ENSG00000240694	7		PCBP2	ENSG00000197111	5
AS3MT	ENSG00000214435	19		PLD1	ENSG00000075651	8		GTF2A2	ENSG00000140307	1
KATNAL2	ENSG00000167216	3		PDPK1	ENSG00000140992	10		GALNT4	ENSG00000257594	19
FAM83H	ENSG00000180921	1		GANAB	ENSG00000089597	2		MOCS3	ENSG00000124217	6
DNAJC12	ENSG00000108176	4		COL4A2	ENSG00000134871	1		CD58	ENSG00000116815	1
DDAH1	ENSG00000153904	8		KTN1	ENSG00000126777	3		PLD1	ENSG00000075651	8
TNS4	ENSG00000131746	1		UBE2G2	ENSG00000184787	7		PCF11	ENSG00000165494	6
POLR2M	ENSG00000255529	8		ZBTB11	ENSG00000066422	9		RASGRP3	ENSG00000152689	9
SERPINE2	ENSG00000135919	2		CD47	ENSG00000196776	16		NCOR1	ENSG00000141027	12
DPY19L1	ENSG00000173852	6		GTF2A2	ENSG00000140307	1		CD47	ENSG00000196776	16
PGM2L1	ENSG00000165434	22		VGLL4	ENSG00000144560	3		GOLPH3L	ENSG00000143457	7
TPM1	ENSG00000140416	7		ATP6V0C	ENSG00000185883	2		MIB1	ENSG00000101752	23
TIMM21	ENSG00000075336	5		GALNT4	ENSG00000257594	19		HNRNPU	ENSG00000153187	10
SETDB2	ENSG00000136169	10		NAP1L1	ENSG00000187109	28		TMEM131	ENSG00000075568	1
MTPAP	ENSG00000107951	9		TUBGCP4	ENSG00000137822	9		VGLL4	ENSG00000144560	3
CEP97	ENSG00000182504	21		PYGO2	ENSG00000163348	1		CCDC115	ENSG00000136710	1
NCEH1	ENSG00000144959	5		PI4KA	ENSG00000241973	1		MPHOSPH6	ENSG00000135698	5
NAA16	ENSG00000172766	4		IMPA1	ENSG00000133731	6		ACAP2	ENSG00000114331	19
KRT2	ENSG00000172867	1		GRPEL2	ENSG00000164284	13		ATP6V0C	ENSG00000185883	2
SLAIN2	ENSG00000109171	16		ADK	ENSG00000156110	7		UIMC1	ENSG00000087206	3
CA13	ENSG00000185015	7		EPB41	ENSG00000159023	3		OSGEPL1	ENSG00000128694	4
DCD	ENSG00000161634	1		PAK1	ENSG00000149269	1		USP36	ENSG00000055483	5
AGMAT	ENSG00000116771	1		OXSR1	ENSG00000172939	5		SASS6	ENSG00000156876	7
MPP5	ENSG00000072415	10		SGTB	ENSG00000197860	17		UBE2G2	ENSG00000184787	7
KRT10	ENSG00000186395	2		BCL2L1	ENSG00000171552	3		BCL2L1	ENSG00000171552	3
ELF2	ENSG00000109381	5		ARHGAP18	ENSG00000146376	4		ZNF385D	ENSG00000151789	19
INADL	ENSG00000132849	9		HELLS	ENSG00000119969	2		PLEKHA2	ENSG00000169499	4
SUN2	ENSG00000100242	1		PTBP3	ENSG00000119314	17		NXT1	ENSG00000132661	1
CDH13	ENSG00000140945	8		VCL	ENSG00000035403	6		LYRM4	ENSG00000214113	6
TACC1	ENSG00000147526	11						CDK6	ENSG00000105810	26
LRRC41	ENSG00000132128	1						PI4KA	ENSG00000241973	1
PPP2R1B	ENSG00000137713	5						GRPEL2	ENSG00000164284	13
GINS3	ENSG00000181938	1						PPIC	ENSG00000168938	1
ATL3	ENSG00000184743	18						SOAT1	ENSG00000057252	11
MAD2L1	ENSG00000164109	13						TMF1	ENSG00000144747	26
SKP2	ENSG00000145604	4						NAA40	ENSG00000110583	1
ARPP19	ENSG00000128989	15						TIMM8B	ENSG00000150779	4
USF2	ENSG00000105698	1		Bold = common in KTN1 and ERj1				SMARCAD1	ENSG00000163104	8
SPTLC1	ENSG00000090054	4						SUMF2	ENSG00000129103	1
GPRC5A	ENSG00000013588	5						TTI1	ENSG00000101407	2
CNOT4	ENSG00000080802	10						ZMYM2	ENSG00000121741	22
NCOR1	ENSG00000141027	12						FKBP7	ENSG00000079150	6
CACUL1	ENSG00000151893	14						MASTL	ENSG00000120539	4
BCAR3	ENSG00000137936	3						COMT	ENSG00000093010	2
DCP1A	ENSG00000272886	10						DDX31	ENSG00000125485	6
CD109	ENSG00000156535	18						MVP	ENSG00000013364	1
FOXJ3	ENSG00000198815	8						PPM1F	ENSG00000100034	6
SERPINB8	ENSG00000166401	8						MAU2	ENSG00000129933	4
CPD	ENSG00000108582	13			membrane protein			RBM15B	ENSG00000259956	3
CDK6	ENSG00000105810	26						AMPD2	ENSG00000116337	1
PLEKHA1	ENSG00000107679	35			ATTTA >/= 10			PPIL2	ENSG00000100023	6
FANCD2	ENSG00000144554	4						LRRC57	ENSG00000180979	16
RAB5B	ENSG00000111540	8						UBXN7	ENSG00000163960	16
GAPVD1	ENSG00000165219	33						HIBADH	ENSG00000106049	1
SEMA3C	ENSG00000075223	10						NUPL2	ENSG00000136243	1
SUMF1	ENSG00000144455	1
CMTR2	ENSG00000180917	7
TTC14	ENSG00000163728	2
DEGS1	ENSG00000143753	2
LAMB1	ENSG00000091136	1
GABARAPL2	ENSG00000034713	2
CCDC91	ENSG00000123106	7
IGFBP7	ENSG00000163453	8
C17orf85	ENSG00000074356	11
PARVA	ENSG00000197702	10
SRGAP2	ENSG00000266028	8
TGM2	ENSG00000198959	6
LIMS1	ENSG00000169756	10
CALD1	ENSG00000122786	8
VIPAS39	ENSG00000151445	1
PDCL	ENSG00000136940	9
TOR1B	ENSG00000136816	3
CTNNA1	ENSG00000044115	3
DAG1	ENSG00000173402	1
COL4A2	ENSG00000134871	1
SOAT1	ENSG00000057252	11
ATL2	ENSG00000119787	5
CDH2	ENSG00000170558	1
POLR2H	ENSG00000163882	1
CEP290	ENSG00000198707	2
PTBP3	ENSG00000119314	17
CYP51A1	ENSG00000001630	5
VPS35	ENSG00000069329	14
DDX52	ENSG00000278053	11
C1QBP	ENSG00000108561	2
TOMM34	ENSG00000025772	1
CDK2	ENSG00000123374	2
MSH3	ENSG00000113318	1
EPB41L2	ENSG00000079819	5
SMG9	ENSG00000105771	5
GFPT1	ENSG00000198380	23
GGH	ENSG00000137563	2
ADNP	ENSG00000101126	5
NAPG	ENSG00000134265	12
ACTR1A	ENSG00000138107	2
EIF5B	ENSG00000158417	4
CSE1L	ENSG00000124207	1
PDIA6	ENSG00000143870	1
VCL	ENSG00000035403	6
	Bold = common in KTN1 and RRBP1
