# Supplementary material for: Quantitative Proteomics and Differential Protein Abundance Analysis after Depletion of Putative mRNA Receptors in the ER Membrane of Human Cells Identifies Novel Aspects of mRNA Targeting to the ER
Source: Molecules. 2021 Jun 11;26(12):3591. doi: 10.3390/molecules26123591 (PMC8230838; doi:10.3390/molecules26123591)
Supplement: Supplementary file 1 [file molecules-26-03591-s001.zip › Table S13_proteomeXchange_identifiers.pdf]

The mass spectrometry proteomics data (.raw and .txt files) have been deposited to the ProteomeXchange Consortium via the PRIDE partner repository with the dataset identifiers: PXD011989 and PXD011990 (<http://www.proteomexchange.org>).

|            |                                |           |
|------------|--------------------------------|-----------|
| Orbi2288   | mRNA targeting to the human ER | PXD011989 |
| Sample 1-3 | scr control siRNA              |           |
| Sample 4-6 | P180 siRNA #1                  |           |
| Sample 7-9 | P180 siRNA #2                  |           |

|            |                                |           |
|------------|--------------------------------|-----------|
| Orbi2314   | mRNA targeting to the human ER | PXD011990 |
| Sample 1-3 | scr control siRNA              |           |
| Sample 4-6 | KTN1 siRNA #3                  |           |
| Sample 7-9 | KTN1 siRNA #4                  |           |

|              |                   |           |
|--------------|-------------------|-----------|
| Orbi2314     | ERJ1 experiment   | PXD011990 |
| Sample 1-3   | scr control siRNA |           |
| Sample 10-12 | ERJ1 UTR siRNA #4 |           |
| Sample 13-15 | ERJ1 siRNA #6     |           |
